# Supplementary material
Source: MDPI journal article supplement (https://www.mdpi.com/2073-4441/15/19/3519)
Supplement: s1 [file s1]

Archive with 2 entries (2 files):
- Table S1.xlsx
- water-2438706-supplementary.pdf
