# Supplementary material
Source: MDPI journal article supplement (https://www.mdpi.com/2073-4441/15/19/3519)
Supplement: s1 [file s1 › Table S1.xlsx]

## Sheet: MNP_Mcontrol
ID	m/z	Retention time (min)	Ion mode	Metabolites	HMDB	METLIN	Lipidmaps	kegg	PubChem	CAS	Super Class	Class	Sub Class	level	Score	Fragmentation Score	Adducts	Formula	Mass Error (ppm)	VIP	P-value	adj.P-value	log2(FC)	FC	average(MNP)	average(Mcontrol)	MN1	MN2	MN3	MN4	MN5	MN6	MN7	MO1	MO2	MO3	MO4	MO5	MO6	MO7
0.79_347.0633n	348.071	0.787683	pos	Adenosine monophosphate	HMDB0000045	5111		C00020	6083	61-19-8	Nucleosides, nucleotides, and analogues	Purine nucleotides	Purine ribonucleotides	***	68.9	89.9	M+H, M+Na	C10H14N5O7P	0.646216	21.0724	0.0210995	0.101802	0.978894	1.97095	3.44129e+06	1.746e+06	1.15093e+06	3.26816e+06	3.83195e+06	3.99947e+06	3.34915e+06	4.19242e+06	4.29695e+06	101694	2.18172e+06	3.02605e+06	825224	3.59358e+06	1.88947e+06	604277
10.74_495.3328n	496.34	10.7436	pos	LysoPC(16:0/0:0)	HMDB0010382	61692	LMGP01050018	C04230	460602	17364-16-8	Lipids and lipid-like molecules	Glycerophospholipids	Glycerophosphocholines	***	67.5	99	M+H, M+Na, M+K	C24H50NO7P	0.591583	18.1201	0.0447138	0.143923	-0.763098	0.58923	1.61009e+06	2.73253e+06	805784	696230	1.61021e+06	1.56911e+06	3.30512e+06	856919	2.42727e+06	3.81399e+06	1.85232e+06	2.64214e+06	4.05774e+06	2.65647e+06	2.44309e+06	1.662e+06
0.73_606.0740m/z	606.074	0.730267	neg	Uridine diphosphate-N-acetylgalactosamine	HMDB0000304				1167	7277-98-7	Nucleosides, nucleotides, and analogues	Pyrimidine nucleotides	Pyrimidine nucleotide sugars	***	64	98.1	M-H	C17H27N3O17P2	-0.551013	17.8528	0.0021701	0.0503949	0.981243	1.97417	1.95163e+06	988585	1.99608e+06	2.2812e+06	2.17256e+06	2.0702e+06	1.27029e+06	2.71572e+06	1.15538e+06	457608	1.30649e+06	1.26315e+06	694470	1.33924e+06	1.08949e+06	769649
12.78_264.2454n	282.279	12.7785	pos	(�)-(Z)-2-(5-Tetradecenyl)cyclobutanone	HMDB0037543	92402			10825540	173074-85-6	Organic oxygen compounds	Organooxygen compounds	Carbonyl compounds	*	50	54	M+H, M+NH4, M+H-H2O	C18H32O	0.200132	14.318	0.0123827	0.0833522	0.356179	1.28003	3.27989e+06	2.56235e+06	2.77585e+06	3.06203e+06	3.39009e+06	4.12195e+06	2.94924e+06	3.32279e+06	3.33729e+06	2.08037e+06	2.54314e+06	2.82727e+06	2.23255e+06	3.4931e+06	2.27763e+06	2.48242e+06
0.73_504.1692n	527.159	0.72705	pos	Levan	HMDB0003539	6945		C01355	22833608	9013-95-0	Organic oxygen compounds	Organooxygen compounds	Carbohydrates and carbohydrate conjugates	*	49.3	49.7	M+H-H2O, M+K, M+H, M+NH4, M+Na	C18H32O16	0.349111	13.504	0.00325423	0.0569514	1.0075	2.01042	1.12905e+06	561601	1.65261e+06	917641	968740	1.09801e+06	1.22246e+06	666504	1.3774e+06	919425	582229	276442	637150	366957	324554	824453
10.95_521.3485n	522.356	10.9454	pos	LysoPC(18:1(11Z)/0:0)	HMDB0010385	61695	LMGP01050138	C04230	53480465		Lipids and lipid-like molecules	Glycerophospholipids	Glycerophosphocholines	***	64.3	86.8	M+H, M+K, M+Na	C26H52NO7P	0.735394	13.099	0.0082086	0.0724921	-1.18242	0.44061	402034	912448	215649	208892	291863	354138	991264	215046	537386	1.40195e+06	637471	741563	1.21979e+06	981277	898129	506949
4.92_171.1261n	194.115	4.91752	pos	2-Amino-3-cyclohexylpropanoic acid	HMDB0244979				95475		Organic acids and derivatives	Carboxylic acids and derivatives	Amino acids, peptides, and analogues	*	41.4	10	M+Na, M+K	C9H17NO2	0.906613	12.4226	0.00609121	0.065016	0.416382	1.33458	1.98087e+06	1.48427e+06	1.6655e+06	1.83937e+06	1.95758e+06	2.20838e+06	1.72702e+06	2.32851e+06	2.13974e+06	1.36975e+06	1.39924e+06	1.62649e+06	1.29632e+06	2.10535e+06	1.18643e+06	1.4063e+06
1.16_164.0475n	182.081	1.15645	pos	2-Hydroxycinnamic acid	HMDB0002641	6727		C01772	637540	614-60-8	Phenylpropanoids and polyketides	Cinnamic acids and derivatives	Hydroxycinnamic acids and derivatives	*	53.3	68.5	M+H, M+NH4, M+H-H2O	C9H8O3	1.05055	12.1505	0.00116181	0.0438469	-1.12936	0.457119	340618	745141	300243	256624	266404	283135	518802	366738	392384	909169	596657	583226	1.16895e+06	469161	746098	742726
1.00_347.0630n	346.056	0.997533	neg	3'-AMP	HMDB0003540	63401		C01367	41211	84-21-9	Nucleosides, nucleotides, and analogues	Ribonucleoside 3'-phosphates	Unclassified	***	49.7	50.5	M-H, 2M-H	C10H14N5O7P	-0.304914	12.0008	0.0305677	0.119155	1.05185	2.07318	1.10432e+06	532671	424731	1.28316e+06	1.54578e+06	1.19335e+06	874219	1.73615e+06	672885	27742.2	699871	887951	216258	1.0761e+06	651544	169235
0.75_174.0642n	175.071	0.745533	pos	Formiminoglutamic acid	HMDB0000854	5817		C00439	439233	816-90-0	Organic acids and derivatives	Carboxylic acids and derivatives	Amino acids, peptides, and analogues	***	64.1	89.1	M+H-H2O, M+Na, M+H	C6H10N2O4	0.84114	11.8776	0.00209192	0.0501279	3.02692	8.15065	473546	58099.2	236470	364315	269565	473928	285918	677379	1.00725e+06	87944.5	91095	74792	27984	33614.6	42344.6	48919.4
9.51_215.1578m/z	215.158	9.50793	pos	4-Ethyl-2-hexylthiazole	HMDB0040111	94652			55271529	96693-85-5	Organoheterocyclic compounds	Azoles	Thiazoles	*	40.9	7.53	M+NH4	C11H19NS	0.855249	11.5071	0.00108456	0.0436899	-9.91971	0.00103245	368.578	356994	497.474	368.025	503.665	371.311	278.298	286.715	274.559	85485.7	230394	615070	401178	613023	444287	109519
14.56_88.0763m/z	88.0763	14.5608	pos	2-(1-Aziridinyl)ethanol		73039		C19332	14074	1072-52-2	Unclassified	Unclassified	Unclassified	*	51	63.6	M+H	C4H9NO	6.62065	11.3122	0.00313779	0.056412	0.518293	1.43226	1.32221e+06	923165	1.07073e+06	1.16192e+06	1.24606e+06	1.25363e+06	1.15928e+06	1.83715e+06	1.52671e+06	840628	900345	983305	903658	1.11512e+06	904825	814273
13.44_804.5516m/z	804.552	13.4412	pos	PC(18:3(10,12,15)-OH(9)/P-18:1(11Z))	HMDB0289722						Unclassified	Unclassified	Unclassified	*	49.8	62.4	M+Na	C44H80NO8P	0.229012	10.6104	0.0286302	0.116519	0.408235	1.32706	1.68726e+06	1.27143e+06	1.69893e+06	1.52098e+06	1.77849e+06	1.77641e+06	1.34473e+06	1.90035e+06	1.79095e+06	572862	1.18802e+06	1.41447e+06	1.18401e+06	1.87564e+06	1.1567e+06	1.50828e+06
1.40_132.1021m/z	132.102	1.39708	pos	L-Alloisoleucine	HMDB0000557	58006			99288	1509-34-8	Organic acids and derivatives	Carboxylic acids and derivatives	Amino acids, peptides, and analogues	***	57.8	88.3	M+H	C6H13NO2	1.53773	10.6009	0.0145568	0.0880376	-0.644088	0.639897	706114	1.10348e+06	608364	558070	721251	642497	659356	839004	914255	1.57575e+06	1.03129e+06	812147	1.50079e+06	609226	1.07727e+06	1.11789e+06
13.89_534.2632n	535.271	13.8943	pos	Pyropheophorbide a	HMDB0256993						Unclassified	Unclassified	Unclassified	*	50.9	56.8	M+H, M+Na	C33H34N4O3	0.270416	10.3142	0.0295432	0.11759	1.08942	2.12789	789059	370818	1.44673e+06	941812	661859	433162	1.09169e+06	736373	211785	292916	304118	127740	356259	395680	423179	695832
0.71_504.1689n	549.167	0.71145	neg	Dextran	HMDB0247628				4125253		Lipids and lipid-like molecules	Fatty Acyls	Fatty acyl glycosides	*	58.1	91.8	M-H, M+FA-H	C18H32O16	-0.322476	10.2248	0.00900986	0.0750219	1.47247	2.77496	566219	204046	1.04619e+06	495316	432560	482787	786362	218821	501504	389973	198042	56251	227222	66711.8	76863.2	413259
12.59_820.5848m/z	820.585	12.5869	pos	PE(20:4(5Z,8Z,11Z,14Z)/22:2(13Z,16Z))	HMDB0009404	60800	LMGP02010959	C00350	52924660		Lipids and lipid-like molecules	Glycerophospholipids	Glycerophosphoethanolamines	*	37	0	M+H	C47H82NO8P	-0.345941	10.031	0.000974418	0.0429044	0.730852	1.65962	749531	451628	696029	872972	774772	661067	579048	864713	798118	341328	248158	555099	407976	698785	458982	451070
13.44_788.5563m/z	788.556	13.4412	pos	PC(P-18:1(9Z)/18:3(9Z,12Z,15Z))	HMDB0011312	62128			53480807		Lipids and lipid-like molecules	Glycerophospholipids	Glycerophosphocholines	*	45.2	63.5	M+Na	C44H80NO7P	-0.246771	9.88163	0.0454632	0.145042	0.360957	1.28428	1.70147e+06	1.32484e+06	1.73898e+06	1.7683e+06	1.79979e+06	1.69052e+06	1.31303e+06	1.718e+06	1.88165e+06	645041	1.14965e+06	1.43797e+06	1.12773e+06	1.93674e+06	1.37795e+06	1.59882e+06
2.25_148.0526n	166.086	2.24632	pos	3,4-Dihydro-2H-1-benzopyran-2-one	HMDB0036626	65745		C02274	660	119-84-6	Phenylpropanoids and polyketides	3,4-dihydrocoumarins	Unclassified	*	44.2	31.1	M+H, M+NH4, M+H-H2O	C9H8O2	1.04767	8.94065	0.00962506	0.07611	-0.660522	0.632649	452909	715893	432836	366348	406368	372533	581449	521093	489736	898225	700842	482359	1.04463e+06	449623	693910	741658
0.75_539.1381m/z	539.138	0.7523	neg	Phenol glucuronide	HMDB0060014	1825			87235	17685-05-1	Organic oxygen compounds	Organooxygen compounds	Carbohydrates and carbohydrate conjugates	*	37.8	1.97	2M-H	C12H14O7	-4.66745	8.92299	0.0150677	0.0891179	1.40929	2.65607	475430	178998	973217	404867	395199	469995	588025	201324	295382	303158	181507	54297.4	232121	75045.3	72464.9	334390
1.29_536.1620n	559.151	1.28688	pos	1,4-beta-D-Glucan	HMDB0006944	58599		C00760	53477911		Unclassified	Unclassified	Unclassified	*	38.8	3.89	M+Na, M+K, M+H	C18H32O18	5.76943	8.8468	0.00570971	0.0637471	-1.41972	0.373786	164626	440429	233293	148539	72233.8	179485	266169	63210.3	189452	790801	297470	291699	414518	333704	292339	662472
0.73_652.2292m/z	652.229	0.72705	pos	Acacetin 7-(4'''-acetylrutinoside)		48884			44257892		Unclassified	Unclassified	Unclassified	*	36.4	0	M+NH4	C30H34O15	8.79601	8.43456	0.00096544	0.0429044	0.934486	1.91121	424620	222174	540724	331568	465498	453649	242302	412789	525812	266593	283099	126185	282705	163311	192970	240352
10.57_156.9908m/z	156.991	10.5712	pos	Phosphoglycolic acid	HMDB0000816	5780		C00988	529	13147-57-4	Organic acids and derivatives	Organic phosphoric acids and derivatives	Phosphate esters	*	38.4	2.26	M+H	C2H5O6P	7.21163	7.96112	0.00904144	0.0750429	0.462925	1.37833	741571	538020	708741	734441	785952	749915	539166	914983	757797	402947	557760	661684	404064	757072	465135	517478
11.79_549.3798n	550.387	11.7946	pos	LysoPC(20:1(11Z)/0:0)	HMDB0010391	61701	LMGP01050131	C04230	52924051		Lipids and lipid-like molecules	Glycerophospholipids	Glycerophosphocholines	***	75.6	92.3	M+H, M+K, M+Na	C28H56NO7P	0.677179	7.61425	0.00838452	0.0728413	-1.16919	0.444671	167707	377148	146865	133475	101498	264413	301690	102111	123895	638701	374304	220317	383472	214705	291754	516783
4.92_154.0994n	172.133	4.91752	pos	4-Oxo-2-nonenal	HMDB0060285	45397	LMFA06000254		6445537	103560-62-9	Organic oxygen compounds	Organooxygen compounds	Carbonyl compounds	*	44.7	31.9	M+H, M+NH4, M+H-H2O	C9H14O2	0.434269	7.44225	0.00317326	0.0566103	0.422018	1.3398	675817	504416	579225	637049	666105	736160	608210	801903	702069	456399	474239	559844	452395	696367	407802	483868
13.12_738.5421m/z	738.542	13.1211	pos	PC(P-18:1(11Z)/14:0)	HMDB0011269	62089	LMGP01030133		53480729		Lipids and lipid-like molecules	Glycerophospholipids	Glycerophosphocholines	*	37.3	0	M+Na	C40H78NO7P	1.81741	7.0183	0.002523	0.052445	0.483336	1.39797	507170	362790	584328	530559	464411	488445	445678	553644	483124	264039	356679	304465	306681	529040	389807	388816
0.69_203.1504m/z	203.15	0.69025	pos	Asymmetric dimethylarginine	HMDB0001539	6309		C03626	123831	30315-93-6	Organic acids and derivatives	Carboxylic acids and derivatives	Amino acids, peptides, and analogues	***	56.2	88.3	M+H	C8H18N4O2	0.908055	6.9996	0.0157025	0.0905916	-1.68336	0.311356	71038	228157	41935.7	81445.9	56195	66489.6	142789	43253.4	65157.3	395237	100797	146153	460597	101988	172162	220161
1.11_132.0247n	150.059	1.11178	pos	TETRAHYDRO-2-THIOPHENECARBOXYLIC ACID		330161		C11074	443066		Unclassified	Unclassified	Unclassified	*	53	74	M+H, M+NH4	C5H8O2S	1.53663	6.8726	4.76726e-05	0.020372	-0.988073	0.504151	118404	234859	115900	103628	130466	94372.7	141008	117766	125690	245736	249280	214037	300587	183558	278032	172785
0.77_116.0710m/z	116.071	0.76685	pos	L-Proline	HMDB0000162	29		C00148	145742	147-85-3	Organic acids and derivatives	Carboxylic acids and derivatives	Amino acids, peptides, and analogues	***	55.6	74.8	M+H	C5H9NO2	3.01056	6.81867	0.00399986	0.0585432	-1.00932	0.496779	143788	289440	137482	98146	118913	128018	134138	161471	228345	410545	229565	223353	419303	152295	265449	325568
10.80_295.2513n	318.241	10.805	pos	(4E,8E,10E-d18:3)sphingosine		53913	LMSP01080013		42608349		Lipids and lipid-like molecules	Sphingolipids	Sphingoid bases	*	46.8	39.7	M+H, M+Na	C18H33NO2	0.618903	6.80127	0.00393168	0.0580903	0.585312	1.50036	416845	277829	404173	418191	450953	425438	274195	520591	424375	209511	292698	350348	192343	390886	244779	264240
2.27_324.2172m/z	324.217	2.26825	pos	Phthalsaurediethylhexylester	HMDB0256506				21895657		Benzenoids	Benzene and substituted derivatives	Benzoic acids and derivatives	*	42.2	15.5	M+NH4	C18H26O4	0.943471	6.33366	0.000832458	0.0414332	0.680461	1.60265	298420	186204	259331	261684	311692	313245	234270	370510	338206	148010	170669	210466	148667	277192	156709	191713
3.71_187.0636n	188.071	3.71483	pos	Indoleacrylic acid	HMDB0000734	5702			5375048	29953-71-7	Organoheterocyclic compounds	Indoles and derivatives	Indoles	*	44.9	32.5	M+H, M+NH4, M+H-H2O	C11H9NO2	1.24433	6.25986	0.00708277	0.0684563	-0.624817	0.648502	240103	370242	258411	152781	233540	215827	189974	326011	304175	459370	366273	315862	486564	226800	360431	376394
7.50_187.1264m/z	187.126	7.49575	pos	5-Ethyl-2-methyl-4-propylthiazole	HMDB0040078	94619			588155	4276-67-9	Organoheterocyclic compounds	Azoles	Thiazoles	*	38.1	5.1	M+NH4	C9H15NS	0.565029	6.2222	0.00567219	0.0636424	-6.7992	0.00897917	1023.92	114033	922.585	883.066	1125.8	1066.1	822.396	1195.8	1151.69	17980.2	41878.5	238515	118305	206377	149364	25809.3
0.71_162.1126m/z	162.113	0.708033	pos	L-Carnitine	HMDB0000062	52		C00318		541-15-1	Organic nitrogen compounds	Organonitrogen compounds	Quaternary ammonium salts	***	57.7	90.5	M+H	C7H15NO3	0.500042	6.19512	0.00775375	0.0709682	0.50052	1.41472	453802	320771	459310	350104	454754	516186	403683	404561	588013	289012	268787	404435	259231	455513	281014	287403
0.71_260.0294n	259.022	0.71145	neg	Glucose 6-phosphate	HMDB0001401			C00092	5958	56-73-5	Organic oxygen compounds	Organooxygen compounds	Carbohydrates and carbohydrate conjugates	***	59.2	78.1	M-H, 2M-H, M-H2O-H	C6H13O9P	-1.06892	6.12633	0.0223744	0.104447	-0.913386	0.530937	148156	279046	47419.2	164101	85659.1	305600	276618	87932.8	69760.3	245017	286335	390898	241016	388570	202253	199231
11.34_296.1625n	279.159	11.3373	pos	Ovalicin	HMDB0038120			C09674	284995	19683-98-8	Organic oxygen compounds	Organooxygen compounds	Alcohols and polyols	*	41.5	17.2	M+H-H2O, M+H	C16H24O5	0.459496	6.11315	0.0117787	0.0819055	0.501743	1.41592	429397	303263	387618	364246	486365	413753	316140	479473	558185	206510	280124	373504	251710	432085	283585	295323
0.77_205.1315n	188.128	0.76685	pos	Pantothenol	HMDB0304820						Lipids and lipid-like molecules	Fatty Acyls	Fatty amides	*	41.5	10.6	M+H-H2O, M+H, M+K	C9H19NO4	0.624852	5.73607	0.00946304	0.0758653	-1.07719	0.47395	104830	221183	93806	121206	61530.9	148325	105115	72676.9	131148	407206	148594	161793	236169	138887	186556	269077
12.59_854.5675m/z	854.567	12.5869	pos	PE(22:0/18:1(12Z)-O(9S,10R))	HMDB0283770						Unclassified	Unclassified	Unclassified	*	37.6	0	M+K	C45H86NO9P	0.346571	5.7253	0.014494	0.08791	0.666021	1.58669	304231	191740	287257	414475	190870	261334	294413	328879	352393	40414.9	205966	231414	191824	273084	157084	242390
10.13_414.2044n	437.194	10.1273	pos	Clausarinol	HMDB0041407	95806			15293564		Phenylpropanoids and polyketides	Coumarins and derivatives	Pyranocoumarins	*	41.2	10.7	M+H, M+NH4, M+Na, M+H-H2O	C24H30O6	0.334479	5.57906	0.00958626	0.0761025	0.324512	1.25224	487866	389594	439125	429156	554345	564144	379073	537213	512002	350482	396936	401956	342865	463916	350566	420438
10.82_566.3460m/z	566.346	10.8233	neg	LysoPC(0:0/18:1(9Z))	HMDB0061701	40348	LMGP01050082		24779494	22248-65-3	Lipids and lipid-like molecules	Glycerophospholipids	Glycerophosphocholines	***	69.2	99.2	M+FA-H	C26H52NO7P	-0.609761	5.39986	0.0123346	0.0832429	-1.58209	0.333998	45375	135854	33236.8	12591.4	18625.3	48722.2	114153	21544.4	68752.6	219056	102524	74054.9	202251	71282	216600	65210.8
11.95_809.5786n	790.561	11.948	neg	PI-Cer(d18:0/18:0)		103136					Unclassified	Unclassified	Unclassified	*	36.7	0	M-H2O-H, M-H	C42H84NO11P	0.513349	5.39805	0.0295525	0.11759	0.991586	1.98837	213149	107198	259392	222192	194769	176370	177197	401851	60270.9	65882.8	99429.7	79417.4	53027.9	170191	114680	167756
10.09_314.2458n	337.235	10.0859	pos	Turneroic acid			LMFA02000385				Lipids and lipid-like molecules	Fatty Acyls	Octadecanoids	*	42.5	15.5	M+Na, M+K, M+NH4, M+H-H2O	C18H34O4	0.336591	5.36501	0.0306194	0.119196	0.832089	1.78026	234612	131785	228642	272317	315952	119710	164313	231748	309601	305721	167175	109873	52805.1	99014.2	94634.7	93272.4
12.59_848.5390m/z	848.539	12.5869	pos	PGP(a-13:0/i-21:0)	HMDB0116527				131823182		Lipids and lipid-like molecules	Glycerophospholipids	Glycerophosphoglycerophosphates	*	37.1	0	M+NH4	C40H80O13P2	-2.75549	5.34638	0.035186	0.127303	0.716043	1.64267	286109	174173	247949	411973	323256	290139	213019	261194	255233	106136	22701	148976	110518	243140	326611	261129
4.63_186.1135m/z	186.113	4.62695	neg	7-oxo-8-amino-nonanoic acid			LMFA01060168	C01092	173		Lipids and lipid-like molecules	Fatty Acyls	Fatty Acids and Conjugates	*	55	85.8	M-H	C9H17NO3	-0.505146	5.30801	0.0377686	0.132048	0.457314	1.37298	422997	308086	414246	462390	535985	427547	317928	504321	298565	198488	309763	391048	244480	475457	277593	259775
0.75_541.1349m/z	541.135	0.7523	neg	Ciadox	HMDB0250601				135565684		Organoheterocyclic compounds	Diazanaphthalenes	Benzodiazines	*	38.4	0	2M-H	C12H9N5O3	2.07623	5.16652	0.0157608	0.090755	1.43239	2.69894	159337	59036.9	326395	134116	132290	159974	204069	65000.2	93515	101023	60988.2	18007.3	76443.7	23490.1	22588.2	110718
12.03_262.2298n	280.264	12.0291	pos	2-(5,8-Tetradecadienyl)cyclobutanone	HMDB0037519	92389			101929256	152245-81-3	Organic oxygen compounds	Organooxygen compounds	Carbonyl compounds	*	51.7	65.2	M+H, M+NH4, M+H-H2O	C18H30O	0.471726	5.00657	0.0252881	0.109674	0.332283	1.259	456123	362289	400727	442975	451086	541745	414882	450853	490594	239195	364515	433268	312984	496910	314488	374663
0.71_183.0661n	184.073	0.708033	pos	Phosphorylcholine	HMDB0001565	6326		C00588	1014	3616-04-4	Organic nitrogen compounds	Organonitrogen compounds	Quaternary ammonium salts	***	55.4	84.3	M+H, M+Na	C5H14NO4P	0.572187	4.97748	0.0464475	0.146581	0.382383	1.30349	541036	415066	511690	427421	466230	654199	492484	585673	649554	329780	253095	536912	404222	547794	518937	314724
0.82_209.0666m/z	209.067	0.816917	neg	L-Fucose	HMDB0000174	63169		C01019	439554	6696-41-9	Organic oxygen compounds	Organooxygen compounds	Carbohydrates and carbohydrate conjugates	***	51.2	57.1	M+FA-H	C6H12O5	-0.399442	4.93684	1.12255e-06	0.00437318	3.13002	8.75444	68885.8	7868.67	48785.9	96140.3	74428.1	69553.8	48939.9	66201.7	78151.1	1919.81	5184.86	8005.11	21992.2	6207.95	8623.42	3147.39
0.61_186.1007n	204.134	0.609217	pos	Prolyl-Alanine	HMDB0029010	85908			418041		Organic acids and derivatives	Carboxylic acids and derivatives	Amino acids, peptides, and analogues	*	51.2	65.6	M+NH4, M+Na, M+H	C8H14N2O3	1.13276	4.8947	0.0176273	0.0958237	-0.68202	0.623292	121116	194316	106826	100445	108703	142581	129170	94979.2	165105	223221	126123	187984	323248	196753	154098	148786
1.16_118.0422n	136.076	1.15645	pos	Benzofuran	HMDB0032929	70116		C14512	9223	271-89-6	Organoheterocyclic compounds	Benzofurans	Unclassified	*	52.1	64.6	M+H, M+NH4	C8H6O	2.73967	4.88297	0.00104835	0.0434424	-1.09788	0.467204	57195	122420	49403.6	42215.3	46145.6	48600.9	89716.3	61146.1	63137	150913	97904	98928.4	185166	75461.7	123775	124791
10.44_200.2010m/z	200.201	10.4438	pos	Dodecanamide	HMDB0251566	36671	LMFA08010001	C13831	14256		Lipids and lipid-like molecules	Fatty Acyls	Fatty amides	*	45	27.6	M+H	C12H25NO	0.647598	4.822	0.0120242	0.0823788	0.579833	1.49468	236333	158117	237291	225519	232481	242732	177828	303009	235472	115542	149339	173195	116833	284996	122494	144415
0.63_146.1057n	147.113	0.628083	pos	L-Lysine	HMDB0000182	5200		C00047	5962	56-87-1	Organic acids and derivatives	Carboxylic acids and derivatives	Amino acids, peptides, and analogues	***	59.7	98.7	M+H-H2O, M+H	C6H14N2O2	1.49791	4.76346	0.0211587	0.1019	0.462632	1.37805	352163	255551	372096	260732	362185	327164	266058	385337	491566	266237	221789	284221	361443	227335	234155	193676
0.71_666.2215n	711.22	0.71145	neg	Stachyose	HMDB0003553	6951		C01613	439531	470-55-3	Organic oxygen compounds	Organooxygen compounds	Carbohydrates and carbohydrate conjugates	***	53	70.7	M-H, M+FA-H	C24H42O21	-0.495555	4.69475	0.0166402	0.0930564	1.13018	2.18886	147564	67415.9	225168	152741	113744	149671	208024	59208.8	124392	136053	58354.3	16391.7	76797.5	24543.9	24788.2	134983
13.18_698.5232n	716.557	13.1825	pos	PA(P-20:0/17:2(9Z,12Z))		82306	LMGP10030066		52929721		Lipids and lipid-like molecules	Glycerophospholipids	Glycerophosphates	*	49	55.7	M+NH4, M+Na	C40H75O7P	-2.61874	4.61737	0.0262003	0.111711	0.487984	1.40248	285866	203828	286882	227265	319719	320260	223314	303086	320533	81913.1	171343	218162	183314	328147	231178	212740
12.14_318.2772n	341.266	12.1388	pos	1-O-(2R-hydroxy-pentadecyl)-sn-glycerol			LMGL01020062		137323863		Lipids and lipid-like molecules	Glycerolipids	Monoradylglycerols	*	41.7	13.6	M+H, M+Na, M+NH4	C18H38O4	0.455153	4.56999	0.000382357	0.0341567	0.662891	1.58325	160630	101456	203069	140400	163430	182879	127247	135461	171922	84541.8	102242	111658	93216.7	131871	86764.3	99895.2
9.25_269.1310m/z	269.131	9.24532	neg	Imazamethabenz-methyl	HMDB0034913	90301		C11494	54744	81405-85-8	Benzenoids	Benzene and substituted derivatives	Benzoic acids and derivatives	*	37.8	0	M-H2O-H	C16H20N2O3	5.20071	4.54157	0.0171229	0.0942705	0.43674	1.35354	280319	207100	280175	294672	330143	275098	213489	336422	232235	147545	213343	242362	166137	304794	190280	185243
1.40_86.0971m/z	86.0971	1.39708	pos	Piperidine	HMDB0034301	64457		C01746	8082	110-89-4	Organoheterocyclic compounds	Piperidines	Unclassified	*	52.7	77.4	M+H	C5H11N	7.52104	4.51766	0.014986	0.0889213	-0.642764	0.640485	129009	201424	109515	100867	130975	116694	118639	160810	165563	282110	188407	149245	276477	109098	198753	205878
0.75_427.0298n	428.037	0.745533	pos	ADP	HMDB0001341	6175		C00008	6022	58-64-0	Nucleosides, nucleotides, and analogues	Purine nucleotides	Purine ribonucleotides	***	61.2	95.5	M+H, M+Na	C10H15N5O10P2	0.925282	4.5134	0.0340157	0.125468	1.74734	3.35739	111924	33336.7	35407.6	97790.8	142668	103938	34175.3	281741	87748.1	14850.6	30253.1	54203.7	19329	72140.3	25056.7	17523.2
0.83_250.0667n	233.063	0.82825	pos	2-[(5-Methylsulfinyl)-4-penten-2-ynylidene]-1,6-dioxaspiro[4.4]non-3-ene	HMDB0032670	88611			14540702		Organic oxygen compounds	Organooxygen compounds	Ethers	*	37.4	0.0827	M+H-H2O, M+NH4	C13H14O3S	1.4574	4.50009	0.000247983	0.0313123	2.22373	4.67099	71151.9	15232.7	40031.2	83499.3	58659.2	81150.2	52665.6	57171.1	124887	8666.86	12480.4	17124	21955.6	22915.7	11157.3	12329.2
14.54_136.0216m/z	136.022	14.5402	pos	1,2-Benzisothiazole	HMDB0244057				9225		Organoheterocyclic compounds	Benzothiazoles	Unclassified	*	40.3	5.34	M+H	C7H5NS	0.656775	4.40509	0.0182879	0.096985	0.279305	1.21361	384526	316845	355097	358452	398002	399673	329334	438713	412410	291147	315842	371816	260957	405715	269956	302479
12.53_256.2635m/z	256.264	12.5259	pos	Palmitic amide	HMDB0012273	62905	LMFA08010009		69421	629-54-9	Lipids and lipid-like molecules	Fatty Acyls	Fatty amides	***	45.5	34.3	M+H	C16H33NO	0.0748583	4.38973	0.00528315	0.0625585	0.361066	1.28437	285574	222344	250878	251976	317571	341352	257619	286771	292848	181410	212077	236105	214971	289767	196766	225315
0.71_119.0587n	120.066	0.708033	pos	L-Homoserine	HMDB0000719	5687		C00263	12647	672-15-1	Organic acids and derivatives	Carboxylic acids and derivatives	Amino acids, peptides, and analogues	***	58.6	79.1	M+H-H2O, M+H	C4H9NO3	3.96484	4.37097	0.00071586	0.0400459	-0.68031	0.624031	92827.6	148755	77619.4	71321.6	111872	78968.3	76759.3	120036	113216	185226	134663	126860	177327	117898	146370	152939
4.70_182.0579n	163.04	4.70173	neg	Isohomovanillic acid	HMDB0000333	5322			160562	1131-94-8	Benzenoids	Phenols	Methoxyphenols	**	43.5	0	M-H2O-H, M-H	C9H10O4	-0.237707	4.35266	0.00383809	0.0577402	-1.58442	0.333458	30336.3	90974.8	22598.1	19592.8	19760.8	43431.8	30288.5	23130.4	53551.7	167852	62816	75677.2	110342	34271.7	76822.4	109042
3.89_333.1726n	356.162	3.89272	pos	(alphaS,betaS)-alpha-Ethyl-alpha-(4-methoxyphenyl)-beta-phenyl-2-pyridineethanol		70922		C15458	11954179		Unclassified	Unclassified	Unclassified	*	44.9	34.2	M+H, M+Na, M+K	C22H23NO2	-0.819383	4.30305	0.0384182	0.133067	0.826862	1.77382	180475	101744	91658.1	144622	273368	177490	123415	171713	281062	50158	86430.2	196189	83779.6	152379	85510.6	57760.3
6.68_211.1573n	234.147	6.67698	pos	Elaeokanine C		329845		C10592	442855	33023-03-9	Unclassified	Unclassified	Unclassified	*	39.5	0.263	M+Na, M+K, M+H	C12H21NO2	0.418704	4.17252	0.00158227	0.0479415	0.413159	1.3316	197042	147974	168984	191650	195992	198369	177159	234669	212472	127323	155412	168883	121982	182804	127008	152406
10.53_293.2357n	316.225	10.5258	pos	2'-hydroxy-N-(isobutyl)-tetradeca-2E,4E,8Z-trienamide			LMFA08020322		5316694		Lipids and lipid-like molecules	Fatty Acyls	Fatty amides	*	40.2	7.25	M+H, M+Na	C18H31NO2	0.703421	4.15208	0.00417905	0.0593576	0.537255	1.45121	167936	115721	162517	168048	176717	170361	119044	201968	176897	84216.8	121263	139318	84894.3	168113	103800	108446
9.86_437.1937m/z	437.194	9.8555	pos	Armillaripin	HMDB0030404	86949			21124297	129741-56-6	Lipids and lipid-like molecules	Prenol lipids	Sesquiterpenoids	*	46.5	37.4	M+Na	C24H30O6	0.554992	4.12202	0.0289211	0.116999	0.321895	1.24997	330462	264375	264400	328136	315669	360335	298231	427550	318912	204630	250606	245911	254770	355874	293010	245829
11.58_481.3172n	482.324	11.58	pos	LysoPE(18:0/0:0)	HMDB0011130	40775	LMGP02050001		9547068	69747-55-3	Lipids and lipid-like molecules	Glycerophospholipids	Glycerophosphoethanolamines	***	68.7	97.8	M+H, M+Na	C23H48NO7P	0.797026	4.11882	0.0499904	0.15172	-0.785081	0.580319	90154.4	155353	74118.8	69754.3	55728.3	110887	198899	51144.9	70548.6	255310	108673	138935	201536	156472	71621.3	154925
4.70_231.0273m/z	231.027	4.70173	neg	Sodium (4-methoxybenzoyloxy)acetate	HMDB0303300				56844155		Benzenoids	Benzene and substituted derivatives	Benzoic acids and derivatives	*	39.5	0	M-H	C10H9NaO5	-0.628215	4.04989	0.00231073	0.0513901	-2.01163	0.247992	16704.9	67360.5	10874.4	6773.14	6774.85	29673	18598.9	9982.21	34257.7	123361	45884.1	55689.8	83640.9	21042	57813.2	84093.1
9.50_315.2776n	338.267	9.4962	pos	Dehydrophytosphingosine	HMDB0038057				14757419	3687-54-5	Organic nitrogen compounds	Organonitrogen compounds	Amines	***	62.9	45.4	M+H-H2O, M+H, M+Na	C18H37NO3	0.665174	3.99529	0.000319417	0.0339275	0.484694	1.39929	147540	105439	145467	132571	165440	136352	127325	179122	146502	92666.1	111112	108562	94837.3	124773	92643.8	113480
1.00_437.0322n	482.03	0.997533	neg	tigemonam	HMDB0259088				59717		Organoheterocyclic compounds	Lactams	Beta lactams	*	37.4	2.6	M+FA-H, 2M-H, M-H	C12H15N5O9S2	2.54178	3.96759	0.0352491	0.127353	0.960826	1.94642	131317	67465.8	61477	158734	184684	140385	107667	193229	73043.1	3296.44	93071	109958	28863.3	131036	80847.3	25188.9
1.11_244.0694n	243.062	1.1114	neg	Uridine	HMDB0000296	90		C00299	6029	58-96-8	Nucleosides, nucleotides, and analogues	Pyrimidine nucleosides	Unclassified	***	64.1	94.3	M-H, M+FA-H	C9H12N2O6	-0.694921	3.94884	0.0173505	0.0950492	0.735164	1.66459	139209	83629.5	162575	148769	188375	129495	101508	140909	102829	35522.3	123800	134952	36901.4	124111	71707.4	58412.7
12.16_362.3034n	385.293	12.1614	pos	Tetraethylene glycol monododecyl ether	HMDB0246913	350763			78933		Organic oxygen compounds	Organooxygen compounds	Ethers	*	45.8	33.8	M+NH4, M+Na, M+H	C20H42O5	0.420303	3.84671	0.00207152	0.0501279	1.03437	2.04822	93524.4	45661.4	145072	81592.9	96712.5	115717	67883.9	50333.5	97358.8	33703.5	44648.1	46319	59280.7	53817.4	38491.9	43369.2
14.54_142.0744n	125.071	14.5402	pos	Piracetam	HMDB0256585	44173			4843	7491-74-9	Organic acids and derivatives	Carboxylic acids and derivatives	Amino acids, peptides, and analogues	*	43	19.7	M+H-H2O, M+H	C6H10N2O2	1.37795	3.81427	0.00985571	0.0766783	0.3385	1.26444	229156	181231	208449	215233	237428	240768	196748	260498	244972	162232	175456	216182	143341	240236	156778	174396
10.57_320.2562m/z	320.256	10.5712	pos	(4E,8Z,d18:2) sphingosine		53911	LMSP01080011		11993697		Lipids and lipid-like molecules	Sphingolipids	Sphingoid bases	*	43	19.2	M+Na	C18H35NO2	0.595379	3.76247	0.00516788	0.0624877	0.532517	1.44645	141715	97974.2	138924	136284	156628	138390	99795.6	174679	147302	69381.4	103656	121462	73906.8	138325	87159	91929.2
1.65_310.1764m/z	310.176	1.64745	pos	Pro-Pro-Pro	HMDB0256689				4475718		Organic acids and derivatives	Carboxylic acids and derivatives	Amino acids, peptides, and analogues	*	47.2	41.7	M+H	C15H23N3O4	0.876815	3.75718	0.000849798	0.0414332	-1.76786	0.293644	15772.5	53712.8	12809.4	21833.7	10496.1	13890.6	28919.9	6826.07	15631.5	76543	26667	51893.7	82949	28187.5	52293.9	57455.3
0.79_324.0356n	323.028	0.794883	neg	Uridine 5'-monophosphate	HMDB0000288			C00105	6030	58-97-9	Nucleosides, nucleotides, and analogues	Pyrimidine nucleotides	Pyrimidine ribonucleotides	***	64.8	87.5	M-H, 2M-H	C9H13N2O9P	-0.686897	3.73458	0.0248425	0.109162	1.76277	3.3935	72641.5	21406.1	103972	29472.5	77269.1	39385.2	23320.7	172521	62549.6	32340.3	28307.2	19675.7	15768.6	11915.7	21990.9	19844.4
1.00_715.1007m/z	715.101	0.997533	neg	Myricetin 3,7-diglucuronide			LMPK12112443		102274234		Lipids and lipid-like molecules	Polyketides	Flavonoids	*	43.9	29.2	M+FA-H	C27H26O20	1.11788	3.73401	0.0225918	0.104736	1.4292	2.69297	83214.1	30900.5	12191.3	94652	124101	92407.5	61588.9	145754	51804.4	2.41397e-06	46337.8	53739	5618.79	66481.2	41243.3	2883.04
0.73_990.3273n	991.335	0.72705	pos	Pgg-glucan	HMDB0256373						Organic oxygen compounds	Organooxygen compounds	Carbohydrates and carbohydrate conjugates	*	37.5	0	M+H-H2O, M+H	C36H62O31	-0.217722	3.71972	0.037611	0.131763	1.83518	3.56815	81973.3	22973.6	180935	42152.2	42960	66103	123345	4168.05	114150	69861.8	6574.39	2.41397e-06	30425.7	2.41397e-06	2361.59	51591.8
9.86_414.2044n	453.168	9.8555	pos	19-oxodesacetylcinobufagin			LMST01130017		11144140		Lipids and lipid-like molecules	Steroids and steroid derivatives	Sterols	*	41.1	7.53	M+H, M+K, M+NH4, M+H-H2O	C24H30O6	0.297805	3.70962	0.0250532	0.109378	0.338239	1.26421	254061	200964	199675	255388	243904	274400	230995	333606	240458	163207	185612	183961	197171	270255	223096	183443
0.59_575.2662m/z	575.266	0.58995	pos	Pheophorbide a	HMDB0256449						Unclassified	Unclassified	Unclassified	*	47.2	57.8	M+H-H2O	C35H36N4O5	1.55295	3.68726	0.00285873	0.05547	1.73053	3.31849	61658.5	18580.3	99269.3	42796.5	51952.1	63721.2	58514.9	20186.5	95169.4	29980.8	18541.8	4458.89	31219.9	7030.36	8284.49	30546.1
8.05_273.2668n	274.274	8.05053	pos	C16 Sphinganine		41556	LMSP01040001	C13915	656816		Lipids and lipid-like molecules	Sphingolipids	Sphingoid bases	*	54.7	76.7	M+H, M+Na	C16H35NO2	0.244213	3.65817	0.0126861	0.0843781	0.379683	1.30106	179663	138090	167192	155013	196348	203694	140926	160926	233544	124819	141974	137304	110891	147967	133203	170474
0.82_363.0579n	362.051	0.816917	neg	Guanosine monophosphate	HMDB0001397	6216		C00144	6804	85-32-5	Nucleosides, nucleotides, and analogues	Purine nucleotides	Purine ribonucleotides	***	60	82.9	M-H, 2M-H	C10H14N5O8P	-0.269119	3.57596	0.0416185	0.138839	0.606625	1.52269	158261	103935	167077	175016	196219	189373	88125.9	177279	114736	35772.6	106247	133321	78341.9	182448	122318	69095.9
0.69_132.0537n	133.061	0.69025	pos	L-Asparagine	HMDB0000168	14		C00152	6267	70-47-3	Organic acids and derivatives	Carboxylic acids and derivatives	Amino acids, peptides, and analogues	***	58.4	86.3	M+H, M+Na	C4H8N2O3	1.2166	3.55256	2.76622e-05	0.0150955	-1.13516	0.455286	26510.3	58227.8	22404.2	21494.9	28955.9	25934.3	30882.1	27064.2	28836.3	79817.9	45601	55150.7	70232.4	49384.7	50861	56546.7
7.79_198.1733n	199.181	7.78575	pos	Cycluron		72851		C19109	16554	2163-69-1	Unclassified	Unclassified	Unclassified	*	40.7	6.8	M+H, M+Na	C11H22N2O	0.581977	3.5315	0.000253271	0.031511	-4.57935	0.041829	1358.66	32481.3	1291.33	1313.93	1392.38	1261.15	1126.91	1534.81	1590.09	14723	13697.5	54100.4	44897.5	35981.4	43148.6	20820.5
11.25_297.2669n	320.256	11.2543	pos	2S-amino-octadeca-4E,6E-diene-1,3R-diol		53959	LMSP01080059		42608376		Lipids and lipid-like molecules	Sphingolipids	Sphingoid bases	*	47.7	44	M+Na, M+K	C18H35NO2	0.480254	3.5054	0.020346	0.100532	0.334905	1.26129	214393	169978	193096	200634	222594	240315	180237	242562	221312	144537	183936	213818	127618	222438	150367	147135
11.52_421.2594m/z	421.259	11.5184	neg	5alpha-Androstane-3beta,17beta-diol diacetate		70819		C15346	224008		Unclassified	Unclassified	Unclassified	*	39.2	0	M+FA-H	C23H36O4	-0.462381	3.47418	0.0109417	0.0797321	-1.43668	0.369417	22298.9	60362.4	17239.5	8231.12	18399.9	39308	40580.5	13139.5	19193.9	102971	47058.9	29205.2	93518	25814.8	78057.5	45912
7.10_386.2070n	387.214	7.10393	pos	Euglobal IIc	HMDB0030036	86678			73076025	77794-62-8	Organoheterocyclic compounds	Benzopyrans	1-benzopyrans	*	38.1	6.88	M+H, M+Na	C23H30O5	-5.96234	3.45112	0.0490337	0.150433	0.244679	1.18483	275271	232330	228753	241342	290932	283637	245736	337748	298750	239229	239375	254302	185140	266989	182472	258802
9.51_294.1470n	317.136	9.50793	pos	Mono-(2-ethyl-5-hydroxyhexyl) phthalate	HMDB0094679				170295		Benzenoids	Benzene and substituted derivatives	Benzoic acids and derivatives	*	43.8	23	M+H-H2O, M+Na, M+H	C16H22O5	0.809669	3.436	0.0459744	0.145906	2.06697	4.19005	65313.5	15587.7	15802.8	30726.9	48045.1	99225	25419.8	56841	181134	3709.29	7423.44	33749.3	14777.4	26632.3	18408	4414.33
11.52_376.2615n	377.269	11.5213	pos	MG(0:0/20:5(5Z,8Z,11Z,14Z,17Z)/0:0)	HMDB0011550	62333	LMGL01010026		11660820		Lipids and lipid-like molecules	Endocannabinoids	Unclassified	*	53.4	71.8	M+H, M+Na, M+H-H2O	C23H36O4	0.423895	3.3624	0.0153414	0.089853	-1.39934	0.379103	22756.6	60027.5	17683.5	8717.64	14310.4	41736.3	41611	7803.1	27434	113251	39807	34168.6	75817.6	29082.2	85366.4	42699
13.26_247.1666m/z	247.167	13.2562	pos	S-cucujolide III		97400	LMFA07040046		10867948		Lipids and lipid-like molecules	Fatty Acyls	Fatty esters	*	48.8	50.7	M+Na	C14H24O2	-0.996352	3.33146	0.0132377	0.085432	0.385787	1.30657	159494	122070	144612	150169	167731	163063	129605	184019	177257	101852	119316	151226	94048.3	169805	101636	116610
8.22_198.1257n	181.122	8.22163	pos	7-hydroxy-2,4,7-trimethyl-2E,4E-octadienoic acid			LMFA01031268				Lipids and lipid-like molecules	Fatty Acyls	Fatty Acids and Conjugates	*	47.1	38.1	M+H-H2O, M+Na, M+H	C11H18O3	0.542599	3.31723	0.00903485	0.0750429	0.35676	1.28055	182356	142405	197178	179138	165369	193265	182890	218647	140002	179538	114050	124857	159337	141429	125001	152620
4.64_152.0839n	170.118	4.64248	pos	2,6,6-Trimethyl-2-cyclohexene-1,4-dione	HMDB0040216	94747			62374	1125-21-9	Organic oxygen compounds	Organooxygen compounds	Carbonyl compounds	*	49.1	50	M+H, M+NH4, M+H-H2O	C9H12O2	0.890167	3.28405	0.0198653	0.0999269	0.311506	1.241	202156	162897	192466	184560	216068	219807	166598	229295	206296	144742	151658	181696	141486	227427	139780	153490
1.29_407.0817m/z	407.082	1.28923	neg	7-O-Galloyl-sedoheptulose	HMDB0247276				74833049		Organic oxygen compounds	Organooxygen compounds	Carbohydrates and carbohydrate conjugates	*	41.8	16.3	M+FA-H	C14H18O11	-3.87274	3.24367	0.000486306	0.0359289	-1.43832	0.368996	17560.9	47591	31424.4	20310.8	15664.8	11490.3	24982.5	11225.3	7828.12	39514.5	32306.2	62859.4	40929.4	66847.9	33020.2	57659.5
0.83_215.0796n	216.087	0.82825	pos	Succinylproline		339501		C11711	194156	63250-32-8	Unclassified	Unclassified	Unclassified	*	44.9	30.5	M+H-H2O, M+H	C9H13NO5	0.96604	3.18673	0.00907094	0.0750715	-2.81894	0.141715	6129.82	43254.6	6738.23	4169.43	1250.53	12172.2	11875	2004.79	4698.61	98351.3	37044.8	18176.9	49398.9	6951.75	26418.4	66440.4
11.34_301.1412m/z	301.141	11.3373	pos	Glyceryl 5-hydroxydecanoate	HMDB0032297	88341			5463954	26446-31-1	Lipids and lipid-like molecules	Fatty Acyls	Fatty alcohols	*	39.2	4.07	M+K	C13H26O5	-0.0793662	3.16939	0.0106171	0.0792802	0.593399	1.5088	100476	66593.5	89351	85835.9	111004	91464.7	74849.3	110254	140573	40795.6	61442.1	79735	55032	103197	66439.4	59513.5
1.29_385.0999m/z	385.1	1.28923	neg	3'-Ketolactose	HMDB0001030	58015		C05403	440659	15990-62-2	Organic oxygen compounds	Organooxygen compounds	Carbohydrates and carbohydrate conjugates	*	42.1	17.1	M+FA-H	C12H20O11	3.23957	3.16808	7.73308e-07	0.00437318	-1.91591	0.265005	8960.56	33812.8	17961.6	8039.6	8410.23	7197.11	6848.55	6566.67	7700.12	31676.8	25253.7	37112.1	36772.1	33047	29675.7	43152.2
13.23_873.5398m/z	873.54	13.2349	pos	PG(P-20:0/22:6(4Z,7Z,10Z,13Z,16Z,19Z))		79997	LMGP04030093		52927433		Lipids and lipid-like molecules	Glycerophospholipids	Glycerophosphoglycerols	*	37.1	0	M+K	C48H83O9P	-0.951916	3.15764	0.00248049	0.0520461	0.943966	1.92381	60137.7	31259.7	61069.1	69621	70085	63528.8	39349.4	56447	60863.3	6522.15	27089.5	28796.2	17023.7	58883.4	39408.1	41094.7
0.71_273.0379m/z	273.038	0.71145	neg	Heptulose	HMDB0302552				124823		Organic oxygen compounds	Organooxygen compounds	Carbohydrates and carbohydrate conjugates	*	51.9	62.3	M-H	C7H15O9P	-0.553678	3.15175	0.00669337	0.0671118	-1.0233	0.491989	33679.2	68455.2	30220.5	28871.2	21923.5	60121.6	31593.7	29972	33051.9	59028.1	71094.3	42269.7	87436.6	31678.9	87760	99919
3.71_282.1820n	283.189	3.71483	pos	Fumagillol	HMDB0252515				219089		Organic oxygen compounds	Organooxygen compounds	Alcohols and polyols	*	38.6	10.6	M+H, M+Na	C16H26O4	-4.05813	3.08113	0.000231236	0.0309861	-1.45835	0.36391	14207	39039.8	14524.2	16340.9	11735.3	7019.54	27212.3	7335.72	15280.8	45104.2	36146.8	42076.2	45256.4	18080.8	51003.9	35610.2
12.11_494.3821n	512.416	12.1077	pos	Heptaethylene glycol monododecyl ether	HMDB0251574	347359			76459		Organic oxygen compounds	Organooxygen compounds	Ethers	*	42.9	18.2	M+NH4, M+Na, M+H	C26H54O8	0.490598	3.07929	0.0137547	0.0866256	1.19152	2.28393	68027.8	29785.4	113260	64135.3	81137.3	85281.6	31984.4	23843.8	76552.2	11037.7	25489.2	32793	60335.3	31069.6	32607.2	15165.4
7.54_523.2551n	524.262	7.5384	pos	5,6-dihydro-7-oxo-19,20-epoxycytochalasin C			LMPK11000027				Lipids and lipid-like molecules	Polyketides	Cytochalasins	*	44.3	34.6	M+H, M+Na	C30H37NO7	-3.72938	3.0399	0.0201355	0.10008	1.3648	2.5754	57309.7	22252.7	108170	86069.2	38380.3	24153	53871.8	71579.1	18944.1	13139.2	15756.2	7778.53	32603.4	22856.2	28924.8	34710.7
0.73_721.0955m/z	721.095	0.730267	neg	Glucoputranjivin		328123		C08418	441524	18432-16-1	Unclassified	Unclassified	Unclassified	*	36.6	0	2M-H	C10H19NO9S2	3.46043	3.03943	0.00340542	0.0569514	0.946992	1.92785	56499	29306.8	47841.6	68159.1	85353.2	61550	32802.9	62863	36923.5	27528.8	41789.5	24128.2	26278	25903	23189.7	36330.1
2.94_445.1205m/z	445.12	2.94397	pos	Melithiazol A		71030		C15696	23724543		Unclassified	Unclassified	Unclassified	*	36.8	0	M+Na	C20H26N2O4S2	-5.0932	3.03772	0.00346289	0.0569514	0.479473	1.39423	99548.8	71400.3	88665.3	93895.9	104924	106210	78010.1	116943	108193	59270.4	66420.4	84910.1	57895.9	100156	61593	69556.5
3.89_208.1314n	231.121	3.89272	pos	5S,6S-epoxy-15R-hydroxy-ETE	HMDB0062236				90263		Organic oxygen compounds	Organooxygen compounds	Ethers	*	44.8	27.1	M+Na, M+K, M+H	C9H20O5	1.51421	3.02699	0.0224406	0.104447	0.641104	1.55952	93584.8	60008.6	53861.4	85549.5	118910	105556	85201.7	74525.4	131490	40191.3	52493.8	95217.8	35051.9	74306	54790.5	68009.1
10.94_634.3335m/z	634.334	10.942	neg	Pentasine	HMDB0029803	86510			131750910	108133-63-7	Organic acids and derivatives	Carboxylic acids and derivatives	Pentacarboxylic acids and derivatives	*	38.5	0	M-H2O-H	C30H49N6O10+	0.543019	2.99542	0.0004083	0.0352431	-1.02085	0.492827	22421.4	45495.5	14454.7	16212.8	21045.3	20072.9	40457.9	23247.5	21458.7	56225.1	37046.3	40376.1	59882.6	45770.7	43482.4	35685.3
11.31_536.3713m/z	536.371	11.3062	pos	PC(19:1(9Z)/0:0)		76572	LMGP01050130		52924049		Lipids and lipid-like molecules	Glycerophospholipids	Glycerophosphocholines	*	50.4	58.3	M+H	C27H54NO7P	0.500284	2.89352	0.00820321	0.0724921	-1.54872	0.341813	15552.6	45500.3	14818.5	9465.75	8964.12	19488.9	35690.4	8426.5	12013.7	84598.4	51360.9	21103.7	47296.8	16105.2	40245.7	57791.1
12.59_859.6006m/z	859.601	12.5869	pos	PI-Cer(t18:0/18:0(2OH))		103166					Unclassified	Unclassified	Unclassified	*	36.7	0	M+NH4	C42H84NO13P	-1.52262	2.88978	0.000428989	0.0352823	0.7276	1.65588	58425.9	35283.9	44173.3	41655	64649.8	75294	59005.4	61544.8	62658.9	33925.5	34437.7	31465.6	30644.7	42719.4	32484.1	41310
14.51_162.9823m/z	162.982	14.515	neg	Pentafluoropropionic acid	HMDB0256333	337159			62356		Organohalogen compounds	Alkyl halides	Alkyl fluorides	*	42.7	16.4	M-H	C3HF5O2	-0.414955	2.87384	0.00221231	0.0507534	0.524462	1.4384	80867.8	56220.8	78665.8	83058.4	91813.9	79478.5	66128.2	79349.5	87580.3	38491.7	55720.8	64533.3	44759.6	83942	53562.5	52535.5
12.94_898.5525m/z	898.553	12.9386	pos	PGP(18:0/20:3(8Z,11Z,14Z))	HMDB0013511				53481829		Lipids and lipid-like molecules	Glycerophospholipids	Glycerophosphoglycerophosphates	*	36.3	0	M+NH4	C44H82O13P2	-4.94692	2.87064	0.00110668	0.0436899	1.03512	2.04929	46997.2	22933.4	41889.7	54120.8	59252.4	38771.6	29450.2	48880	56615.7	15976.5	14168.8	29948.2	16874.3	43168.9	21885.2	18512
0.79_136.0618m/z	136.062	0.787683	pos	FAPy-adenine	HMDB0004816	7080		C06502	114926	5122-36-1	Organoheterocyclic compounds	Diazines	Pyrimidines and pyrimidine derivatives	***	51.2	56.4	M+H-H2O	C5H7N5O	0.160448	2.85868	0.0112876	0.08066	0.969206	1.95776	58752.1	30009.8	23354.3	53843	63745.1	68018.8	52806.2	79023.9	70473.6	7815.61	36077	47073.1	17065	55676.2	32426.6	13935.4
1.96_239.1619m/z	239.162	1.95802	pos	11R-hydroxy-dodecanoic acid		35608	LMFA01050253		5312806		Lipids and lipid-like molecules	Fatty Acyls	Fatty Acids and Conjugates	*	39.6	2.99	M+Na	C12H24O3	0.491553	2.84915	0.00148948	0.0475651	0.522916	1.43686	76796.5	53447.6	69761.5	69789.9	81993.5	80559.1	61524.3	91537.7	82409.9	46200.6	49314	61498.5	43828.4	74143.3	44126.6	55021.6
0.71_260.0298n	283.019	0.708033	pos	Fructose 6-phosphate	HMDB0000124	5159		C00085	69507	643-13-0	Organic oxygen compounds	Organooxygen compounds	Carbohydrates and carbohydrate conjugates	***	68	85.9	M+Na, M+K	C6H13O9P	0.268893	2.84378	0.0209469	0.101663	-1.71625	0.30434	12730	41828.1	1801.55	14141	7781.62	24806.4	21021.8	10590.4	8966.91	24491.8	38989.1	77509.2	19717.8	84778.9	30215.2	17094.9
2.25_167.0897m/z	167.09	2.24632	pos	4-Guanidinobutanamide		3269		C03078	123	23256-39-5	Unclassified	Unclassified	Unclassified	*	37.6	0	M+Na	C5H12N4O	-4.28089	2.79907	0.00907919	0.0750715	-0.673551	0.626962	43042.3	68652.1	41149	34743.8	39226.7	34666.4	55848.2	49370.8	46290.8	85804.4	67335.9	46370.1	100576	42948.9	66485.1	71044.5
14.54_230.1170n	231.124	14.5402	pos	Dicyclohexyl disulfide	HMDB0041448	95844			17356	2550-40-5	Organosulfur compounds	Organic disulfides	Dialkyldisulfides	*	36	0	M+H-H2O, M+H	C12H22S2	2.93206	2.78108	0.0167168	0.0932719	0.308619	1.23852	138877	112131	126734	129657	143824	146129	119438	157911	148446	102686	109191	132139	88131.4	149547	96282.1	106942
1.70_519.2909m/z	519.291	1.6968	pos	GS 1500		42540	LMST03020614		24779624		Lipids and lipid-like molecules	Steroids and steroid derivatives	Secosteroids	*	40.2	17.6	M+Na	C31H44O3S	1.06455	2.77493	0.000391096	0.0344227	1.33049	2.51489	35942.6	14291.9	42382.1	31431.7	52048.9	21628.7	26001	44557	33548.8	5662.6	17168.6	18931.7	13000.3	17004.5	16881.9	11393.8
1.49_247.1668m/z	247.167	1.48657	pos	Alepric acid		34858	LMFA01030191		5282854		Lipids and lipid-like molecules	Fatty Acyls	Fatty Acids and Conjugates	*	44	24.7	M+Na	C14H24O2	-0.407171	2.75492	0.00359175	0.0572702	0.526664	1.44059	77190.8	53582.6	67487.7	74701.4	83636.3	84008.6	65325.8	83106.9	82068.9	40516.2	54580.5	68530.5	39696.7	80032.4	44578	47144.1
1.40_133.1054m/z	133.105	1.39708	pos	2-Heptanethiol	HMDB0032303	88347			522071	628-00-2	Organosulfur compounds	Thiols	Alkylthiols	*	36.2	0.809	M+H	C7H16S	6.66221	2.75224	0.0151718	0.0894001	-0.65537	0.634913	46627.7	73439.5	40448.5	36219	47014.3	42770.1	43208	55900.6	60833.1	105000	67525	54000.1	100624	39400.1	72861.9	74664.5
11.36_205.0861m/z	205.086	11.3648	pos	Monoisobutyl phthalic acid	HMDB0002056	58086			92272	30833-53-5	Benzenoids	Benzene and substituted derivatives	Benzoic acids and derivatives	*	49.4	54.8	M+H-H2O	C12H14O4	0.770034	2.71323	0.0113202	0.0806945	0.47475	1.38968	86775.4	62442.8	78686.5	77523.4	97840.7	80658.8	65699.9	101302	105716	41313.4	59225	77401.7	49871.4	87056.7	58589	63642.5
4.28_245.1362m/z	245.136	4.2841	pos	Streptidine	HMDB0258506				201527		Organic oxygen compounds	Organooxygen compounds	Alcohols and polyols	*	42.2	14.9	M+H-H2O	C8H18N6O4	2.17122	2.70695	0.0198804	0.0999269	0.444421	1.36077	92036.4	67635.6	61114.4	90255.2	95558.9	96620.6	86884.1	103555	110266	50302.8	68422.9	89787.9	42131.1	83066.7	57703.4	82034.6
0.73_277.0326m/z	277.033	0.730267	neg	Polyribosylribitolphosphate	HMDB0249913				2219		Organic oxygen compounds	Organooxygen compounds	Carbohydrates and carbohydrate conjugates	*	44.6	25.2	M+FA-H	C5H13O8P	-1.75161	2.7051	0.000161825	0.0281344	-0.594906	0.662087	36553.8	55210	28860.8	35539.2	35501.1	45567.4	49622.2	31367.5	29418.5	59543.9	50060.5	54008.9	57671.8	59982.6	55932.7	49269.3
11.34_383.2042m/z	383.204	11.3373	pos	Isopentenyladenine-9-N-glucoside	HMDB0012240	62882			11675006	83087-94-9	Organic oxygen compounds	Organooxygen compounds	Carbohydrates and carbohydrate conjugates	*	45.7	33.4	M+NH4	C16H23N5O5	1.1439	2.69194	0.013499	0.0860991	0.393702	1.31376	101367	77157.6	96761.6	97192.3	108730	92203	77055.9	114894	122729	56614.5	75278.9	88450.1	63944.9	105411	75520.2	74884
14.79_184.9856m/z	184.986	14.7875	pos	Phosphohydroxypyruvic acid	HMDB0001024	484		C03232	105	3913-50-6	Organic oxygen compounds	Organooxygen compounds	Carbonyl compounds	*	38.7	4.01	M+H	C3H5O7P	5.74017	2.68986	0.00809864	0.0724604	0.35236	1.27665	113221	88686.5	101416	112755	117480	118922	95814.4	127198	118963	76253.1	80551.2	110659	75560.9	116725	79442.9	81613.2
12.21_449.2907m/z	449.291	12.2086	neg	Androstane-3,17-diol dipropionate	HMDB0249623				4556532		Lipids and lipid-like molecules	Steroids and steroid derivatives	Steroid esters	*	40.8	5.65	M+FA-H	C25H40O4	-0.419506	2.668	0.00505945	0.0621698	-1.00077	0.499732	21485.6	42994.3	15957.6	14665	22148.7	36316.9	25305.8	19507.1	16498.4	54222.8	29785.6	25798.9	63312.5	28851.5	53014.1	45974.6
13.44_817.5590n	818.569	13.4412	pos	PC(22:6(4Z,7Z,10Z,13Z,16Z,19Z)/17:1(9Z))		76385	LMGP01012105		52923687		Lipids and lipid-like molecules	Glycerophospholipids	Glycerophosphocholines	*	36.7	0	M+H-H2O, M+H	C47H80NO8P	-3.90074	2.66784	0.013162	0.0853871	0.413686	1.33208	96178.6	72201.5	76951.4	96176.1	108281	111658	75658.1	92278	112247	72528	53716.5	65055.2	63110.3	101805	69895.8	79299.3
0.58_178.9777m/z	178.978	0.57955	neg	Sodium n-alkylbenzenesulfonate	HMDB0303289	337830			517327		Benzenoids	Benzene and substituted derivatives	Benzenesulfonic acids and derivatives	*	37.4	0	M-H	C6H5NaO3S	-3.91728	2.66404	0.0349887	0.126838	0.581406	1.49631	83083.9	55526	107730	98404.1	86384.3	86196.8	43759	99420.3	59692.5	34704	61459.3	68694	38200.5	91955.4	48277.8	45391
0.63_156.0769m/z	156.077	0.628083	pos	L-Histidine	HMDB0000177	21		C00135	6274	71-00-1	Organic acids and derivatives	Carboxylic acids and derivatives	Amino acids, peptides, and analogues	***	58.9	97.8	M+H	C6H9N3O2	0.965024	2.65135	0.0322749	0.122437	-0.408377	0.753471	83458.2	110765	53531.2	71375	86456.8	81000.5	73042.1	91992.5	126809	126957	108634	100826	143001	83218.6	109884	102835
12.85_577.4111n	578.418	12.8502	pos	PC(22:1(11Z)/0:0)		76576	LMGP01050134		52924057		Lipids and lipid-like molecules	Glycerophospholipids	Glycerophosphocholines	*	52.8	69.6	M+H, M+Na	C30H60NO7P	0.69522	2.62124	0.00632739	0.0661021	-1.24804	0.42102	18218.1	43271.4	16242.9	15973.5	7795.84	45032.1	16370.5	13524.6	12587.5	65875.6	40296.4	29646.3	38866.3	27560.6	35258.6	65396.1
14.70_201.9757m/z	201.976	14.7033	pos	3-Methylsulfinylpropyl isothiocyanate	HMDB0006095	58356			10455	505-44-2	Organosulfur compounds	Sulfoxides	Unclassified	*	37	0	M+K	C5H9NOS2	0.144456	2.61634	0.0192319	0.0987549	0.332159	1.2589	119698	95081.7	105342	117803	125210	125866	103079	135266	125319	87653.2	87077.6	118742	72833.5	130062	80133	89070.8
1.29_547.0903m/z	547.09	1.28923	neg	Dotmp	HMDB0247657				124761		Organic acids and derivatives	Organic phosphonic acids and derivatives	Organic phosphonic acids	*	38.8	0	M-H	C12H32N4O12P4	1.51806	2.61385	0.00053389	0.0364127	-1.35933	0.389764	12167.8	31218.3	23884.1	9598.65	12072	11450.5	3093.13	12006.6	13069.3	14550.2	29725.9	43685.6	32570.1	31618.5	36627.1	29750.7
0.58_180.9732m/z	180.973	0.57955	neg	2,3,5,6-Tetrafluorobenzenethiol	HMDB0245438				69859		Benzenoids	Thiophenols	Unclassified	*	37.4	0	M-H	C6H2F4S	-4.71391	2.59128	0.0361353	0.12885	0.531063	1.44499	87167.1	60323.5	104892	88335.4	90654.5	104951	52114.1	109452	59771.3	39614.6	70640.1	79171.2	43433.2	90394.9	51202.3	47808.5
9.51_491.2300m/z	491.23	9.50793	pos	Mozambioside	HMDB0037002	91985			73822377	70717-95-2	Organoheterocyclic compounds	Naphthofurans	Unclassified	*	38.3	5.89	M+H-H2O	C26H36O10	4.88902	2.55492	2.05217e-05	0.0150955	-32.6219	1.51301e-10	2.41397e-06	15954.8	2.41397e-06	2.41397e-06	2.41397e-06	2.41397e-06	2.41397e-06	2.41397e-06	2.41397e-06	7239.08	13695.9	21028.2	19282.3	23745.9	17964.4	8727.81
0.71_610.2192m/z	610.219	0.708033	pos	N-Acetyl-D-glucosaminyldiphosphodolichol	HMDB0001445	6251		C04500	11953837		Organic oxygen compounds	Organooxygen compounds	Carbohydrates and carbohydrate conjugates	*	36.2	0	M+Na	C23H43NO12P2	6.66085	2.55446	0.0211453	0.1019	1.23536	2.3544	42727	18147.7	83941.2	28392.1	40224.4	31893.5	32769.4	21172.1	60696.6	22803	17098.1	6758.79	31268.9	6167.62	11313.5	31624.1
10.91_235.1694m/z	235.169	10.9146	pos	Petasalbin	HMDB0035639	90907			495921	4176-11-8	Lipids and lipid-like molecules	Prenol lipids	Sesquiterpenoids	*	45.1	33.8	M+H	C15H22O2	0.435299	2.55385	0.004392	0.0603553	0.609776	1.52602	58728.8	38484.9	55091.5	56064.4	61706.5	57252.5	42704.7	71626.9	66654.8	27130.4	39695.5	45605.1	26724.4	60990.3	38689.7	30558.7
8.05_191.1311n	192.138	8.05053	pos	Diethyltoluamide	HMDB0250930	3982		C10935	4284	134-62-3	Benzenoids	Benzene and substituted derivatives	Toluenes	*	57.2	87.6	M+H, M+Na	C12H17NO	0.61251	2.55281	0.00483112	0.0616724	0.936931	1.91445	46699.9	24393.3	41135	38670.2	57628.7	56522.4	27042.1	36933.2	68967.5	14323.7	18978.3	35450.6	27029.8	35153.8	25095.9	14721.2
0.61_157.0740n	158.081	0.609217	pos	N-Acetylproline	HMDB0094701	43543			66141	68-95-1	Organic acids and derivatives	Carboxylic acids and derivatives	Amino acids, peptides, and analogues	*	45.1	30.5	M+H, M+NH4	C7H11NO3	0.698535	2.53514	0.0117346	0.0817434	-0.722564	0.606019	29425.6	48555.6	25687.9	24959.6	22850.3	36349.6	32882.6	22422.7	40826.7	56182.6	33545.6	44363.2	77508.2	53666.3	39539.4	35083.9
4.99_852.4467m/z	852.447	4.98718	neg	PA(LTE4/18:3(6Z,9Z,12Z))	HMDB0264132						Unclassified	Unclassified	Unclassified	*	37	0	M-H	C44H72NO11PS	-2.74659	2.51178	0.00166495	0.0484642	1.56363	2.95596	26668.1	9021.79	29005.8	29956.1	30530	11783.5	14600	29492.4	41308.7	2679.12	11456.3	11840.5	2226.99	17913.9	7076.33	9959.38
10.47_588.3305m/z	588.33	10.4705	neg	LysoPC(20:4(5Z,8Z,11Z,14Z)/0:0)	HMDB0010395	61705	LMGP01050048	C04230	24779476	60701-99-7	Lipids and lipid-like molecules	Glycerophospholipids	Glycerophosphocholines	***	66.6	96.5	M+FA-H	C28H50NO7P	-0.440358	2.5063	0.0198995	0.0999269	-1.30724	0.404094	15298.7	37859.4	9226.41	3762.5	7999.71	3989.56	36836.2	6009.58	39267.3	34925.7	32546.5	16546.6	55159.5	24638.4	60662.5	40536.3
0.75_215.0327m/z	215.033	0.7523	neg	2-C-methyl-D-erythritol-4-phosphate	HMDB0304061	330202		C11434	443198		Organic acids and derivatives	Organic phosphoric acids and derivatives	Phosphate esters	*	40.2	3.22	M-H	C5H13O7P	0.575851	2.49891	0.00035737	0.0339275	-0.725631	0.604732	25806.7	42674.5	18360.2	25185.3	28680.4	33301.5	36142.4	24535	14441.8	42207.3	45567.7	40931.7	43389.2	50900.8	40194.1	35530.7
0.71_166.1347m/z	166.135	0.708033	pos	Nornicotine	HMDB0001126	64431		C06524	412	494-97-3	Organoheterocyclic compounds	Pyridines and derivatives	Pyrrolidinylpyridines	**	38.1	0	M+NH4	C9H12N2	5.8399	2.4936	0.00720932	0.0688776	0.329648	1.25671	98876.4	78678.9	98043.7	90832.5	116501	100934	71158.4	107907	106758	80346.6	79169.4	83997.1	76122.7	90914.8	67404.2	72797.8
0.62_203.1270n	202.12	0.6239	neg	Glycyl-Lysine	HMDB0028846	85756			306144		Organic acids and derivatives	Carboxylic acids and derivatives	Amino acids, peptides, and analogues	*	41.1	14.3	M-H, 2M-H	C8H17N3O3	0.0160536	2.46824	0.0139438	0.0870787	-0.656262	0.63452	30541.1	48132.5	28851.3	28749.4	29625	40266.8	30731.4	24146.8	31416.8	51702	31275.3	50035.8	78017.4	49530.7	42368.9	33997.8
1.11_307.0835m/z	307.083	1.11178	pos	(+)-Lysergic acid	HMDB0242256				622688		Alkaloids and derivatives	Ergoline and derivatives	Lysergic acids and derivatives	*	39.7	12.8	M+K	C16H16N2O2	-3.12831	2.46421	0.04844	0.149805	1.23287	2.35034	40600.3	17274.3	78161	21015.4	54124.5	23694.1	28759.9	59799.3	18648.1	1292.62	45109	15904	1680.12	28222.4	8410.17	20301.7
0.65_219.0830m/z	219.083	0.648267	pos	1-(2-Thienyl)-1-heptanone	HMDB0040241	94772			141581	30711-40-1	Organic oxygen compounds	Organooxygen compounds	Carbonyl compounds	*	36.1	0	M+Na	C11H16OS	8.03414	2.46082	0.000141839	0.0273998	1.00924	2.01285	32560.8	16176.4	35675.2	28192.3	24715.5	30861.8	25563.2	45692.8	37224.7	17698.4	13255.8	14633.5	18197.2	19865.2	13211.9	16372.9
2.85_179.0349m/z	179.035	2.85367	neg	3-(3,4-Dihydroxyphenyl)lactic acid	HMDB0003503	6942		C01207	439435	23028-17-3	Phenylpropanoids and polyketides	Phenylpropanoic acids	Unclassified	**	40.7	0	M-H2O-H	C9H10O5	-0.211655	2.4581	0.00159278	0.0480362	-2.47704	0.179612	4030.55	22440.3	2675.97	2472.98	2063.38	7499.44	6017.76	2899.38	4584.94	40342.2	13818.9	17779.2	28589.7	6100.62	18061	32390.5
4.39_129.0557m/z	129.056	4.38995	neg	Ketoleucine	HMDB0000695	5663		C00233	70	816-66-0	Organic acids and derivatives	Keto acids and derivatives	Short-chain keto acids and derivatives	***	63.9	94.7	M-H	C6H10O3	-0.343794	2.45709	0.0294559	0.11759	-1.30611	0.404411	16027.9	39632.6	10031.4	14331.8	9622.11	21832.9	33307.2	10916.6	12153	90661.5	26391.6	28833.7	39250.7	21179.1	28121.5	42990
10.93_479.3016n	480.309	10.9286	pos	LysoPE(18:1(11Z)/0:0)	HMDB0011505	62291	LMGP02050064		53480949		Lipids and lipid-like molecules	Glycerophospholipids	Glycerophosphoethanolamines	***	58.7	51.7	M+H, M+Na	C23H46NO7P	0.844456	2.44161	0.0236573	0.107056	-0.738081	0.599537	30356.4	50633.1	30225.1	18589	22894.3	30277.3	57343.9	19924.7	33240.4	78317.1	33632.4	38908.4	57826.2	61592.8	45497.1	38657.5
0.73_242.0192n	260.053	0.72705	pos	(6S,7R)-2,6,7,8-Tetrahydroxy-2-oxo-1,3,2lambda5-dioxaphosphonan-5-one	HMDB0260167						Organic acids and derivatives	Organic phosphoric acids and derivatives	Unclassified	*	39.1	0	M+H-H2O, M+H, M+NH4	C6H11O8P	0.236947	2.42993	0.000461929	0.0356903	-0.887216	0.540656	19460.7	35994.7	13281.5	17940.8	14286.8	22031.9	32090	22045.1	14549	38016.7	36807.1	43144.7	28456.2	44387.7	30784.1	30365.9
1.11_289.1275n	290.135	1.11178	pos	Ophthalmic acid	HMDB0005765	58300			7018721	495-27-2	Organic acids and derivatives	Carboxylic acids and derivatives	Amino acids, peptides, and analogues	***	61.9	95.6	M+H, M+Na	C11H19N3O6	0.496587	2.42214	0.00705491	0.0684563	1.0989	2.14191	33806.7	15783.5	39011.2	32610.2	26579.7	28872	34970.4	42482.6	32120.8	13960.6	45625.2	15979.5	6043.52	6971.74	11107.8	10795.9
2.60_147.0121m/z	147.012	2.59598	neg	2-Oxo-4-methylthiobutanoic acid	HMDB0001553	6319	LMFA01060170	C01180	473	583-92-6	Lipids and lipid-like molecules	Fatty Acyls	Fatty acids and conjugates	*	40.6	14.3	M-H	C5H8O3S	-0.493557	2.40573	0.000976402	0.0429044	-2.13276	0.228021	4942.71	21676.5	4188.43	2649.54	1986.49	9438.43	4664.14	3423.13	8248.77	39133	14247.7	22318.3	25173.9	7907.1	18600	24355.5
12.08_538.4085n	556.442	12.0772	pos	Octaethyleneglycol monododecyl ether	HMDB0246126				123921		Organic oxygen compounds	Organooxygen compounds	Ethers	*	43.6	21.2	M+NH4, M+Na, M+H	C28H58O9	0.795022	2.39292	0.0344709	0.125924	0.962075	1.94811	56064.1	28778.7	74176.2	58422.1	80015.4	76669.7	23123.1	18088.8	61953.5	9900.86	20740.8	36743.5	56161.6	24248.5	39916.8	13738.9
0.75_558.0880m/z	558.088	0.745533	pos	Lipoyl-AMP	HMDB0059635	63896		C16238	23724672		Nucleosides, nucleotides, and analogues	Purine nucleotides	Purine ribonucleotides	*	36.1	0	M+Na	C18H26N5O8PS2	5.08275	2.37727	0.00768356	0.0706595	1.55734	2.94311	29096.8	9886.44	49857.2	22076.2	20512.2	20738	37207.2	12075.4	41211.7	20174	9385.04	694.399	14829	1577.13	4095.74	18449.8
0.71_408.0903m/z	408.09	0.708033	pos	(S)-2,3-Dihydro-3,5-dihydroxy-2-oxo-3-indoleacetic acid 5-glucoside	HMDB0034674	90128			131751604	218604-37-6	Lipids and lipid-like molecules	Prenol lipids	Monoterpenoids	*	38.9	5.31	M+Na	C16H19NO10	0.380804	2.36994	0.0116325	0.081423	-2.0734	0.237599	5808.36	24446	2.41397e-06	6652.67	4183.65	11110.9	8323	8399.88	1988.36	11284.2	23324	43795.2	15361.3	49220.3	21033.1	7103.97
14.73_207.0176m/z	207.018	14.7327	pos	5-Nitro-ortho-anisidine		73163		C19469	7447	99-59-2	Unclassified	Unclassified	Unclassified	*	38.1	0	M+K	C7H8N2O3	5.66671	2.36824	0.0176464	0.0958237	0.336241	1.26246	90642.8	71798.4	81945.5	87362.8	93426.8	98998.8	79079.5	95352.7	98333.7	66324.7	73841.3	86472.5	51287.6	97094.1	54934.6	72634.2
0.79_180.0633n	179.056	0.794883	neg	D-Fructose	HMDB0000660			C02336	439709	53188-23-1	Organic oxygen compounds	Organooxygen compounds	Carbohydrates and carbohydrate conjugates	***	54.3	73.3	M-H, 2M-H	C6H12O6	-0.452021	2.36735	0.0156508	0.0905369	0.567767	1.48223	61980.2	41815.6	47317.8	63258.7	59813.6	59176.3	40687.7	92341.7	71265.5	29118.7	43700.1	44580.7	45269.5	37321	56875.6	35843.3
0.59_233.1264n	251.16	0.58995	pos	4-[(2,4-Dihydroxy-3,3-dimethylbutanoyl)amino]butanoic acid	HMDB0246316				2527		Organic acids and derivatives	Carboxylic acids and derivatives	Amino acids, peptides, and analogues	*	51.8	62.6	M+NH4, M+Na	C10H19NO5	0.526933	2.36623	0.013829	0.0867347	-0.536424	0.689478	38644	56048.2	19436.1	43553	42907.3	51064.2	40819.1	30916.5	41811.6	46124	49432.1	52015.6	75727.5	65112.5	62743.4	41182
12.06_582.4347n	600.469	12.0598	pos	Polidocanol	HMDB0256665	69582		C13493	656641	3055-99-0	Organic oxygen compounds	Organooxygen compounds	Ethers	*	41.1	10.5	M+NH4, M+Na, M+H	C30H62O10	0.671982	2.34882	0.0196302	0.0997	1.17986	2.26555	41788.6	18445.2	45498.6	49990.9	62639.5	57631.1	18332.5	9793.78	48633.8	4987.18	12812.3	27994.9	30929.2	15585.9	30745.9	6061.18
4.64_277.0899n	322.088	4.63668	neg	Asparagine glutamate	HMDB0248666						Organic acids and derivatives	Carboxylic acids and derivatives	Amino acids, peptides, and analogues	*	39.1	1.1	M-H, M+FA-H	C9H15N3O7	-3.81726	2.31346	0.0259729	0.111325	0.587737	1.50289	60952.4	40556.9	59449.5	66651.1	77306.4	61471.1	42882.3	78127.6	40779.1	23187	40556.4	52844.3	29654.7	67808.8	35612.7	34234.3
6.37_199.1573n	222.147	6.3684	pos	11-nitro-1-undecene	HMDB0062669	353288			543829		Organic 1,3-dipolar compounds	Allyl-type 1,3-dipolar organic compounds	Organic nitro compounds	*	40.5	5.51	M+Na, M+K	C11H21NO2	0.441416	2.30091	0.00242009	0.0518179	0.351297	1.27571	74089.7	58077.4	65106.7	72602.7	72519.9	75889.5	68307.5	84043.1	80158.4	50341	57627	66474.1	53290.7	73566.9	49058.9	56183
12.06_378.2771n	379.284	12.0598	pos	MG(20:4(8Z,11Z,14Z,17Z)/0:0/0:0)	HMDB0011579	62361			53480987		Lipids and lipid-like molecules	Glycerolipids	Monoradylglycerols	***	73.9	92.2	M+H, M+Na, M+H-H2O	C23H38O4	0.210549	2.28957	0.00841633	0.0729087	-1.21467	0.43087	13203.5	30643.8	6399.78	4990.95	8769.66	30301.5	22137.9	5519.44	14305.3	43793.8	29731.3	14135.1	38893.5	17899.7	37105.1	32948.1
0.73_555.1191m/z	555.119	0.730267	neg	D-Erythroascorbic acid 1'-a-D-xylopyranoside	HMDB0033626	89426			131751465	174339-85-6	Organic oxygen compounds	Organooxygen compounds	Carbohydrates and carbohydrate conjugates	*	37.6	0	2M-H	C10H14O9	-2.18081	2.28926	0.000151744	0.0273998	2.27132	4.82764	18262.8	3782.97	32760.8	17312.7	17321.6	18734.9	15136.6	11494.8	15078.4	4890.18	5920.97	1971.08	4889.73	1724.6	1848.05	5236.18
0.77_256.0592m/z	256.059	0.773817	neg	Avenin	HMDB0248738	338418			95924		Organic acids and derivatives	Organic phosphoric acids and derivatives	Phosphate esters	*	39.6	0.714	M+FA-H	C6H14NO5P	0.377622	2.28764	0.0128053	0.0847088	-1.13968	0.453859	17413.2	38366.8	17131	5881.89	11197.7	15091.5	15556.1	38342.3	18691.6	35579	46681.3	20140.6	41202	14699.4	54462	55803.7
4.72_209.0455m/z	209.045	4.72107	neg	Vanilpyruvic acid	HMDB0011714	62448			14124	1081-71-6	Benzenoids	Benzene and substituted derivatives	Phenylpyruvic acid derivatives	***	66.2	69.9	M-H	C10H10O5	-0.338822	2.28366	0.0227796	0.105215	0.515204	1.4292	64689.1	45262.6	70041.2	65871.1	74377.5	67009.3	47276.7	83925.6	44322.5	31627.5	45690.2	54623.6	33371.8	70667.2	41236.1	39621.9
8.39_354.2408n	377.23	8.39485	pos	11b-PGF2a	HMDB0010199		LMFA03010036	C05959	5280886		Lipids and lipid-like molecules	Fatty Acyls	Eicosanoids	*	42.6	18.8	M+NH4, M+Na, M+H-H2O	C20H34O5	0.484197	2.26433	0.0274192	0.114046	-0.991421	0.502982	17068.4	33934.3	8310.19	20631.6	11926.9	21591.2	22379.6	11010.7	23628.2	40823.2	17653.1	34816.1	66629.6	22009.8	22663.7	32944.8
9.23_334.2354m/z	334.235	9.2321	pos	N-tetradecanoyl-homoserine lactone		64716	LMFA08030038		58122267	202284-87-5	Lipids and lipid-like molecules	Fatty Acyls	Fatty amides	*	39	0	M+Na	C18H33NO3	0.482421	2.26137	0.0123181	0.0832429	0.329908	1.25693	82684.8	65783	77181.2	79549.4	88869.1	85322.8	70006.9	93266.9	84597.7	52860.6	66673.2	73712.5	54207.5	90138.9	57656.7	65231.5
10.73_193.1589m/z	193.159	10.7316	pos	Pseudoionone	HMDB0032498	88498			1757003	3548-78-5	Lipids and lipid-like molecules	Prenol lipids	Monoterpenoids	*	52.6	66.8	M+H	C13H20O	1.03859	2.25892	0.00364112	0.0572702	0.633844	1.55169	42660.2	27492.7	40442	43029.3	46606.1	41740	26756.6	55005.1	45042.6	20708.7	29935.2	33775.2	19608.6	39299.1	23424.4	25697.7
11.43_228.2324m/z	228.232	11.4309	pos	Xestoaminol A			LMSP01080078		14756402		Lipids and lipid-like molecules	Sphingolipids	Sphingoid bases	*	42.7	17.9	M+H	C14H29NO	0.700109	2.2463	0.00571424	0.0637471	0.344166	1.26942	73472.6	57879	65617.6	71446.9	78772.3	77251.6	64715.3	79946.3	76558.2	45425	58632.1	65864.4	50176.1	75160	48792.1	61103.3
12.50_447.2986n	470.288	12.5008	pos	N-(3beta,7beta,dihydroxycholest-5-en-24-oyl) glycine			LMST05030017				Lipids and lipid-like molecules	Steroids and steroid derivatives	Steroid conjugates	*	54.1	75.3	M+H, M+Na	C26H41NO5	0.257373	2.24469	0.00247556	0.0520461	-5.45256	0.0228358	411.118	18003.3	2.41397e-06	328.226	174.05	950.363	716.779	215.422	492.987	35281	33907.9	8160.3	11915.2	4610.84	12784	19363.5
0.59_413.2132m/z	413.213	0.58995	pos	AFP 07 (free acid)		96511			95549476	788799-13-3	Unclassified	Unclassified	Unclassified	*	49.8	62.9	M+H	C22H30F2O5	-0.478268	2.22833	0.00363452	0.0572702	0.937603	1.91534	34082.1	17794.2	36370.1	33744.3	31061.4	42128.5	32746.5	16229.2	46294.4	25208.9	12602.9	9164.94	26991.2	13539.5	13530.3	23521.8
12.09_299.2826n	300.29	12.094	pos	Palmitoylethanolamide	HMDB0002100	75537	LMFA08040013	C16512	4671	544-31-0	Organic acids and derivatives	Carboximidic acids and derivatives	Carboximidic acids	***	56.5	86.5	M+H, M+Na	C18H37NO2	0.553229	2.21061	0.022582	0.104718	-1.6526	0.318067	7718.65	24267.3	4644.85	6830.29	7504.87	9948.12	10908.1	8828.96	5365.36	34040.5	19479.1	12186.9	56837.4	9298.82	14266.6	23762.1
10.82_634.3336m/z	634.334	10.8233	neg	PC(2:0/PGE1)	HMDB0288894						Unclassified	Unclassified	Unclassified	*	41.6	17.8	M-H	C30H54NO11P	-4.11666	2.20641	0.0107721	0.0797154	-1.63565	0.321826	7092.96	22039.7	4484.26	1365.42	2298.19	7700.54	18022.2	3038.24	12741.9	34214.7	17131.9	12747.6	32782.9	11532.6	35498.2	10370.5
7.68_316.2040n	317.211	7.68147	pos	Cyrneine A		53673	LMPR0104260001		12000424		Lipids and lipid-like molecules	Prenol lipids	Isoprenoids	*	52.4	65.3	M+H-H2O, M+H	C20H28O3	0.523253	2.20125	0.0219148	0.103244	-1.04176	0.485734	15282.2	31462.1	10014.9	13452.1	9645.49	19658.4	23558.3	7750.18	22896	52722	17529	29864.6	51098.2	18244.6	20924.8	29851.3
0.83_162.0762m/z	162.076	0.82825	pos	Glucosamine	HMDB0001514	63216		C00329	439213	3416-24-8	Organic oxygen compounds	Organooxygen compounds	Carbohydrates and carbohydrate conjugates	***	55.5	80.9	M+H-H2O	C6H13NO5	0.772684	2.19142	0.00389399	0.0579858	0.682509	1.60493	40479.1	25221.7	46293.6	40781	47056.5	37647.1	20717.9	40143.6	50713.9	16758.1	23548.3	32142.8	26534.7	32367.3	22251.2	22949.7
10.66_336.2511m/z	336.251	10.6604	pos	N-Lauroyl Leucine	HMDB0242035						Unclassified	Unclassified	Unclassified	*	45	32.2	M+Na	C18H35NO3	0.704714	2.18986	0.00408261	0.0588788	0.480423	1.39515	52055.7	37311.8	50744	54007.1	54646.7	50693.3	37559.1	62219.5	54520.2	27491.5	37347.9	44915.9	32126.3	51087.1	32670.1	35543.9
4.70_299.0148m/z	299.015	4.70173	neg	2,2,3,3,3-Pentafluoro-1-propanol	HMDB0245341	337146			9872		Organohalogen compounds	Halohydrins	Fluorohydrins	*	42	21.4	2M-H	C3H3F5O	4.08239	2.1857	0.00242899	0.0518811	-1.98262	0.253031	5034.14	19895.4	3068.62	1732.4	1679.27	8415.62	5503.64	2498.01	12341.4	35049.2	13456.2	17064.4	24803.3	5981.26	17231.8	25681.5
8.54_377.2331m/z	377.233	8.54015	neg	21-Hydroxypregnenolone	HMDB0004026	7002	LMST02030167	C05485	247020	1164-98-3	Lipids and lipid-like molecules	Steroids and steroid derivatives	Hydroxysteroids	***	45.5	33.3	M+FA-H	C21H32O3	-0.665661	2.18448	0.0392641	0.13468	-1.13658	0.454836	13367.6	29390	7331.14	13525.1	8671.16	20879.8	16347.2	8075.69	18743.3	47243.7	10637.3	26384.5	59739	19780.4	21195.3	20749.8
8.05_299.1831m/z	299.183	8.05053	pos	Caffeine, 8-((3-methoxypropyl)amino)-	HMDB0247409				56998		Organoheterocyclic compounds	Imidazopyrimidines	Purines and purine derivatives	*	39	0	M+NH4	C12H19N5O3	1.85822	2.18327	0.00495919	0.0617697	-5.00458	0.031151	443.463	14235.9	262.178	445.178	522.06	438.598	479.295	501.551	455.38	2242.66	6149.79	28503.8	15606.3	25886.7	17755.9	3506.22
4.20_763.4058m/z	763.406	4.2031	pos	Torvonin A	HMDB0030732	87158			131751074	99956-65-7	Lipids and lipid-like molecules	Steroids and steroid derivatives	Steroidal glycosides	*	37.1	0	M+K	C39H64O12	3.97698	2.18115	0.00319252	0.0568009	1.60157	3.03474	21650	7134.07	19319.4	22973.1	20249.3	28670.6	10052.8	33747.8	16537.1	857.643	8291.54	10765.7	1559.77	20668.7	2996.38	4798.69
1.15_383.1222m/z	383.122	1.15257	neg	6,8-Bis(sulfanyl)octanal	HMDB0258126				53825251		Organic oxygen compounds	Organooxygen compounds	Carbonyl compounds	*	37.5	5.32	2M-H	C8H16OS2	2.43957	2.1724	0.00311032	0.056412	-1.7136	0.304899	5868.6	19247.7	5045.89	5746.85	5631.04	3522.32	11731.8	5440.61	3961.7	22473.8	14823.6	9711.54	33385.9	10603.5	28918	14817.5
12.01_670.4885n	688.522	12.0122	pos	PA(P-18:0/17:2(9Z,12Z))		82278	LMGP10030038		52929693		Lipids and lipid-like molecules	Glycerophospholipids	Glycerophosphates	*	36.1	0	M+NH4, M+Na	C38H71O7P	-7.87755	2.16939	0.00331074	0.0569514	0.950002	1.93188	32566.6	16857.5	41172.5	42936.7	36496.2	37877	21329.7	17266.2	30888.2	7186.92	12382.9	18998.1	19204.2	20889	23715.8	15625.7
0.65_212.0676n	235.057	0.648267	pos	Propyl gallate	HMDB0033835	68880		C11155	4947	121-79-9	Benzenoids	Benzene and substituted derivatives	Benzoic acids and derivatives	*	37.7	1.15	M+Na, M+K	C10H12O5	-4.08346	2.15974	0.0125289	0.0838779	0.475357	1.39026	60260.2	43344.5	66244.1	51187.8	43992.5	47482.2	59789.7	80535.4	72589.9	53840.1	35691.6	44229.6	48514.5	44318.7	33850.3	42966.8
10.34_526.3145m/z	526.315	10.3379	neg	LysoPC(15:0/0:0)	HMDB0010381	61691	LMGP01050016	C04230	24779458		Lipids and lipid-like molecules	Glycerophospholipids	Glycerophosphocholines	***	68.4	94.9	M+FA-H	C23H48NO7P	-1.10985	2.14023	0.00345702	0.0569514	-1.24216	0.422741	9427.32	22300.5	3890.2	4297.99	9624.24	8042.22	22067.8	5208.88	12859.9	23072.3	17730.2	16964.8	36811.1	20037.1	22950.2	18537.8
0.81_160.1333m/z	160.133	0.8082	pos	Methacholine	HMDB0015654	316603		C07471	1993	55-92-5	Organic nitrogen compounds	Organonitrogen compounds	Quaternary ammonium salts	*	49.5	50.3	M+H	C8H17NO2	0.818317	2.13901	0.0418387	0.139248	-0.905142	0.53398	22625.5	42371.4	21543.8	28278.6	9199.22	34242.8	16668.8	19869.9	28575.2	78267.2	23333.4	19489.3	53971.2	28359.3	36889.2	56290.1
0.69_204.1538m/z	204.154	0.69025	pos	S-(2-(N,N-Diisopropylamino)ethyl)isothiourea	HMDB0244614	427264			132460		Organosulfur compounds	Isothioureas	Unclassified	*	36	0	M+H	C9H21N3S	4.35424	2.1385	0.0110436	0.079932	-1.86151	0.275189	5479.11	19910.4	2652.6	6195.67	4320.42	5107.94	10751.8	3188.39	6137	33820.7	9807.12	12194	40313.9	8980.45	13862.6	20393.9
11.19_592.3618m/z	592.362	11.1883	neg	LysoPC(20:2(11Z,14Z)/0:0)	HMDB0010392	61702	LMGP01050132	C04230	52924053		Lipids and lipid-like molecules	Glycerophospholipids	Glycerophosphocholines	***	71.6	99.2	M+FA-H	C28H54NO7P	-0.374123	2.13228	0.0118007	0.0819055	-1.06108	0.479272	15531.3	32406	11556.5	8588.07	8163.38	19998.8	28277.2	13649.5	18485.5	56306.8	39413.3	15841.9	32825.7	21053.9	27746.1	33654.2
13.63_282.2556n	281.248	13.6262	neg	Elaidic acid	HMDB0000573	3406	LMFA01030073	C01712	637517	112-79-8	Lipids and lipid-like molecules	Fatty Acyls	Fatty acids and conjugates	**	57.8	0	M-H, M+FA-H	C18H34O2	-0.991702	2.11732	0.021299	0.102165	-0.71669	0.608492	30040.2	49368.2	23764.2	23185.4	34555.6	31227.7	38578.1	20706.3	38264	77980.2	57624.9	29205.7	48757.7	33621.9	35742.2	62645.1
4.16_275.1468m/z	275.147	4.15805	pos	4alpha-hydroxy-tetrahydrobiopterin	HMDB0304198	64413		C15522	129803		Organoheterocyclic compounds	Pteridines and derivatives	Pterins and derivatives	*	39.9	2.6	M+NH4	C9H15N5O4	2.07847	2.10412	0.0435514	0.141729	0.631322	1.54898	55828.8	36042.2	35485.6	75085.5	81624.9	55251.4	61935.6	41550.4	39867.9	16458.5	26818.1	50627.9	40234.1	55625.2	22393.6	40138
4.92_173.1174m/z	173.117	4.91752	pos	9-hydroxy-5Z-nonenoic acid		74606	LMFA01050232		5312793		Lipids and lipid-like molecules	Fatty Acyls	Fatty Acids and Conjugates	*	50.6	55.6	M+H	C9H16O3	0.837494	2.10089	0.00407871	0.0588711	0.371956	1.29411	60992	47130.6	53362	57770	59867.7	65548.3	55959.6	70864	63572	44267.4	44902.6	52668.1	42074.4	63203.4	37471.6	45326.5
9.65_563.3228n	546.319	9.64948	pos	OOB-PE			LMGP20020034		134812364		Lipids and lipid-like molecules	Glycerophospholipids	Oxidized glycerophospholipids	*	54.5	77.4	M+H-H2O, M+Na	C27H50NO9P	0.789884	2.09472	0.00646407	0.0666587	1.07972	2.11362	27483.8	13003.2	44058.6	32825.7	23781	15380.9	30724.7	32291.3	13324.2	14292	7833.81	9466.3	11280.5	12351.2	14431.7	21366.7
5.25_239.0890m/z	239.089	5.25218	pos	Isoketocamphoric acid	HMDB0301824						Lipids and lipid-like molecules	Fatty Acyls	Fatty acids and conjugates	*	39.2	0.49	M+Na	C10H16O5	0.158339	2.08403	0.00245838	0.0520461	0.37741	1.29901	55425.8	42667.8	50598.5	50464.7	53666.8	57324.4	48084.3	64078.8	63763.3	38966.5	42892.7	43156.6	37583.6	55488.2	39537.6	41049.4
4.47_183.0662m/z	183.066	4.46543	neg	1-(2-Furanyl)-1-butanone	HMDB0039802	94351			228588	4208-57-5	Organic oxygen compounds	Organooxygen compounds	Carbonyl compounds	*	49	47.3	M+FA-H	C8H10O2	-0.799242	2.07965	0.0305451	0.119125	0.460605	1.37612	62360.9	45316.5	64918.2	67812.5	74958.4	62027.3	50297.7	74872.2	41639.8	29345.7	44990.1	56951.8	34947.4	69142.5	41357.2	40480.8
6.91_144.1384m/z	144.138	6.90787	pos	Octanamide	HMDB0255903	340340			69414		Lipids and lipid-like molecules	Fatty Acyls	Fatty amides	*	45.4	30.6	M+H	C8H17NO	1.01035	2.07903	0.0139995	0.0871284	0.333398	1.25998	69781	55382.7	61020.3	61797.3	73124	72283.3	62703.1	83204.1	74334.6	44603.5	57409.3	61899.6	45420.7	73809.4	48758.6	55777.8
1.11_312.0569n	357.055	1.1114	neg	3,5,7,8-Tetrahydro-2-[4-(trifluoromethyl)phenyl]-4H-thiopyrano[4,3-d]pyrimidin-4-one	HMDB0259924	45564			135418940	284028-89-3	Organoheterocyclic compounds	Pyranopyridines	Unclassified	*	39.2	14.4	M-H, M+FA-H	C14H11F3N2OS	8.03119	2.07738	0.00296061	0.0557239	1.01581	2.02204	25394	12558.6	26181.2	25349.4	32887.4	18736.3	16031	25234.5	33338.6	5820.18	17617.4	20719.2	5390.19	19138.2	9908.12	9317.07
4.70_248.0175m/z	248.018	4.70173	neg	(2R,3S)-2-methylisocitrate	HMDB0303970				23615311		Organic acids and derivatives	Carboxylic acids and derivatives	Tricarboxylic acids and derivatives	*	39.5	0.0905	M+FA-H	C7H7O7-3	0.595565	2.07618	0.0064628	0.0666587	-2.3804	0.192056	3384.38	17621.9	2081.5	1287.73	1050.16	5193.35	4034.41	1610.51	8433.02	37624.9	10035.1	11921.9	23724.8	3657.18	15053.8	21335.4
0.77_182.9967m/z	182.997	0.773817	neg	6-Thiourate	HMDB0060417	449238		C16613	3032417	2002-60-0	Organoheterocyclic compounds	Imidazopyrimidines	Purines and purine derivatives	*	36.8	0	M-H	C5H4N4O2S	-8.08078	2.05838	0.0126993	0.0843781	1.57291	2.97504	23374.9	7857.01	8520.46	25664.1	18752.2	51311.1	23108.5	23236.1	13031.9	8918.3	13302.3	7232.06	6559.77	8443.16	5403.67	5139.79
7.68_419.2050m/z	419.205	7.67528	neg	Trospectomycin	HMDB0259301				13580504		Organoheterocyclic compounds	Dioxanes	1,4-dioxanes	*	46.6	40.9	M+FA-H	C17H30N2O7	4.04737	2.05364	0.0163744	0.0923897	-1.05506	0.481279	12376.4	25715.6	9819.61	12121.2	8904.2	15394.2	16935.3	7708.29	15751.6	39109	14479.6	25833.4	45089.8	15613.7	16115	23768.6
4.69_367.0021m/z	367.002	4.69347	neg	2-Thiouric acid	HMDB0245324	435839			3034255		Organoheterocyclic compounds	Imidazopyrimidines	Purines and purine derivatives	*	37.5	0	2M-H	C5H4N4O2S	-4.29507	2.04849	0.00118001	0.0440734	-1.99894	0.250184	4172.56	16678	2614.11	1535.86	1420.27	8391.26	4634.75	2470.34	8141.31	27991.8	12044.7	15018.6	20251.3	5727.49	14196	21516
0.83_411.1476m/z	411.148	0.82825	pos	b-D-Xylopyranosyl-(1->4)-a-L-rhamnopyranosyl-(1->2)-L-arabinose	HMDB0041221	95640			131753072		Organic oxygen compounds	Organooxygen compounds	Carbohydrates and carbohydrate conjugates	*	40.5	17.3	M+H-H2O	C16H28O13	-4.8394	2.04602	0.00133032	0.0458595	1.28925	2.444	20265	8291.75	7883.19	19180	23836.2	17827.2	30019.9	22293.4	20815.6	6711.59	14552.4	6397.06	5730.06	10053.1	4234.2	10363.8
0.69_107.9980n	126.032	0.69025	pos	Vinylphosphonic acid	HMDB0259829						Organic acids and derivatives	Organic phosphonic acids and derivatives	Organic phosphonic acids	*	39.9	10.9	M+H, M+NH4	C2H5O3P	3.71313	2.03589	0.0018236	0.0496567	1.12886	2.18686	23126.4	10575.2	18118.8	19459.7	19469.5	26826.3	15919.4	36558.8	25532.5	5679.21	8077.8	12577.2	9326.07	19231.9	10284.2	8849.73
10.21_205.1589m/z	205.159	10.2089	pos	Isokobusone	HMDB0036791	44491		C16977	3860435	24173-72-6	Organic oxygen compounds	Organooxygen compounds	Alcohols and polyols	*	39	0	M+H-H2O	C14H22O2	0.878192	2.03063	0.00475737	0.061561	0.521858	1.4358	41414.3	28844	39556.4	41754.6	44097.3	41601.2	29702	50118.1	43070.4	21306.8	30139.5	35319.5	21482.1	41320.7	24625.5	27713.8
13.36_156.1384m/z	156.138	13.3614	pos	4E,8-Nonadienal		46426	LMFA06000135		44256564		Lipids and lipid-like molecules	Fatty Acyls	Fatty aldehydes	*	43.3	19	M+NH4	C9H14O	0.779997	2.01872	0.0344703	0.125924	0.317568	1.24623	78533.5	63017	70968.3	73421.1	83900.4	80606.6	63795.9	91869.2	85172.8	55911.1	63456.9	76079.9	49534.9	88337.8	51434.1	56364.1
1.11_366.0940m/z	366.094	1.1114	neg	PS(18:0/22:6(4Z,7Z,10Z,13Z,16Z,19Z))	HMDB0010167	40825	LMGP03010040	C02737	24779546		Lipids and lipid-like molecules	Glycerophospholipids	Glycerophosphoserines	*	38.2	0	M-H2O-H	C13H24NO10P	-4.93577	2.00806	0.00279335	0.0550046	1.01208	2.01682	23791.8	11796.7	14171.5	20345.4	25447.8	33610	24855	18768.6	29344.5	7051.08	20811.8	14011.6	5693.6	15250.5	8337.79	11420.5
10.13_460.2695m/z	460.27	10.1273	pos	[(2S,4R,5R,6R,14S,16R)-14-Hydroxy-7,11-dimethyl-6-(2-oxopyran-4-yl)-3-oxapentacyclo[8.8.0.02,4.02,7.011,16]octadecan-5-yl] acetate	HMDB0247800				78168774		Lipids and lipid-like molecules	Steroids and steroid derivatives	Steroid esters	*	53.9	71.6	M+NH4	C26H34O6	0.366168	2.00776	0.00412696	0.0591228	0.545253	1.45928	37576	25749.7	27968.9	34427.2	37301.4	45520.8	28343.6	48142.7	41327.4	21754.6	25963.4	24283	22603.1	31178	23206.6	31259.5
0.71_289.0328m/z	289.033	0.71145	neg	D-Sedoheptulose 7-phosphate	HMDB0001068	3418		C05382	92042786	89927-08-2	Organic oxygen compounds	Organooxygen compounds	Carbohydrates and carbohydrate conjugates	***	50.9	57.4	M-H	C7H15O10P	-0.662562	2.00167	0.00158038	0.0479415	-1.12408	0.458795	9830.98	21427.8	3859.71	11828.8	5095.49	13581.9	22881.6	5184.93	6384.44	24981.1	20249.7	26474	18128.1	22021	18424	19716.9
10.33_284.3313m/z	284.331	10.3283	pos	14S-Methyl-1-octadecene		97436	LMFA11000019		11021850		Lipids and lipid-like molecules	Fatty Acyls	Hydrocarbons	*	39.4	1.32	M+NH4	C19H38	0.345113	1.99433	0.000139985	0.0273998	-2.89285	0.134637	1554.98	11549.4	1465.84	1796.83	2041.71	1172.65	1271.47	2124.98	1011.41	13507.6	9400.58	9355.34	21627.4	7571.67	10337.3	9046.03
2.99_194.1158n	217.105	2.98722	pos	Tetraethylene glycol	HMDB0094708				8200		Organic oxygen compounds	Organooxygen compounds	Ethers	*	45.5	32.8	M+Na, M+K, M+H	C8H18O5	2.15734	1.99154	0.0302635	0.118712	0.336824	1.26297	72905.2	57725	52459.7	78555.8	85627.7	65227.9	71470.6	75687.7	81306.7	66475.4	46884.2	76818.3	44014.8	61534.5	48380.4	59967.7
0.75_138.0551m/z	138.055	0.745533	pos	Trigonelline	HMDB0000875	273		C01004	5570	535-83-1	Alkaloids and derivatives	Unclassified	Unclassified	**	52.6	25.4	M+H	C7H7NO2	0.78336	1.9892	0.00313613	0.056412	0.553042	1.46718	39144.3	26680	41684.1	36544	34476.7	35368.4	29569.1	49352.2	47015.4	27075.5	27896.8	24888	35415.6	17212.2	25925.4	28346.6
4.71_209.0187m/z	209.019	4.70845	pos	1-Iodoheptane	HMDB0243907	349466			20274		Organohalogen compounds	Organoiodides	Unclassified	*	39.4	0	M+H-H2O	C7H15I	0.630944	1.96557	0.00769041	0.07068	-2.13657	0.22742	3837.08	16872.3	2244.73	1544.26	1282.82	7382.06	4778.32	1990.19	7637.2	35325.2	9297.35	11644.6	22542.2	4636.46	12556.4	22103.5
0.73_275.0527m/z	275.053	0.72705	pos	1-Deoxy-D-altro-heptulose 7-phosphate		66168		C04359	15942876		Unclassified	Unclassified	Unclassified	*	38.6	0	M+H	C7H15O9P	0.0853623	1.96047	0.000734633	0.0402098	-1.65945	0.316561	5340.37	16870	5512.62	2525.71	1236.83	13777.2	5318.81	3212.98	5798.42	17119.3	16224	11456.2	20340.5	8826.8	19291.5	24831.3
2.02_217.0474m/z	217.047	2.01912	pos	(2S,3R,4S,5R,6R)-6-Ethyloxane-2,3,4,5-tetrol	HMDB0242656				20707644		Organic oxygen compounds	Organooxygen compounds	Carbohydrates and carbohydrate conjugates	*	39.5	0	M+K	C7H14O5	0.798427	1.96018	0.0136727	0.0865952	0.367732	1.29032	57348.6	44445.2	53552.6	54271.8	60526.4	60436.8	45811.7	66787	60054	37966.3	42573.3	52238.5	35240.3	62214.9	36720	44162.8
9.61_242.1540m/z	242.154	9.61065	pos	Norbutorphanol	HMDB0041954	96191			5490068	3792-68-5	Benzenoids	Phenol esters	Unclassified	*	46.8	37.1	M+H-H2O	C16H21NO2	0.26311	1.95749	0.000374009	0.0339275	-9.98952	0.000983682	9.78267	9944.95	21.4775	2.41397e-06	2.41397e-06	23.0923	2.41397e-06	23.9089	2.41397e-06	3122.78	8970.02	18855.5	11043.4	12410.7	11378.5	3833.72
0.58_152.9785m/z	152.978	0.57955	neg	Dihydroxy-(2-methoxyethoxy)-sulfanylidene-$l^{5}-phosphane	HMDB0258062				87131396		Organic acids and derivatives	Organic thiophosphoric acids and derivatives	Thiophosphoric acid esters	*	39	0	M-H2O-H	C3H9O4PS	2.23091	1.95635	0.040478	0.136911	0.535631	1.44958	49968.8	34471.4	64087.6	47281.7	46820.7	60930.3	28325.1	64162.7	38173.6	22202.7	43603.1	47939	24484.2	47309.8	28520.5	27240.1
1.16_200.9725m/z	200.973	1.15645	pos	N-Nitrosothiazolidine-4-carboxylic acid	HMDB0040192	94727			104890	86594-16-3	Organic acids and derivatives	Carboxylic acids and derivatives	Amino acids, peptides, and analogues	*	40.6	13.6	M+K	C4H6N2O3S	-3.39916	1.94788	0.0489283	0.150423	0.264342	1.20109	93152.7	77556.9	83073.7	89744.2	100456	100134	77138.8	103447	98074.7	68966.7	76438	92993.3	64542.2	105896	63958	70103.8
0.82_232.0526n	277.054	0.816917	neg	1,8-Pyrenedione		345564		C18251	16820	6217-22-7	Unclassified	Unclassified	Unclassified	*	37.9	0	M-H, M+FA-H	C16H8O2	0.594066	1.93468	5.06251e-06	0.00882698	3.07161	8.4071	10821.9	1287.23	6520.93	16227.9	11969.1	10807.1	8574.55	10325.2	11328.5	17.8548	631.423	899.692	3300.41	2645.86	744.55	770.85
0.94_464.2461m/z	464.246	0.935783	pos	Leukotriene E3	HMDB0002355	58122	LMFA03020074		6440643	79494-05-6	Lipids and lipid-like molecules	Fatty Acyls	Eicosanoids	*	52.3	80.8	M+Na	C23H39NO5S	4.46763	1.92358	0.00160492	0.0480815	0.96875	1.95714	20943	10700.8	21098.7	18247.4	23952	18596.9	14479.3	21379.4	28847.1	4658.4	13915.4	12761.2	5833.67	18005.9	7362.44	12368.5
2.60_192.9908m/z	192.991	2.6045	pos	N-methylethanolamine phosphate	HMDB0304429						Organic acids and derivatives	Organic phosphoric acids and derivatives	Phosphate esters	*	38.4	0	M+K	C3H9NO4P-	4.96835	1.91454	0.00739053	0.0696547	-1.82418	0.282402	4837.29	17129.1	3217.21	2358.07	2124.64	7843.56	3899.81	3059.07	11358.7	34543.7	9564.04	15067.2	21391.9	5885.31	12749.6	20701.9
8.75_380.2566n	403.245	8.7503	pos	1a,1b-dihomo-PGE2		36204	LMFA03010155		16061091		Lipids and lipid-like molecules	Fatty Acyls	Eicosanoids	*	43.1	22.5	M+NH4, M+Na, M+H-H2O	C22H36O5	0.907315	1.91431	0.0279996	0.11517	-1.17271	0.443588	9787.57	22064.6	4592.12	8588.55	6588.18	15642.5	10923	6672.89	15505.8	39134.4	6645.29	22092.8	37649.2	12134.6	18226.4	18569.3
5.48_162.1257n	163.133	5.47727	pos	1-O-Pentylglycerol	HMDB0243976				90819		Lipids and lipid-like molecules	Glycerolipids	Monoradylglycerols	*	41.1	6.68	M+H, M+K, M+NH4	C8H18O3	0.351987	1.91425	0.0115873	0.0813349	0.331049	1.25793	60224	47875.6	61445.6	50970.8	62134.7	60135.1	48823.2	69224	68834.6	41976.2	45992.3	55784.7	39753.5	60836.5	44949	45836.8
0.73_198.0891m/z	198.089	0.72705	pos	Aminovaleric acid betaine	HMDB0240732				14274897		Lipids and lipid-like molecules	Fatty Acyls	Fatty acids and conjugates	*	46.9	57.8	M+K	C8H17NO2	0.0512987	1.90893	0.00104682	0.0434424	0.810135	1.75338	26223.5	14956	39037	26725	24246.7	25363.6	18202	23904.9	26085.2	11229.5	11240.5	17124.9	16345.9	18559.7	16380	13811.4
10.09_270.2196n	293.209	10.0859	pos	16-hydroxy-6-hexadecenoic acid		35627	LMFA01050272		5312825		Lipids and lipid-like molecules	Fatty Acyls	Fatty Acids and Conjugates	*	44.5	27.1	M+H-H2O, M+H, M+Na	C16H30O3	0.426385	1.90688	0.0102765	0.0781426	0.75578	1.68854	27500.4	16286.5	24438.5	32450.1	24599.9	20267.5	22791.7	27783	40172.2	29899.4	18366.9	15152.4	8720.33	13813.6	10177.7	17875.1
9.68_472.1373n	495.126	9.68095	pos	Formononetin 7-O-(6''-acetylglucoside)			LMPK12050023		102463148		Lipids and lipid-like molecules	Polyketides	Flavonoids	*	40.2	5.97	M+H, M+NH4, M+Na	C24H24O10	0.845666	1.88594	0.0196941	0.0997768	0.386228	1.30697	52623.7	40263.9	57900	51819.2	59968.9	47809.6	38466	60073.3	52329.3	34024	40110.1	44204.1	30848.6	59160.2	36203.8	37296.5
11.48_265.2527m/z	265.253	11.4778	pos	6E,11Z-octadecadienal			LMFA06000282		129866842		Lipids and lipid-like molecules	Fatty Acyls	Fatty aldehydes	*	38.4	0	M+H	C18H32O	0.434916	1.87851	0.00214609	0.0503949	0.46284	1.37825	37449.7	27171.9	34926.5	35780.9	38305.2	38897.4	31516.1	41842.4	40879.3	20612.7	27991.8	31558.9	20489.6	37398.4	25708.6	26443
8.75_379.2488m/z	379.249	8.74858	neg	1a,1b-dihomo-PGD2		36205	LMFA03010156		16061092		Lipids and lipid-like molecules	Fatty Acyls	Eicosanoids	*	45.3	32.4	M-H	C22H36O5	-0.485025	1.87575	0.0423308	0.139894	-1.237	0.424255	8652.51	20394.6	3920.54	8865.61	5520.7	15355	8298.16	5673.8	12933.8	25499.3	6111.34	19479.1	46686.9	12795	16802.4	15388.1
13.44_841.5631n	859.601	13.4412	pos	PE-NMe2(22:5(7Z,10Z,13Z,16Z,19Z)/20:4(5Z,8Z,11Z,14Z))	HMDB0114565				131821672		Lipids and lipid-like molecules	Glycerophospholipids	Glycerophosphoethanolamines	*	36.2	0	M+H, M+NH4	C49H80NO8P	1.07828	1.8754	0.0298365	0.11811	0.367953	1.29052	63038.2	48847.1	46824.4	54054.8	70219.6	81092.6	58305.3	64313.6	66457.1	57730.2	42448	56140.6	40365.2	64270.9	37840.5	43134.4
12.48_449.2906m/z	449.291	12.481	neg	1alpha,25-dihydroxy-21-nor-20-oxavitamin D3 / 1alpha,25-dihydroxy-21-nor-20-oxacholecalciferol			LMST03020029		9547289		Lipids and lipid-like molecules	Steroids and steroid derivatives	Secosteroids	*	39.7	0	M+FA-H	C25H40O4	-0.607204	1.86043	0.041303	0.138392	-0.876048	0.544858	14617.6	26828.2	11605	10019.7	14879.3	22200.3	22102	12212.4	9304.49	47892	21711	15696.4	41038.5	16934.7	28830.3	15694.8
0.65_241.0918m/z	241.092	0.646067	neg	D-erythro-D-galacto-octitol	HMDB0029953	86611			219890	27655-86-3	Organic oxygen compounds	Organooxygen compounds	Carbohydrates and carbohydrate conjugates	*	37.1	0	M-H	C8H18O8	-4.49198	1.85853	0.00810488	0.0724604	0.685379	1.60812	31668.8	19693	43514.2	29018.8	34289.4	24604.3	24858.1	45488.9	19908	19303.6	19294.9	19452.8	21395	22843	17706.1	17855.8
14.30_102.0918m/z	102.092	14.2962	pos	N-butylformamide	HMDB0062600				13376	871-71-6	Organic acids and derivatives	Carboxylic acids and derivatives	Carboxylic acid derivatives	*	47.6	43.9	M+H	C5H11NO	4.36557	1.85347	0.0350773	0.127127	0.275985	1.21082	77696.1	64168.1	74534.3	76295.8	80580.7	77411.8	63363	87995.8	83690.9	51947	56841.3	76010.7	56036.1	87643.3	58751	61947.2
12.22_278.2243n	277.217	12.2189	neg	alpha-Linolenic acid	HMDB0001388	6208	LMFA01030152	C06427	5280934	463-40-1	Lipids and lipid-like molecules	Fatty Acyls	Lineolic acids and derivatives	***	57.9	30.4	M-H, M+FA-H	C18H30O2	-0.843417	1.85236	0.0316796	0.121559	-1.08422	0.471648	12972.1	27503.7	12141.8	8924.14	10212.3	10298.3	22196.5	9364.91	17666.6	55452.2	29741	12125.4	31369.3	12877.8	18801.5	32158.7
11.63_376.2615n	377.269	11.6283	pos	[12]-Gingerdione	HMDB0039278	93866			86251913	91815-31-5	Benzenoids	Phenols	Methoxyphenols	*	39.2	1.19	M+H, M+Na, M+H-H2O	C23H36O4	0.325025	1.84766	0.0244801	0.108478	-1.13786	0.454435	10633.6	23399.5	7549.84	6694.14	6987.56	17924.1	17616.1	4756.14	12907	43751.3	22390.6	10265	29802.4	8591.77	26046	22949.8
5.19_398.1947m/z	398.195	5.18785	neg	Spiredine		67145		C08711	11953914	60062-45-5	Unclassified	Unclassified	Unclassified	*	36.7	0	M+FA-H	C22H27NO3	-7.4756	1.84742	0.0130233	0.0852703	1.63955	3.11568	17913.7	5749.51	37550.3	25668.6	12751.9	5670.41	15073	17490.3	11191	4290.68	2535.04	2140.71	7598.7	5257.76	7826.32	10597.3
8.57_225.1057m/z	225.106	8.57337	pos	Thiopental	HMDB0014737	2833		C07521	3000715	76-75-5	Organoheterocyclic compounds	Diazines	Pyrimidines and pyrimidine derivatives	*	39	0.42	M+H-H2O	C11H18N2O2S	0.369816	1.8352	0.00676515	0.0673402	-3.65673	0.0792892	872.712	11006.7	691.204	800.678	871.081	1024.79	718.604	1143.66	858.971	2600.67	5453.4	23420.9	10454	20584.7	11062.3	3470.84
12.65_786.5653m/z	786.565	12.653	neg	PC(O-16:1(9Z)/18:2(9Z,12Z))	HMDB0013413	102742	LMGP01020257		53481709		Lipids and lipid-like molecules	Glycerophospholipids	Glycerophosphocholines	*	37.8	0	M+FA-H	C42H80NO7P	-0.221666	1.82841	0.0388046	0.133934	0.918613	1.8903	28692.7	15178.9	24346.4	25696.5	30056.6	22627.9	14181.8	52171.4	31768.3	3604.19	3640.07	20034.7	12224	31494.7	19894.2	15360.6
1.00_136.0619m/z	136.062	1.0017	pos	Adenine	HMDB0000034	85		C00147	190	73-24-5	Organoheterocyclic compounds	Imidazopyrimidines	Purines and purine derivatives	**	42.2	15.8	M+H	C5H5N5	0.613158	1.82797	0.0102308	0.0779785	0.954063	1.93732	23970.3	12372.9	9195.45	24713.7	27205.5	27464.2	20927	31597.1	26689.3	4162.26	14679.8	18407.4	7379.74	23181.7	12964.2	5835.31
0.81_152.0568m/z	152.057	0.8082	pos	Guanine	HMDB0000132	315		C00242	764	73-40-5	Organoheterocyclic compounds	Imidazopyrimidines	Purines and purine derivatives	***	52.7	57.4	M+H	C5H5N5O	0.699496	1.82337	0.0300149	0.118376	-0.497411	0.708377	28306.6	39959.8	25481	20563.9	21659.7	41154.9	24525.4	27165.5	37595.6	48393.7	29585.5	41701.1	55274.7	38700.1	28074.7	37988.5
10.82_590.3462m/z	590.346	10.8168	neg	LysoPC(20:3(5Z,8Z,11Z)/0:0)	HMDB0010393	61703	LMGP01050139	C04230	53480467	1199257-41-4	Lipids and lipid-like molecules	Glycerophospholipids	Glycerophosphocholines	***	70.5	94.8	M+FA-H	C28H52NO7P	-0.287455	1.82274	0.0080306	0.0722282	-1.65754	0.316978	4838.57	15264.7	3385.9	1799.68	1584.81	5665.16	11415.5	2404.29	7614.66	26573.6	12562.2	7224.07	20562.4	7067.16	22606	10257.2
9.51_493.2276m/z	493.228	9.50793	pos	Tfa-VAL-TYR-VAL-OH		44312			40785040	64577-63-5	Unclassified	Unclassified	Unclassified	*	39.1	0	M+NH4	C21H28F3N3O6	1.58488	1.81729	2.42472e-05	0.0150955	-31.6391	2.99003e-10	2.41397e-06	8073.41	2.41397e-06	2.41397e-06	2.41397e-06	2.41397e-06	2.41397e-06	2.41397e-06	2.41397e-06	3570.83	6644.34	10844.6	9670.83	11792.1	9598.72	4392.43
10.58_552.3307m/z	552.331	10.5811	neg	PC(17:1(9Z)/0:0)		76568	LMGP01050126		24779451		Lipids and lipid-like molecules	Glycerophospholipids	Glycerophosphocholines	***	54.4	75.1	M+FA-H	C25H50NO7P	0.0086989	1.81604	0.00306766	0.0563028	-1.47508	0.359712	5525.6	15361.2	2809.46	2269.53	3804.74	5247.58	15422	3362.24	5763.58	24605.6	15110.7	10399.8	19676	8903.85	15357.5	13474.6
0.71_163.1159m/z	163.116	0.708033	pos	(S1)-Methoxy-3-heptanethiol	HMDB0032380	88407			12009861	400052-49-5	Organic oxygen compounds	Organooxygen compounds	Ethers	*	37.2	0	M+H	C8H18OS	4.67273	1.80972	0.0057204	0.0637471	0.540679	1.45466	35475.7	24387.7	35344.1	27644.3	34388.8	40764.8	33001.6	31000.2	46186.2	21355.7	20776.8	31714.2	19714.5	34760.9	20335.4	22056.3
0.71_350.0847m/z	350.085	0.708033	pos	Acetaminophen glucuronide	HMDB0010316				83944	16110-10-4	Organic oxygen compounds	Organooxygen compounds	Carbohydrates and carbohydrate conjugates	*	37.4	0	M+Na	C14H17NO8	0.301465	1.80614	0.000526586	0.0364127	-1.63941	0.320987	4184.55	13036.5	998.727	3527.77	1335.52	8771.25	8810.18	3315.78	2532.61	13516.5	14122.7	18945.4	10790.4	15976.4	9916.81	7987.25
0.65_205.1548m/z	205.155	0.648267	pos	1-Hydroxy-2,2,5,5-tetramethylpyrrolidine-3-carboxylic acid	HMDB0243895				92169		Organoheterocyclic compounds	Pyrrolidines	Pyrrolidine carboxylic acids and derivatives	*	45.8	32.5	M+NH4	C9H17NO3	0.623561	1.78307	0.000706366	0.0400459	0.686574	1.60946	24810.4	15415.4	28107.1	20558.3	22628.5	25220.2	18324	27808.3	31026.5	13719.8	14215.3	19927.7	14778.3	19750.7	13054.1	12461.7
2.75_317.1153m/z	317.115	2.75287	pos	alhpa-tocopheronolactone		53844	LMPR02020063		52929836		Lipids and lipid-like molecules	Prenol lipids	Quinones and hydroquinones	*	38.7	0	M+K	C16H22O4	1.13776	1.77721	0.00929027	0.0756031	0.51454	1.42854	34905.6	24434.5	31708.3	32094.1	38239.5	37723.5	26240.7	41502	36831.4	19008	22854.8	28770	18968.8	39145.7	19947.8	22346.3
14.05_284.2947m/z	284.295	14.0485	pos	Enigmol		53958	LMSP01080058		11415391		Lipids and lipid-like molecules	Sphingolipids	Sphingoid bases	*	51.2	61.5	M+H-H2O	C18H39NO2	-0.159999	1.77673	0.0223671	0.104447	0.287497	1.22052	58418.8	47863.8	54447.3	55851.3	60053.5	59001.9	48289.8	63593.6	67694.1	41401.1	49989.6	54351.5	36402.8	61639.5	42377.6	48884.6
1.11_186.1006n	187.108	1.11178	pos	Alanylproline	HMDB0028695	85610			83525	13485-59-1	Organic acids and derivatives	Carboxylic acids and derivatives	Amino acids, peptides, and analogues	*	45	31	M+H-H2O, M+H	C8H14N2O3	0.931281	1.77654	5.15352e-05	0.020422	-1.55846	0.339514	3964.14	11675.9	3544.18	5690.07	3531.05	3049.11	4523.56	3647.24	3763.76	11019.9	9466.82	11708.5	16841.5	7810.3	15076.6	9807.76
10.59_337.1676m/z	337.168	10.5885	pos	Geissoschizoline		67507		C09197	442095	18397-07-4	Unclassified	Unclassified	Unclassified	*	39.4	0	M+K	C19H26N2O	-0.154699	1.76233	2.62861e-05	0.0150955	-6.47554	0.0112375	88.0307	7833.67	128.996	75.9379	23.385	64.9465	135.268	80.7747	106.907	4188.83	8312.49	12477.8	7630.92	10711.6	7522.2	3991.76
1.29_674.1292n	719.126	1.28923	neg	Adenosine thiamine diphosphate	HMDB0013647	85242			53481915		Nucleosides, nucleotides, and analogues	Purine nucleotides	Purine ribonucleotides	*	37.7	0	M-H2O-H, M+FA-H	C22H30N9O10P2S+	-2.83755	1.75934	0.000131185	0.0273998	-2.0927	0.234442	2624.34	11194	5885.47	2101.58	697.531	1897.46	6213.15	269.485	1305.69	8517.38	8003.74	13049	9801.3	14949.4	8304.07	15733
7.50_435.1674m/z	435.167	7.49575	pos	BM 567		45387			9866368	284464-77-3	Unclassified	Unclassified	Unclassified	*	37.8	0	M+Na	C18H28N4O5S	0.24506	1.75771	0.00163733	0.0483872	-31.7167	2.83344e-10	2.41397e-06	8519.6	2.41397e-06	2.41397e-06	2.41397e-06	2.41397e-06	2.41397e-06	2.41397e-06	2.41397e-06	2181.23	4470.66	15726.9	8492.29	14947.8	10889.5	2928.84
0.77_620.1013m/z	620.101	0.773817	neg	Cyanidin 3-(3'',6''-dimalonylglucoside)	HMDB0030096		LMPK12010138	C16289	23724697	171828-60-7	Phenylpropanoids and polyketides	Flavonoids	Flavonoid glycosides	*	51	65.7	M-H	C27H25O17+	-0.935027	1.75612	1.56567e-06	0.00454983	2.32112	4.99721	9639.66	1929.01	7748.5	8848.73	7011.39	8765.55	12555.4	10490	12058	846.172	3943.93	2110.01	1778.51	1867.39	1866.04	1091
0.57_657.3893m/z	657.389	0.571967	pos	PA(14:0/16:1(9Z))		82097	LMGP10010931		52929520		Lipids and lipid-like molecules	Glycerophospholipids	Glycerophosphates	*	38.7	0	M+K	C33H63O8P	0.121114	1.75406	0.048331	0.149571	0.787383	1.72594	28816	16695.8	17398	24364.9	27611.5	28469	13941.4	36724.6	53202.8	16542.3	7999.92	13941.5	19481.5	26293.1	10663.8	21948.7
9.73_445.3195n	446.327	9.73252	pos	(5Z,8Z,11Z,14Z,17Z)-Icosa-5,8,11,14,17-pentaenoylcarnitine	HMDB0241609						Lipids and lipid-like molecules	Fatty Acyls	Fatty acid esters	*	41.3	13.6	M+H, M+Na	C27H43NO4	0.629378	1.75308	0.0128746	0.0848169	1.65052	3.13947	15561.2	4956.64	23555.2	3833.44	11410.1	14583.9	6222.43	19735.5	29587.9	1261.75	5831.38	6509.85	2892.75	8224.77	5911.19	4064.77
4.64_188.1283m/z	188.128	4.64248	pos	(E)-2-Butenyl-4-methyl-threonine		69263		C12029	5282047	81135-57-1	Unclassified	Unclassified	Unclassified	*	56.6	85.7	M+H	C9H17NO3	0.77298	1.74577	0.026813	0.112754	0.302794	1.23353	60905.6	49375	58881.2	54256.1	65536.7	67169.1	49256.1	69879.2	61361.1	42934.6	46648.9	54831.5	43101.6	68918.3	42743	46447.2
0.75_559.0714n	558.064	0.7523	neg	Adenosine diphosphate ribose	HMDB0001178	6059		C00301	192	20762-30-5	Nucleosides, nucleotides, and analogues	Purine nucleotides	Purine nucleotide sugars	***	53.4	78.8	M-H, M+FA-H	C15H23N5O14P2	-0.431137	1.73527	0.0398092	0.135625	0.935117	1.91205	24498.3	12812.6	29424.9	28009.4	28454.5	18846.4	15559	40912.5	10281.4	2484.95	22775.6	18228.4	4825.04	23387.6	10304.1	7682.64
14.53_294.2428m/z	294.243	14.5264	pos	6,11-octadecadiynoic acid		74187	LMFA01030530		5312660		Lipids and lipid-like molecules	Fatty Acyls	Fatty Acids and Conjugates	*	38.7	0	M+NH4	C18H28O2	0.340975	1.73235	0.00749453	0.0699169	0.37538	1.29718	40864.1	31502.2	37111	41405.5	41997.9	41342.2	36057.8	46789.9	41344.1	29015.1	28805.2	37864.2	20569.5	41779.4	29876.1	32605.9
10.39_276.1727n	277.18	10.3875	pos	Cyclandelate	HMDB0015586	3970			2893	456-59-7	Benzenoids	Benzene and substituted derivatives	Unclassified	*	50.6	57.2	M+H-H2O, M+H	C17H24O3	0.439549	1.72906	0.001746	0.0492573	0.567836	1.4823	26073.4	17589.9	27575.8	23676.9	28796.9	26385.8	17447	30916	27715.5	16001.4	17982.3	20590.5	13465	23038.8	13892.8	18158.1
9.92_329.3295n	330.337	9.92267	pos	N,N-dimethyl-Safingol		53956	LMSP01080056		42608375		Lipids and lipid-like molecules	Sphingolipids	Sphingoid bases	*	52.5	66.7	M+H, M+Na	C20H43NO2	0.437872	1.72659	0.00244994	0.0520307	0.521768	1.43571	31463.2	21914.7	27327.2	26239.9	29047.7	39916.4	25353.5	39272.7	33085.2	21142.7	18590.7	21507.9	24217.4	26422	20867.7	20654.4
3.71_226.0719n	271.07	3.7123	neg	L-arogenate	HMDB0304400				74413465		Organic acids and derivatives	Carboxylic acids and derivatives	Amino acids, peptides, and analogues	*	39.2	0.513	M-H, M+FA-H	C10H12NO5-	1.43788	1.72427	0.0109371	0.0797321	-0.542178	0.686733	23159.7	33724.5	17318.2	18872.1	32747.2	25353	21337.7	30824.4	15665.8	30106.3	37693.8	29437.2	36610.9	24001.8	43752.8	34468.8
0.83_235.1059n	258.095	0.82825	pos	(2R,3R,4R,5R)-2-Amino-4,5,6-trihydroxy-3-[(2R)-1-oxopropan-2-yl]oxyhexanal	HMDB0255309						Organic oxygen compounds	Organooxygen compounds	Carbohydrates and carbohydrate conjugates	*	48.9	51.1	M+Na, M+K, M+H-H2O	C9H17NO6	1.39463	1.71473	0.00190833	0.0498158	1.08789	2.12563	17032.4	8012.89	9266.17	12214.2	12829.7	17085.5	24756.9	22707.3	20367.2	8186.4	10288.9	6132.5	8970.12	6152.32	7473.45	8886.5
1.11_202.1320n	203.139	1.11178	pos	Isoleucyl-Alanine	HMDB0028900	85806			5246009		Organic acids and derivatives	Carboxylic acids and derivatives	Amino acids, peptides, and analogues	*	45.6	33.8	M+H-H2O, M+H	C9H18N2O3	1.24601	1.70946	1.42869e-05	0.013905	-1.08908	0.47006	6504.39	13837.4	9743.82	7577.55	6141.57	5035.12	6226.18	6291.77	4514.72	18343.2	11578.1	13607.5	14250.6	13348.3	13243	12490.7
0.83_171.0897n	189.124	0.82825	pos	N-[(3s)-2-Oxotetrahydrofuran-3-Yl]butanamide	HMDB0247190	36732		C11837		67605-85-0	Organic acids and derivatives	Carboxylic acids and derivatives	Amino acids, peptides, and analogues	*	47.2	40.7	M+H, M+NH4	C8H13NO3	0.974654	1.69915	0.0208473	0.10155	-0.562366	0.677191	19578.2	28911	16815	17143.8	19179.9	18743.6	15246.8	24010.4	25908	35873.7	18493	31085.3	43117.5	23026.6	26314.1	24466.4
1.22_321.1538n	339.193	1.22138	pos	6'-Dehydro-6'-oxoparomamine		71792		C17583	46173949		Unclassified	Unclassified	Unclassified	*	37.5	0	M+H-H2O, M+NH4	C12H23N3O7	0.766887	1.69682	0.0169191	0.0937703	-1.25415	0.419241	6498.33	15500.2	3852.05	8493.06	7558.73	5105.6	8187.93	6260.86	6030.06	23150.8	12938.1	13281.1	29688.9	5047.16	15628	8767.45
10.88_204.1385m/z	204.138	10.8797	pos	(all-E)-3,5,7-Tridecatriene-9,11-diyn-1-ol	HMDB0038526	93201			131752390		Lipids and lipid-like molecules	Fatty Acyls	Fatty alcohols	*	44.3	27.6	M+NH4	C13H14O	1.05284	1.69674	0.00486624	0.0616794	0.601482	1.51727	26056.5	17173.3	23785.7	25476.8	27106.7	25602.3	18878.9	31176.5	30368.7	12088.6	18754.9	21969.7	11198.6	26065.5	15917.1	14218.3
2.58_282.9868m/z	282.987	2.58245	neg	Malathion monocarboxylic acid	HMDB0060626				3032927		Lipids and lipid-like molecules	Fatty Acyls	Fatty acids and conjugates	*	37.4	0	M-H2O-H	C8H15O6PS2	-0.407652	1.69349	0.00157191	0.0479415	-2.16602	0.222824	2455.57	11020.2	2027.14	1090.11	836.843	4618.66	2252.09	1809.63	4554.52	20765.6	7001.2	11105.4	12481.6	3680.63	9435.79	12671.5
8.39_318.2196n	319.227	8.39485	pos	11(12)-EpETE		36080	LMFA03000002		16061087	504435-15-8	Lipids and lipid-like molecules	Fatty Acyls	Eicosanoids	*	53.2	71.8	M+H-H2O, M+H	C20H30O3	0.454033	1.68859	0.0272394	0.113596	-0.991252	0.503041	9541.96	18968.5	4543.74	11704.1	6573.81	12341.3	12696.8	5967.28	12966.7	22652.6	10170.2	19914.4	36879.5	11529.8	12487.7	19145.6
3.45_184.0582m/z	184.058	3.446	pos	Acetylhomoserine	HMDB0029423	3282		C01077	528	7540-67-2	Organic acids and derivatives	Carboxylic acids and derivatives	Amino acids, peptides, and analogues	*	38.8	0	M+Na	C6H11NO4	1.20252	1.68424	0.00767512	0.0706595	0.480559	1.39528	32866	23555	27937.4	30408.1	35639.5	37793.9	25614.1	37079.8	35589.2	19428.7	22220.5	28392.3	18778.2	34956.8	19300.8	21808
0.71_593.1567m/z	593.157	0.71145	neg	Carboxydextran	HMDB0249656						Lipids and lipid-like molecules	Fatty Acyls	Fatty acyl glycosides	*	38.2	0	M+FA-H	C19H32O18	-0.656535	1.68314	0.00572053	0.0637471	1.97652	3.93544	12877.3	3272.14	18641.2	16788.4	5628.33	7418.86	23875.4	5152.21	12636.7	6422.51	3388.49	1068.93	3345.55	610.07	1852.52	6216.89
1.38_294.1549m/z	294.155	1.37563	pos	N-(1-Deoxy-1-fructosyl)leucine	HMDB0037840	92648			131752244	34393-18-5	Organic acids and derivatives	Carboxylic acids and derivatives	Amino acids, peptides, and analogues	***	50.6	67.2	M+H	C12H23NO7	0.662921	1.6828	0.00426496	0.0598742	-1.24729	0.421238	6468.97	15357	3111.64	6371.06	7244.01	5969.44	9765.78	5924.7	6896.14	25439.1	14728.7	8787.61	22188.4	8439.2	13099.7	14816.6
14.14_120.1022m/z	120.102	14.1369	pos	3-Hydroxy-3-methylbutan-2-one		98110	LMFA12000066		8261		Lipids and lipid-like molecules	Fatty Acyls	Oxygenated hydrocarbons	*	42.7	19.7	M+NH4	C5H10O2	2.57002	1.68114	0.0185284	0.0974839	0.369866	1.29223	44598.8	34512.9	40900.1	40258.5	45595.6	46986.8	36655.2	51548.8	50246.3	29121.6	33223.4	42475.5	26816.1	48912.5	29687.7	31353.8
11.23_580.3616m/z	580.362	11.2341	neg	PC(18:0(11cp)/0:0)			LMGP01050145		15515616		Lipids and lipid-like molecules	Glycerophospholipids	Glycerophosphocholines	*	57.7	96	M+FA-H	C27H54NO7P	-0.704655	1.68028	0.00961598	0.0761072	-1.36693	0.387716	6563.04	16927.4	5159.21	3554.92	2716.7	7082.08	12136.7	6196.94	9094.7	30444.1	20956.7	8273.61	18113.5	5622.51	15364.5	19717
11.04_387.2152m/z	387.215	11.039	neg	Adenosine, 8-(butylamino)-N-cyclopentyl-	HMDB0258096				44282877		Nucleosides, nucleotides, and analogues	Purine nucleosides	Unclassified	*	42.6	17.7	M-H2O-H	C19H30N6O4	0.375246	1.67467	0.048605	0.149965	0.356509	1.28032	47621	37194.5	51408	45856.7	33965	43952.8	49950	41908.9	66305.3	32845.4	34792.7	31705.2	34321.5	35297.1	37571.9	53827.4
1.11_188.0919m/z	188.092	1.11178	pos	N-(3-hydroxy-butanoyl)-homoserine lactone			LMFA08030029		10330086		Lipids and lipid-like molecules	Fatty Acyls	Fatty amides	*	45.3	31.6	M+H	C8H13NO4	1.01229	1.67062	0.00175072	0.0492573	-2.43553	0.184855	2034.51	11006	1982.9	1807.23	834.069	3598.32	3494.92	1458.95	1065.16	19298	15713.5	6147.93	12219	2167.32	8589.07	12906.9
9.84_208.1828n	209.19	9.84157	pos	2-Cyclotetradecen-1-one	HMDB0039884	94428			6365540	55395-12-5	Organic oxygen compounds	Organooxygen compounds	Carbonyl compounds	*	47.6	41.1	M+H-H2O, M+H	C14H24O	0.630874	1.66565	0.0494162	0.150844	0.717895	1.64478	25585.2	15555.4	28833.6	35722.4	10613.1	14131.2	34826	23315.1	31655	17462.9	21408.5	13066.4	7160.59	12774.7	9879.2	27135.5
0.71_225.0615m/z	225.062	0.71145	neg	D-Mannose	HMDB0000169			C00936	185698	3458-28-4	Organic oxygen compounds	Organooxygen compounds	Carbohydrates and carbohydrate conjugates	***	52.7	65.9	M+FA-H	C6H12O6	-0.446151	1.65188	4.91774e-05	0.0204156	0.83957	1.78952	17263.5	9647	17743.6	19700	16811.4	19234.8	15388.2	19866.2	12100.2	9165.78	9797.86	12602.7	10652.5	9754.96	8030.88	7524.41
8.72_210.1159n	233.105	8.71682	pos	N-ethyl phenazine	HMDB0255130				15309770		Organoheterocyclic compounds	Diazanaphthalenes	Benzodiazines	*	39	0	M+NH4, M+Na, M+H	C14H14N2	1.08663	1.65001	0.00114599	0.0437167	-15.1969	2.66236e-05	0.195724	7351.53	2.41397e-06	0.242881	0.218881	0.316473	2.41397e-06	0.153292	0.438536	2089.54	3922.25	12822.7	9136.96	13325.4	7038.05	3125.79
1.09_518.1841n	563.183	1.0895	neg	Ciceritol	HMDB0032777	88704			10142653	88167-26-4	Organic oxygen compounds	Organooxygen compounds	Carbohydrates and carbohydrate conjugates	*	44.3	27.9	M-H, M+FA-H	C19H34O16	-1.2115	1.63884	0.00160914	0.0481253	3.24099	9.45442	9316.49	985.411	20205.4	9116.5	9531.4	3558.17	10625.9	6227.91	5950.13	1646.33	1597.29	275.784	1382.93	2.41397e-06	348.668	1646.87
6.31_329.2567n	352.246	6.30668	pos	4,8 Dimethylnonanoyl carnitine	HMDB0006202	58362	LMFA07070046		53477801		Lipids and lipid-like molecules	Fatty Acyls	Fatty acid esters	*	39.3	0	M+Na, M+K, M+H-H2O	C18H35NO4	0.280923	1.63871	0.0082386	0.0724921	0.27567	1.21056	52302.3	43205.2	43760.6	51047.8	49306.5	56175.4	50815.6	57475	57535.1	39230.8	40752.2	50245	38310.7	52404.6	39901	41592
12.93_507.2395m/z	507.24	12.9278	pos	Flemichin E		52994	LMPK12140512		42608043		Lipids and lipid-like molecules	Polyketides	Flavonoids	*	48.3	48.6	M+H	C30H34O7	3.50333	1.62809	0.0419383	0.139434	1.13304	2.19321	20470.9	9333.75	33723.5	28395.7	13125.2	7928.88	27073.5	28121.1	4928.14	7285.48	4688.75	3763.78	11919	4100.09	14584.6	18994.5
12.33_325.2982n	326.305	12.3305	pos	Oleoylethanolamide	HMDB0002088	24103	LMFA08040015		5283454	111-58-0	Organic nitrogen compounds	Organonitrogen compounds	Amines	***	76	85.6	M+H, M+Na	C20H39NO2	0.428267	1.62303	0.0130575	0.0852866	-2.30046	0.202999	2369.49	11672.5	1982.12	1886.82	2959.69	1984.36	4018.8	2428.12	1326.54	17844.8	12569.2	3030.65	24431.3	2013.33	5740.16	16077.8
0.83_188.0919m/z	188.092	0.82825	pos	3,4-Dihydroxyphenylglycol	HMDB0000318	5307		C05576	91528	28822-73-3	Benzenoids	Phenols	Benzenediols	**	41.4	13.3	M+NH4	C8H10O4	1.182	1.60832	0.00807563	0.0724163	-1.7356	0.300284	3892.64	12963.2	3873.43	3261.37	2077.63	5149.9	6060.03	3113.82	3712.26	24286.2	13257.7	6046.17	17921.6	2982.86	9064.23	17183.4
1.58_398.1185n	795.23	1.57638	neg	Picraquassioside A	HMDB0041285	95699			85502992	169312-28-1	Organic oxygen compounds	Organooxygen compounds	Carbohydrates and carbohydrate conjugates	*	37.8	0	M-H, 2M-H	C18H22O10	-6.95443	1.59319	0.0417651	0.139158	0.911976	1.88162	22301.7	11852.4	31853.6	17377.2	28443	29632.6	10705.9	29631.8	8468.04	4826.52	19911.8	23253.1	6167.39	8272.43	9240.42	11295.2
0.69_445.0533m/z	445.053	0.690683	neg	CDP-ethanolamine	HMDB0001564	3538		C00570	123727	3036-18-8	Nucleosides, nucleotides, and analogues	Pyrimidine nucleotides	Pyrimidine ribonucleotides	*	46.9	40.3	M-H	C11H20N4O11P2	0.507257	1.59042	0.00442587	0.0604623	1.10689	2.15381	14937	6935.17	16845.5	16753.6	18936.7	13284.6	7615.52	20765.5	10357.8	2435.19	10287.8	11164.3	3881.74	10893	6300.25	3583.88
4.51_242.0922n	243.099	4.51315	pos	beta-Lapachone	HMDB0249138	68281		C10367	3885	4707-32-8	Organoheterocyclic compounds	Naphthopyrans	Naphthopyranones	*	43.5	35.8	M+H, M+Na	C15H14O3	-8.80019	1.58504	0.0377286	0.131962	0.268297	1.20439	57879	48056.9	55033.7	54709.6	59471.8	64594.5	45985.7	68879.7	56478	46229.5	39749.4	53973	42860.8	62334	40014.5	51236.9
12.58_353.1424m/z	353.142	12.5799	neg	4-Amino-8-(2-fluoro-6-methoxyphenyl)-N-propylcinnoline-3-carboxamide	HMDB0248777				23581869		Organoheterocyclic compounds	Diazanaphthalenes	Benzodiazines	*	41.1	9.5	M-H	C19H19FN4O2	1.33964	1.58078	0.00952907	0.0760406	-1.01892	0.493485	9336.24	18919	6082.17	7039.21	9556.6	9432.08	11691.8	6599.69	14952.1	30677.1	20794.6	9982.43	18838.5	9246.04	18451.7	24442.7
0.75_597.0970m/z	597.097	0.7523	neg	Phosphocreatine lactate	HMDB0256473				129716747		Organic acids and derivatives	Carboxylic acids and derivatives	Amino acids, peptides, and analogues	*	38	0	2M-H	C7H14N3O8P	0.990006	1.5787	0.00495595	0.0617697	1.43691	2.70739	13188.7	4871.36	24116.3	11988	13147.4	13801.7	15311.7	6935	7020.76	7295.1	5427.98	1200.28	6399.94	2888.82	2526.37	8361.01
1.23_365.0593m/z	365.059	1.23138	neg	2-[1-(2-Fluorophenyl)ethylamino]-5-methyl-5-(trifluoromethyl)-1,3-thiazol-4-one	HMDB0257685				136380052		Benzenoids	Benzene and substituted derivatives	Halobenzenes	*	38	0.285	M+FA-H	C13H12F4N2OS	1.32636	1.57136	0.0115415	0.081275	1.19992	2.29727	16054.1	6988.33	16664.6	19782.2	21170.9	16272.9	10967.1	21192	6328.89	1870.99	4972.43	16058.9	1833.91	13875.7	7246.55	3059.76
7.29_401.0875m/z	401.088	7.29388	neg	Isokanugin		51147	LMPK12112733		386324		Lipids and lipid-like molecules	Polyketides	Flavonoids	*	52	64.7	M+FA-H	C19H16O7	-0.851713	1.56569	0.0145561	0.0880376	0.454567	1.37037	31256.2	22808.6	32482.2	30962.6	37807.4	27288.2	22546.2	36768.5	30938.1	16037.7	22077.3	24956.4	19443.5	34430.3	21648.3	21066.5
1.38_446.1951n	491.193	1.38147	neg	Estrone glucuronide	HMDB0004483	7063	LMST05010011	C11133	115255	2479-90-5	Lipids and lipid-like molecules	Steroids and steroid derivatives	Steroidal glycosides	*	41.9	17.7	M-H, M+FA-H	C24H30O8	2.34152	1.56368	0.00354245	0.0572147	-1.13924	0.453998	6388.61	14071.9	6197.07	4953.75	7509.37	6134.51	7528.81	9585.58	2811.21	14896.6	15986.6	10237.7	20245.4	4372.43	16334.9	16429.7
2.85_270.0114n	315.01	2.85367	neg	3,5-Dinitro-4-hydroxyphenylpyruvate		66154		C04286	440284		Unclassified	Unclassified	Unclassified	*	38.5	0	M-H, M+FA-H	C9H6N2O8	-3.70881	1.56117	0.00177589	0.0495432	-3.48978	0.0890165	731.037	8212.39	264.42	123.637	16.8114	2036.77	1544.51	46.5832	1084.53	15749.9	4732.12	6152.07	10669.3	1511.72	6458.04	12213.5
0.77_189.0871m/z	189.087	0.76685	pos	gamma-Glutamylacetamide	HMDB0252618				76082401		Organic acids and derivatives	Carboxylic acids and derivatives	Amino acids, peptides, and analogues	*	43.4	22.1	M+H	C7H12N2O4	0.740231	1.55941	0.00519401	0.0625585	1.51033	2.84875	12870.2	4517.83	10624.8	14310.8	16217.3	16349.3	2326.4	16851.3	13411.3	606.506	1518.72	10533.3	5336.64	8889.45	3962.49	777.735
10.09_208.1828n	191.18	10.0859	pos	5,8-tetradecadienal		75358	LMFA06000082		5283369		Lipids and lipid-like molecules	Fatty Acyls	Fatty aldehydes	*	46.6	36.3	M+H-H2O, M+H	C14H24O	0.560436	1.5594	0.0308905	0.119783	0.759772	1.69322	21138.4	12484.1	19528.9	24281.6	25475.7	12508.2	15555.1	20878.3	29740.9	27940.5	14122.1	10617.6	5834.87	9975.8	8634.09	10263.9
13.36_347.3157m/z	347.316	13.3614	pos	1-O-(2R-methoxy-hexadecyl)-sn-glycerol			LMGL01020039		14582682		Lipids and lipid-like molecules	Glycerolipids	Monoradylglycerols	*	43.1	20.9	M+H	C20H42O4	0.258389	1.5549	0.00820178	0.0724921	0.33236	1.25907	39819.6	31626.1	38446.8	36499.2	41822.4	46493.8	32873.1	39139	43462.8	30324.4	32215.5	35943.4	28322.6	40655.5	25953.8	27967.8
4.62_211.1442m/z	211.144	4.62022	pos	Isoleucylproline	HMDB0011174	62022			444876	37462-92-3	Organic acids and derivatives	Carboxylic acids and derivatives	Amino acids, peptides, and analogues	*	54.7	79.2	M+H-H2O	C11H20N2O3	0.501287	1.55447	0.00547543	0.0629082	1.6639	3.16871	12337.3	3893.47	17862.2	5242.61	8227.89	7550.78	23045.9	9421.21	15010.4	3155.96	4584.97	4090.72	2709.06	6578.83	3389.38	2745.36
3.37_409.2260n	432.215	3.37103	pos	Acidissiminol epoxide	HMDB0040793	95258			5363185	139165-01-8	Benzenoids	Benzene and substituted derivatives	Benzoic acids and derivatives	*	39.4	16.7	M+H, M+Na	C25H31NO4	1.64413	1.55288	0.0298601	0.118139	0.537887	1.45184	28012.5	19294.4	37623.8	31014	34645.6	14377.5	21470	30599	26357.3	13282.7	25373.3	22505.1	13917.5	16048.8	23616.3	20317.1
0.63_130.0825n	148.116	0.628083	pos	3-Methylcyclohexanethiol	HMDB0031537	87746			21259899	38699-50-2	Organosulfur compounds	Thiols	Alkylthiols	*	36	0	M+H, M+NH4	C7H14S	6.95557	1.55097	0.0209204	0.101635	0.546825	1.46087	32758.7	22424.2	34505.5	22749.9	32403.9	31472.7	24603.3	35887.9	47687.9	24671	18341.3	24427.2	34487.5	18720.4	20403.3	15918.4
7.40_446.1216n	469.111	7.40428	pos	Isokaempferide 7-rhamnoside			LMPK12112670				Lipids and lipid-like molecules	Polyketides	Flavonoids	*	39.7	3.28	M+H-H2O, M+Na, M+H	C22H22O10	0.61932	1.54935	0.000477728	0.0359169	0.414572	1.3329	25279.4	18965.7	23276.3	25211.4	25532.8	25087.6	23163.2	25697.8	28986.6	16491.2	19240.9	19379.6	15534.7	24389.8	17391.8	20331.6
14.56_100.0761m/z	100.076	14.5608	pos	2,5-Dihydro-2,4-dimethyloxazole	HMDB0040518	95009			53654	77311-02-5	Organoheterocyclic compounds	Azolines	Oxazolines	*	46.9	41.6	M+H	C5H9NO	4.63686	1.54279	0.0192344	0.0987549	0.299254	1.23051	45768.5	37194.8	41949.3	43276.7	47274	47648	38884.6	52326.8	49020.5	33683.8	35092.3	44729.7	30730	49339.2	32054.6	34734.4
12.84_356.2928n	339.289	12.8415	pos	MG(0:0/18:1(11Z)/0:0)	HMDB0011536	62320			53480961		Lipids and lipid-like molecules	Glycerolipids	Monoradylglycerols	***	69	77.7	M+H-H2O, M+H	C21H40O4	0.322558	1.54101	0.0143193	0.087696	-1.73729	0.299932	3686.04	12289.6	2795.67	1754.69	2367.93	5612.32	9091.83	1217.44	2962.42	26201.5	14118.7	4946.27	15002.4	4060.24	9456.59	12241.4
11.31_198.0174m/z	198.017	11.3062	pos	1,N6-Ethenoadenine	HMDB0244259	424740			104994		Organoheterocyclic compounds	Imidazopyrimidines	Purines and purine derivatives	*	38.2	0	M+K	C7H5N5	-1.90549	1.5266	0.0369048	0.130337	0.354362	1.27842	40054.8	31331.5	39679.2	40472.4	43856.6	38912.6	27517.1	49271.9	40673.8	26416.1	34088.3	39674.3	23178.1	42008.6	26032.1	27922.8
2.59_99.0087m/z	99.0087	2.58922	neg	Succinic anhydride	HMDB0032523	24050		C19524	7922	108-30-5	Organic acids and derivatives	Carboxylic acids and derivatives	Dicarboxylic acids and derivatives	*	54.2	73.9	M-H	C4H4O3	-0.872396	1.52381	0.00182651	0.0496567	-1.24939	0.420627	5022.67	11940.9	4580.5	3803.29	3669.31	7029.81	4609.14	4822.62	6644	19974.6	8347	12480.5	13432.7	6183.54	10329	12839
1.15_180.0666m/z	180.067	1.15257	neg	L-Tyrosine	HMDB0000158	34		C00082	6057	60-18-4	Organic acids and derivatives	Carboxylic acids and derivatives	Amino acids, peptides, and analogues	***	61	98.4	M-H	C9H11NO3	-0.237937	1.52235	0.00059812	0.0380108	-0.712906	0.61009	9935.79	16285.8	9954.68	10702.5	10383.3	7871.25	12112.1	11564.8	6961.96	15538.1	16929.6	13063	21985.4	12759.1	17692.3	16032.9
5.46_415.1968n	396.179	5.46257	neg	Alpinine		328896		C09331	442162	14028-90-1	Unclassified	Unclassified	Unclassified	*	36.3	0	M-H2O-H, M-H	C23H29NO6	-6.39359	1.51944	0.0204325	0.100687	1.31822	2.49358	14232.8	5707.76	28305.3	18227.5	8933.73	5375.9	15345	15628.3	7813.8	8901.49	2942.56	1871.15	4737.49	3615.82	7420.66	10465.2
9.91_512.2990m/z	512.299	9.91098	neg	LysoPC(14:0/0:0)	HMDB0010379	61689	LMGP01050012	C04230	460604	20559-16-4	Lipids and lipid-like molecules	Glycerophospholipids	Glycerophosphocholines	***	78.6	98.2	M+FA-H	C22H46NO7P	-0.761151	1.51935	0.0201034	0.100035	-1.20997	0.432277	6686.19	15467.4	2406.77	1504.37	5293.81	2498.61	22697.1	1974.99	10427.7	16043.8	23303	14149.1	15783	11134.8	12024.3	15833.5
9.21_379.2488m/z	379.249	9.2077	neg	Asterogenol		84301	LMST02030211		3086044		Lipids and lipid-like molecules	Steroids and steroid derivatives	Steroids	*	46.3	40.1	M+FA-H	C21H34O3	-0.607876	1.51786	0.0421789	0.139615	-1.18953	0.438446	6236.32	14223.7	2497.95	6260.59	2932.11	11271.8	8650.43	2839.37	9202	27258.2	5560.32	13975.5	25204.7	8875.59	9699.26	8992.18
14.53_296.2584m/z	296.258	14.5264	pos	10,12,15-octadecatrienoic acid		34826	LMFA01030156		5282824		Lipids and lipid-like molecules	Fatty Acyls	Fatty Acids and Conjugates	*	46.7	47.2	M+NH4	C18H30O2	0.140433	1.51659	0.00629005	0.0659267	0.449627	1.36569	25531.9	18695.3	23252.8	26096.6	24872.7	28543	22401.5	28697.1	24859.7	17707.6	19110.6	22880.8	9004.31	23877.9	17615.8	20670
6.85_225.1024m/z	225.102	6.85322	pos	3-Amino-4-methoxybenzanilide	HMDB0245807	325357			8426		Benzenoids	Benzene and substituted derivatives	Anilides	*	44.5	25.6	M+H-H2O	C14H14N2O2	0.531115	1.51078	0.000513496	0.0364127	2.42002	5.35178	8046.88	1503.59	4445.78	5538.65	8270.29	8834.5	5655.96	8636.47	14946.5	232.58	573.402	2646.26	1484.44	3188.67	1893.74	506.03
11.31_558.3533m/z	558.353	11.3062	pos	PC(O-16:0/3:1(2E))		40097	LMGP01020070		195806		Lipids and lipid-like molecules	Glycerophospholipids	Glycerophosphocholines	*	38.2	0	M+Na	C27H54NO7P	0.470535	1.50802	0.0113528	0.0807976	-2.49746	0.177089	1808.91	10214.7	1396.53	1023.23	986.729	1768.91	6565.15	243.77	678.048	22499	10638.6	2523.93	11610.7	1532.21	8627.15	14071.3
9.95_360.2302n	383.219	9.94918	pos	7,9,13,17-tetramethyl-7S,14S-dihydroxy-2E,4E,8E,10E,12E,16-octadecahexaenoic acid		45769	LMFA01020290		52921725		Lipids and lipid-like molecules	Fatty Acyls	Fatty Acids and Conjugates	*	45.8	36.5	M+H-H2O, M+Na	C22H32O4	0.280006	1.50245	0.048961	0.150423	-1.13457	0.455471	6246.15	13713.6	2613.82	6591.46	2540.85	11924.3	8793.74	2443.66	8815.24	17923.9	3696.49	17179.8	28395.5	11386.5	8862.86	8550.1
0.63_430.1412m/z	430.141	0.628083	pos	Flavoxate	HMDB0015279	66745		C07809	3354	15301-69-6	Phenylpropanoids and polyketides	Flavonoids	Flavones	*	37	8.98	M+K	C24H25NO4	-0.760222	1.50138	0.0262855	0.111839	1.66489	3.1709	11599.7	3658.18	11761.2	10386	13130.3	9381.55	582.246	25575.1	10381.6	523.858	6052.41	2361.85	609.448	11155.1	2861.51	2043.02
5.32_242.0805n	243.088	5.31515	pos	Lumichrome	HMDB0254199	64742		C01727	506	1086-80-2	Organoheterocyclic compounds	Pteridines and derivatives	Alloxazines and isoalloxazines	***	56.7	68.8	M+H, M+Na	C12H10N4O2	0.514597	1.48139	0.00331957	0.0569514	0.88099	1.84164	15666.1	8506.59	6639.56	14442.4	15062.3	19510.3	14404.9	21976.4	17626.5	8178.81	6443.67	9708.8	9600.35	11250.7	7377.67	6986.12
0.65_174.1115n	173.104	0.646067	neg	L-Arginine	HMDB0000517	5502		C00062	6322	74-79-3	Organic acids and derivatives	Carboxylic acids and derivatives	Amino acids, peptides, and analogues	***	63.6	95.7	M-H, 2M-H	C6H14N4O2	-0.730609	1.47806	0.0247691	0.109114	0.54113	1.45511	27979	19228.1	39838.4	24039	30563.6	21255.9	21765.4	39444.2	18946.6	20253.7	19022	19456.3	22933.2	19440.2	15773.1	17718.1
11.11_466.2936m/z	466.294	11.1128	neg	1-Heptadecanoylglycerophosphoethanolamine	HMDB0061691	77696	LMGP02050030		52925149		Lipids and lipid-like molecules	Glycerophospholipids	Glycerophosphoethanolamines	***	66.3	90.9	M-H	C22H46NO7P	-0.746475	1.47631	0.0328692	0.123355	-0.907614	0.533066	8414.81	15785.7	6453.44	7061.45	6123.79	10832.4	16296	6730.15	5406.52	24642	10260.6	13328.9	26687.5	14327.6	8110.8	13142.4
4.72_277.0327m/z	277.033	4.72107	neg	(R)-3-Amino-2-fluoropropyl phosphenite	HMDB0248770				76419056		Organic oxygen compounds	Organic oxoanionic compounds	Unclassified	*	39.8	7.32	2M-H	C3H7FNO2P	1.17241	1.47271	0.0257888	0.110889	0.533464	1.4474	26282.3	18158.3	28776.4	25731.1	30332.7	27096.2	18902.3	35254.9	17882.6	12338.7	18714.7	21664.1	12850.9	29004.8	16414.9	16119.9
9.23_361.1631m/z	361.163	9.22802	neg	Thyrotropin-releasing factor	HMDB0259062				32281		Organic acids and derivatives	Carboxylic acids and derivatives	Amino acids, peptides, and analogues	*	44.3	25	M-H	C16H22N6O4	0.46519	1.47176	0.02973	0.117895	0.426524	1.34399	31504.8	23441.2	33322.6	25249.8	34086.3	24452	30227.4	38662.1	34533.2	11670.6	27292.4	21438.8	22289.9	34817.9	23564.3	23014.4
10.81_387.0988n	410.088	10.8133	pos	Pyraclostrobin	HMDB0256940	72366		C18561	6422843	175013-18-0	Organoheterocyclic compounds	Azoles	Pyrazoles	*	49.1	59.1	M+H, M+Na	C19H18ClN3O4	0.593407	1.46991	9.60536e-05	0.0242723	1.61594	3.06512	7859.58	2564.2	5531.09	6202.17	9193.53	8513.26	7787.02	8941.02	8848.97	2046.95	5669.5	2067.85	542.767	1672.85	963.305	4986.16
0.73_97.0289m/z	97.0289	0.72705	pos	2-Furancarboxaldehyde	HMDB0032914	69936		C14279	7362	98-01-1	Organic oxygen compounds	Organooxygen compounds	Carbonyl compounds	*	41.5	16	M+H	C5H4O2	5.45229	1.46963	0.00687583	0.0676945	0.712133	1.63822	18947	11565.6	24519.2	14671	14192.1	19897.8	25304.7	12381.2	21662.8	15911.1	10344.8	9190.22	11602.4	10663.9	8071.87	15174.7
11.74_275.2014m/z	275.201	11.735	neg	Stearidonic acid	HMDB0006547	34838	LMFA01030357	C16300	5312508	20290-75-9	Lipids and lipid-like molecules	Fatty Acyls	Lineolic acids and derivatives	***	55.7	57.9	M-H	C18H28O2	-1.0218	1.46893	0.0368993	0.130337	-0.891552	0.539034	11325.3	21010.5	9580.07	8085.83	9100.67	13308.4	15377.9	9259.71	14564.8	40985.5	18714.5	11198.6	20774.6	12108.7	15288.5	28002.8
9.13_172.1697m/z	172.17	9.12665	pos	p-Menth-cis-2-en-1-ol	HMDB0302613				526657		Lipids and lipid-like molecules	Prenol lipids	Monoterpenoids	*	41.7	19.6	M+NH4	C10H18O	0.651316	1.45723	0.0289892	0.11708	0.34824	1.27301	33665.6	26445.8	30336.7	31468.4	36922.2	35062.2	28536.2	40182.4	33151.4	20804.5	25389.7	26725.7	19217.8	38310.8	23399.2	31272.8
12.58_254.2244n	253.217	12.5799	neg	Palmitoleic acid	HMDB0003229	188	LMFA01030056	C08362	445638	373-49-9	Lipids and lipid-like molecules	Fatty Acyls	Fatty acids and conjugates	***	55.2	43.1	M-H, M+FA-H	C16H30O2	-0.593225	1.45378	0.00665132	0.0669145	-1.063	0.478635	7094.45	14822.3	5030.55	5326.48	8965.41	7874.48	9703.84	4982.7	7777.71	23685.8	15743.4	7175.65	14284	7663.92	15887.5	19315.5
0.75_217.0297m/z	217.03	0.7523	neg	Coumestan	HMDB0250498				638309		Phenylpropanoids and polyketides	Isoflavonoids	Coumestans	*	37.6	0	M-H2O-H	C15H8O3	0.732235	1.44909	0.000524572	0.0364127	-0.761756	0.589778	8186.04	13879.9	4978.9	7950.31	9584.44	10693.4	11975.5	7719.23	4400.47	14042.9	14280.6	13633.1	13876.6	16394.9	13857.8	11073.3
0.65_355.0579m/z	355.058	0.648267	pos	2'-Phosphophloretin	HMDB0245540				9798663		Phenylpropanoids and polyketides	Linear 1,3-diarylpropanoids	Chalcones and dihydrochalcones	*	37.6	0	M+H	C15H15O8P	0.543613	1.44667	1.76114e-05	0.0139578	1.54283	2.91366	8045.88	2761.44	9352.96	7856.75	6672.55	8496.46	4876.72	10879.1	8186.57	3203.68	2094.39	2348.25	2944.04	3520.99	1722.84	3495.85
1.11_260.1971m/z	260.197	1.11178	pos	Lysylleucine	HMDB0028955	85857			7016103	7369-79-1	Organic acids and derivatives	Carboxylic acids and derivatives	Amino acids, peptides, and analogues	***	52.8	69.8	M+H	C12H25N3O3	0.934135	1.44469	0.00823859	0.0724921	-1.86481	0.27456	2490.57	9071.12	3384.12	3037.65	1895.87	916.55	5234.29	1447.81	1517.69	13612.6	9123.26	3976.78	15824	1079.57	12309.5	7572.1
0.75_608.2398m/z	608.24	0.745533	pos	Bluensomycin		71784		C17573	20055290	11011-72-6	Unclassified	Unclassified	Unclassified	*	37.6	0	M+Na	C21H39N5O14	2.15836	1.43699	0.0152467	0.0895956	2.21387	4.63918	9652.9	2080.73	10676.4	6161.92	6384.75	8441.28	6505.53	5322.14	24078.3	4237.81	1505.02	2.41397e-06	6675.22	2.41397e-06	2.41397e-06	2147.09
4.28_165.0192m/z	165.019	4.27607	neg	Phthalic acid	HMDB0002107	6489		C01606	1017	88-99-3	Benzenoids	Benzene and substituted derivatives	Benzoic acids and derivatives	***	48.5	45.7	M-H	C8H6O4	-0.64217	1.42981	0.0290459	0.117138	0.444515	1.36086	30195	22188.2	31058.4	32805.3	36701.6	31342.6	23375.7	35791.3	20289.9	15084.1	22313.3	26543.1	18298.2	33013.7	20310.9	19754.2
4.14_500.2361m/z	500.236	4.13667	neg	20-Hydroxy-leukotriene E4	HMDB0012639	36255	LMFA03020025	C03577	5280606	111844-33-8	Lipids and lipid-like molecules	Fatty Acyls	Eicosanoids	*	36.2	0	M+FA-H	C23H37NO6S	8.22151	1.42791	0.00462454	0.0612666	-0.945356	0.519301	6639.96	12786.3	4745.55	10921.9	7665.99	7081	5558.41	3726.81	6780.07	8315.49	7930.59	19356.1	15137.4	14541.6	10966.5	13256.6
9.04_365.2331m/z	365.233	9.03827	neg	(-)-16alpha,17-Dihydroxy-atisan-3-one		53641	LMPR0104150005		42608225		Lipids and lipid-like molecules	Prenol lipids	Isoprenoids	*	51.8	63.7	M+FA-H	C20H32O3	-0.897424	1.4274	0.00968732	0.0762247	-1.17996	0.441364	4963.86	11246.6	3382.94	4504	3430.77	7575.74	6457.08	3188.47	6208.03	15751	5950.73	11049.6	19530	5968.56	7999.6	12476.9
1.09_128.0709m/z	128.071	1.09103	pos	alpha-(Methylenecyclopropyl)glycine		66890		C08292	4479247	2517-07-9	Unclassified	Unclassified	Unclassified	*	53	70.2	M+H	C6H9NO2	1.97068	1.41974	0.00269799	0.0541069	-1.21163	0.431779	5239.65	12135	6730.28	7637.77	4352.52	5238.29	4110.42	4266.05	4342.19	15237.3	19128.6	7022.95	12048.9	5647.37	13666.6	12193.3
11.87_931.6509m/z	931.651	11.8706	pos	PC(22:6(4Z,7Z,10Z,12E,16Z,19Z)-OH(14)/22:3(10Z,13Z,16Z))	HMDB0288155						Unclassified	Unclassified	Unclassified	*	36.2	0	M+NH4	C53H88NO9P	-2.86015	1.41642	0.0442994	0.143189	-1.11042	0.463159	5677.98	12259.3	2.41397e-06	2140.89	8447.06	10704.7	7213.87	3997.74	7241.58	10061.5	8109.15	17332.8	22061.6	17187.5	8406.76	2655.48
4.13_456.1052n	457.112	4.13127	pos	Flavin mononucleotide	HMDB0001520	6295		C00061	643976	146-17-8	Nucleosides, nucleotides, and analogues	Flavin nucleotides	Unclassified	***	65.4	98.7	M+H, M+Na	C17H21N4O9P	1.28187	1.41622	0.0261459	0.111653	1.0654	2.09275	15079	7205.36	4164.14	15755.4	11189.9	19031.3	9145.52	26716.8	19549.7	4661.96	6048.21	9846.34	8964.2	12477	4720.68	3719.12
1.11_213.1235m/z	213.124	1.11178	pos	Prolylproline	HMDB0011180	62027			11622593	20488-28-2	Organic acids and derivatives	Carboxylic acids and derivatives	Amino acids, peptides, and analogues	*	45	34.1	M+H	C10H16N2O3	0.798916	1.40735	0.0144461	0.0878974	-1.66626	0.315069	2786.25	8843.29	2417.58	3332.46	1731.89	4125.92	1778.67	1625.99	4491.21	13368.6	2528.51	7503.41	17980.7	3655.18	10348.1	6518.49
10.74_306.1521m/z	306.152	10.7436	pos	7-[(2-Benzyl-3-sulfanylpropanoyl)amino]heptanoic acid	HMDB0244471				129608		Lipids and lipid-like molecules	Fatty Acyls	Fatty acids and conjugates	*	37	0	M+H-H2O	C17H25NO3S	-0.415266	1.38619	0.0429368	0.140785	-0.920182	0.528442	7344.5	13898.4	2508.96	2676.01	6866.91	6866.67	18150.5	2635.66	11706.8	19556.6	9040.37	12772.6	21441.2	13217.9	13169.6	8090.5
12.47_315.2327m/z	315.233	12.4742	neg	15-phenyl-9E-pentadecenoic acid			LMFA01140078		102355721		Lipids and lipid-like molecules	Fatty Acyls	Fatty Acids and Conjugates	*	50.6	57.7	M-H	C21H32O2	-0.804519	1.37605	0.0300634	0.118433	-0.629095	0.646582	14364.9	22216.7	12999.1	11752.4	13005.8	14715.6	17283.4	12566.3	18231.7	38171.5	19886.7	13883.7	24619.2	18740.7	15954.8	24260.1
5.33_225.1366n	248.126	5.33093	pos	Prenalterol	HMDB0256762						Benzenoids	Phenols	4-alkoxyphenols	*	39.1	0	M+Na, M+K, M+H	C12H19NO3	0.286983	1.37307	0.000162972	0.0281344	0.570861	1.48541	15054.4	10134.9	12847.2	14156.6	15740.9	15269.3	13026.8	18537.9	15802.5	9813.63	9593.99	10585.1	8840.06	12741.2	8560.61	10809.6
3.58_622.3203m/z	622.32	3.58292	pos	Lanceotoxin B		67238		C08873	441864	93802-98-3	Unclassified	Unclassified	Unclassified	*	37.1	0	M+NH4	C32H44O11	-3.18319	1.37002	0.000629904	0.0386223	1.81912	3.52866	7237.98	2051.2	6982.42	6426.97	9221.3	7368.2	2678.39	10165.7	7822.89	83.9712	2512.76	2766.25	1106.67	5515.78	712.522	1660.45
13.12_151.0966m/z	151.097	13.1211	pos	TRIETHYLENE GLYCOL	HMDB0259193						Organic oxygen compounds	Organooxygen compounds	Ethers	*	40.6	6.99	M+H	C6H14O4	0.474632	1.36574	0.0251251	0.109487	0.289876	1.22254	37961.3	31051.3	34159.5	35627.8	39528.8	39628.9	30955.4	44630.3	41198.5	28291	30838.4	36557.5	26238.1	40544.6	27141.4	27748.1
0.62_427.2284m/z	427.228	0.6239	neg	Fluocortin butyl	HMDB0252350				21872759		Lipids and lipid-like molecules	Steroids and steroid derivatives	Pregnane steroids	*	37.3	1.1	M-H2O-H	C26H35FO5	-1.41052	1.36498	0.0249516	0.109378	-1.64002	0.320851	2698.47	8410.34	1715.48	2907.55	2031.12	3733.82	4152.84	1100.55	3247.92	8829.29	2569.61	6160.81	20423.4	7455.64	9072.8	4360.86
1.87_493.2750m/z	493.275	1.86993	pos	DG(2:0/0:0/PGF2alpha)	HMDB0296917						Unclassified	Unclassified	Unclassified	*	37.4	0	M+Na	C25H42O8	-4.59228	1.3638	0.00570795	0.0637471	0.92438	1.89787	13092.4	6898.49	13580.9	11131.6	18523.5	7400.66	10521.9	13382.6	17105.9	3361.64	10089.8	10468.8	5832.68	6139.13	9035.1	3362.28
11.61_226.1591m/z	226.159	11.6132	pos	BRN 2646116		68710	LMFA08020168	C10944	5281870		Lipids and lipid-like molecules	Fatty Acyls	Fatty amides	*	40.5	5.6	M+H-H2O	C16H21NO	0.481783	1.35162	2.7163e-05	0.0150955	-2.52113	0.174206	958.691	5503.2	768.084	821.571	1166.06	1324.13	822.061	867.41	941.521	4063.17	6979.55	8293.29	6461.09	5320.57	4183.95	3220.76
0.79_418.2297m/z	418.23	0.787683	pos	Cilazapril	HMDB0015433	1748		C11693	56330	92077-78-6	Organic acids and derivatives	Carboxylic acids and derivatives	Amino acids, peptides, and analogues	*	39.1	15.5	M+H	C22H31N3O5	-9.39087	1.3513	0.0254046	0.109923	0.881526	1.84232	15838.9	8597.25	12219.6	16465.5	25936.7	8125.77	11901.8	20773.6	15449.4	2650.32	9065.24	16565.5	7468.51	11585.6	7952.88	4892.59
0.84_289.0177m/z	289.018	0.838583	neg	Sulisobenzone	HMDB0258614	43340			19988		Benzenoids	Benzene and substituted derivatives	Benzophenones	*	37.7	1.06	M-H2O-H	C14H12O6S	0.123404	1.35045	0.00827367	0.0724921	-0.844312	0.556976	7745.2	13905.8	5176.03	9024.23	10467.5	11292.5	5947.62	6536.8	5771.76	11614.1	11929.9	18448.9	10497.3	22180.7	11503.1	11166.6
12.04_447.2750m/z	447.275	12.0417	neg	(+)-Scalarin		53745	LMPR0105060001		42608279		Lipids and lipid-like molecules	Prenol lipids	Isoprenoids	*	39.4	0	M+FA-H	C25H38O4	-0.411116	1.34444	0.0320711	0.122087	-0.960736	0.513795	6722.78	13084.6	4254.26	4890.42	6544.76	11835.5	9978.62	4786.91	4769	22849.8	9387.48	6770.48	20856.5	8589.67	12395.1	10742.9
3.69_684.1906m/z	684.191	3.68817	neg	Malvidin 3-rhamnoside 5-glucoside	HMDB0303640						Phenylpropanoids and polyketides	Flavonoids	Flavonoid glycosides	*	36.3	0	M+FA-H	C29H35O16+	-0.126849	1.34312	0.00149995	0.0477248	2.1032	4.29661	7138.48	1661.42	13037.7	5825.82	8273.76	8387.65	6998.13	2525.09	4921.18	2304.12	2040.87	182.189	2026.29	866.806	396.67	3813.01
1.42_270.1450m/z	270.145	1.41913	pos	Tyrosyl-Alanine	HMDB0029098	85991			4078684		Organic acids and derivatives	Carboxylic acids and derivatives	Amino acids, peptides, and analogues	**	45.5	0	M+NH4	C12H16N2O4	0.671038	1.33839	0.00108659	0.0436899	-2.42635	0.186035	1104.07	5934.75	406.458	1525.35	413.62	1083.3	2855.33	413.216	1031.21	9744.44	2640.87	5407.7	9823.02	3175.9	5222.01	5529.29
12.36_404.2928n	405.3	12.3611	pos	MG(22:5(7Z,10Z,13Z,16Z,19Z)/0:0/0:0)	HMDB0011586	62368			53480994		Lipids and lipid-like molecules	Glycerolipids	Monoradylglycerols	*	46.4	39.6	M+H, M+Na	C25H40O4	0.317386	1.33488	0.0448734	0.144096	-1.3565	0.390527	4671.56	11962.2	3027.06	2230.65	3916.73	11438.4	5745.52	1612.65	4729.93	26961.1	8062.67	4105.14	16634.8	4731.24	10297.4	12942.9
1.11_122.0247m/z	122.025	1.1114	neg	Nicotinic acid	HMDB0001488	6272		C00253	938	59-67-6	Organoheterocyclic compounds	Pyridines and derivatives	Pyridinecarboxylic acids and derivatives	**	53.8	0	M-H	C6H5NO2	-0.623442	1.32558	0.0130581	0.0852866	0.816363	1.76096	14218.4	8074.21	9689.4	17281.4	19032.2	10779.6	13778.1	18686.5	10281.4	4547.39	8519.37	9856.65	5644.4	15651.2	6279.39	6021.06
10.44_202.1359n	203.143	10.4438	pos	2-Pentyl-3-phenyl-2-propenal	HMDB0031313	69414		C12288	1712058	122-40-7	Phenylpropanoids and polyketides	Cinnamaldehydes	Unclassified	*	50.3	55.7	M+H-H2O, M+H	C14H18O	0.507379	1.32507	0.0114137	0.0809307	0.650655	1.56988	16266.6	10361.7	16578.1	15715.8	17060.8	15199.3	10706.4	20700	17906	7702.69	9299.53	12880.5	7401.3	19004.8	7393.59	8849.47
0.69_190.0955n	229.059	0.69025	pos	Diaminopimelic acid	HMDB0001370	352	LMFA01170102	C00666	439283	583-93-7	Organic acids and derivatives	Carboxylic acids and derivatives	Amino acids, peptides, and analogues	**	42.3	17.2	M+H, M+K	C7H14N2O4	0.791509	1.31879	0.000389856	0.0344227	1.20414	2.30401	8872.77	3851.02	9264.93	7149.99	7655.35	11024.7	4860.14	10402.6	11751.7	2365.9	3147.22	5268.12	3758.27	4886.12	4996	2535.49
7.59_335.2217m/z	335.222	7.58632	pos	Prostaglandin E2	HMDB0001220	6089	LMFA03010003	C00584	5280360	363-24-6	Lipids and lipid-like molecules	Fatty Acyls	Eicosanoids	***	64.7	74.9	M+H-H2O	C20H32O5	0.134617	1.31128	0.0110958	0.0800216	-0.878933	0.54377	6717.98	12354.5	4795.49	6507.02	4378.19	7776.72	10459.2	3135.25	9973.96	19017.3	9614.91	12499.4	16225.7	9265.33	7437.57	12421
11.56_276.1603m/z	276.16	11.5642	neg	alpha-Pyrrolidinovalerophenone	HMDB0244638	85222			11148955	5485-65-4	Organic oxygen compounds	Organooxygen compounds	Carbonyl compounds	*	39.8	2.21	M+FA-H	C15H21NO	-1.13612	1.30807	0.00475791	0.061561	0.64382	1.56246	14784.4	9462.27	13530.1	14465.4	16915.9	15643.7	11010.7	19344.7	12580.6	6084.28	9985.12	10470.6	7165.17	15242.9	8471.41	8816.44
3.71_204.0899n	203.083	3.7123	neg	L-Tryptophan	HMDB0000929	5879		C00078	6305	73-22-3	Organoheterocyclic compounds	Indoles and derivatives	Indolyl carboxylic acids and derivatives	***	63.3	97.1	M-H, 2M-H	C11H12N2O2	0.0392171	1.30664	0.00388632	0.0579657	-0.778766	0.582865	7624.7	13081.4	5883.66	6422.8	10717.6	8416.71	7285.48	9835.42	4811.21	12199.6	14583	10302	15380.9	7585.43	18018.3	13500.5
11.35_298.2742m/z	298.274	11.3511	pos	17-Octadecynoic acid	HMDB0244776	35229	LMFA01030575		1449	34450-18-5	Lipids and lipid-like molecules	Fatty Acyls	Fatty acids and conjugates	*	53.6	73.1	M+NH4	C18H32O2	0.569132	1.30632	0.00823556	0.0724921	0.332413	1.25912	27720.1	22015.5	26402.5	26641.7	31096.7	29801.6	22601.2	30721	26776.2	17083.3	22118.4	27067.7	18635.7	26483.1	21608	21112.5
1.23_410.0304n	409.023	1.23138	neg	6-Hydroxykaempferol 7,4'-dimethyl ether 3-sulfate		51297	LMPK12112885		44259775		Lipids and lipid-like molecules	Polyketides	Flavonoids	*	39.3	3.22	M-H, M+FA-H	C17H14O10S	-0.822479	1.30415	0.0109234	0.0797321	1.24553	2.37106	10641.7	4488.18	10715	13422.7	14585.2	10324.7	6983.74	14006	4454.86	847.455	3100.46	10239.6	996.832	9261.06	4948.92	2022.88
10.74_524.2996m/z	524.3	10.7436	pos	PG(18:3(6Z,9Z,12Z)/0:0)		80008	LMGP04050020		52927443		Lipids and lipid-like molecules	Glycerophospholipids	Glycerophosphoglycerols	**	36.7	0	M+NH4	C24H43O9P	2.62618	1.30304	0.0484346	0.149805	-0.905435	0.533872	6838.91	12810	3038.56	4518.96	5528.45	3973.79	15651.7	6483.91	8677	19894.8	9565.02	10082.5	21975.8	11764.2	9528.05	6859.86
0.81_247.0426m/z	247.043	0.8082	pos	Nifuradene		72990		C19272	9568055	555-84-0	Unclassified	Unclassified	Unclassified	*	37.6	0	M+Na	C8H8N4O4	-5.05563	1.29897	0.0238365	0.107255	1.04053	2.05699	12709.5	6178.71	10465.6	7467.14	15138.4	16988.2	7746.19	19471.9	11689.3	3211.98	4876.01	8305.24	3461.51	16294.9	4327.42	2773.96
0.84_306.0756n	611.144	0.838583	neg	Mesquitol-4beta-ol		47407	LMPK12020191		44257148		Lipids and lipid-like molecules	Polyketides	Flavonoids	*	37.1	0	M+FA-H, 2M-H	C15H14O7	5.26834	1.29892	0.0211051	0.101802	1.69959	3.24808	8770.61	2700.25	18437.4	3674.37	11675.6	6202.12	5227.57	12899.3	3277.98	2.41397e-06	6079.91	2096.36	1198.5	3936.6	1576.32	4014.03
6.41_179.1077m/z	179.108	6.41138	neg	4-(4-Methylcyclohexyl)-4-oxobutanoic acid	HMDB0253742				6919096		Organic acids and derivatives	Keto acids and derivatives	Gamma-keto acids and derivatives	*	45.4	29.3	M-H2O-H	C11H18O3	-0.297965	1.29793	0.0323657	0.122441	-0.520613	0.697076	12235	17551.9	11608	12862.8	8993.67	14379.7	14829.5	8262.33	14709	18994.1	10080.3	20720.6	25982	13589.8	17830.6	15665.6
8.50_302.2692m/z	302.269	8.49537	pos	Tanikolide		65441	LMFA07040124		5276592		Lipids and lipid-like molecules	Fatty Acyls	Fatty esters	*	48.5	46.6	M+NH4	C17H32O3	0.649433	1.29789	0.000305317	0.0332041	0.409831	1.32853	18905.5	14230.4	17718.2	17978.6	19762.8	20725.4	16680.5	18952.4	20520.2	13607.7	13368.5	16764.6	11503.6	16878.5	14103.5	13386.2
11.35_190.0500m/z	190.05	11.3511	pos	5-Hydroxy-6-methoxy-1h-indole-2-carboxylic acid	HMDB0246803	460309			160640		Organoheterocyclic compounds	Indoles and derivatives	Indolecarboxylic acids and derivatives	*	40.1	4.04	M+H-H2O	C10H9NO4	0.517979	1.29725	0.0152987	0.0897538	0.468937	1.38409	20821.4	15043.4	18518.4	18218.8	23730.6	19625.7	15332	23578	26746	10823.7	14013.7	18432.6	12281.8	21431.7	13678.8	14641.3
13.26_328.3211m/z	328.321	13.2562	pos	Stearoylethanolamide	HMDB0013078	3720	LMFA08040051		27902	111-57-9	Organic nitrogen compounds	Organonitrogen compounds	Amines	***	61.7	83.4	M+H	C20H41NO2	0.170461	1.29645	0.0237935	0.107228	-1.56191	0.338701	3046.62	8995	1429.15	3091.44	3061.62	4087.24	5359.97	2267.83	2029.09	17916.3	7961.89	4318.14	16732.9	3756.84	4523.33	7755.67
6.37_182.1308n	200.165	6.3684	pos	8-undecynoic acid		74272	LMFA01030616		5312735		Lipids and lipid-like molecules	Fatty Acyls	Fatty Acids and Conjugates	*	41.1	10	M+H, M+NH4, M+H-H2O	C11H18O2	0.930633	1.29573	0.00426919	0.0598742	0.314101	1.24324	26813.5	21567.5	24799.3	26069.7	26826.9	26996.3	24486.7	29777.8	28737.9	19196.2	20654.1	25047.1	19190.9	27460.1	18095.3	21328.8
11.14_642.3775m/z	642.378	11.1386	neg	OHOHA-PC			LMGP20010033		134812311		Lipids and lipid-like molecules	Glycerophospholipids	Oxidized glycerophospholipids	*	51.8	63.1	M-H2O-H	C33H60NO10P	-0.142122	1.29299	0.0190446	0.0983116	-0.813009	0.569194	8415.45	14784.9	5941.11	4687.94	3454.53	19584	5862.7	8301.89	11076	16599.9	12878.7	10653.1	16245.2	11986.2	17412	17719
2.58_231.9896m/z	231.99	2.58245	neg	3,4-Dihydro-9-hydroxy-[1]benzothieno[2,3-f]-1,4-thiazepin-5(2H)-one	HMDB0253770	818666			45258277		Organoheterocyclic compounds	Benzothiophenes	1-benzothiophenes	*	39.7	12.5	M-H2O-H	C11H9NO2S2	-0.140306	1.29001	0.00172949	0.0490293	-1.45537	0.364661	2858.9	7839.9	2590.71	2165.91	2167.94	4200.16	2576.73	2783.25	3527.63	13871.4	5256.79	7802.19	8652.14	3820.03	6860.68	8616.1
0.65_377.0665m/z	377.067	0.646067	neg	Tricyclazole	HMDB0031809	72298		C18492	39040	41814-78-2	Organoheterocyclic compounds	Benzotriazoles	Triazolobenzothiazoles	*	37.6	0	2M-H	C9H7N3S	4.34794	1.2893	0.00112	0.0436899	1.08019	2.11432	9340.77	4417.86	12303.8	10064.3	10781.4	7933.13	5928.68	12816.3	5557.76	3989.95	4104.7	4030.55	4518.56	6406.24	3993.37	3881.66
11.71_338.2459n	361.235	11.7109	pos	Sterebin E	HMDB0035379	90675				114343-74-7	Lipids and lipid-like molecules	Prenol lipids	Diterpenoids	*	47.5	44.4	M+H, M+Na, M+H-H2O	C20H34O4	0.707419	1.28866	0.0219797	0.103401	-1.02505	0.491394	7408.23	15075.9	10496.2	10535.4	6333.62	4887.81	8424.11	6216.67	4963.77	25128.8	23109.4	8033.92	10403.6	7538.97	11965.4	19351.5
7.68_487.1924m/z	487.192	7.67528	neg	PG(6:0/6:0)		40861	LMGP04010030		9547124		Lipids and lipid-like molecules	Glycerophospholipids	Glycerophosphoglycerols	*	37.9	0	M+FA-H	C18H35O10P	-5.877	1.2828	0.0199863	0.100023	-1.04335	0.4852	4936.21	10173.6	3431.16	4856.76	3721.58	6360.42	6590.14	2779.33	6814.1	14811.2	5254.29	10252.8	18605.9	6530.46	6667.81	9092.67
0.56_401.1764m/z	401.176	0.558183	neg	Isoflupredone acetate		43219		C14636	224246		Unclassified	Unclassified	Unclassified	*	37.2	0	M-H2O-H	C23H29FO6	-1.38555	1.28167	0.0129147	0.0849098	0.502844	1.417	21550.4	15208.4	16756.8	26870.5	24212.8	19331.2	20104.3	28848.6	14728.6	13351.2	14419.8	17306.7	19090.5	15949.7	13862.7	12478.3
13.10_427.3062m/z	427.306	13.0967	neg	methyl 13-butylperoxy-9,11-octadecadienoate		74462	LMFA01040037		5282872		Lipids and lipid-like molecules	Fatty Acyls	Fatty Acids and Conjugates	*	39.1	0	M+FA-H	C23H42O4	-0.833976	1.28159	0.0136525	0.0865618	-1.3457	0.393463	3857.58	9804.16	3373.01	2373.23	3271.54	4840.56	8180.3	2560.11	2404.27	18666	10417.5	4807.04	11768.7	3512.54	8206.9	11250.4
0.77_258.0562m/z	258.056	0.773817	neg	Arasc	HMDB0248564				5253499		Nucleosides, nucleotides, and analogues	Pyrimidine nucleosides	Unclassified	*	39	5.63	M-H	C9H13N3O4S	2.95501	1.27497	0.0147795	0.0884034	-1.13225	0.456205	5652.39	12390	5325.69	2035.85	3902.36	4701.89	4650.07	12464.1	6486.8	11258.6	15749.7	6126.4	12912.2	4837.43	17711.7	18134.2
1.27_344.1107m/z	344.111	1.266	pos	3-Hydroxyhexanedioylcarnitine	HMDB0241674						Lipids and lipid-like molecules	Fatty Acyls	Fatty acid esters	*	48.5	51.9	M+K	C13H23NO7	0.266956	1.27199	0.000138672	0.0273998	-1.34194	0.394491	3000.04	7604.83	1094.27	3559.65	2433.28	3340.52	4413.92	2162.62	3996.02	10800.2	7655.79	6350.07	7814.06	5337.43	6136.66	9139.63
14.52_210.9917m/z	210.992	14.5243	neg	Thiodiacetic acid sulfoxide		70377		C14873	161772	33388-14-6	Unclassified	Unclassified	Unclassified	*	37.9	0	M+FA-H	C4H6O5S	-0.477314	1.26944	0.00071329	0.0400459	0.747009	1.67831	11433	6812.2	11034.3	14715.2	14462.1	10569.8	10111.9	11237.7	7899.87	5485.93	6275.07	6192.93	6316.49	9291.7	6999.16	7124.14
10.35_385.2353m/z	385.235	10.3458	pos	3,4-Dehydrocilostazol	HMDB0247344						Organoheterocyclic compounds	Quinolines and derivatives	Quinolones and derivatives	*	53.2	72.9	M+NH4	C20H25N5O2	1.80894	1.2684	0.014592	0.0880806	-1.18158	0.44087	3801.34	8622.36	2025.53	4146.15	1808.79	6608.55	5071.52	2253.22	4695.61	12358.6	3452.82	9574.09	15320.1	7291.35	6189.28	6170.3
3.37_420.2168n	421.224	3.37103	pos	DGAT-1 inhibitor 2	HMDB0251103				16202164		Organoheterocyclic compounds	Diazines	Pyrimidines and pyrimidine derivatives	*	40.6	23.3	M+H, M+Na	C24H28N4O3	1.49905	1.26515	0.0281111	0.115355	0.624211	1.54137	16339.4	10600.6	23043.3	18666.5	20392.1	7865.61	11365.1	18266.6	14776.3	6757.32	13982.1	12704.1	7176.17	8912.21	13133.6	11538.5
1.27_446.1518m/z	446.152	1.266	pos	[4,5-Bis(4-methoxyphenyl)-2-thiazolyl]-(4-methyl-1-piperazinyl)methanone	HMDB0252483				196841		Organoheterocyclic compounds	Azoles	Thiazoles	*	38	0.357	M+Na	C23H25N3O3S	2.23631	1.26405	0.00341288	0.0569514	-2.69086	0.154871	927.347	5987.86	2.41397e-06	749.48	147.119	1392.88	3912.22	2.41397e-06	289.729	13101.4	6066.84	3478.02	6702.49	3661.61	3473.41	5431.26
7.47_205.1233m/z	205.123	7.46957	neg	Ibuprofen	HMDB0001925	572		C01588	3672	15687-27-1	Phenylpropanoids and polyketides	Phenylpropanoic acids	Unclassified	*	49.5	50.3	M-H	C13H18O2	-0.660455	1.26128	0.017938	0.0965033	-0.778862	0.582826	6644.79	11401	5755.55	6725.29	4761.95	8801.55	9212.98	4493.84	6762.37	14666.1	5554.78	11874.8	18625.4	9870.67	10000.8	9214.31
1.40_347.1029m/z	347.103	1.40138	neg	Camptothecin sodium	HMDB0259530				265082		Alkaloids and derivatives	Camptothecins	Unclassified	*	43.6	30.2	M-H2O-H	C20H18N2O5	-2.14234	1.25989	0.0205549	0.100941	1.2092	2.3121	10826.2	4682.41	12809.7	13102.4	14563.6	11280.9	6581.39	13849.5	3595.78	813.826	3236.7	8933.75	1177.45	12714.3	4037.58	1863.27
12.81_451.3063m/z	451.306	12.8118	neg	MG(0:0/22:4(7Z,10Z,13Z,16Z)/0:0)	HMDB0011554	62337			53480969		Lipids and lipid-like molecules	Glycerolipids	Monoradylglycerols	*	39	0	M+FA-H	C25H42O4	-0.471711	1.25771	0.0112434	0.0805432	-0.956526	0.515296	5785.45	11227.4	4757.68	5082.19	5842.21	9672.72	5814.85	4805.55	4522.92	16479.1	9624.51	6572.86	16453.9	5513.57	10119.4	13828.5
1.29_675.1620m/z	675.162	1.28923	neg	(5R)-5-[(1S)-1,2-Dihydroxyethyl]-3-[(2R,3R,4S,5S,6R)-3,4,5-trihydroxy-6-(hydroxymethyl)oxan-2-yl]oxyoxolane-2,4-dione	HMDB0260164				74959682		Lipids and lipid-like molecules	Fatty Acyls	Fatty acyl glycosides	*	38.2	0	2M-H	C12H18O11	-0.880669	1.25623	5.06196e-05	0.020422	-3.55569	0.0850415	406.318	4777.88	1630.32	355.868	2.41397e-06	135.303	722.737	2.41397e-06	2.41397e-06	4785.56	2450.66	5013.97	4316.2	5401.66	3368.14	8108.96
0.81_143.0817m/z	143.082	0.8082	pos	Ectoine	HMDB0240650	43384		C06231	126041	96702-03-3	Organic acids and derivatives	Carboxylic acids and derivatives	Amino acids, peptides, and analogues	***	50.7	58.2	M+H	C6H10N2O2	1.17829	1.2551	0.00298215	0.0557886	0.995834	1.99423	10626.9	5328.83	10514.5	10672	11135.7	12121.8	5457.19	11952.3	12535	2345.84	3136.32	8662.62	6126.58	9481.84	5096.48	2452.16
4.50_639.2970m/z	639.297	4.4972	neg	Feprazone	HMDB0252231						Benzenoids	Benzene and substituted derivatives	Unclassified	*	38.5	0	2M-H	C20H20N2O2	-0.992371	1.25144	0.0453367	0.144832	0.885436	1.84732	15352.7	8310.76	10442.1	19068.2	20012.2	8243.84	9517.8	15205.7	24978.7	489.297	4997.91	16752.9	9363.55	12088.8	10369.9	4112.94
0.65_309.0792m/z	309.079	0.646067	neg	8-Hydroxy-4',5,7-trimethoxyflavone	HMDB0040719	95193			5318368	21919-71-1	Phenylpropanoids and polyketides	Flavonoids	O-methylated flavonoids	*	36	0	M-H2O-H	C18H16O6	7.18699	1.25046	0.0026974	0.0541069	0.84157	1.792	11150.2	6222.21	15751.8	11000.1	12605.5	9094.84	7928.82	14619.1	7051.29	5675.81	6457.26	6025.69	6598.13	8031.27	5388.08	5379.25
5.03_171.0662m/z	171.066	5.02708	neg	2-Octenedioic acid	HMDB0000341	5330			6079438	5698-50-0	Lipids and lipid-like molecules	Fatty Acyls	Fatty acids and conjugates	*	50.6	56	M-H	C8H12O4	-0.24414	1.24794	0.0131034	0.0853871	0.459642	1.3752	19746.5	14359	18267.8	22523.7	22806	17413.5	15536.9	23038.1	18639.7	8734.3	13974.8	16306.7	11230	19926.6	17607.8	12732.9
4.16_252.1576n	253.165	4.15805	pos	Hexazinone	HMDB0253153	68694		C10926	39965	51235-04-2	Organic nitrogen compounds	Organonitrogen compounds	Amines	*	41.3	15.1	M+H, M+NH4, M+K	C12H20N4O2	-4.09472	1.24498	0.0316908	0.121575	0.70114	1.62579	16838.8	10357.3	10974.2	22905	24987.2	16203.8	17648.8	13117.2	12035.5	4466.35	7708.47	15408	10725	16595.7	6357.75	11240
7.50_437.1650m/z	437.165	7.49575	pos	A-D-Glucopyranoside,6-O-acetyl-1,3,4-tris-O-(2-methyl-1-oxopropyl)-B-D-fructofuranosyl, 6-acetate2,3,4-tris(2-methylpropanoate)	HMDB0258030				22593306		Organic oxygen compounds	Organooxygen compounds	Carbohydrates and carbohydrate conjugates	*	38.9	0	M+H-H2O	C18H30O13	-0.696388	1.24328	0.00193829	0.0498466	-30.7287	5.62021e-10	2.41397e-06	4295.17	2.41397e-06	2.41397e-06	2.41397e-06	2.41397e-06	2.41397e-06	2.41397e-06	2.41397e-06	1007.09	2145.7	7385.97	4455.9	7988.1	5772.51	1310.9
0.59_208.1552m/z	208.155	0.58995	pos	Prometon	HMDB0256804	44586		C14186	4928	1610-18-0	Organoheterocyclic compounds	Triazines	1,3,5-triazines	*	37.1	0.417	M+H-H2O	C10H19N5O	-2.15805	1.23923	0.0378453	0.132162	1.09698	2.13907	12370.6	5783.17	9503.14	15025.5	14293.7	14621.6	4696.45	16932.4	11521.5	176.463	1981.6	12425.3	2818.35	16255.1	5717.29	1108.15
0.83_280.1393m/z	280.139	0.82825	pos	Fructosyl valine	HMDB0252496				101683884		Organic acids and derivatives	Carboxylic acids and derivatives	Amino acids, peptides, and analogues	*	45.3	31.9	M+H	C11H21NO7	0.924516	1.23681	0.00308438	0.056348	-1.26811	0.415202	3314.81	7983.6	2792.05	2645.89	2661.49	3964.04	3761.4	2672.95	4705.84	11502.2	6780.84	4136.65	12890.4	5116.72	6723.77	8734.57
0.71_110.0274m/z	110.027	0.708033	pos	Hypotaurine	HMDB0000965	281		C00519	107812	300-84-5	Organic acids and derivatives	Sulfinic acids and derivatives	Sulfinic acids	***	50.3	51.2	M+H	C2H7NO2S	3.59416	1.23671	0.00818449	0.0724921	0.970076	1.95894	10193.7	5203.65	7493.7	7696.12	8193.48	16426.3	7328.55	11876.2	12341.3	4538.15	5915.9	4296.82	3137.12	10134.3	3897.46	4505.82
0.73_162.0527n	161.045	0.730267	neg	3-Hydroxy-2-methylglutaric acid	HMDB0029169	86060				1189155-79-0	Lipids and lipid-like molecules	Fatty Acyls	Fatty acids and conjugates	***	47.9	41.1	M-H2O-H, M-H	C6H10O5	-0.858334	1.23235	0.0492447	0.150663	0.519988	1.43394	22484.2	15680	31857.7	23788.8	19237.7	21004.2	31517.3	16291.2	13692.1	22263.8	15441.6	10691.4	16822	13352.7	11603	19585.1
3.68_605.3752m/z	605.375	3.67817	pos	2-Keto-2'-hydroxy-beta-carotene			LMPR01070779		14523231		Lipids and lipid-like molecules	Prenol lipids	Isoprenoids	*	36.2	0	M+K	C40H54O2	-0.682463	1.22986	0.00656186	0.0667788	1.47579	2.78137	7913.38	2845.14	4909.9	7549.01	11123.5	6188.69	4205.66	11470	9946.89	2.41397e-06	1949.72	6706.61	1400.46	6863.04	2380.19	615.96
1.09_414.2467m/z	414.247	1.09103	pos	Isopetasoside	HMDB0029622	86382			131750888	69809-29-6	Lipids and lipid-like molecules	Prenol lipids	Terpene glycosides	*	36.9	0	M+NH4	C21H32O7	-4.86243	1.22207	1.67472e-05	0.013905	-2.05289	0.241001	1133.39	4702.86	1461.04	1950.7	1231.33	24.3832	1768.59	619.799	877.905	4417.06	3672.28	5132.1	6863.45	3464.04	5390.46	3980.61
0.59_102.0343m/z	102.034	0.58995	pos	1,2-Benzisoxazole	HMDB0244058				71073		Organoheterocyclic compounds	Benzisoxazoles	Unclassified	*	37.8	1.55	M+H-H2O	C7H5NO	4.19538	1.22023	0.0200327	0.100035	0.294306	1.22629	27427.7	22366.3	25436.6	31136.6	27516.8	27229.2	21132.2	32073.7	27468.6	25923	20952.9	25065.8	17483.3	26151.4	19136.8	21851
5.85_197.1417n	220.131	5.8544	pos	Estreptoquinasa	HMDB0258508						Organic acids and derivatives	Carboxylic acids and derivatives	Amino acids, peptides, and analogues	*	41.8	12.5	M+Na, M+K, M+H	C11H19NO2	0.527271	1.21967	0.0250388	0.109378	0.274149	1.20928	30069.2	24865.3	28005.9	26055.5	30064.5	31983.1	28490.5	31724.2	34160.6	20071.5	26891.4	26979.4	19778.7	32858.6	22361	25116.8
10.32_249.1851m/z	249.185	10.3194	pos	(9R,13R)-1a,1b-dinor-10,11-dihydro-12-oxo-15-phytoenoic acid		36060	LMFA02010008		5716901		Lipids and lipid-like molecules	Fatty Acyls	Octadecanoids	*	53.7	74.5	M+H-H2O	C16H26O3	0.567881	1.21573	0.0178883	0.0963996	0.468427	1.3836	18345.8	13259.4	18209.7	17009.6	19799.7	20221.3	11247.3	24144.2	17788.6	12124.9	15147.3	16353.2	10378.6	17205.4	9690.19	11916.6
9.86_398.1151n	397.108	9.86262	neg	Methyl acrylate-divinylbenzene, completely hydrolyzed, copolymer	HMDB0032389	88413			1151711	128903-15-1	Organoheterocyclic compounds	Pyridines and derivatives	Pyridyltriazoles	*	37.8	0	M-H, M+FA-H	C18H18N6O3S	-2.44095	1.21295	0.0224437	0.104447	0.443404	1.35981	20926.8	15389.5	21400.4	23702	24162.8	20714.7	15975.5	23329.5	17202.4	10494.9	16599.7	20024	12069.1	22756.6	13401.4	12380.8
7.12_521.1742m/z	521.174	7.11703	neg	1-(3-Methylbenzoyl)-1H-indazole-3-carbonitrile	HMDB0249950				71818549		Benzenoids	Benzene and substituted derivatives	Benzoyl derivatives	*	39.4	0	2M-H	C16H11N3O	1.94768	1.21225	0.0346444	0.1262	0.434573	1.35151	21403.6	15836.8	22688.1	21171.5	26530.6	19050.6	13138.1	28549.7	18696.3	11499.2	15950.8	17500.7	13802.3	22289.8	14719.4	15095.1
12.49_404.2927n	405.3	12.4921	pos	MG(22:5(4Z,7Z,10Z,13Z,16Z)/0:0/0:0)	HMDB0011585	62367			53480993		Lipids and lipid-like molecules	Glycerolipids	Monoradylglycerols	*	52.2	68.7	M+H-H2O, M+H	C25H40O4	0.123767	1.2083	0.0476795	0.148495	-0.784858	0.580409	7814.26	13463.4	4086.71	4286.8	5448.25	16644.5	11607.2	5203.67	7422.63	22318.3	14267.5	9274.37	17542	10171.2	10917	9753.25
4.51_309.0720m/z	309.072	4.51037	neg	5-(3,4-Dihydroxyphenyl)-5-ethylbarbituric acid		1819			15557863	35607-35-3	Unclassified	Unclassified	Unclassified	*	38.1	0	M+FA-H	C12H12N2O5	-3.04867	1.20519	0.0400314	0.136136	0.496531	1.41082	19836.8	14060.5	19841.5	20427.7	23648.8	20425.4	13941.4	26832.5	13739.9	8809.7	14779.3	18113.7	10210.2	21954	11901.5	12654.9
4.94_182.1904m/z	182.19	4.94295	pos	Dicyclohexylamine	HMDB0251214	70260		C14686	7582	101-83-7	Organic nitrogen compounds	Organonitrogen compounds	Cyclohexylamines	*	41.8	11.8	M+H	C12H23N	0.653136	1.20448	0.0076157	0.070519	0.546695	1.46074	15056	10307.1	13897	12871.2	12016.6	18491.1	12650.6	18137	17328.4	7708.68	11638.7	13064.5	9227.12	13767.5	6362.9	10380.4
9.05_317.2113m/z	317.211	9.04908	pos	Prostaglandin A2	HMDB0002752	3465	LMFA03010035	C05953	5280880	13345-50-1	Lipids and lipid-like molecules	Fatty Acyls	Eicosanoids	***	62.9	81.3	M+H-H2O	C20H30O4	0.537706	1.20378	0.012843	0.0847901	-0.928795	0.525297	5456.48	10387.4	3929.92	4623.51	3531.92	6765.51	9299.97	3140	6904.56	16501.3	6567.4	10339.3	12896.3	7279.26	6416.54	12711.9
0.84_497.0232m/z	497.023	0.838583	neg	Nitrocefin	HMDB0259569				74926725		Organic acids and derivatives	Carboxylic acids and derivatives	Amino acids, peptides, and analogues	*	38.3	4.34	M-H2O-H	C21H16N4O8S2	0.0801038	1.20306	0.0157543	0.090755	1.16441	2.24141	9617.76	4290.93	9761.37	7928.88	13825.9	11427.9	3276.09	9767.68	11336.5	30.7296	3132.1	7614.76	2108.62	10780	4606.5	1763.84
4.19_513.3039m/z	513.304	4.19065	pos	3-O-alpha-L-rhamnopyranosyl-3-hydroxynonanoyl-3-hydroxydecanoic acid			LMFA13030011				Lipids and lipid-like molecules	Fatty Acyls	Fatty acyl glycosides	*	49	51.8	M+Na	C25H46O9	1.05512	1.20303	0.0279658	0.115139	0.746688	1.67794	14058.9	8378.69	12648.9	13374.8	20023.9	10363.8	8789.69	12721.1	20490.1	1328.85	9912.29	12462.9	7722.98	11926.8	10053.2	5243.77
4.62_121.0294m/z	121.029	4.6162	neg	4-Hydroxybenzaldehyde	HMDB0011718	62451		C00633	126	123-08-0	Organic oxygen compounds	Organooxygen compounds	Carbonyl compounds	**	45.9	0	M-H	C7H6O2	-0.745472	1.2023	0.0175937	0.0957141	-1.01579	0.494559	5392.35	10903.3	4903.98	5474.6	5561.62	6841.93	5541.34	5265.85	4157.14	19852.4	5902.11	10858.7	10769.1	5618.91	7755.41	15566.8
4.85_168.9893m/z	168.989	4.85112	neg	1,1,1,2,3,3,3-Heptafluoropropane	HMDB0244037				67940		Organohalogen compounds	Organofluorides	Unclassified	*	39.7	0	M-H	C3HF7	-0.430342	1.2018	0.0186936	0.0978508	0.380304	1.30162	22791.1	17509.9	25520.6	25823.4	26613.4	21292.3	20269.1	23085.5	16933.9	12726.3	17023.3	19417.6	14559.5	24485.4	17050.6	17306.4
12.18_896.5382m/z	896.538	12.1838	pos	PGP(16:0/22:4(7Z,10Z,13Z,16Z))	HMDB0013483				53481803		Lipids and lipid-like molecules	Glycerophospholipids	Glycerophosphoglycerophosphates	*	36.8	0	M+NH4	C44H80O13P2	-3.50283	1.1963	0.0170508	0.0941101	0.88989	1.85303	10572.8	5705.64	9279.54	12119	5950.13	8948.4	9275.25	14677.8	13759.2	2.41397e-06	8576.4	8423.91	3677.05	9796.18	3672.44	5793.54
1.11_379.0370m/z	379.037	1.1114	neg	Salacinol	HMDB0257455				18730125		Organic acids and derivatives	Organic sulfuric acids and derivatives	Sulfuric acid esters	*	44.2	33	M+FA-H	C9H18O9S2	-1.33632	1.19612	0.0133774	0.0859321	1.0697	2.09899	9595.6	4571.53	11561.1	10844.8	14461.4	7710.72	5746.68	10763.4	6081.04	963.611	7103.56	9408.11	1372.17	7151.78	3450.09	2551.4
0.63_322.1851m/z	322.185	0.628083	pos	Phenylalanylarginine	HMDB0028989	85891			10268029	1238-09-1	Organic acids and derivatives	Carboxylic acids and derivatives	Amino acids, peptides, and analogues	*	39.3	13.6	M+H	C15H23N5O3	-6.9982	1.19519	0.0312923	0.120577	1.05114	2.07217	10476.3	5055.72	12535.9	8655.24	12664.1	4699.26	3411.79	18250.1	13117.8	443.992	5278.28	8881.9	3348.12	6605.86	6663.47	4168.4
11.20_837.1871m/z	837.187	11.1964	neg	Cyanidin 7-arabinoside	HMDB0037989	92773			131752265	28985-03-7	Phenylpropanoids and polyketides	Flavonoids	Hydroxyflavonoids	*	38.7	0	2M-H	C20H19O10+	-1.4795	1.19421	0.0248967	0.109334	0.396799	1.31658	23701.5	18002.2	24916.8	27290.5	29039.4	23567.6	20317.2	24382.7	16395.9	12619.4	15544.6	21246.9	16721.2	25182.3	17200.6	17500.8
7.95_207.1389m/z	207.139	7.94618	neg	3-Oxo-alpha-ionol	HMDB0303805	340051			5370052		Lipids and lipid-like molecules	Prenol lipids	Sesquiterpenoids	*	42.7	16.7	M-H	C13H20O2	-0.51961	1.19239	0.00817762	0.0724921	-0.788249	0.579047	5499.1	9496.82	4391.91	6097.88	3771.67	7448.78	7097.71	3796.81	5888.95	9812.17	4769.59	12195.5	13935.1	7947.64	9459.47	8358.31
11.99_259.2058m/z	259.206	11.9914	pos	11E,13E-octadecadien-9-ynoic acid		35165	LMFA01030511		5312641		Lipids and lipid-like molecules	Fatty Acyls	Fatty Acids and Conjugates	*	55.1	79.8	M+H-H2O	C18H28O2	0.496894	1.18043	0.0152416	0.0895956	0.365405	1.28824	20563	15962	18604.1	20229.9	20712.4	20734.5	17832.8	22950.1	22877.1	11926.2	17001	17853.9	12524.7	22984.9	13393.3	16050.3
0.84_275.0214m/z	275.021	0.838583	neg	5-(but-3-en-1-yn-1-yl)-5'-methyl-2,2'-bithiophene		405724	LMFA12000352		3083681		Lipids and lipid-like molecules	Fatty Acyls	Oxygenated hydrocarbons	*	37.5	5.66	M+FA-H	C13H10S2	3.3041	1.17985	0.00460409	0.0612137	-2.1313	0.228252	1273.94	5581.31	1957.6	713.258	1156.61	2973.45	930.629	387.538	798.523	4738.46	2487.02	5077.11	4179.58	11650.9	7750.09	3186.01
7.54_590.2346m/z	590.235	7.5411	neg	Dihydrozeatin-9-N-glucoside-O-glucoside	HMDB0012212	62859				619326-04-4	Lipids and lipid-like molecules	Fatty Acyls	Fatty acyl glycosides	*	37.9	0	M+FA-H	C22H35N5O11	5.63611	1.17717	0.00927392	0.0755847	1.83076	3.55723	6490.33	1824.54	11679	7107.02	3903.67	1964.72	4284.87	11762.1	4730.9	1296.03	1046.06	425.511	2201.16	2077.94	2946.24	2778.86
9.03_366.2407n	389.23	9.02985	pos	5alpha-Tetrahydrocortisol	HMDB0000526	5511	LMST02030200		92748	302-91-0	Lipids and lipid-like molecules	Steroids and steroid derivatives	Hydroxysteroids	*	38.8	0	M+NH4, M+Na	C21H34O5	0.210095	1.17037	0.0190335	0.0983116	-1.36148	0.389183	2930.02	7528.64	1728.05	2185.47	1615.93	3840.14	4036.03	1391.14	5713.36	13641.8	2901.6	8373.32	11852.8	2922.14	5137.85	7870.98
0.83_204.1232m/z	204.123	0.82825	pos	L-Acetylcarnitine	HMDB0000201					3040-38-8	Lipids and lipid-like molecules	Fatty Acyls	Fatty acid esters	***	47.2	34.5	M+H	C9H17NO4	1.04459	1.16957	0.0113154	0.0806945	2.17487	4.51544	6495.24	1438.45	7396.8	3394.43	5099.83	2100.59	12781.8	12204.6	2488.59	1413.35	1403.34	1240.72	1263.3	2019.47	1433.29	1295.69
12.93_726.5076m/z	726.508	12.9278	pos	PA(20:3(8Z,11Z,14Z)/17:2(9Z,12Z))		81763	LMGP10010597		52929190		Lipids and lipid-like molecules	Glycerophospholipids	Glycerophosphates	*	36.1	0	M+NH4	C40H69O8P	1.1314	1.16794	0.0407776	0.137444	0.518662	1.43263	20646.5	14411.7	15698.9	21520.3	20273	21382.4	20532.8	28763.4	16354.9	12167.6	10979.7	25100.8	14513	18112.1	7096.81	12911.4
9.82_398.3268m/z	398.327	9.82408	pos	3-hydroxyhexadecanoyl carnitine	HMDB0061642				71464553		Lipids and lipid-like molecules	Fatty Acyls	Fatty acid esters	***	46.1	36	M+H-H2O	C23H45NO5	0.655286	1.16528	0.0263326	0.111902	1.04357	2.06132	9712.77	4711.92	8264.77	3378.28	13470.4	11124.5	3669.08	14463	13619.4	1007.23	5715.25	7110.99	2415.96	6625.98	5925.53	4182.51
4.70_92.0625n	91.0552	4.70173	neg	Toluene	HMDB0034168	65600		C01455	1140	108-88-3	Benzenoids	Benzene and substituted derivatives	Toluenes	*	39.5	0	M-H, M+FA-H	C7H8	-1.29026	1.16522	0.00201652	0.0499433	-2.45595	0.182258	914.812	5019.33	816.125	508.272	538.603	2039.63	1343.14	635.375	522.546	9890.65	3244.99	4079.13	6263.78	1471.97	4086.01	6098.77
0.58_619.2566m/z	619.257	0.57955	neg	3-(2,4-Dimethyl-5-(2-oxo-1,2-dihydroindol-3-ylidenemethyl)-1H-pyrrol-3-yl)propionic acid	HMDB0258528				206042		Organoheterocyclic compounds	Indoles and derivatives	Indolines	*	39.2	0	2M-H	C18H18N2O3	0.614233	1.16382	4.34318e-05	0.0194174	2.493	5.62949	4451.63	790.77	6052.25	4037.76	4413.9	5904.49	4417.32	1681.09	4654.6	1145.97	669.592	2.41397e-06	1457.77	387.541	440.771	1433.74
1.24_143.1313n	144.138	1.24372	pos	Conhydrine		73470		C19983	10314	495-20-5	Unclassified	Unclassified	Unclassified	*	43.2	21.6	M+H-H2O, M+H	C8H17NO	2.01728	1.16159	1.40335e-07	0.00244689	1.81269	3.51296	4585.34	1305.27	4389.32	4599.93	4787.71	4381.68	3740.73	6117.82	4080.21	1235.61	1047.15	1352.15	1324.32	1794.17	1309.35	1074.11
0.65_574.9943m/z	574.994	0.648267	pos	Perfluorooctane sulfonamidoacetic acid	HMDB0256327						Organohalogen compounds	Alkyl halides	Alkyl fluorides	*	36.2	0	M+NH4	C10H4F17NO4S	2.7573	1.16157	0.000150479	0.0273998	1.39679	2.63316	5750.21	2183.77	5930.7	5255.23	5528.29	6049.22	3462.56	7756.65	6268.83	2647.47	1751.31	1646.26	1464.17	4648.82	1382.73	1745.64
1.11_633.1265m/z	633.126	1.1114	neg	Kolaflavanone		47515	LMPK12040002	C09761	155169		Lipids and lipid-like molecules	Polyketides	Flavonoids	*	40.3	14	M+FA-H	C31H24O12	2.50881	1.16057	0.0129632	0.0850363	1.90962	3.75709	6183.13	1645.72	8825.75	3387.6	9638.44	1783.45	5920.2	11332.1	2394.39	2.41397e-06	3399.52	1501.33	2.41397e-06	3774.56	529.099	2315.56
1.11_190.0122m/z	190.012	1.1114	neg	2-carboxy-L-xylonolactone	HMDB0304063				90658445		Organic oxygen compounds	Organooxygen compounds	Carbohydrates and carbohydrate conjugates	*	47	44.3	M-H	C6H7O7-	1.45874	1.16044	0.00600595	0.0649813	1.07683	2.1094	8152.35	3864.77	4015.81	9369.53	11287.7	6902.11	7238.67	11542.1	6710.55	2016.91	4457.27	4558.89	2234.7	7937.98	2949.69	2897.95
10.82_709.1625m/z	709.162	10.8233	neg	Apigenin 7-(6''-malonylneohesperidoside)		48817					Unclassified	Unclassified	Unclassified	*	36.3	0	M+FA-H	C30H32O17	0.473201	1.1527	0.00694655	0.0680511	0.506814	1.42091	15048.7	10590.9	15114.3	17540.9	18342.6	13568.5	11933.5	18129.6	10711.8	8109.06	10089.5	11663.2	10096.3	14208.6	10199	9770.71
4.34_241.0741m/z	241.074	4.3446	pos	Tetrahydroharmol	HMDB0029835	86539			368982	17952-75-9	Alkaloids and derivatives	Harmala alkaloids	Unclassified	*	39.3	1.34	M+K	C12H14N2O	1.4307	1.15061	0.0248156	0.109162	1.14252	2.20766	9561.14	4330.9	10378.3	11564.1	11572.9	11547.8	3729.03	11917.3	6218.55	607.118	1970.67	7750.14	1749.1	12505	3974.19	1760.04
0.77_283.0781m/z	283.078	0.773817	neg	2-decene-4,6,8-triyn-1-al		75341	LMFA06000063		5283355		Lipids and lipid-like molecules	Fatty Acyls	Fatty aldehydes	*	38.1	0	2M-H	C10H6O	5.91069	1.1497	0.0205246	0.100893	-1.1613	0.447111	4283.04	9579.36	7842.65	1310.89	3069.86	3166.45	2591.32	9170.8	2829.31	10170.3	10083.1	4439.71	13732.2	3030.87	11273.4	14326
8.75_344.2353n	345.243	8.7503	pos	13(14)-EpDPE		36451	LMFA04000036		11674605		Lipids and lipid-like molecules	Fatty Acyls	Docosanoids	*	50.1	57.3	M+H-H2O, M+H	C22H32O3	0.57096	1.14903	0.0183978	0.0971188	-1.32501	0.399147	2749.87	6889.36	965.927	2625.19	1523.93	4807.32	3082.91	1291.62	4952.17	10201.6	1796.42	7385.35	12693.4	3942.27	6267.54	5938.91
4.39_214.0333m/z	214.033	4.38995	neg	Monosodium glutamate	HMDB0303331				8887		Organic acids and derivatives	Carboxylic acids and derivatives	Amino acids, peptides, and analogues	*	39.8	0	M+FA-H	C5H8NNaO4	-0.093355	1.1438	0.0284194	0.116164	-1.91425	0.265309	1837.23	6924.85	1030.05	1540.29	855.442	2183.61	4548.34	1015	1687.85	17880.7	3758.67	3904.7	7778.75	2287.14	5102.63	7761.41
11.34_360.2149n	361.222	11.3373	pos	LY 255283		408244			122023	117690-79-6	Unclassified	Unclassified	Unclassified	*	38.3	0.0102	M+H, M+NH4, M+K	C19H28N4O3	-3.53537	1.14379	0.0286724	0.116589	0.419444	1.33741	19548.8	14616.9	19116.9	18196.9	20508.9	16360.2	14113.5	21891.8	26653.6	9847.47	12910.1	16005.7	13928.8	20793	14906.6	13926.8
0.73_669.1245m/z	669.124	0.730267	neg	Nicotinamide ribotide	HMDB0000229	4167		C00455	14181	75414-16-3	Nucleosides, nucleotides, and analogues	Pyridine nucleotides	Nicotinamide nucleotides	**	39.2	0	2M-H	C11H16N2O8P+	4.29109	1.14365	0.0021706	0.0503949	1.42286	2.68117	6180.38	2305.11	9284.3	7609.15	4751.96	4740.99	6861.29	4347.97	5666.98	4658.95	2413.97	736.043	2676.21	469.053	327.576	4853.95
10.96_271.1693m/z	271.169	10.9575	pos	1,3,5[10]-Estratriene-2,3-17 beta-triol	HMDB0244190	984293			9684		Lipids and lipid-like molecules	Steroids and steroid derivatives	Estrane steroids	*	41.8	16.1	M+H-H2O	C18H24O3	0.194721	1.13317	0.00274799	0.0546964	0.634721	1.55264	10593.3	6822.75	10589.5	11365.3	12341.9	8944.95	7780.66	12937.8	10192.7	5107.52	6678.79	8672.88	4282.31	9883.94	6370.25	6763.56
4.81_173.0818m/z	173.082	4.81215	neg	Suberic acid	HMDB0000893	4243	LMFA01170001	C08278	10457	505-48-6	Lipids and lipid-like molecules	Fatty Acyls	Fatty acids and conjugates	***	74.8	90.1	M-H	C8H14O4	-0.637415	1.13271	0.0144583	0.0878974	0.480993	1.3957	16256.4	11647.5	16782	17221.7	18742.9	16828	12708.8	19290.3	12221.4	8120.24	11638.7	14398.4	9340.92	17508.8	10441	10084.2
4.28_223.1543m/z	223.154	4.2841	pos	Tetraglyme	HMDB0258894						Organic oxygen compounds	Organooxygen compounds	Ethers	*	41.4	10.7	M+H	C10H22O5	1.24385	1.12729	0.000876121	0.0418879	0.822048	1.76791	7983.73	4515.91	5799.56	6685.43	7954.52	8220.61	7888.48	9249.61	10087.9	2969.19	4225.08	5974.45	2196.98	5395.6	4646.61	6203.42
10.97_381.1130m/z	381.113	10.9693	neg	Lophirone J		52539	LMPK12140049		42607816		Lipids and lipid-like molecules	Polyketides	Flavonoids	*	38.7	0	M-H2O-H	C25H20O5	-0.485247	1.12652	0.0100324	0.0771612	0.747207	1.67854	10178	6063.58	10263.6	9514.83	9978.37	7692.71	6188.34	15033.5	12574.3	3744.41	6205.5	7408.21	4326.12	9741.73	5612.87	5406.22
9.62_367.2487m/z	367.249	9.61523	neg	Crassumol A			LMPR01040118				Lipids and lipid-like molecules	Prenol lipids	Isoprenoids	*	53.4	72.2	M+FA-H	C20H34O3	-0.797171	1.12587	0.0128235	0.0847578	-0.927936	0.52561	4567.19	8689.32	2446.63	6065.97	3158.34	6138.7	4262.95	4047.13	5850.63	10627.8	5804	8031.06	14928.9	4980.4	6674.19	9778.95
9.33_299.2008m/z	299.201	9.3252	pos	all-trans-3,4-Didehydroretinoate	HMDB0060092	41514	LMPR01090020		447276		Lipids and lipid-like molecules	Prenol lipids	Retinoids	*	52	64.5	M+H	C20H26O2	0.776503	1.1252	0.0428448	0.140676	-0.788273	0.579037	6008.31	10376.4	5118.35	5548.77	3012.42	8019.23	8733.3	3882.88	7743.24	13326.7	4846.07	10521.3	18474.7	6077.91	8475.95	10912.1
2.56_304.1328m/z	304.133	2.56448	pos	3-Butyl-1-hydroxy-1-(4-methylphenyl)sulfonylurea	HMDB0257604				22389998		Benzenoids	Benzene and substituted derivatives	Benzenesulfonamides	*	38.1	0	M+NH4	C12H18N2O4S	0.750557	1.12386	0.000702598	0.0400459	-1.30381	0.405055	2287.92	5648.41	1070	3146.15	2213.57	2423.94	3574.22	1678.6	1908.98	5928.53	3354.22	5904.4	8752.02	3952.47	5178.84	6468.42
11.04_455.2026m/z	455.203	11.039	neg	Acetyl-arginyl-glycyl-aspartyl-serinamide	HMDB0247924				21155473		Organic acids and derivatives	Carboxylic acids and derivatives	Amino acids, peptides, and analogues	*	38.6	0	M-H2O-H	C17H30N8O8	3.80492	1.12334	0.0323617	0.122441	0.409348	1.32809	17682.4	13314.2	20023.6	17168.8	13300.1	16295.2	17572.2	14748.7	24668.5	10062.8	13867.2	11973.6	11486.7	12765.8	13716.5	19326.9
9.26_271.1459m/z	271.146	9.26048	pos	1-(2,6,6-Trimethyl-2-cyclohexen-1-yl)-1,6-heptadien-3-one	HMDB0029704	86435			5365976	79-78-7	Lipids and lipid-like molecules	Prenol lipids	Sesquiterpenoids	*	39.6	0	M+K	C16H24O	-0.00743514	1.11977	0.00279503	0.0550046	0.394218	1.31423	15529.2	11816.2	14358.2	14923.1	16622.4	15912.6	13138.8	17425.7	16323.9	9543.15	11525.4	13164.7	9991.84	15847.1	10572.4	12069.1
5.64_476.2301n	521.228	5.63787	neg	Nalfurafine	HMDB0255431				73046431		Benzenoids	Phenanthrenes and derivatives	Unclassified	*	36.7	0	M-H, M+FA-H	C28H32N2O5	-2.11155	1.11906	0.000369788	0.0339275	1.75228	3.36891	4713.46	1399.1	4127.54	4855.15	6295.1	3292.06	2397.18	5839.22	6187.95	314.233	2201.69	1665.01	410.889	2989.47	1145.63	1066.81
0.73_383.1186m/z	383.119	0.730267	neg	Quinic acid	HMDB0003072			C00296		77-95-2	Organic oxygen compounds	Organooxygen compounds	Alcohols and polyols	**	41.8	0	2M-H	C7H12O6	-2.39011	1.11902	0.0143922	0.0878767	1.90834	3.75377	6310.87	1681.21	12699.1	6089.57	4003.86	5281.56	10290	1313.34	4498.67	4401.03	2058.15	2.41397e-06	1491.75	2.41397e-06	250.163	3567.4
13.69_284.2948m/z	284.295	13.6896	pos	Octadecanamide	HMDB0034146	34494	LMFA08010003	C13846	31292	124-26-5	Organic acids and derivatives	Carboximidic acids and derivatives	Carboximidic acids	**	44.7	3.05	M+H	C18H37NO	0.00401786	1.11543	0.0429477	0.140785	0.283412	1.21707	35888.4	29487.5	40465.5	31877.2	41725.5	42981.6	35906.3	28718.8	29543.8	32931.5	25844.2	30644.5	34489.8	33579.7	23038.2	25884.8
1.67_286.1763m/z	286.176	1.66672	pos	4-Bis(2-hydroxyethyl)amino-L-phenylalanine	HMDB0247322				52933599		Organic acids and derivatives	Carboxylic acids and derivatives	Amino acids, peptides, and analogues	*	46.3	36.5	M+NH4	C13H20N2O4	0.761614	1.11431	0.030868	0.119763	-0.980188	0.506914	4180.25	8246.47	1626.86	7258.02	4613.29	4972.56	4469.41	2047.08	4274.5	5493.46	4128.64	15437.9	11791.2	6828.84	7685.93	6359.27
4.19_159.1262n	182.115	4.19065	pos	DL-2-Aminooctanoic acid	HMDB0000991	5923	LMFA01100056		69522	644-90-6	Organic acids and derivatives	Carboxylic acids and derivatives	Amino acids, peptides, and analogues	*	40	5.07	M+H, M+Na	C8H17NO2	1.4952	1.11291	0.021745	0.103001	0.251929	1.1908	28377	23830.2	24883	27199.1	28463.2	32557.1	23213.6	32236.2	30086.5	20679	22348	25156.5	23424.4	29398.9	21751.5	24053.2
7.93_353.2332m/z	353.233	7.93143	neg	2-[2-(4-Nonylphenoxy)ethoxy]ethanol	HMDB0255709	332346			24773		Benzenoids	Phenol ethers	Unclassified	*	39	0	M+FA-H	C19H32O3	-0.417847	1.10992	0.0100619	0.0772825	-0.802738	0.57326	5192.59	9058.01	3776.33	6026.66	3400.09	7503.99	5921.14	3385.87	6334.07	13158.7	6102.93	9896.65	12403.7	6194.78	6737.44	8911.79
6.71_251.1027m/z	251.103	6.70725	pos	Ser-Tyr	HMDB0258243	85944			4575735		Organic acids and derivatives	Carboxylic acids and derivatives	Amino acids, peptides, and analogues	*	42.7	17.5	M+H-H2O	C12H16N2O5	0.117087	1.10872	0.00423037	0.0597364	-11.6006	0.000322015	1.14484	3555.24	8.01386	2.41397e-06	2.41397e-06	2.41397e-06	2.41397e-06	2.41397e-06	2.41397e-06	798.637	1531.52	7663.43	3583.62	6414.53	3795.99	1098.95
0.71_158.0692n	159.076	0.708033	pos	N-Nitrosobis(2-oxopropyl)amine	HMDB0255200				43371		Organic nitrogen compounds	Organonitrogen compounds	Organic nitroso compounds	*	38.7	0	M+H, M+NH4	C6H10N2O3	0.434903	1.1012	0.0218556	0.103132	-1.21347	0.43123	4533.82	10513.7	6992.39	5286.97	3814.54	2594.99	4815.84	4153.06	4078.94	13460.2	21128.9	6779.25	4835.85	6828.62	6811.2	13751.9
0.59_221.1513m/z	221.151	0.58995	pos	Lauroleic acid		34894	LMFA01030229		5312381		Lipids and lipid-like molecules	Fatty Acyls	Fatty Acids and Conjugates	*	41.2	28.3	M+Na	C12H22O2	0.725097	1.10055	0.00138427	0.0460639	-0.461163	0.7264	9081.53	12502.1	8931.48	9365.23	8693.21	7533.76	10350.9	9427.72	9268.44	14581.7	10079.2	12253.6	15175.2	10079.1	11965.8	13380.2
9.66_239.1288m/z	239.129	9.65748	neg	Cucujolide IV		97393	LMFA07040036		56936046		Lipids and lipid-like molecules	Fatty Acyls	Fatty esters	*	55.4	79.1	M+FA-H	C12H18O2	-0.488023	1.09878	0.0159694	0.0912627	0.404319	1.32346	17703.9	13377	18338.7	19397	18096.8	17307.1	14795.8	20753.8	15238.3	9908.9	12917.3	15645.3	9553.4	19237.7	14959.6	11416.5
9.13_253.1411m/z	253.141	9.12665	pos	Talaromycin A	HMDB0030143	86753			13778220	83720-10-9	Organic oxygen compounds	Organooxygen compounds	Ethers	*	45.5	31.5	M+Na	C12H22O4	0.371606	1.09627	0.00414134	0.0591228	1.74773	3.35831	5438.12	1619.31	9126.26	7459.44	3894.35	2442.74	6151.41	7171.72	1820.95	1590.54	1082.28	701.713	1304.74	1805.71	1743.06	3107.09
5.64_215.1523n	198.149	5.63947	pos	N-Nonanoylglycine	HMDB0013279				10176752		Organic acids and derivatives	Carboxylic acids and derivatives	Amino acids, peptides, and analogues	*	42.8	16.7	M+H-H2O, M+Na, M+H	C11H21NO3	0.589363	1.09042	0.0260183	0.111431	0.322526	1.25052	20915.1	16725.2	17921.3	20917.4	21369.4	23532.3	17536	24875.3	20254.1	16287.4	18598.8	16186.4	13500.3	23504.1	13939.6	15059.5
2.14_393.0544m/z	393.054	2.13895	neg	3-Hydroxy-2-methylpyridine-4,5-dicarboxylate	HMDB0006955	58602		C04604	440403		Organoheterocyclic compounds	Pyridines and derivatives	Pyridinecarboxylic acids and derivatives	*	37.2	0	2M-H	C8H7NO5	-8.06155	1.09011	0.0116059	0.0813448	1.3355	2.52363	7148.91	2832.79	7255.7	8755.47	9301.7	7649.42	4470.44	10183.5	2426.17	573.609	1455.53	5400.77	894.965	7538.49	2800.1	1166.06
11.06_466.3505n	484.384	11.0579	pos	LysoSM(d18:0)	HMDB0012082	41562	LMSP01060002		44260122		Lipids and lipid-like molecules	Sphingolipids	Phosphosphingolipids	*	37.7	0	M+NH4, M+Na	C23H51N2O5P	-6.56254	1.08899	0.00254184	0.0525114	0.879527	1.83977	7290	3962.45	5406.57	7243.94	7017.23	7794.89	4505.05	8245.92	10816.4	3293.23	6055.4	4221.26	3269	3075.82	3170.07	4652.34
1.38_130.0872m/z	130.087	1.38147	neg	L-Isoleucine	HMDB0000172	5193	LMFA01100047	C00407	6306	73-32-5	Organic acids and derivatives	Carboxylic acids and derivatives	Amino acids, peptides, and analogues	**	45.8	0	M-H	C6H13NO2	-0.984437	1.08683	0.00411103	0.0590444	-0.68643	0.621389	6046.14	9730.04	6265.88	6009.85	7850.47	5813.56	5802.93	8044.51	2535.8	10903.5	9822	7938.39	12541.9	6197.58	10607.7	10099.2
1.23_387.0415m/z	387.041	1.23138	neg	1-O-p-Coumaroyl-(b-D-glucose 6-O-sulfate)	HMDB0041174	95596			131753056		Phenylpropanoids and polyketides	Cinnamic acids and derivatives	Hydroxycinnamic acids and derivatives	*	37.4	0	M-H2O-H	C15H18O11S	5.69666	1.08663	0.0113146	0.0806945	1.28722	2.44058	7304.49	2992.93	7385.78	9127.21	9601.58	6903.97	4945.47	10166.6	3000.84	431.53	1977.46	7432.29	543.273	6122.81	3249.71	1193.44
9.22_271.1574n	294.146	9.22312	pos	Cocculine	HMDB0259657				15834862		Alkaloids and derivatives	Erythrina alkaloids	Erythrinanes	*	39.2	0	M+H, M+Na	C17H21NO2	0.454996	1.08637	0.00314022	0.056412	-3.18976	0.109594	415.608	3792.27	375.193	382.857	291.823	542.669	321.762	545.388	449.565	1043.76	2190.13	7172.25	4051.17	6756.19	3747.45	1584.94
0.59_737.3184m/z	737.318	0.58995	pos	Corchorusoside A	HMDB0032823	88745			78200850	210637-15-3	Lipids and lipid-like molecules	Steroids and steroid derivatives	Steroid lactones	*	36.6	0	M+K	C35H54O14	5.63299	1.08467	0.0234519	0.106431	1.89478	3.71866	6326.44	1701.27	5963.59	5517.18	5602.72	13428	4361	2.41397e-06	9412.65	4877.94	2.41397e-06	2.41397e-06	3366.72	2.41397e-06	2.41397e-06	3664.24
10.83_556.3040m/z	556.304	10.8273	pos	TMC-1C			LMFA08020205		10030158		Lipids and lipid-like molecules	Fatty Acyls	Fatty amides	*	39.1	8.97	M+NH4	C30H38N2O7	4.1815	1.08231	0.0195335	0.0994697	0.995194	1.99335	8560.23	4294.4	12733.8	8206.17	8224.69	5081.09	10411.3	11753.1	3511.47	4048.72	2260.45	2922.02	3612.92	2011.25	6417.97	8787.44
0.86_164.9569m/z	164.957	0.861383	neg	Sodium phosphate (Na(H2PO4))	HMDB0303430				24204		Mixed metal/non-metal compounds	Alkali metal oxoanionic compounds	Alkali metal phosphates	*	39.6	0	M+FA-H	H2NaO4P	-0.982985	1.08219	0.0484692	0.149868	0.412681	1.33116	19197.8	14421.9	21031.8	21286.5	24043.3	17907.8	15553.3	22790.3	11771.9	10005.4	14392.2	17072.2	10475.3	20878.5	13631.9	14498
1.65_238.0954n	239.103	1.64745	pos	Glycyltyrosine	HMDB0028853	85762			92829	658-79-7	Organic acids and derivatives	Carboxylic acids and derivatives	Amino acids, peptides, and analogues	*	50.6	56.9	M+H, M+Na	C11H14N2O4	0.339482	1.08214	0.00129204	0.0450427	-1.1031	0.465516	2930.28	6294.7	3669.06	3682.04	2987.42	1540.71	3127.28	2521.7	2983.75	5303.67	5748.14	5610.39	7763.81	3492.88	9799.56	6344.43
0.69_369.2498m/z	369.25	0.69025	pos	Sphingosine 1-phosphate (d16:1-P)	HMDB0060061	83702	LMSP01050005		52931110		Organic acids and derivatives	Organic phosphoric acids and derivatives	Phosphate esters	*	39.1	8.15	M+NH4	C16H34NO5P	-4.25872	1.08134	0.0204033	0.100637	-2.33142	0.198688	1049.02	5279.73	1143.55	739.179	331.435	1282.86	3150.1	358.797	337.211	13252.3	2213.31	2430.89	7425.09	2134.95	3479.72	6021.85
0.65_327.0516m/z	327.052	0.648267	pos	Lamivudine-monophosphate	HMDB0060641				75607387		Nucleosides, nucleotides, and analogues	Nucleoside and nucleotide analogues	Unclassified	*	37.7	0	M+NH4	C8H12N3O6PS	-2.145	1.07979	0.000148225	0.0273998	1.61024	3.05302	4721.05	1546.35	5371.78	3105.43	4473.39	6194.41	2547.37	6359.03	4995.92	1093.69	1424.62	792.636	1865.69	1771.56	2303.6	1572.7
3.71_294.0592n	339.057	3.7123	neg	3,4-Bis(carboxymethyl)-3,4-dihydroxyhexanedioic acid	HMDB0258023				11580187		Organic acids and derivatives	Carboxylic acids and derivatives	Tetracarboxylic acids and derivatives	*	38.8	0	M-H, M+FA-H	C10H14O10	1.6189	1.07823	0.0456038	0.145249	-0.398115	0.758849	15981.4	21060.1	12004.1	12483.7	23399.5	17579.7	14280.3	21347.2	10775.2	17902.7	23751.2	19531.4	21751.9	16355.2	26631.8	21496.2
13.04_477.3219m/z	477.322	13.0445	neg	Rockogenin		84174	LMST01080017		167555		Lipids and lipid-like molecules	Steroids and steroid derivatives	Sterols	*	39.1	0	M+FA-H	C27H44O4	-0.658117	1.07659	0.00980569	0.0766004	-1.21678	0.430243	2971.98	6907.68	1855.81	1869.18	2884.92	4516.96	3680.23	3530.92	2465.84	11862.2	5854.65	3562.82	10233.4	3317.67	5646.9	7876.04
1.29_569.0721m/z	569.072	1.28923	neg	Riccionidin A			LMPK12010445	C08728			Lipids and lipid-like molecules	Polyketides	Flavonoids	*	39.1	0	2M-H	C15H9O6+	-0.739516	1.0753	0.0145432	0.0880162	-0.951749	0.517005	4401.16	8512.8	8508.23	4172.43	4633.21	4331.83	1440.46	3750.59	3971.39	3111.57	8677.36	12910.6	6985.12	11268.8	9398.95	7237.21
4.02_155.1545m/z	155.155	4.01815	pos	Pyrrole, 2-pentyl	HMDB0256996				529065		Organoheterocyclic compounds	Pyrroles	Substituted pyrroles	*	40.1	4.78	M+NH4	C9H15N	1.77889	1.07327	5.93044e-05	0.0207666	-3.20694	0.108296	362.756	3349.66	458.954	314.958	389.512	384.459	224.433	489.226	277.753	1591.64	1545.95	3810.41	3704.74	5093.69	3954.57	3746.64
1.06_520.0063m/z	520.006	1.06302	neg	2',3'-Dideoxyadenosine-5-triphosphate	HMDB0060728	458609			65304	24027-80-3	Nucleosides, nucleotides, and analogues	Purine nucleotides	Purine deoxyribonucleotides	*	46.1	51	M+FA-H	C10H16N5O11P3	4.51949	1.07181	0.0294343	0.11759	0.621672	1.53866	12813.9	8327.94	10834.3	15128.1	14685.4	15268.1	9012.64	16750.7	8017.7	3722.01	9658.83	11415.2	5389.29	12855	9047.54	6207.79
4.19_511.2882m/z	511.288	4.18828	neg	3,3-Bis(4-hydroxyphenyl)pentane		433663		C15206	2288503		Unclassified	Unclassified	Unclassified	*	37.7	0	2M-H	C17H20O2	5.56378	1.06996	0.0131965	0.0853871	1.14086	2.20513	7344.46	3330.63	8100.56	6556.36	9251.2	3479.2	3155.13	10788.2	10080.6	414.894	3505.72	5809.72	2753.54	5720.01	3443.89	1666.61
3.26_771.2673m/z	771.267	3.25853	neg	Secundifloran		48011	LMPK12050507		10091530		Lipids and lipid-like molecules	Polyketides	Flavonoids	*	38.2	0	2M-H	C21H22O7	1.86676	1.06377	0.00529563	0.0625585	-30.5364	6.42132e-10	2.41397e-06	3759.31	2.41397e-06	2.41397e-06	2.41397e-06	2.41397e-06	2.41397e-06	2.41397e-06	2.41397e-06	1787.65	1467.6	5911.47	1897.53	911.811	8357.27	5981.82
8.54_445.2206m/z	445.221	8.54015	neg	Lucidone B	HMDB0035834	91055			14109411	97653-93-5	Lipids and lipid-like molecules	Prenol lipids	Tetraterpenoids	*	36.5	0	M+FA-H	C24H32O5	-6.49905	1.06273	0.0389494	0.134179	-1.21364	0.431178	2852.23	6614.96	1312.75	2827.76	1663.91	4510.69	3562.44	1812.38	4275.66	10036.4	2215.42	5785.04	14196.1	4389.76	5077.47	4604.6
4.43_139.0764m/z	139.076	4.42587	neg	1-Methyl-1,3-cyclohexadiene	HMDB0031532	87741			121731	1489-56-1	Hydrocarbons	Unsaturated hydrocarbons	Branched unsaturated hydrocarbons	*	39.6	0	M+FA-H	C7H10	-0.690365	1.06022	0.0261693	0.111671	0.458843	1.37444	15846.7	11529.6	16223	17040.1	18841.3	15997.3	12672.5	18470.2	11682.8	7537.12	11476.7	14544.3	8781.92	17926.3	10306.4	10134.5
8.99_334.2354m/z	334.235	8.98742	pos	3-Oxotetradecanoic acid glycerides	HMDB0039848	94395			25080122	128331-49-7	Unclassified	Unclassified	Unclassified	*	38.9	0	M+H	C17H33O6-	1.30215	1.05839	0.0172508	0.0947056	0.323767	1.25159	20230	16163.4	18342.9	17948.4	21812	21218.1	18233.6	21852.4	22202.8	12754.4	16565.9	19388.9	13562.4	21956.2	14599.4	14316.5
1.11_232.1425n	233.15	1.11178	pos	Ethylenediamine-N,N'-di-a-butyric acid		2589			164632	498-17-9	Unclassified	Unclassified	Unclassified	*	45.9	32.9	M+H, M+Na, M+H-H2O	C10H20N2O4	0.963031	1.05646	0.0499893	0.15172	-0.55521	0.680558	9704.4	14259.5	5549.9	15745.8	12976.9	7031.58	7245.69	13180.8	6200.07	12412.5	14440.9	18447.3	12503.7	14390.9	19150.9	8470.04
4.39_265.0304m/z	265.03	4.38995	neg	4-Methyl-2-(pyridin-3-yl)-1,3-thiazole-5-carboxylic acid		453164			2763489	39091-01-5	Unclassified	Unclassified	Unclassified	*	36.6	0	M+FA-H	C10H8N2O2S	6.92562	1.05603	0.0126661	0.0843477	-1.45688	0.36428	2253.64	6186.55	1219.55	1953.03	912.685	2904.88	5225.09	1299.83	2260.39	12843	4057.62	4833.69	6343.62	3231	4736.06	7260.88
10.53_285.2669n	308.256	10.5258	pos	iso (4E,15-methyl-d16:1) sphingosine		53905	LMSP01080005		42608345		Lipids and lipid-like molecules	Sphingolipids	Sphingoid bases	*	47.3	41.3	M+H-H2O, M+Na	C17H35NO2	0.479716	1.05298	0.00349228	0.0570144	0.53457	1.44851	10154.5	7010.34	10619.7	10448.2	11098.4	11119.7	7448.52	11059.3	9288.06	4513.13	8885.44	7114.73	4425.52	8831.54	7537.74	7764.25
14.51_118.9924m/z	118.992	14.515	neg	Pentafluoroethane	HMDB0256265						Organohalogen compounds	Organofluorides	Unclassified	*	39.3	0	M-H	C2HF5	-1.20664	1.0495	0.00609823	0.065016	0.467151	1.38238	12937.5	9358.85	13258	14305.4	14957.3	12300.8	10524.7	11823.8	13392.5	6425.12	9121.38	11704.6	7373.53	13382.4	8814.8	8690.17
9.20_380.2563n	403.245	9.19658	pos	Bisnorcholic acid	HMDB0002082	43151	LMST04050005		9547705		Lipids and lipid-like molecules	Steroids and steroid derivatives	Bile acids, alcohols and derivatives	*	38.6	0	M+NH4, M+Na	C22H36O5	0.121756	1.04934	0.031107	0.120233	-1.26275	0.416749	2534.33	6081.19	1200.37	2674.38	1461.33	4786.17	2984.52	1585.51	3048.03	9365.99	2631.25	6160.33	12612.4	4152.32	3924.01	3722.01
1.00_773.0583m/z	773.058	0.997533	neg	Thifensulfuron-methyl	HMDB0258993	68721		C10957	73674	79277-27-3	Organoheterocyclic compounds	Thiophenes	Thiophene carboxylic acids and derivatives	*	36.1	0	2M-H	C12H13N5O6S2	5.37145	1.0471	0.0176854	0.0959643	1.42933	2.69321	6177.1	2293.58	700.009	6907.52	8335.93	5511.53	4172.29	10223.9	7388.56	2.41397e-06	3896.14	4004.55	238.744	4522.4	3393.25	2.41397e-06
0.65_439.0194m/z	439.019	0.648267	pos	Bis(glycerophospho)-glycerol		66064		C03853	440144		Unclassified	Unclassified	Unclassified	*	37.8	0	M+K	C9H22O13P2	6.58757	1.04689	1.6605e-05	0.013905	1.10442	2.15013	5156.61	2398.29	5379.15	4605.73	4744.41	5193.62	4226.07	6172.8	5774.51	2407.09	1666.56	1973.39	2405.64	3845.18	1517.55	2972.59
2.29_328.1393m/z	328.139	2.29025	pos	N-(1-Deoxy-1-fructosyl)phenylalanine	HMDB0037846	92654			101039148	87251-83-0	Organic acids and derivatives	Carboxylic acids and derivatives	Amino acids, peptides, and analogues	**	40.4	0	M+H	C15H21NO7	0.795479	1.04328	0.00199776	0.0499296	-1.7737	0.292458	1275.01	4359.63	467.355	1178.58	1169.49	1176.3	3092.9	584.99	1255.45	5468.6	4248.06	2022.26	7548.75	2481.43	5082.36	3665.97
0.69_76.0400m/z	76.04	0.69025	pos	Glycine	HMDB0000123	20		C00037	750	56-40-6	Organic acids and derivatives	Carboxylic acids and derivatives	Amino acids, peptides, and analogues	**	37.7	0	M+H	C2H5NO2	9.38538	1.04239	0.00639715	0.0664724	-0.664822	0.630767	6029.97	9559.74	5416.92	4557.61	4637.9	6037.2	6080.54	6498.46	8981.14	12207.9	6331.44	8945.99	12334.7	7638.08	8069.27	11390.8
7.15_193.1589m/z	193.159	7.15452	pos	4-(2,6,6-Trimethyl-1,3-cyclohexadien-1-yl)-2-butanone	HMDB0037139	92107			577126	20483-36-7	Lipids and lipid-like molecules	Prenol lipids	Sesquiterpenoids	*	47	41.1	M+H	C13H20O	1.12447	1.04153	0.00236772	0.0515756	0.364821	1.28772	14162.5	10998.1	11868	13481.3	15118.9	14211.1	12591.3	16650.8	15215.9	9736.12	11462.4	12349.6	9754.22	13163.4	9486.01	11034.7
12.71_349.2115m/z	349.211	12.7054	pos	Tetramethrin	HMDB0258915	72185		C18373	83975	7696-12-0	Organoheterocyclic compounds	Isoindoles and derivatives	Isoindolines	*	38.8	0.198	M+NH4	C19H25NO4	-2.13806	1.03843	0.0391119	0.134376	-0.569699	0.673758	10044.9	14908.8	7645.37	7478.79	10600.8	14936.2	14508.7	7453.68	7690.67	13717.6	17927.7	10725.8	18147.3	12819	9470.02	21553.9
4.41_520.2759m/z	520.276	4.41037	pos	3-Oxo-alpha-ionol 9-[apiosyl-(1->6)-glucoside]	HMDB0040672	95150			131752900	143363-62-6	Lipids and lipid-like molecules	Fatty Acyls	Fatty acyl glycosides	*	42.5	25	M+NH4	C24H38O11	1.24003	1.0381	0.0219065	0.103244	-2.172	0.221903	1049.21	4728.23	677.878	1094.65	603.754	515.775	2814.74	896.197	741.461	10276.4	3777.86	1967.03	9024.83	544.451	4477.2	3029.83
12.86_375.2271m/z	375.227	12.8642	pos	5-hydroxypropafenone	HMDB0060988	2150			107927	86384-10-3	Phenylpropanoids and polyketides	Linear 1,3-diarylpropanoids	Cinnamylphenols	*	39	1.26	M+NH4	C21H27NO4	-2.1737	1.03543	0.0285458	0.116419	-0.771165	0.585944	5652.85	9647.43	4464.88	4234.61	3715.01	9801.38	10733.8	3470.57	3149.69	11232	7973.17	8619.66	12805.8	7697.98	5934.41	13269
10.95_249.1850m/z	249.185	10.9454	pos	2E,6Z,8Z,12E-hexadecatetraenoic acid		34941	LMFA01030277		5312429		Lipids and lipid-like molecules	Fatty Acyls	Fatty Acids and Conjugates	*	52.5	68.7	M+H	C16H24O2	0.442045	1.03492	0.0205752	0.100941	0.411272	1.32986	15679.7	11790.5	14798.8	15321.2	15092.2	14631.9	13932.7	18519	17462.4	9403.85	12639.3	14595.7	8182.45	17859.9	10841.2	9011.33
1.11_333.0939m/z	333.094	1.1114	neg	(S)-a-Amino-2,5-dihydro-5-oxo-4-isoxazolepropanoic acid N2-glucoside	HMDB0029404	86247			131750866	29790-46-3	Organic oxygen compounds	Organooxygen compounds	Carbohydrates and carbohydrate conjugates	*	42.9	17.5	M-H	C12H18N2O9	-0.0942155	1.03267	0.0205026	0.10087	0.769199	1.70432	8599.39	5045.63	5462.36	9323.22	10156.6	7888.41	10403.4	9842.22	7119.5	3378.11	10787.7	4811.07	1951.64	7124	3100.17	4166.78
0.63_471.2185m/z	471.219	0.628083	pos	Lactose-lysine	HMDB0253951				3082392		Lipids and lipid-like molecules	Saccharolipids	Unclassified	*	37	0	M+H	C18H34N2O12	0.151089	1.03115	0.000455273	0.0356903	1.30983	2.47913	5409.91	2182.18	7099.68	6098.49	3623.71	4292.61	7300.13	3597.35	5857.39	2734.62	1651.48	1638.04	3589.91	997.654	2129.89	2533.66
1.11_279.1320n	262.129	1.11178	pos	N-(1-Deoxy-1-fructosyl)valine	HMDB0037844	92652			131752247		Organic acids and derivatives	Carboxylic acids and derivatives	Amino acids, peptides, and analogues	**	42.7	0	M+H-H2O, M+H	C11H21NO7	0.870155	1.02714	0.00285375	0.05547	-1.2042	0.434011	2478.42	5710.5	4174.65	1880.86	2102.2	2204.89	1728.02	2289.08	2969.21	7970.14	6401.97	2977.07	8554.25	3351.89	5695.89	5022.26
10.47_656.3181m/z	656.318	10.4705	neg	OKOOA-PS			LMGP20040029		134812410		Lipids and lipid-like molecules	Glycerophospholipids	Oxidized glycerophospholipids	*	39.7	9.81	M-H2O-H	C32H54NO12P	-3.59535	1.02556	0.0238285	0.107255	-1.30435	0.404902	2677.81	6613.46	1551.5	313.073	1261.9	558.081	5999.3	1155.98	7904.81	5834.89	5880.39	2808.85	9624.57	4536.48	10328.3	7280.73
2.24_164.0716m/z	164.072	2.23907	neg	L-Phenylalanine	HMDB0000159	28		C00079	6140	63-91-2	Organic acids and derivatives	Carboxylic acids and derivatives	Amino acids, peptides, and analogues	***	63.7	97.6	M-H	C9H11NO2	-0.920113	1.022	0.0466577	0.146928	-0.477278	0.718332	10230.9	14242.6	13142	8910.34	11270.1	6704.97	12279.8	12838.2	6470.99	15650.9	15077.8	9472.02	20202	9845.36	16707	12743
1.09_369.2247m/z	369.225	1.09103	pos	oscr#20			LMFA13040084		86289780		Lipids and lipid-like molecules	Fatty Acyls	Fatty acyl glycosides	*	38.5	0	M+Na	C18H34O6	-0.183598	1.02118	0.000370078	0.0339275	-2.53245	0.172845	544.187	3148.41	909.987	479.353	464.011	724.909	593.569	187.244	450.234	3833.22	1643.32	3288.74	5855.69	2313.66	2762.84	2341.4
6.56_252.1571m/z	252.157	6.55847	pos	Icaridin	HMDB0253340				125098		Organoheterocyclic compounds	Piperidines	Piperidinecarboxylic acids and derivatives	*	39.4	0	M+Na	C12H23NO3	0.25731	1.02115	0.0026993	0.0541069	0.416938	1.33509	12192.2	9132.11	10515.7	12217	11690.3	12569	10437.9	14757.8	13157.8	7981.91	9413.51	10182.8	7427.79	11890.9	8221.43	8806.51
6.41_245.0793m/z	245.079	6.41138	neg	N-(2-Pyrimidinyl)formamide	HMDB0252442				255580		Organic nitrogen compounds	Organonitrogen compounds	N-arylamides	*	45.9	35	2M-H	C5H5N3O	0.396383	1.01967	0.0404223	0.136867	-0.496299	0.708923	8352.4	11781.8	7825.16	8610.73	6254.99	9603.33	10034.9	5447.16	10690.6	13110.9	6662.24	13191.7	17641.3	9428	11452.2	10986.4
7.68_397.1964m/z	397.196	7.68147	pos	Kinetensin 1-3	HMDB0012983	20333			134159843	138482-55-0	Organic acids and derivatives	Carboxylic acids and derivatives	Amino acids, peptides, and analogues	*	39.2	0	M+K	C15H30N6O4	0.949061	1.01958	0.0120361	0.0824181	-1.17249	0.443655	2621.94	5909.88	1725.41	2073.18	1776	3216.45	4156.82	1015.23	4390.52	9314.5	3375.11	5957.08	9546.97	3334.18	3939.31	5902
0.69_367.2744m/z	367.274	0.69025	pos	Abiraterone	HMDB0247752				21879648		Lipids and lipid-like molecules	Steroids and steroid derivatives	Androstane steroids	*	37.6	0	M+NH4	C24H31NO	0.0870526	1.01849	0.00468375	0.0613087	-3.45768	0.0910197	295.991	3251.95	2.41397e-06	501.433	829.566	740.938	2.41397e-06	2.41397e-06	2.41397e-06	6271.6	1413.02	4579.79	5843.08	1749.67	1397.45	1509.01
9.62_359.2195m/z	359.22	9.62305	pos	11-peroxy-5Z,8Z,12E,14Z-eicosatetraenoate	HMDB0060099				131769821		Lipids and lipid-like molecules	Fatty Acyls	Fatty acids and conjugates	*	55.1	82.2	M+Na	C20H32O4	0.696228	1.01766	0.039007	0.134253	-0.692792	0.618656	5816.4	9401.68	4664.05	5759.83	3677.76	7898.11	7707.88	3574.33	7432.87	10565.1	5557.54	10835.1	15800.7	6087.25	6567.81	10398.2
4.68_595.2772m/z	595.277	4.677	neg	adonitoxin		57789	LMST01120020	C08843	441838		Lipids and lipid-like molecules	Steroids and steroid derivatives	Sterols	*	38.6	0	M+FA-H	C29H42O10	2.12334	1.01724	0.0105257	0.0788077	-2.84258	0.139412	597.575	4286.4	194.107	2.41397e-06	2.41397e-06	2.41397e-06	846.811	2.41397e-06	3142.11	8639.87	3514.5	1020.72	6117.54	2.41397e-06	5453.5	5258.7
0.82_815.0413m/z	815.041	0.816917	neg	oxalyl-CoA	HMDB0304445				25201721		Lipids and lipid-like molecules	Fatty Acyls	Fatty acyl thioesters	*	36.7	0	M-H2O-H	C23H31N7O19P3S-5	-1.98015	1.01317	0.012072	0.0824687	-1.54244	0.343304	1863.81	5429.04	8817.64	377.46	166.241	1974.36	580.317	120.846	1009.81	5833.72	4682.25	5291.14	6105.64	4866.66	4996.72	6227.17
12.28_467.2772m/z	467.277	12.2753	pos	ascr#31			LMFA13040022		86289702		Lipids and lipid-like molecules	Fatty Acyls	Fatty acyl glycosides	*	44.1	25	M+K	C24H44O6	0.549405	1.01304	0.00765929	0.0706595	-0.967457	0.511407	3587.16	7014.31	2542.88	2671.71	2665.53	5254.11	3479.3	3753.06	4743.55	11934.8	6189.61	6791.37	8422.42	4262.31	4407.73	7091.89
0.77_131.0817m/z	131.082	0.76685	pos	Cucurbitine		68147		C10140	442634	6807-92-7	Unclassified	Unclassified	Unclassified	*	46.4	37.3	M+H	C5H10N2O2	1.56044	1.0117	0.00337347	0.0569514	1.38453	2.61087	5593.45	2142.37	4862.65	6605.9	5928.16	6792.37	1392.13	6366.94	7205.97	578.282	958.538	4038.11	3493.61	3454.93	1983.25	489.88
9.66_400.2460n	423.235	9.65823	pos	MG(5-iso PGF2VI/0:0/0:0)	HMDB0260485						Unclassified	Unclassified	Unclassified	*	38.8	0.0132	M+H-H2O, M+Na	C21H36O7	-0.224185	1.01109	0.0339617	0.125404	-1.03473	0.488106	3781.55	7747.39	3336.32	4862.85	3838.43	3838.34	4655.22	3056.43	2883.25	12862.9	5331.03	2996.36	13535.6	3821.88	5793.36	9890.58
7.41_491.1193m/z	491.119	7.40848	neg	Swertisin		49400	LMPK12110972		124034		Lipids and lipid-like molecules	Polyketides	Flavonoids	*	39.5	0	M+FA-H	C22H22O10	-0.418794	1.00782	0.0253142	0.109674	0.465563	1.38086	13517.3	9789.05	12180.9	14721.7	15635	13361.2	9739.4	16558.2	12424.4	7560.26	9996.65	11810.2	7273.12	15761.5	7957.41	8164.25
0.75_318.0590m/z	318.059	0.7523	neg	N-Gluconyl ethanolamine phosphate	HMDB0032294	88338			71587802	791807-20-0	Organic acids and derivatives	Organic phosphoric acids and derivatives	Phosphate esters	*	41.4	14.3	M-H	C8H18NO10P	-1.87582	1.00524	0.0481584	0.149325	-0.964727	0.512375	4785.15	9339.15	5146.84	1547.32	2552.71	4186	3917.78	10876.4	5269.01	8301.9	10782.3	5115.9	10535.7	2853.38	17055	10729.9
11.57_609.3402m/z	609.34	11.5679	pos	DG(8:0/6 keto-PGF1alpha/0:0)	HMDB0297119						Unclassified	Unclassified	Unclassified	*	39.1	0	M+K	C31H54O9	0.53453	1.00071	0.00599778	0.0649549	0.57923	1.49405	9038.2	6049.46	8899.69	8920.02	8970.85	9181.65	6924.83	10553.1	9817.31	3932.69	7871.03	8342.58	3221.92	7963.94	4765.42	6248.6
1.38_361.1062n	360.099	1.38147	neg	5-Hydroxyomeprazole	HMDB0014010	1636			119560	92340-57-3	Organoheterocyclic compounds	Benzimidazoles	Sulfinylbenzimidazoles	*	36.1	9.02	M-H, M+FA-H	C17H19N3O4S	-9.60863	1.00064	0.00495984	0.0617697	-0.828048	0.563291	4220.25	7492.14	4127.97	3564.34	4906	4044.78	4844.43	5856.89	2197.36	7572.44	8993.83	5996.42	9909.93	3237.74	8169.38	8565.22

## Sheet: MMC_Mcontrol
ID	m/z	Retention time (min)	Ion mode	Metabolites	HMDB	METLIN	Lipidmaps	kegg	PubChem	CAS	Super Class	Class	Sub Class	level	Score	Fragmentation Score	Adducts	Formula	Mass Error (ppm)	VIP	P-value	adj.P-value	log2(FC)	FC	average(MMC)	average(Mcontrol)	MM1	MM2	MM3	MM4	MM5	MM6	MM7	MO1	MO2	MO3	MO4	MO5	MO6	MO7
0.79_347.0633n	348.071	0.787683	pos	Adenosine monophosphate	HMDB0000045	5111		C00020	6083	61-19-8	Nucleosides, nucleotides, and analogues	Purine nucleotides	Purine ribonucleotides	***	68.9	89.9	M+H, M+Na	C10H14N5O7P	0.646216	21.4502	0.00231528	0.0150463	1.09679	2.13878	3.73432e+06	1.746e+06	4.2889e+06	3.57793e+06	3.55653e+06	3.42919e+06	4.02039e+06	4.14973e+06	3.11755e+06	101694	2.18172e+06	3.02605e+06	825224	3.59358e+06	1.88947e+06	604277
12.78_264.2454n	282.279	12.7785	pos	(�)-(Z)-2-(5-Tetradecenyl)cyclobutanone	HMDB0037543	92402			10825540	173074-85-6	Organic oxygen compounds	Organooxygen compounds	Carbonyl compounds	*	50	54	M+H, M+NH4, M+H-H2O	C18H32O	0.200132	16.5001	0.00316254	0.0177684	0.547664	1.46172	3.74543e+06	2.56235e+06	3.85488e+06	2.93725e+06	3.25139e+06	5.13618e+06	3.67743e+06	3.93018e+06	3.43073e+06	2.08037e+06	2.54314e+06	2.82727e+06	2.23255e+06	3.4931e+06	2.27763e+06	2.48242e+06
4.92_171.1261n	194.115	4.91752	pos	2-Amino-3-cyclohexylpropanoic acid	HMDB0244979				95475		Organic acids and derivatives	Carboxylic acids and derivatives	Amino acids, peptides, and analogues	*	41.4	10	M+Na, M+K	C9H17NO2	0.906613	15.3396	0.00173888	0.0131231	0.736222	1.66581	2.47251e+06	1.48427e+06	2.45892e+06	1.97904e+06	2.10367e+06	3.6806e+06	2.4118e+06	2.57983e+06	2.0937e+06	1.36975e+06	1.39924e+06	1.62649e+06	1.29632e+06	2.10535e+06	1.18643e+06	1.4063e+06
0.73_606.0740m/z	606.074	0.730267	neg	Uridine diphosphate-N-acetylgalactosamine	HMDB0000304				1167	7277-98-7	Nucleosides, nucleotides, and analogues	Pyrimidine nucleotides	Pyrimidine nucleotide sugars	***	64	98.1	M-H	C17H27N3O17P2	-0.551013	15.2234	0.000916188	0.00920407	0.988799	1.98453	1.96188e+06	988585	1.64189e+06	2.29086e+06	2.66154e+06	1.68479e+06	2.39981e+06	1.6081e+06	1.44617e+06	457608	1.30649e+06	1.26315e+06	694470	1.33924e+06	1.08949e+06	769649
14.56_88.0763m/z	88.0763	14.5608	pos	2-(1-Aziridinyl)ethanol		73039		C19332	14074	1072-52-2	Unclassified	Unclassified	Unclassified	*	51	63.6	M+H	C4H9NO	6.62065	13.8061	8.70161e-06	0.000618539	0.789088	1.72798	1.59521e+06	923165	1.62413e+06	1.41854e+06	1.40099e+06	2.01623e+06	1.53961e+06	1.72342e+06	1.44357e+06	840628	900345	983305	903658	1.11512e+06	904825	814273
0.82_348.0470n	347.04	0.816917	neg	Inosinic acid	HMDB0000175	5196		C00130	8582	131-99-7	Nucleosides, nucleotides, and analogues	Purine nucleotides	Purine ribonucleotides	***	59.2	90.8	M-H, 2M-H	C10H13N4O8P	-0.196582	13.0148	2.65092e-06	0.000334938	-2.90648	0.133371	90812.4	680900	24570.4	69561.7	81197.2	6773.39	86039	64712.9	302832	739032	611821	737560	740107	491559	497760	948463
10.95_521.3485n	522.356	10.9454	pos	LysoPC(18:1(11Z)/0:0)	HMDB0010385	61695	LMGP01050138	C04230	53480465		Lipids and lipid-like molecules	Glycerophospholipids	Glycerophosphocholines	***	64.3	86.8	M+H, M+K, M+Na	C26H52NO7P	0.735394	12.5244	0.000943357	0.0093563	-1.48453	0.357366	326078	912448	155583	395773	296946	559225	374083	89670.6	411266	1.40195e+06	637471	741563	1.21979e+06	981277	898129	506949
1.00_347.0630n	346.056	0.997533	neg	3'-AMP	HMDB0003540	63401		C01367	41211	84-21-9	Nucleosides, nucleotides, and analogues	Ribonucleoside 3'-phosphates	Unclassified	***	49.7	50.5	M-H, 2M-H	C10H14N5O7P	-0.304914	9.70909	0.0162476	0.0473892	0.934624	1.91139	1.01814e+06	532671	1.04529e+06	1.18165e+06	978370	697109	1.32561e+06	1.15181e+06	747149	27742.2	699871	887951	216258	1.0761e+06	651544	169235
9.51_215.1578m/z	215.158	9.50793	pos	4-Ethyl-2-hexylthiazole	HMDB0040111	94652			55271529	96693-85-5	Organoheterocyclic compounds	Azoles	Thiazoles	*	40.9	7.53	M+NH4	C11H19NS	0.855249	9.5474	0.00108325	0.0101003	-10.1626	0.000872473	311.467	356994	295.185	275.328	292.899	442.117	301.46	343.713	229.569	85485.7	230394	615070	401178	613023	444287	109519
4.92_154.0994n	172.133	4.91752	pos	4-Oxo-2-nonenal	HMDB0060285	45397	LMFA06000254		6445537	103560-62-9	Organic oxygen compounds	Organooxygen compounds	Carbonyl compounds	*	44.7	31.9	M+H, M+NH4, M+H-H2O	C9H14O2	0.434269	9.25154	0.000392041	0.00569636	0.738554	1.6685	841620	504416	823659	685216	736236	1.15773e+06	836558	897827	754116	456399	474239	559844	452395	696367	407802	483868
13.12_766.5737m/z	766.574	13.1211	pos	PC(20:3(6,8,11)-OH(5)/P-16:0)	HMDB0289524						Unclassified	Unclassified	Unclassified	*	50.2	64.8	M+H-H2O	C44H82NO8P	-1.06125	9.21455	0.0101541	0.0348862	0.638928	1.55717	1.13378e+06	728102	1.28589e+06	1.11337e+06	1.00185e+06	1.23035e+06	1.10622e+06	1.2247e+06	974077	136051	587200	913402	660389	1.21364e+06	735780	850252
13.44_788.5563m/z	788.556	13.4412	pos	PC(P-18:1(9Z)/18:3(9Z,12Z,15Z))	HMDB0011312	62128			53480807		Lipids and lipid-like molecules	Glycerophospholipids	Glycerophosphocholines	*	45.2	63.5	M+Na	C44H80NO7P	-0.246771	9.14045	0.0272877	0.0673352	0.412529	1.33102	1.76339e+06	1.32484e+06	2.03914e+06	1.62197e+06	1.61589e+06	2.1065e+06	1.58256e+06	1.7311e+06	1.64656e+06	645041	1.14965e+06	1.43797e+06	1.12773e+06	1.93674e+06	1.37795e+06	1.59882e+06
1.29_536.1620n	559.151	1.28688	pos	1,4-beta-D-Glucan	HMDB0006944	58599		C00760	53477911		Unclassified	Unclassified	Unclassified	*	38.8	3.89	M+Na, M+K, M+H	C18H32O18	5.76943	9.02586	0.0016161	0.0126474	-2.15386	0.224711	98969.1	440429	51728.2	152529	33990.8	5182.38	74271.6	98622	276460	790801	297470	291699	414518	333704	292339	662472
12.59_820.5848m/z	820.585	12.5869	pos	PE(20:4(5Z,8Z,11Z,14Z)/22:2(13Z,16Z))	HMDB0009404	60800	LMGP02010959	C00350	52924660		Lipids and lipid-like molecules	Glycerophospholipids	Glycerophosphoethanolamines	*	37	0	M+H	C47H82NO8P	-0.345941	8.8595	0.00146547	0.0119417	0.785517	1.72371	778476	451628	902727	798090	703049	1.0364e+06	705991	734407	568667	341328	248158	555099	407976	698785	458982	451070
10.57_156.9908m/z	156.991	10.5712	pos	Phosphoglycolic acid	HMDB0000816	5780		C00988	529	13147-57-4	Organic acids and derivatives	Organic phosphoric acids and derivatives	Phosphate esters	*	38.4	2.26	M+H	C2H5O6P	7.21163	8.3659	0.00207381	0.0143208	0.624605	1.54179	829513	538020	841244	727816	742219	1.1247e+06	822339	864874	683398	402947	557760	661684	404064	757072	465135	517478
0.73_504.1692n	527.159	0.72705	pos	Levan	HMDB0003539	6945		C01355	22833608	9013-95-0	Organic oxygen compounds	Organooxygen compounds	Carbohydrates and carbohydrate conjugates	*	49.3	49.7	M+H-H2O, M+K, M+H, M+NH4, M+Na	C18H32O16	0.349111	8.26572	0.0481302	0.0997265	0.742853	1.67348	939830	561601	1.20337e+06	902713	643233	1.26775e+06	235593	1.14435e+06	1.1818e+06	919425	582229	276442	637150	366957	324554	824453
0.63_146.1057n	147.113	0.628083	pos	L-Lysine	HMDB0000182	5200		C00047	5962	56-87-1	Organic acids and derivatives	Carboxylic acids and derivatives	Amino acids, peptides, and analogues	***	59.7	98.7	M+H-H2O, M+H	C6H14N2O2	1.49791	7.69425	5.47401e-07	0.000142455	0.875499	1.83464	468844	255551	444752	459121	490983	482865	491930	449592	462667	266237	221789	284221	361443	227335	234155	193676
0.69_488.1077n	489.115	0.69025	pos	Citicoline	HMDB0001413	6229		C00307	13805	987-78-0	Organoheterocyclic compounds	Pteridines and derivatives	Pterins and derivatives	**	44.7	28.8	M+Na, M+K, M+H, M+H-H2O	C14H26N4O11P2	0.857076	7.64244	0.000316985	0.00510809	1.38028	2.60319	371418	142678	291619	324589	406435	532723	449706	364695	230159	54476.1	171250	214079	102237	204952	183802	67951.2
11.79_549.3798n	550.387	11.7946	pos	LysoPC(20:1(11Z)/0:0)	HMDB0010391	61701	LMGP01050131	C04230	52924051		Lipids and lipid-like molecules	Glycerophospholipids	Glycerophosphocholines	***	75.6	92.3	M+H, M+K, M+Na	C28H56NO7P	0.677179	7.35608	0.00270872	0.0164276	-1.51351	0.350259	132100	377148	116769	92913.3	96847.4	270495	66627.9	88884.7	192159	638701	374304	220317	383472	214705	291754	516783
12.71_304.2400n	303.233	12.7102	neg	Arachidonic acid	HMDB0001043	193	LMFA01030001	C00219	444899	506-32-1	Lipids and lipid-like molecules	Fatty Acyls	Fatty acids and conjugates	***	69.4	93.7	M-H, 2M-H, M+FA-H	C20H32O2	-0.627476	7.2219	0.00301626	0.0173169	-0.840881	0.558302	293183	525133	351890	167488	256826	155193	399448	341704	379734	514859	600802	368693	676478	505745	347240	662118
1.27_268.0806n	267.073	1.26793	neg	Inosine	HMDB0000195	84		C00294	6021	58-63-9	Nucleosides, nucleotides, and analogues	Purine nucleosides	Unclassified	***	59.2	83.5	M-H, 2M-H	C10H12N4O5	-0.813255	7.11771	0.000736505	0.0080658	-2.46985	0.180511	43607.5	241579	17778.2	64193	20549.4	10020.1	24041.1	50020.3	118651	396400	136881	260978	151324	347455	113936	284079
10.13_414.2044n	437.194	10.1273	pos	Clausarinol	HMDB0041407	95806			15293564		Phenylpropanoids and polyketides	Coumarins and derivatives	Pyranocoumarins	*	41.2	10.7	M+H, M+NH4, M+Na, M+H-H2O	C24H30O6	0.334479	7.08793	0.00446555	0.0214494	0.6727	1.59405	621034	389594	522362	394998	530479	912018	757081	598792	631507	350482	396936	401956	342865	463916	350566	420438
2.27_324.2172m/z	324.217	2.26825	pos	Phthalsaurediethylhexylester	HMDB0256506				21895657		Benzenoids	Benzene and substituted derivatives	Benzoic acids and derivatives	*	42.2	15.5	M+NH4	C18H26O4	0.943471	6.86565	0.000367338	0.0054696	0.99408	1.99181	370882	186204	338425	286073	343215	555788	345597	401555	325525	148010	170669	210466	148667	277192	156709	191713
0.75_427.0298n	428.037	0.745533	pos	ADP	HMDB0001341	6175		C00008	6022	58-64-0	Nucleosides, nucleotides, and analogues	Purine nucleotides	Purine ribonucleotides	***	61.2	95.5	M+H, M+Na	C10H15N5O10P2	0.925282	6.81311	0.00582183	0.0248719	2.85005	7.21025	240366	33336.7	238647	128793	245046	574341	245386	185981	64366.2	14850.6	30253.1	54203.7	19329	72140.3	25056.7	17523.2
0.55_245.2337m/z	245.234	0.554217	pos	N1-Acetylspermine	HMDB0001186	3369		C02567	916	25593-72-0	Organic acids and derivatives	Carboxylic acids and derivatives	Carboxylic acid derivatives	***	49.5	62	M+H	C12H28N4O	0.514644	6.67256	0.00245989	0.0155909	-0.971087	0.510122	215414	422280	205307	193490	159289	259244	218216	230571	241783	637417	457787	228631	328808	347116	403217	552985
3.89_333.1726n	356.162	3.89272	pos	(alphaS,betaS)-alpha-Ethyl-alpha-(4-methoxyphenyl)-beta-phenyl-2-pyridineethanol		70922		C15458	11954179		Unclassified	Unclassified	Unclassified	*	44.9	34.2	M+H, M+Na, M+K	C22H23NO2	-0.819383	6.66202	0.00233044	0.0150937	1.54266	2.91331	296411	101744	262017	211611	246805	561895	328781	226630	237140	50158	86430.2	196189	83779.6	152379	85510.6	57760.3
10.80_295.2513n	318.241	10.805	pos	(4E,8E,10E-d18:3)sphingosine		53913	LMSP01080013		42608349		Lipids and lipid-like molecules	Sphingolipids	Sphingoid bases	*	46.8	39.7	M+H, M+Na	C18H33NO2	0.618903	6.4482	0.00131474	0.0112482	0.679655	1.60176	445015	277829	464874	372277	387483	586421	420388	499247	384417	209511	292698	350348	192343	390886	244779	264240
1.16_164.0475n	182.081	1.15645	pos	2-Hydroxycinnamic acid	HMDB0002641	6727		C01772	637540	614-60-8	Phenylpropanoids and polyketides	Cinnamic acids and derivatives	Hydroxycinnamic acids and derivatives	*	53.3	68.5	M+H, M+NH4, M+H-H2O	C9H8O3	1.05055	6.35819	0.0430582	0.092356	-0.496681	0.708736	528108	745141	547744	643901	595576	423480	544939	371807	569311	909169	596657	583226	1.16895e+06	469161	746098	742726
11.34_296.1625n	279.159	11.3373	pos	Ovalicin	HMDB0038120			C09674	284995	19683-98-8	Organic oxygen compounds	Organooxygen compounds	Alcohols and polyols	*	41.5	17.2	M+H-H2O, M+H	C16H24O5	0.459496	6.32693	0.0197608	0.0539709	0.75902	1.69234	513224	303263	462689	402283	426394	945426	481254	432129	442396	206510	280124	373504	251710	432085	283585	295323
0.69_203.1504m/z	203.15	0.69025	pos	Asymmetric dimethylarginine	HMDB0001539	6309		C03626	123831	30315-93-6	Organic acids and derivatives	Carboxylic acids and derivatives	Amino acids, peptides, and analogues	***	56.2	88.3	M+H	C8H18N4O2	0.908055	6.16728	0.00933394	0.0330467	-1.99622	0.250657	57189	228157	33771.7	103928	48496.2	25995.9	53247.2	52849.4	82034.8	395237	100797	146153	460597	101988	172162	220161
0.79_324.0356n	323.028	0.794883	neg	Uridine 5'-monophosphate	HMDB0000288			C00105	6030	58-97-9	Nucleosides, nucleotides, and analogues	Pyrimidine nucleotides	Pyrimidine ribonucleotides	***	64.8	87.5	M-H, 2M-H	C9H13N2O9P	-0.686897	6.15415	0.00230556	0.0150223	3.06048	8.34249	178580	21406.1	187378	59685.5	291363	156039	301808	231045	22744	32340.3	28307.2	19675.7	15768.6	11915.7	21990.9	19844.4
3.78_202.0444m/z	202.044	3.78143	pos	L-Oxalylalbizziine	HMDB0039164	93758			14632981	99694-81-2	Organic acids and derivatives	Carboxylic acids and derivatives	Amino acids, peptides, and analogues	*	38	0	M+H-H2O	C6H9N3O6	-6.41711	6.10894	0.00929616	0.0329647	0.430205	1.34743	695804	516395	693444	610708	619395	950868	649744	702360	644110	448792	516181	608107	431342	692878	447644	469823
13.12_330.2557n	329.248	13.1195	neg	Docosapentaenoic acid (22n-6)	HMDB0001976	6412	LMFA04000064		6441454	25448-00-4	Lipids and lipid-like molecules	Fatty Acyls	Fatty acids and conjugates	***	63	92.2	M-H, 2M-H, M+FA-H	C22H34O2	-0.42473	6.10687	0.00156227	0.0123986	-1.23666	0.424355	112516	265147	154010	70939.1	107815	33066.2	114677	150452	156655	352154	229399	175298	408461	234503	178928	277283
0.71_260.0294n	259.022	0.71145	neg	Glucose 6-phosphate	HMDB0001401			C00092	5958	56-73-5	Organic oxygen compounds	Organooxygen compounds	Carbohydrates and carbohydrate conjugates	***	59.2	78.1	M-H, 2M-H, M-H2O-H	C6H13O9P	-1.06892	6.09118	0.00780982	0.0296154	-1.18499	0.439826	122732	279046	38060.3	206309	47449.9	23971.4	215893	63840.1	263598	245017	286335	390898	241016	388570	202253	199231
0.77_205.1315n	188.128	0.76685	pos	Pantothenol	HMDB0304820						Lipids and lipid-like molecules	Fatty Acyls	Fatty amides	*	41.5	10.6	M+H-H2O, M+H, M+K	C9H19NO4	0.624852	5.89212	0.00328988	0.0181034	-1.63595	0.321759	71167.7	221183	52567.8	73708.2	36931.3	22796	37551.3	98082.9	176537	407206	148594	161793	236169	138887	186556	269077
0.71_129.0428n	147.077	0.708033	pos	pyrrolidone carboxylic acid	HMDB0257001						Organoheterocyclic compounds	Pyrrolidines	Pyrrolidones	***	50.7	60.9	M+H, M+NH4	C5H7NO3	1.32025	5.85609	0.0295248	0.0711256	0.310017	1.23972	961150	775294	1.12652e+06	966660	824798	999498	1.07477e+06	931144	804651	822113	750637	644540	1.1019e+06	673176	652346	782341
12.03_262.2298n	280.264	12.0291	pos	2-(5,8-Tetradecadienyl)cyclobutanone	HMDB0037519	92389			101929256	152245-81-3	Organic oxygen compounds	Organooxygen compounds	Carbonyl compounds	*	51.7	65.2	M+H, M+NH4, M+H-H2O	C18H30O	0.471726	5.77502	0.0160554	0.0469308	0.548328	1.46239	529808	362289	447027	454157	467354	810518	542598	561006	425996	239195	364515	433268	312984	496910	314488	374663
12.12_302.2244n	301.217	12.1219	neg	Eicosapentaenoic acid	HMDB0001999	6423	LMFA01030759	C06428	446284	10417-94-4	Lipids and lipid-like molecules	Fatty Acyls	Fatty acids and conjugates	***	70.5	75.1	M-H, 2M-H, M+FA-H	C20H30O2	-0.54974	5.73511	0.0227733	0.0593891	-0.494771	0.709674	397819	560566	330022	208103	443204	231389	508411	470153	593455	638658	590737	441126	541884	633421	470954	607184
14.54_136.0216m/z	136.022	14.5402	pos	1,2-Benzisothiazole	HMDB0244057				9225		Organoheterocyclic compounds	Benzothiazoles	Unclassified	*	40.3	5.34	M+H	C7H5NS	0.656775	5.45572	0.0036572	0.0192185	0.498164	1.41242	447516	316845	436054	371319	400322	613050	449336	464286	398247	291147	315842	371816	260957	405715	269956	302479
10.44_200.2010m/z	200.201	10.4438	pos	Dodecanamide	HMDB0251566	36671	LMFA08010001	C13831	14256		Lipids and lipid-like molecules	Fatty Acyls	Fatty amides	*	45	27.6	M+H	C12H25NO	0.647598	5.4089	0.00228101	0.015	0.842016	1.79255	283432	158117	298215	238933	246995	394943	319363	277460	208117	115542	149339	173195	116833	284996	122494	144415
9.86_437.1937m/z	437.194	9.8555	pos	Armillaripin	HMDB0030404	86949			21124297	129741-56-6	Lipids and lipid-like molecules	Prenol lipids	Sesquiterpenoids	*	46.5	37.4	M+Na	C24H30O6	0.554992	5.40153	0.0138604	0.0426045	0.651405	1.5707	415254	264375	386712	310844	352406	619810	582671	310156	344178	204630	250606	245911	254770	355874	293010	245829
7.50_187.1264m/z	187.126	7.49575	pos	5-Ethyl-2-methyl-4-propylthiazole	HMDB0040078	94619			588155	4276-67-9	Organoheterocyclic compounds	Azoles	Thiazoles	*	38.1	5.1	M+NH4	C9H15NS	0.565029	5.1195	0.00570417	0.0245636	-6.66225	0.00987334	1125.88	114033	1068.37	950.466	1039.35	1623.48	1135.82	1147.89	915.814	17980.2	41878.5	238515	118305	206377	149364	25809.3
11.16_554.3459m/z	554.346	11.163	neg	LysoPC(17:0/0:0)	HMDB0012108	62785	LMGP01050024	C04230	24779463	50930-23-9	Lipids and lipid-like molecules	Glycerophospholipids	Glycerophosphocholines	***	67.3	98	M+FA-H	C25H52NO7P	-0.821519	5.11636	0.0173954	0.0494627	-0.400808	0.757434	364362	481048	308262	430836	371669	462270	396026	231082	350387	454036	352036	487251	567327	594597	448951	463136
6.68_211.1573n	234.147	6.67698	pos	Elaeokanine C		329845		C10592	442855	33023-03-9	Unclassified	Unclassified	Unclassified	*	39.5	0.263	M+Na, M+K, M+H	C12H21NO2	0.418704	5.09724	0.000838084	0.00869812	0.76305	1.69707	251123	147974	241844	197627	235513	370919	250650	255588	205720	127323	155412	168883	121982	182804	127008	152406
0.57_179.1286m/z	179.129	0.571967	pos	[3-[(2R,6S)-2,6-Dimethylpiperidin-1-yl]-4H-oxadiazol-3-ium-5-ylidene]azanide	HMDB0249694				20083384		Organoheterocyclic compounds	Piperidines	Unclassified	*	39	7.67	M+H-H2O	C9H16N4O	-2.76328	5.09387	0.0317496	0.0749813	0.563306	1.47765	441641	298880	369074	307590	348359	533729	479981	587375	465379	141586	353604	443492	179212	429059	274993	270215
14.51_109.0042m/z	109.004	14.515	neg	Barbituric acid	HMDB0041833	63410		C00813	6211	67-52-7	Organoheterocyclic compounds	Diazines	Pyrimidines and pyrimidine derivatives	*	42.8	20.3	M-H2O-H	C4H4N2O3	-0.945378	5.04502	0.0315683	0.0746743	0.338526	1.26446	677238	535593	663516	616139	683128	729830	742008	746252	559794	380042	552109	628825	425230	786282	499414	477250
8.05_273.2668n	274.274	8.05053	pos	C16 Sphinganine		41556	LMSP01040001	C13915	656816		Lipids and lipid-like molecules	Sphingolipids	Sphingoid bases	*	54.7	76.7	M+H, M+Na	C16H35NO2	0.244213	5.00064	0.0228983	0.0595813	0.973966	1.96423	271242	138090	232314	143246	211410	398722	514707	198932	199361	124819	141974	137304	110891	147967	133203	170474
12.53_256.2635m/z	256.264	12.5259	pos	Palmitic amide	HMDB0012273	62905	LMFA08010009		69421	629-54-9	Lipids and lipid-like molecules	Fatty Acyls	Fatty amides	***	45.5	34.3	M+H	C16H33NO	0.0748583	4.84391	0.00287738	0.0168877	0.540171	1.45415	323321	222344	322983	252782	278054	441667	326631	355925	285205	181410	212077	236105	214971	289767	196766	225315
0.79_180.0633n	179.056	0.794883	neg	D-Fructose	HMDB0000660			C02336	439709	53188-23-1	Organic oxygen compounds	Organooxygen compounds	Carbohydrates and carbohydrate conjugates	***	54.3	73.3	M-H, 2M-H	C6H12O6	-0.452021	4.83919	0.000101918	0.00267793	1.66254	3.16574	132377	41815.6	134366	138498	196269	59991.9	156101	121752	119662	29118.7	43700.1	44580.7	45269.5	37321	56875.6	35843.3
9.86_414.2044n	453.168	9.8555	pos	19-oxodesacetylcinobufagin			LMST01130017		11144140		Lipids and lipid-like molecules	Steroids and steroid derivatives	Sterols	*	41.1	7.53	M+H, M+K, M+NH4, M+H-H2O	C24H30O6	0.297805	4.8264	0.0119008	0.0384477	0.675292	1.59692	320923	200964	290654	238384	275392	474775	457110	236564	273582	163207	185612	183961	197171	270255	223096	183443
0.71_162.1126m/z	162.113	0.708033	pos	L-Carnitine	HMDB0000062	52		C00318		541-15-1	Organic nitrogen compounds	Organonitrogen compounds	Quaternary ammonium salts	***	57.7	90.5	M+H	C7H15NO3	0.500042	4.76077	0.00908493	0.0325421	0.451314	1.36728	438585	320771	401674	422307	326556	425265	490537	503821	499934	289012	268787	404435	259231	455513	281014	287403
11.94_402.2255n	425.215	11.9374	pos	5S-HETE di-endoperoxide		74966	LMFA03000011		52921873		Lipids and lipid-like molecules	Fatty Acyls	Eicosanoids	*	47.2	41.8	M+Na, M+K, M+H	C20H34O8	0.301331	4.74137	0.0116553	0.0379714	0.512916	1.42693	392299	274925	328021	313273	352663	557006	359087	373638	462406	221116	295234	336405	215406	362760	238676	254879
12.87_330.2557n	329.248	12.8712	neg	Docosapentaenoic acid (22n-3)	HMDB0006528	194	LMFA04000044	C16513	5497182	24880-45-3	Lipids and lipid-like molecules	Fatty Acyls	Fatty acids and conjugates	***	64	77.6	M-H, 2M-H, M+FA-H	C22H34O2	-0.446038	4.66204	0.00171752	0.0130373	-1.15195	0.450017	74115.5	164695	104895	42656.2	54008.2	23186.9	68957.2	101215	123889	189642	115069	124761	218935	166628	116231	221599
0.75_174.0642n	175.071	0.745533	pos	Formiminoglutamic acid	HMDB0000854	5817		C00439	439233	816-90-0	Organic acids and derivatives	Carboxylic acids and derivatives	Amino acids, peptides, and analogues	***	64.1	89.1	M+H-H2O, M+Na, M+H	C6H10N2O4	0.84114	4.57753	0.0157406	0.0462822	1.61645	3.06619	178143	58099.2	64012.5	218167	55064.6	120290	282248	160911	346308	87944.5	91095	74792	27984	33614.6	42344.6	48919.4
0.73_97.9673n	96.96	0.730267	neg	Sulfate	HMDB0001448	3233		C00059	1117	14808-79-8	Homogeneous non-metal compounds	Non-metal oxoanionic compounds	Non-metal sulfates	*	38.9	0.297	M-H, 2M-H	H2O4S	-0.818247	4.5356	0.0119079	0.0384635	-1.01008	0.496517	97131.1	195625	103896	108159	68320.8	78181.3	90495.9	161140	69724.9	124158	158693	257096	167322	350036	189261	122809
11.58_481.3172n	482.324	11.58	pos	LysoPE(18:0/0:0)	HMDB0011130	40775	LMGP02050001		9547068	69747-55-3	Lipids and lipid-like molecules	Glycerophospholipids	Glycerophosphoethanolamines	***	68.7	97.8	M+H, M+Na	C23H48NO7P	0.797026	4.508	0.00479109	0.0222529	-1.15825	0.448054	69606.7	155353	90200	70030.7	65992.6	41217.8	57530.5	44527.2	117748	255310	108673	138935	201536	156472	71621.3	154925
10.53_293.2357n	316.225	10.5258	pos	2'-hydroxy-N-(isobutyl)-tetradeca-2E,4E,8Z-trienamide			LMFA08020322		5316694		Lipids and lipid-like molecules	Fatty Acyls	Fatty amides	*	40.2	7.25	M+H, M+Na	C18H31NO2	0.703421	4.43644	0.000921296	0.00922672	0.747794	1.67922	194322	115721	192329	164198	171183	265888	195859	212067	158731	84216.8	121263	139318	84894.3	168113	103800	108446
10.82_566.3460m/z	566.346	10.8233	neg	LysoPC(0:0/18:1(9Z))	HMDB0061701	40348	LMGP01050082		24779494	22248-65-3	Lipids and lipid-like molecules	Glycerophospholipids	Glycerophosphocholines	***	69.2	99.2	M+FA-H	C26H52NO7P	-0.609761	4.35003	0.0164712	0.0478096	-1.64121	0.320587	43553.1	135854	3752.43	59234.7	15505.4	143212	40968.2	3767.65	38431.6	219056	102524	74054.9	202251	71282	216600	65210.8
9.51_294.1470n	317.136	9.50793	pos	Mono-(2-ethyl-5-hydroxyhexyl) phthalate	HMDB0094679				170295		Benzenoids	Benzene and substituted derivatives	Benzoic acids and derivatives	*	43.8	23	M+H-H2O, M+Na, M+H	C16H22O5	0.809669	4.33488	0.000167672	0.00351808	2.55378	5.8717	91526.5	15587.7	61424.5	118157	60299.1	138303	121821	47895.9	92784.1	3709.29	7423.44	33749.3	14777.4	26632.3	18408	4414.33
14.54_142.0744n	125.071	14.5402	pos	Piracetam	HMDB0256585	44173			4843	7491-74-9	Organic acids and derivatives	Carboxylic acids and derivatives	Amino acids, peptides, and analogues	*	43	19.7	M+H-H2O, M+H	C6H10N2O2	1.37795	4.33086	0.00279437	0.016663	0.532865	1.4468	262206	181231	257132	214442	238824	354584	265899	272956	231601	162232	175456	216182	143341	240236	156778	174396
10.74_991.6723m/z	991.672	10.7436	pos	NeuAcalpha2-3Galbeta-Cer(d18:1/16:0)		56047					Unclassified	Unclassified	Unclassified	*	37.4	0	M+H	C51H94N2O16	4.72497	4.24892	0.0280855	0.0686325	-2.46998	0.180494	19100.9	105826	2516.24	19282.5	20355.2	56000.8	18983.9	793.007	15775	182148	33098.9	68050.2	274459	75778.1	79705.9	27540.5
14.51_162.9823m/z	162.982	14.515	neg	Pentafluoropropionic acid	HMDB0256333	337159			62356		Organohalogen compounds	Alkyl halides	Alkyl fluorides	*	42.7	16.4	M-H	C3HF5O2	-0.414955	4.20841	3.28117e-06	0.000370304	1.06087	2.08618	117287	56220.8	121474	109778	118507	126811	124974	128962	90502.1	38491.7	55720.8	64533.3	44759.6	83942	53562.5	52535.5
13.12_738.5421m/z	738.542	13.1211	pos	PC(P-18:1(11Z)/14:0)	HMDB0011269	62089	LMGP01030133		53480729		Lipids and lipid-like molecules	Glycerophospholipids	Glycerophosphocholines	*	37.3	0	M+Na	C40H78NO7P	1.81741	4.19698	0.0325346	0.0762055	0.343306	1.26866	460257	362790	458206	388531	457432	584697	460429	460297	412205	264039	356679	304465	306681	529040	389807	388816
11.25_297.2669n	320.256	11.2543	pos	2S-amino-octadeca-4E,6E-diene-1,3R-diol		53959	LMSP01080059		42608376		Lipids and lipid-like molecules	Sphingolipids	Sphingoid bases	*	47.7	44	M+Na, M+K	C18H35NO2	0.480254	4.17851	0.00363743	0.019191	0.536869	1.45082	246608	169978	240477	203637	217526	333193	239473	262119	229832	144537	183936	213818	127618	222438	150367	147135
7.10_386.2070n	387.214	7.10393	pos	Euglobal IIc	HMDB0030036	86678			73076025	77794-62-8	Organoheterocyclic compounds	Benzopyrans	1-benzopyrans	*	38.1	6.88	M+H, M+Na	C23H30O5	-5.96234	4.1748	0.00594816	0.0252126	0.412908	1.33137	309316	232330	296828	309713	259096	406524	334563	296840	261647	239229	239375	254302	185140	266989	182472	258802
12.14_318.2772n	341.266	12.1388	pos	1-O-(2R-hydroxy-pentadecyl)-sn-glycerol			LMGL01020062		137323863		Lipids and lipid-like molecules	Glycerolipids	Monoradylglycerols	*	41.7	13.6	M+H, M+Na, M+NH4	C18H38O4	0.455153	4.07468	0.0140168	0.0429293	0.804442	1.74647	177189	101456	320870	157153	136069	205028	143223	140245	137735	84541.8	102242	111658	93216.7	131871	86764.3	99895.2
10.57_320.2562m/z	320.256	10.5712	pos	(4E,8Z,d18:2) sphingosine		53911	LMSP01080011		11993697		Lipids and lipid-like molecules	Sphingolipids	Sphingoid bases	*	43	19.2	M+Na	C18H35NO2	0.595379	4.0686	0.000822925	0.00857558	0.737769	1.6676	163381	97974.2	161989	136013	148671	217439	164946	184070	130540	69381.4	103656	121462	73906.8	138325	87159	91929.2
1.00_437.0322n	482.03	0.997533	neg	tigemonam	HMDB0259088				59717		Organoheterocyclic compounds	Lactams	Beta lactams	*	37.4	2.6	M+FA-H, 2M-H, M-H	C12H15N5O9S2	2.54178	4.04095	0.00367332	0.0192267	1.0539	2.07613	140068	67465.8	138718	141839	140993	127869	173625	156156	101276	3296.44	93071	109958	28863.3	131036	80847.3	25188.9
9.50_315.2776n	338.267	9.4962	pos	Dehydrophytosphingosine	HMDB0038057				14757419	3687-54-5	Organic nitrogen compounds	Organonitrogen compounds	Amines	***	62.9	45.4	M+H-H2O, M+H, M+Na	C18H37NO3	0.665174	4.02001	0.00012727	0.00300783	0.642908	1.56147	164641	105439	170413	141839	161433	215596	161109	163894	138202	92666.1	111112	108562	94837.3	124773	92643.8	113480
11.64_568.3616m/z	568.362	11.6419	neg	LysoPC(18:0/0:0)	HMDB0010384	61694	LMGP01050026	C04230	497299	19420-57-6	Lipids and lipid-like molecules	Glycerophospholipids	Glycerophosphocholines	***	67.3	99.7	M+FA-H	C26H54NO7P	-0.726138	3.95175	0.0197854	0.0540206	-0.482368	0.715802	184358	257554	213356	142315	197376	262955	145957	137242	191304	280328	198449	266573	318841	328824	203214	206652
0.73_439.0757m/z	439.076	0.730267	neg	5'-Butyrylphosphouridine		66401		C06436	441018		Unclassified	Unclassified	Unclassified	*	39.6	0	M+FA-H	C13H19N2O10P	-0.590194	3.94951	0.0335881	0.0778573	-0.728522	0.603522	123834	205185	127069	158013	120110	66042.3	46176.3	128441	220983	304768	165516	136205	287807	150718	163578	227701
1.11_307.0835m/z	307.083	1.11178	pos	(+)-Lysergic acid	HMDB0242256				622688		Alkaloids and derivatives	Ergoline and derivatives	Lysergic acids and derivatives	*	39.7	12.8	M+K	C16H16N2O2	-3.12831	3.91487	0.0392685	0.0867021	2.56781	5.92907	102420	17274.3	61932.9	48485.9	110187	303302	124617	52601.6	15816.4	1292.62	45109	15904	1680.12	28222.4	8410.17	20301.7
0.61_186.1007n	204.134	0.609217	pos	Prolyl-Alanine	HMDB0029010	85908			418041		Organic acids and derivatives	Carboxylic acids and derivatives	Amino acids, peptides, and analogues	*	51.2	65.6	M+NH4, M+Na, M+H	C8H14N2O3	1.13276	3.87946	0.0475988	0.0989269	-0.673948	0.626789	121795	194316	87851.2	117730	91711.1	51748.5	131436	140194	231896	223221	126123	187984	323248	196753	154098	148786
13.27_745.4896n	746.497	13.2701	pos	PE(P-16:0/5-iso PGF2VI)	HMDB0285214						Unclassified	Unclassified	Unclassified	*	45.1	31.4	M+H, M+Na	C39H72NO10P	0.312852	3.87695	0.0138895	0.0426744	-0.939886	0.521274	78903.2	151366	77705.1	72363.1	74999.4	39373.8	57465.2	84371.8	146044	275219	125940	136365	140999	118363	101327	161349
13.18_698.5232n	716.557	13.1825	pos	PA(P-20:0/17:2(9Z,12Z))		82306	LMGP10030066		52929721		Lipids and lipid-like molecules	Glycerophospholipids	Glycerophosphates	*	49	55.7	M+NH4, M+Na	C40H75O7P	-2.61874	3.83159	0.0268886	0.0666614	0.471356	1.38641	282590	203828	337041	254562	263945	304096	233243	314868	270374	81913.1	171343	218162	183314	328147	231178	212740
3.89_208.1314n	231.121	3.89272	pos	5S,6S-epoxy-15R-hydroxy-ETE	HMDB0062236				90263		Organic oxygen compounds	Organooxygen compounds	Ethers	*	44.8	27.1	M+Na, M+K, M+H	C9H20O5	1.51421	3.81487	0.000308797	0.00504609	0.971358	1.96068	117658	60008.6	102209	100831	99039.8	161496	115194	114288	130548	40191.3	52493.8	95217.8	35051.9	74306	54790.5	68009.1
9.25_269.1310m/z	269.131	9.24532	neg	Imazamethabenz-methyl	HMDB0034913	90301		C11494	54744	81405-85-8	Benzenoids	Benzene and substituted derivatives	Benzoic acids and derivatives	*	37.8	0	M-H2O-H	C16H20N2O3	5.20071	3.76043	0.0111872	0.0369923	0.415295	1.33357	276183	207100	270720	248136	278362	298687	303752	307328	226298	147545	213343	242362	166137	304794	190280	185243
0.82_209.0666m/z	209.067	0.816917	neg	L-Fucose	HMDB0000174	63169		C01019	439554	6696-41-9	Organic oxygen compounds	Organooxygen compounds	Carbohydrates and carbohydrate conjugates	***	51.2	57.1	M+FA-H	C6H12O5	-0.399442	3.75139	6.60393e-05	0.0020416	3.01045	8.05814	63406.9	7868.67	46348.1	88763.2	69545.8	34612.2	99056.9	46430.9	59091.2	1919.81	5184.86	8005.11	21992.2	6207.95	8623.42	3147.39
4.64_152.0839n	170.118	4.64248	pos	2,6,6-Trimethyl-2-cyclohexene-1,4-dione	HMDB0040216	94747			62374	1125-21-9	Organic oxygen compounds	Organooxygen compounds	Carbonyl compounds	*	49.1	50	M+H, M+NH4, M+H-H2O	C9H12O2	0.890167	3.68404	0.00872469	0.031752	0.480625	1.39535	227298	162897	224478	197329	196157	319834	212629	242667	197993	144742	151658	181696	141486	227427	139780	153490
11.34_301.1412m/z	301.141	11.3373	pos	Glyceryl 5-hydroxydecanoate	HMDB0032297	88341			5463954	26446-31-1	Lipids and lipid-like molecules	Fatty Acyls	Fatty alcohols	*	39.2	4.07	M+K	C13H26O5	-0.0793662	3.66486	0.00789821	0.029808	0.976192	1.96727	131007	66593.5	109924	102635	114413	242669	125122	113416	108871	40795.6	61442.1	79735	55032	103197	66439.4	59513.5
0.73_328.0504n	329.058	0.72705	pos	Sodium 6-hydroxy-5-(phenylazo)-2-naphthalenesulfoniate	HMDB0032902	88811			5473485	1934-20-9	Benzenoids	Naphthalenes	Unclassified	*	41.2	25.2	M+H-H2O, M+H	C16H12N2O4S	-4.32244	3.56766	0.017008	0.0487533	1.31605	2.48983	108742	43674.3	84878.5	84578.9	169878	149737	33499.7	171485	67134.7	24463.5	46062.1	88321	79725.3	29300.4	28899	8948.55
4.70_182.0579n	163.04	4.70173	neg	Isohomovanillic acid	HMDB0000333	5322			160562	1131-94-8	Benzenoids	Phenols	Methoxyphenols	**	43.5	0	M-H2O-H, M-H	C9H10O4	-0.237707	3.55068	0.00492405	0.0226234	-1.45882	0.363791	33095.8	90974.8	29107	41752	24727.2	13115	32411.1	45913.7	44644.5	167852	62816	75677.2	110342	34271.7	76822.4	109042
12.94_898.5525m/z	898.553	12.9386	pos	PGP(18:0/20:3(8Z,11Z,14Z))	HMDB0013511				53481829		Lipids and lipid-like molecules	Glycerophospholipids	Glycerophosphoglycerophosphates	*	36.3	0	M+NH4	C44H82O13P2	-4.94692	3.41779	5.4604e-05	0.00179251	1.53379	2.89545	66402.6	22933.4	59337.8	69632.4	56904.9	98708.7	64682.7	66612.1	48940	15976.5	14168.8	29948.2	16874.3	43168.9	21885.2	18512
1.65_310.1764m/z	310.176	1.64745	pos	Pro-Pro-Pro	HMDB0256689				4475718		Organic acids and derivatives	Carboxylic acids and derivatives	Amino acids, peptides, and analogues	*	47.2	41.7	M+H	C15H23N3O4	0.876815	3.41108	0.000296365	0.00493074	-2.44998	0.183013	9830.12	53712.8	2566.67	23350.6	5237.41	951.685	5803.95	13312.5	17588.1	76543	26667	51893.7	82949	28187.5	52293.9	57455.3
1.11_132.0247n	150.059	1.11178	pos	TETRAHYDRO-2-THIOPHENECARBOXYLIC ACID		330161		C11074	443066		Unclassified	Unclassified	Unclassified	*	53	74	M+H, M+NH4	C5H8O2S	1.53663	3.40083	0.0184356	0.0515133	-0.412179	0.751488	176494	234859	209556	180585	162478	124382	156466	190630	211359	245736	249280	214037	300587	183558	278032	172785
0.84_134.0214n	133.014	0.838583	neg	Malic acid	HMDB0000156	118		C00149	222656	97-67-6	Organic acids and derivatives	Hydroxy acids and derivatives	Beta hydroxy acids and derivatives	***	59.8	92.3	M-H2O-H, M-H	C4H6O5	-0.6704	3.39342	0.0256597	0.0645883	-0.590551	0.664089	108128	162821	72257.6	171727	84890	54908.4	140134	82549.5	150429	130088	151750	176278	143725	235025	151206	151676
0.71_90.0555m/z	90.0555	0.708033	pos	beta-Alanine	HMDB0000056	5119		C00099	239	107-95-9	Organic acids and derivatives	Carboxylic acids and derivatives	Amino acids, peptides, and analogues	***	48.2	51.7	M+H	C3H7NO2	6.4035	3.36141	0.0043925	0.0212213	0.43249	1.34956	199234	147629	224987	168380	232085	221102	203929	167244	176911	190268	144121	124239	179848	124497	126206	144222
4.70_231.0273m/z	231.027	4.70173	neg	Sodium (4-methoxybenzoyloxy)acetate	HMDB0303300				56844155		Benzenoids	Benzene and substituted derivatives	Benzoic acids and derivatives	*	39.5	0	M-H	C10H9NaO5	-0.628215	3.35413	0.00275846	0.0165745	-1.91353	0.265442	17880.3	67360.5	13559.2	25780.3	9090.35	161.008	15957	29157.3	31457.2	123361	45884.1	55689.8	83640.9	21042	57813.2	84093.1
0.83_250.0667n	233.063	0.82825	pos	2-[(5-Methylsulfinyl)-4-penten-2-ynylidene]-1,6-dioxaspiro[4.4]non-3-ene	HMDB0032670	88611			14540702		Organic oxygen compounds	Organooxygen compounds	Ethers	*	37.4	0.0827	M+H-H2O, M+NH4	C13H14O3S	1.4574	3.3412	0.0002143	0.00403514	2.01841	4.05136	61713.1	15232.7	42258.3	86766.6	61944.6	42963.2	97574.7	39333.4	61151.3	8666.86	12480.4	17124	21955.6	22915.7	11157.3	12329.2
10.62_427.3665n	428.374	10.619	pos	Stearoylcarnitine	HMDB0000848	5811				25597-09-5	Lipids and lipid-like molecules	Fatty Acyls	Fatty acid esters	***	63.1	93.4	M+H, M+Na	C25H49NO4	0.760098	3.33154	0.0166785	0.0481733	1.3863	2.61408	92924	35547.5	140522	86835.1	84892.2	20802.2	183788	59746.6	73882.4	21648.5	37166.1	26450.2	52688.3	34436.3	41845.5	34597.8
0.79_136.0618m/z	136.062	0.787683	pos	FAPy-adenine	HMDB0004816	7080		C06502	114926	5122-36-1	Organoheterocyclic compounds	Diazines	Pyrimidines and pyrimidine derivatives	***	51.2	56.4	M+H-H2O	C5H7N5O	0.160448	3.31476	0.000135414	0.00312293	1.25268	2.38284	71508.7	30009.8	76369.2	65538.6	64071.5	80774.9	78656.6	77427.4	57722.6	7815.61	36077	47073.1	17065	55676.2	32426.6	13935.4
1.00_715.1007m/z	715.101	0.997533	neg	Myricetin 3,7-diglucuronide			LMPK12112443		102274234		Lipids and lipid-like molecules	Polyketides	Flavonoids	*	43.9	29.2	M+FA-H	C27H26O20	1.11788	3.27525	0.00547022	0.0239766	1.37507	2.5938	80149.5	30900.5	85938.9	110945	71784.8	40438.4	112240	86210.2	53489.6	2.41397e-06	46337.8	53739	5618.79	66481.2	41243.3	2883.04
14.54_230.1170n	231.124	14.5402	pos	Dicyclohexyl disulfide	HMDB0041448	95844			17356	2550-40-5	Organosulfur compounds	Organic disulfides	Dialkyldisulfides	*	36	0	M+H-H2O, M+H	C12H22S2	2.93206	3.2746	0.00400888	0.0201206	0.510665	1.42471	159754	112131	155178	132288	144727	218477	161910	164331	141369	102686	109191	132139	88131.4	149547	96282.1	106942
13.26_247.1666m/z	247.167	13.2562	pos	S-cucujolide III		97400	LMFA07040046		10867948		Lipids and lipid-like molecules	Fatty Acyls	Fatty esters	*	48.8	50.7	M+Na	C14H24O2	-0.996352	3.27104	0.0112029	0.0370302	0.508623	1.42269	173668	122070	164646	146851	162236	249266	171978	179028	141674	101852	119316	151226	94048.3	169805	101636	116610
11.52_421.2594m/z	421.259	11.5184	neg	5alpha-Androstane-3beta,17beta-diol diacetate		70819		C15346	224008		Unclassified	Unclassified	Unclassified	*	39.2	0	M+FA-H	C23H36O4	-0.462381	3.26524	0.00605899	0.0254995	-2.02337	0.245983	14848.1	60362.4	1772.48	18878.6	5181.52	5278.76	16564	1997.13	54264.2	102971	47058.9	29205.2	93518	25814.8	78057.5	45912
1.29_407.0817m/z	407.082	1.28923	neg	7-O-Galloyl-sedoheptulose	HMDB0247276				74833049		Organic oxygen compounds	Organooxygen compounds	Carbohydrates and carbohydrate conjugates	*	41.8	16.3	M+FA-H	C14H18O11	-3.87274	3.2529	6.25195e-05	0.00197123	-2.29154	0.204257	9720.82	47591	4894.92	13744.3	5310.15	1536.21	5679.21	10692.9	26188	39514.5	32306.2	62859.4	40929.4	66847.9	33020.2	57659.5
2.94_445.1205m/z	445.12	2.94397	pos	Melithiazol A		71030		C15696	23724543		Unclassified	Unclassified	Unclassified	*	36.8	0	M+Na	C20H26N2O4S2	-5.0932	3.22011	0.00180396	0.0133444	0.689888	1.61316	115180	71400.3	110594	93024.3	101323	166795	110780	121668	102076	59270.4	66420.4	84910.1	57895.9	100156	61593	69556.5
0.83_174.0875m/z	174.087	0.82825	pos	4-Hydroxycitrulline	HMDB0029384	86233			87253507	3618-90-4	Organic acids and derivatives	Carboxylic acids and derivatives	Amino acids, peptides, and analogues	*	47.3	45.4	M+H-H2O	C6H13N3O4	0.873083	3.19638	0.0475818	0.0989131	-1.02761	0.490523	59994.4	122307	49580.5	53648.7	33971.6	5380.91	56259.8	104870	116249	243200	86504.1	117699	99237.4	51725.2	90307.9	167474
12.86_706.5386m/z	706.539	12.8642	pos	PA(19:0/16:1(9Z))		81622	LMGP10010456		52929049		Lipids and lipid-like molecules	Glycerophospholipids	Glycerophosphates	*	38.4	0	M+NH4	C38H73O8P	0.636254	3.19575	0.0158775	0.04658	0.714262	1.64064	131404	80092.9	157377	147546	78654.9	129323	110976	144530	151421	3020.91	64017	96322.1	71287.4	123652	103394	98958.1
14.70_201.9757m/z	201.976	14.7033	pos	3-Methylsulfinylpropyl isothiocyanate	HMDB0006095	58356			10455	505-44-2	Organosulfur compounds	Sulfoxides	Unclassified	*	37	0	M+K	C5H9NOS2	0.144456	3.12528	0.00289038	0.0169285	0.536115	1.45006	137874	95081.7	131844	116882	124587	180939	143337	146181	121349	87653.2	87077.6	118742	72833.5	130062	80133	89070.8
0.75_203.0796n	204.087	0.745533	pos	N2-Acetyl-L-aminoadipate		63446		C12986	443992		Unclassified	Unclassified	Unclassified	*	48.4	46.5	M+H-H2O, M+H	C8H13NO5	0.935127	3.09161	0.019994	0.0544202	0.430664	1.34785	193386	143477	197931	219823	239512	137826	161190	192470	204953	162715	144305	101531	175265	89012.3	152563	178949
11.52_376.2615n	377.269	11.5213	pos	MG(0:0/20:5(5Z,8Z,11Z,14Z,17Z)/0:0)	HMDB0011550	62333	LMGL01010026		11660820		Lipids and lipid-like molecules	Endocannabinoids	Unclassified	*	53.4	71.8	M+H, M+Na, M+H-H2O	C23H36O4	0.423895	3.08907	0.00970821	0.0338274	-1.78219	0.290742	17452.5	60027.5	4416.25	25306.6	5285.9	8859.87	17852	5367.64	55079.1	113251	39807	34168.6	75817.6	29082.2	85366.4	42699
10.57_324.2303n	325.238	10.5712	pos	methyl-10-hydroperoxy-8E,12Z,15Z-octadecatrienoate		74463	LMFA01040038		5282873		Lipids and lipid-like molecules	Fatty Acyls	Fatty Acids and Conjugates	*	49.3	50.6	M+H, M+Na, M+H-H2O	C19H32O4	0.5991	3.05734	0.00357004	0.018972	-1.11162	0.462775	37143.4	80262.3	41635.8	38483.6	30451.6	39481.4	45953.8	30838.2	33159.3	109039	105272	69251.6	114030	29707.5	57965	76570.8
0.59_575.2662m/z	575.266	0.58995	pos	Pheophorbide a	HMDB0256449						Unclassified	Unclassified	Unclassified	*	47.2	57.8	M+H-H2O	C35H36N4O5	1.55295	3.0328	0.0065932	0.0266788	1.66524	3.17166	58930.5	18580.3	101360	66630.4	34247.5	56871.6	7677.47	73313.7	72412.9	29980.8	18541.8	4458.89	31219.9	7030.36	8284.49	30546.1
1.11_289.1275n	290.135	1.11178	pos	Ophthalmic acid	HMDB0005765	58300			7018721	495-27-2	Organic acids and derivatives	Carboxylic acids and derivatives	Amino acids, peptides, and analogues	***	61.9	95.6	M+H, M+Na	C11H19N3O6	0.496587	3.01608	0.000330323	0.00519198	1.63974	3.1161	49182.8	15783.5	50145.9	54216.9	59215.2	41929.2	59275.5	52617.8	26879.1	13960.6	45625.2	15979.5	6043.52	6971.74	11107.8	10795.9
12.59_859.6006m/z	859.601	12.5869	pos	PI-Cer(t18:0/18:0(2OH))		103166					Unclassified	Unclassified	Unclassified	*	36.7	0	M+NH4	C42H84NO13P	-1.52262	3.00141	3.72916e-05	0.00141969	0.956258	1.94027	68460.2	35283.9	58658.7	57900.9	73552.6	95145	68257.2	64293.3	61414	33925.5	34437.7	31465.6	30644.7	42719.4	32484.1	41310
14.79_184.9856m/z	184.986	14.7875	pos	Phosphohydroxypyruvic acid	HMDB0001024	484		C03232	105	3913-50-6	Organic oxygen compounds	Organooxygen compounds	Carbonyl compounds	*	38.7	4.01	M+H	C3H5O7P	5.74017	2.99062	0.00238804	0.0152912	0.519633	1.43359	127140	88686.5	124725	115817	114803	168383	127872	131806	106575	76253.1	80551.2	110659	75560.9	116725	79442.9	81613.2
0.63_156.0769m/z	156.077	0.628083	pos	L-Histidine	HMDB0000177	21		C00135	6274	71-00-1	Organic acids and derivatives	Carboxylic acids and derivatives	Amino acids, peptides, and analogues	***	58.9	97.8	M+H	C6H9N3O2	0.965024	2.98984	0.000658873	0.00751839	0.437384	1.35415	149992	110765	143865	147792	161493	137720	158415	134686	165974	126957	108634	100826	143001	83218.6	109884	102835
11.34_383.2042m/z	383.204	11.3373	pos	Isopentenyladenine-9-N-glucoside	HMDB0012240	62882			11675006	83087-94-9	Organic oxygen compounds	Organooxygen compounds	Carbohydrates and carbohydrate conjugates	*	45.7	33.4	M+NH4	C16H23N5O5	1.1439	2.98419	0.00276754	0.0165789	0.588643	1.50383	116032	77157.6	117631	94326.2	105908	163579	105015	112898	112867	56614.5	75278.9	88450.1	63944.9	105411	75520.2	74884
0.83_215.0796n	216.087	0.82825	pos	Succinylproline		339501		C11711	194156	63250-32-8	Unclassified	Unclassified	Unclassified	*	44.9	30.5	M+H-H2O, M+H	C9H13NO5	0.96604	2.92582	0.00532906	0.0235771	-3.95324	0.0645589	2792.47	43254.6	343.602	4548.46	556.568	180.841	296.573	2918.04	10703.2	98351.3	37044.8	18176.9	49398.9	6951.75	26418.4	66440.4
0.71_638.2137m/z	638.214	0.708033	pos	Morphine 3,6-diglucuronide		1360			11814263	64947-41-7	Unclassified	Unclassified	Unclassified	*	39.3	18.7	M+H	C29H35NO15	8.98535	2.92031	0.0365007	0.08246	0.869962	1.82762	91417.4	50020	160986	83891.8	73703.3	118630	30005.4	111003	61701.9	71049.2	53062.6	27421.3	63611.7	34263.1	32846.4	67886
1.25_283.0915n	282.084	1.24747	neg	Guanosine	HMDB0000133	87		C00387	6802	118-00-3	Nucleosides, nucleotides, and analogues	Purine nucleosides	Unclassified	***	66.4	95.6	M-H, 2M-H, M+FA-H	C10H13N5O5	-0.716794	2.91856	0.00177856	0.0132577	-1.25399	0.419286	25471.4	60749.5	16341	43615	17387.6	11724.1	21691.2	33208.2	34332.8	72507.2	48895	92099.5	38686.1	75964.4	39103.9	57990.2
11.36_205.0861m/z	205.086	11.3648	pos	Monoisobutyl phthalic acid	HMDB0002056	58086			92272	30833-53-5	Benzenoids	Benzene and substituted derivatives	Benzoic acids and derivatives	*	49.4	54.8	M+H-H2O	C12H14O4	0.770034	2.90097	0.00897798	0.0323199	0.71235	1.63847	102311	62442.8	99503.5	82019.8	91292.4	169226	96620.5	91146.3	86366.7	41313.4	59225	77401.7	49871.4	87056.7	58589	63642.5
1.08_437.0089m/z	437.009	1.07528	neg	beta-D-3-[5-Deoxy-5-(dimethylarsinyl)ribofuranosyloxy]-2-hydroxy-1-propanesulfonic acid	HMDB0032686	88625			131751282	77939-92-5	Organic oxygen compounds	Organooxygen compounds	Carbohydrates and carbohydrate conjugates	*	38.4	2.26	M+FA-H	C10H21AsO9S	-3.8695	2.89892	3.99065e-05	0.00147479	-1.96394	0.256327	10203.4	39806.3	3127.11	10343.6	9361.91	1336.56	8852.63	10394.3	28008	27718.5	36990.6	37872.3	35439	55947.4	38402.9	46273.6
7.79_198.1733n	199.181	7.78575	pos	Cycluron		72851		C19109	16554	2163-69-1	Unclassified	Unclassified	Unclassified	*	40.7	6.8	M+H, M+Na	C11H22N2O	0.581977	2.89068	0.000255896	0.00451949	-4.54159	0.0429384	1394.69	32481.3	1281.01	1221.94	1300.04	1903.8	1449.93	1307.32	1298.82	14723	13697.5	54100.4	44897.5	35981.4	43148.6	20820.5
12.85_577.4111n	578.418	12.8502	pos	PC(22:1(11Z)/0:0)		76576	LMGP01050134		52924057		Lipids and lipid-like molecules	Glycerophospholipids	Glycerophosphocholines	*	52.8	69.6	M+H, M+Na	C30H60NO7P	0.69522	2.88452	0.000310349	0.00505438	-2.1193	0.230159	9959.3	43271.4	6138.31	7624.03	4011.07	16000.7	5114.52	6316.4	24510.1	65875.6	40296.4	29646.3	38866.3	27560.6	35258.6	65396.1
10.68_454.3893m/z	454.389	10.6813	pos	3-Hydroxyeicosanoylcarnitine	HMDB0240767		LMFA07070040		71464572		Lipids and lipid-like molecules	Fatty Acyls	Fatty acid esters	*	41.2	11.1	M+H-H2O	C27H53NO5	0.450094	2.8823	0.0133494	0.0414976	1.37659	2.59654	70538.5	27166.3	81828	75933.9	59721.1	16521.2	145314	50293.9	64157.6	18536.1	22912	24521.5	32430.1	32337.9	30048.9	29377.7
12.53_395.2200m/z	395.22	12.5267	neg	1-pentadecanoyl-glycero-3-phosphate	HMDB0062324	82356	LMGP10050037		52929767		Lipids and lipid-like molecules	Glycerophospholipids	Glycerophosphates	*	38.5	0	M-H	C18H37O7P	-1.13391	2.87073	0.00102127	0.00976287	-1.02878	0.490125	32263.9	65828	48270.1	15550.3	22572.2	12928.2	33312.2	46852.2	46362.5	78164.7	57731.8	56225.5	86356.9	66925.7	46053.1	69338.6
1.96_239.1619m/z	239.162	1.95802	pos	11R-hydroxy-dodecanoic acid		35608	LMFA01050253		5312806		Lipids and lipid-like molecules	Fatty Acyls	Fatty Acids and Conjugates	*	39.6	2.99	M+Na	C12H24O3	0.491553	2.85442	0.0013709	0.0115116	0.703566	1.62853	87040.8	53447.6	87354.3	71750.4	78860.9	126248	82855.2	87993.5	74222.7	46200.6	49314	61498.5	43828.4	74143.3	44126.6	55021.6
6.37_199.1573n	222.147	6.3684	pos	11-nitro-1-undecene	HMDB0062669	353288			543829		Organic 1,3-dipolar compounds	Allyl-type 1,3-dipolar organic compounds	Organic nitro compounds	*	40.5	5.51	M+Na, M+K	C11H21NO2	0.441416	2.84668	0.00201807	0.0141021	0.668649	1.58958	92318.8	58077.4	88277.8	76755.7	83139.4	138497	90554.1	92192.4	76815.3	50341	57627	66474.1	53290.7	73566.9	49058.9	56183
0.73_721.0955m/z	721.095	0.730267	neg	Glucoputranjivin		328123		C08418	441524	18432-16-1	Unclassified	Unclassified	Unclassified	*	36.6	0	2M-H	C10H19NO9S2	3.46043	2.84627	0.00295169	0.0170812	1.06339	2.08983	61246.2	29306.8	75377.1	61782.4	77365.8	74564.4	26843.5	78106.1	34684.1	27528.8	41789.5	24128.2	26278	25903	23189.7	36330.1
1.29_385.0999m/z	385.1	1.28923	neg	3'-Ketolactose	HMDB0001030	58015		C05403	440659	15990-62-2	Organic oxygen compounds	Organooxygen compounds	Carbohydrates and carbohydrate conjugates	*	42.1	17.1	M+FA-H	C12H20O11	3.23957	2.83517	5.28398e-07	0.000141039	-2.31751	0.200614	6783.31	33812.8	3907.12	9776.64	5141.71	679.696	5910.07	6949.04	15118.9	31676.8	25253.7	37112.1	36772.1	33047	29675.7	43152.2
11.69_550.3149m/z	550.315	11.6866	neg	PC(17:2(9Z,12Z)/0:0)	HMDB0256157						Lipids and lipid-like molecules	Glycerophospholipids	Glycerophosphocholines	*	38.5	0	M+FA-H	C25H48NO7P	-0.192502	2.83128	0.0104615	0.0355017	0.760828	1.69446	85934.1	50714.7	99614.3	71717	89858	88538.4	86410	102016	63384.8	21072.4	93454.6	40504.7	26995.9	80930.1	36923.6	55121.2
3.78_156.0390m/z	156.039	3.78143	pos	N-(Carboxyaminomethyl)urea		66389		C06382	440998		Unclassified	Unclassified	Unclassified	*	37.4	0	M+Na	C3H7N3O3	7.46779	2.82414	0.00433426	0.0210476	0.476245	1.39112	127680	91782.4	132159	113047	114186	166613	125075	126913	115769	78605.1	91905.6	113118	74692	124985	78823.7	80347.9
0.69_104.1074m/z	104.107	0.69025	pos	Choline	HMDB0000097	56		C00114	305	62-49-7	Organic nitrogen compounds	Organonitrogen compounds	Quaternary ammonium salts	***	53.3	77.1	M+H	C5H13NO	4.368	2.82263	0.00785293	0.029695	0.489614	1.40407	139929	99659.5	130267	110741	133195	201352	112149	134034	157766	98358.3	93557.8	110314	104444	117376	84983.3	88583
1.49_247.1668m/z	247.167	1.48657	pos	Alepric acid		34858	LMFA01030191		5282854		Lipids and lipid-like molecules	Fatty Acyls	Fatty Acids and Conjugates	*	44	24.7	M+Na	C14H24O2	-0.407171	2.80788	0.00761919	0.0292102	0.749958	1.68174	90112.2	53582.6	83548.7	70111	69884.1	143656	88075	100510	75001.1	40516.2	54580.5	68530.5	39696.7	80032.4	44578	47144.1
11.92_447.2750m/z	447.275	11.9181	neg	Ximaosteroid B			LMST02030215				Lipids and lipid-like molecules	Steroids and steroid derivatives	Steroids	*	40.7	4.94	M+FA-H	C25H38O4	-0.545895	2.78068	0.0141944	0.0432909	-1.30172	0.405641	22943.3	56560.5	12735.6	22462.9	18028	4603.4	27808.7	16445.1	58519.2	93840.5	34602.4	43059.9	86718.8	42417.1	65797.2	29487.6
1.70_519.2909m/z	519.291	1.6968	pos	GS 1500		42540	LMST03020614		24779624		Lipids and lipid-like molecules	Steroids and steroid derivatives	Secosteroids	*	40.2	17.6	M+Na	C31H44O3S	1.06455	2.77958	0.000917788	0.00921275	1.67685	3.19729	45695.5	14291.9	39541.7	32336.9	73586.3	64969.3	49348.3	39395.5	20690.4	5662.6	17168.6	18931.7	13000.3	17004.5	16881.9	11393.8
13.00_270.2791m/z	270.279	13.0002	pos	cis-6,7-epoxy-9Z-heptadecene		98262	LMFA12000271		56936239		Lipids and lipid-like molecules	Fatty Acyls	Oxygenated hydrocarbons	*	46.9	36.6	M+NH4	C17H32O	0.00684012	2.7706	0.0453897	0.0958904	0.33998	1.26574	212190	167641	208980	177005	210280	298335	198302	212672	179759	152965	164431	196039	130692	228329	142263	158771
9.73_445.3195n	446.327	9.73252	pos	(5Z,8Z,11Z,14Z,17Z)-Icosa-5,8,11,14,17-pentaenoylcarnitine	HMDB0241609						Lipids and lipid-like molecules	Fatty Acyls	Fatty acid esters	*	41.3	13.6	M+H, M+Na	C27H43NO4	0.629378	2.7614	0.00285526	0.0168304	2.95685	7.76427	38484.6	4956.64	37578.8	24859.9	40199.8	24257.4	88892.9	35396.9	18206.8	1261.75	5831.38	6509.85	2892.75	8224.77	5911.19	4064.77
13.63_282.2556n	281.248	13.6262	neg	Elaidic acid	HMDB0000573	3406	LMFA01030073	C01712	637517	112-79-8	Lipids and lipid-like molecules	Fatty Acyls	Fatty acids and conjugates	**	57.8	0	M-H, M+FA-H	C18H34O2	-0.991702	2.75997	0.000830497	0.00862964	-1.52398	0.347725	17166.6	49368.2	21661.6	11417.6	13424.7	10228.6	12832.9	20025.3	30575.3	77980.2	57624.9	29205.7	48757.7	33621.9	35742.2	62645.1
10.94_634.3335m/z	634.334	10.942	neg	Pentasine	HMDB0029803	86510			131750910	108133-63-7	Organic acids and derivatives	Carboxylic acids and derivatives	Pentacarboxylic acids and derivatives	*	38.5	0	M-H2O-H	C30H49N6O10+	0.543019	2.74307	0.000124494	0.00297353	-1.2621	0.416938	18968.8	45495.5	9753.93	26164.2	15409.2	29325.1	24813.2	6949.76	20366.1	56225.1	37046.3	40376.1	59882.6	45770.7	43482.4	35685.3
13.01_849.5513n	848.544	13.0116	neg	PE(DiMe(11,5)/20:4(5Z,8Z,11Z,13E)-OH(15S))	HMDB0284770						Unclassified	Unclassified	Unclassified	*	36.8	0	M-H, M+FA-H	C47H80NO10P	-0.758236	2.69272	0.0119554	0.0385365	0.927057	1.90139	78512.9	41292.3	34292.9	82865.4	71400.1	107404	114786	86929.9	51911.6	18734.7	35116.2	44517.7	29740.3	72692.5	43305.6	44938.9
10.46_564.3303m/z	564.33	10.4641	neg	LysoPC(18:2(9Z,12Z)/0:0)	HMDB0010386	61696	LMGP01050035		11005824	22252-07-9	Lipids and lipid-like molecules	Glycerophospholipids	Glycerophosphocholines	***	71.9	98.7	M+FA-H	C26H50NO7P	-0.677771	2.68962	0.0326658	0.0764118	-2.36813	0.193696	9040.3	46672.6	214.049	23709.2	1539.13	23952.5	9415.23	289.574	4162.37	84562.1	23584.6	18703.2	103677	8858.84	75950.7	11372
13.44_841.5631n	859.601	13.4412	pos	PE-NMe2(22:5(7Z,10Z,13Z,16Z,19Z)/20:4(5Z,8Z,11Z,14Z))	HMDB0114565				131821672		Lipids and lipid-like molecules	Glycerophospholipids	Glycerophosphoethanolamines	*	36.2	0	M+H, M+NH4	C49H80NO8P	1.07828	2.68927	0.00118838	0.0105987	0.70439	1.62946	79594.2	48847.1	70544.9	63375.2	74672.9	113332	83489.4	80479.3	71266.2	57730.2	42448	56140.6	40365.2	64270.9	37840.5	43134.4
14.01_411.3258m/z	411.326	14.009	pos	epsilon-Tocopherol	HMDB0030554			C14154	9844470	490-23-3	Lipids and lipid-like molecules	Prenol lipids	Quinone and hydroquinone lipids	*	58	90.6	M+H	C28H42O2	0.125909	2.66737	0.0369737	0.0832326	-0.890086	0.539582	53317	98811.7	56011	62757.1	47461.2	32169.9	38637.3	68341.1	67841.2	178793	95670	56449.7	68779.8	44220	99160.7	148608
11.31_536.3713m/z	536.371	11.3062	pos	PC(19:1(9Z)/0:0)		76572	LMGP01050130		52924049		Lipids and lipid-like molecules	Glycerophospholipids	Glycerophosphocholines	*	50.4	58.3	M+H	C27H54NO7P	0.500284	2.66593	0.00436306	0.0211318	-1.89109	0.269604	12267.1	45500.3	7522.91	8787.55	7123.73	30476	6294.45	4215.41	21449.4	84598.4	51360.9	21103.7	47296.8	16105.2	40245.7	57791.1
0.71_119.0587n	120.066	0.708033	pos	L-Homoserine	HMDB0000719	5687		C00263	12647	672-15-1	Organic acids and derivatives	Carboxylic acids and derivatives	Amino acids, peptides, and analogues	***	58.6	79.1	M+H-H2O, M+H	C4H9NO3	3.96484	2.64622	0.00602147	0.0254121	-0.359224	0.779584	115967	148755	124682	117171	123106	110918	118349	111415	106126	185226	134663	126860	177327	117898	146370	152939
10.35_413.3507n	414.358	10.3458	pos	12-MethylHexadecanoylcarnitine	HMDB0240858						Lipids and lipid-like molecules	Fatty Acyls	Fatty acid esters	*	48.1	46.1	M+H, M+Na	C24H47NO4	0.463213	2.63801	0.0141139	0.0430974	1.24354	2.36778	58747.3	24811.1	78976.1	62667.6	72122.3	6860.49	99106.8	52393.1	39104.5	18450	36269.1	15615.4	31909.4	12013.4	31556.7	27863.7
3.71_282.1820n	283.189	3.71483	pos	Fumagillol	HMDB0252515				219089		Organic oxygen compounds	Organooxygen compounds	Alcohols and polyols	*	38.6	10.6	M+H, M+Na	C16H26O4	-4.05813	2.63024	0.000182093	0.00370228	-1.63627	0.321687	12558.6	39039.8	5185.3	24879.3	10601.9	4083.65	8114.96	16442.5	18602.5	45104.2	36146.8	42076.2	45256.4	18080.8	51003.9	35610.2
4.92_173.1174m/z	173.117	4.91752	pos	9-hydroxy-5Z-nonenoic acid		74606	LMFA01050232		5312793		Lipids and lipid-like molecules	Fatty Acyls	Fatty Acids and Conjugates	*	50.6	55.6	M+H	C9H16O3	0.837494	2.6269	0.00061111	0.00721956	0.665568	1.58619	74758.2	47130.6	74248.9	62351.5	65807.8	102676	72479.8	78567.4	67176.3	44267.4	44902.6	52668.1	42074.4	63203.4	37471.6	45326.5
10.29_426.3579m/z	426.358	10.2859	pos	Oleoylcarnitine	HMDB0005065				46907933	38677-66-6	Lipids and lipid-like molecules	Fatty Acyls	Fatty acid esters	***	60.3	43.6	M+H	C25H47NO4	0.332942	2.62497	0.0124412	0.0395271	1.53019	2.88825	54414.1	18839.9	54883.5	50036.4	49036.2	12314.9	118386	43957.7	52284.5	10205.7	19323.8	17234.3	18756	18905.6	25949.3	21504.3
14.73_207.0176m/z	207.018	14.7327	pos	5-Nitro-ortho-anisidine		73163		C19469	7447	99-59-2	Unclassified	Unclassified	Unclassified	*	38.1	0	M+K	C7H8N2O3	5.66671	2.61801	0.00861716	0.0314895	0.530436	1.44437	103703	71798.4	104076	71285.2	93636.7	141427	109319	111692	94486.2	66324.7	73841.3	86472.5	51287.6	97094.1	54934.6	72634.2
0.71_260.0298n	283.019	0.708033	pos	Fructose 6-phosphate	HMDB0000124	5159		C00085	69507	643-13-0	Organic oxygen compounds	Organooxygen compounds	Carbohydrates and carbohydrate conjugates	***	68	85.9	M+Na, M+K	C6H13O9P	0.268893	2.61707	0.0132739	0.0413835	-2.04491	0.242338	10136.6	41828.1	2896.46	16284.3	3887.24	3073.64	19441	6865.77	18507.5	24491.8	38989.1	77509.2	19717.8	84778.9	30215.2	17094.9
13.23_873.5398m/z	873.54	13.2349	pos	PG(P-20:0/22:6(4Z,7Z,10Z,13Z,16Z,19Z))		79997	LMGP04030093		52927433		Lipids and lipid-like molecules	Glycerophospholipids	Glycerophosphoglycerols	*	37.1	0	M+K	C48H83O9P	-0.951916	2.60861	0.00962766	0.0336714	0.988301	1.98385	62014.4	31259.7	73502.3	49030.4	70037.6	95545.5	55623	58225.7	32136.6	6522.15	27089.5	28796.2	17023.7	58883.4	39408.1	41094.7
13.49_331.2641m/z	331.264	13.488	neg	Adrenic acid	HMDB0002226	6560	LMFA01030178	C16527	5497181	28874-58-0	Lipids and lipid-like molecules	Fatty Acyls	Fatty acids and conjugates	***	61.2	34.8	M-H	C22H36O2	-0.506328	2.6035	0.00840164	0.0310494	-1.58137	0.334166	15813.6	47322.6	20047.9	10534.4	12459.5	3415.28	12766.3	18280.7	33191	46348	30447.4	29095.9	87083.9	31614.7	29241	77427.2
0.71_166.1347m/z	166.135	0.708033	pos	Nornicotine	HMDB0001126	64431		C06524	412	494-97-3	Organoheterocyclic compounds	Pyridines and derivatives	Pyrrolidinylpyridines	**	38.1	0	M+NH4	C9H12N2	5.8399	2.59751	0.00202595	0.0141182	0.439401	1.35604	106692	78678.9	109159	94053.1	97156.5	140056	95636.4	117584	93198.1	80346.6	79169.4	83997.1	76122.7	90914.8	67404.2	72797.8
0.73_229.0116m/z	229.012	0.730267	neg	D-Ribose 5-phosphate	HMDB0001548	159		C03736	440101	34980-65-9	Organic oxygen compounds	Organooxygen compounds	Carbohydrates and carbohydrate conjugates	***	68.5	53.4	M-H	C5H11O8P	-0.999087	2.59315	0.00929015	0.0329569	-0.938791	0.52167	33191.2	63625	19473.4	57084.1	21255.5	7326.39	21043.7	36072	70083.6	58510.1	66900.3	75902.8	44037.6	80929.5	53554.2	65540.5
1.16_118.0422n	136.076	1.15645	pos	Benzofuran	HMDB0032929	70116		C14512	9223	271-89-6	Organoheterocyclic compounds	Benzofurans	Unclassified	*	52.1	64.6	M+H, M+NH4	C8H6O	2.73967	2.58445	0.036167	0.082058	-0.491781	0.711147	87058.4	122420	92192.6	104045	96836.1	70332.1	88727.3	62918.3	94357.4	150913	97904	98928.4	185166	75461.7	123775	124791
4.28_245.1362m/z	245.136	4.2841	pos	Streptidine	HMDB0258506				201527		Organic oxygen compounds	Organooxygen compounds	Alcohols and polyols	*	42.2	14.9	M+H-H2O	C8H18N6O4	2.17122	2.56864	0.0110265	0.0366486	0.52874	1.44267	97575.8	67635.6	95103.6	98351.8	83973.7	137282	92525.3	98150.4	77643.5	50302.8	68422.9	89787.9	42131.1	83066.7	57703.4	82034.6
0.94_464.2461m/z	464.246	0.935783	pos	Leukotriene E3	HMDB0002355	58122	LMFA03020074		6440643	79494-05-6	Lipids and lipid-like molecules	Fatty Acyls	Eicosanoids	*	52.3	80.8	M+Na	C23H39NO5S	4.46763	2.5474	0.00111384	0.0102581	1.76295	3.3939	36317.4	10700.8	36835.6	24230.1	28257.7	67537.5	31295.2	41580.4	24485.5	4658.4	13915.4	12761.2	5833.67	18005.9	7362.44	12368.5
0.57_216.1475n	199.144	0.571967	pos	Valylvaline	HMDB0029140	86032			107475	3918-94-3	Organic acids and derivatives	Carboxylic acids and derivatives	Amino acids, peptides, and analogues	*	41.3	12.3	M+H-H2O, M+H	C10H20N2O3	0.689634	2.52615	0.0221081	0.0581751	0.604864	1.52084	97470	64089.8	73725.5	71946	74168.3	119732	107940	132494	102284	32176.7	79678	86951.7	38642.2	90666.1	61216	59297.8
9.23_334.2354m/z	334.235	9.2321	pos	N-tetradecanoyl-homoserine lactone		64716	LMFA08030038		58122267	202284-87-5	Lipids and lipid-like molecules	Fatty Acyls	Fatty amides	*	39	0	M+Na	C18H33NO3	0.482421	2.52325	0.00414165	0.020492	0.511738	1.42577	93791.2	65783	95061.8	78323	82416.5	127427	92129.8	97447.8	83732.6	52860.6	66673.2	73712.5	54207.5	90138.9	57656.7	65231.5
10.91_235.1694m/z	235.169	10.9146	pos	Petasalbin	HMDB0035639	90907			495921	4176-11-8	Lipids and lipid-like molecules	Prenol lipids	Sesquiterpenoids	*	45.1	33.8	M+H	C15H22O2	0.435299	2.49325	0.00103408	0.00984716	0.73575	1.66526	64087.4	38484.9	65256.9	58229.1	52868.8	84148	61627.7	67085.2	59396.1	27130.4	39695.5	45605.1	26724.4	60990.3	38689.7	30558.7
14.46_351.2209m/z	351.221	14.4604	neg	13,14-Dihydro-15-keto-PGE2	HMDB0002776	2311	LMFA03010031	C04671	5280711	363-23-5	Lipids and lipid-like molecules	Fatty Acyls	Eicosanoids	*	49.9	67.4	M-H	C20H32O5	9.04496	2.49311	0.0172454	0.0492127	5.72954	53.0596	36825.5	694.041	38755.2	26319.7	31193.2	466.409	18447.3	32535.7	110061	474.036	2577.5	2.41397e-06	180.764	2.41397e-06	962.985	663.001
0.69_132.0537n	133.061	0.69025	pos	L-Asparagine	HMDB0000168	14		C00152	6267	70-47-3	Organic acids and derivatives	Carboxylic acids and derivatives	Amino acids, peptides, and analogues	***	58.4	86.3	M+H, M+Na	C4H8N2O3	1.2166	2.48213	0.000877802	0.00896098	-0.770279	0.586304	34139.2	58227.8	31439	38479.3	41050	20725.2	43388.2	32111.9	31780.7	79817.9	45601	55150.7	70232.4	49384.7	50861	56546.7
11.43_228.2324m/z	228.232	11.4309	pos	Xestoaminol A			LMSP01080078		14756402		Lipids and lipid-like molecules	Sphingolipids	Sphingoid bases	*	42.7	17.9	M+H	C14H29NO	0.700109	2.47647	0.00294235	0.017062	0.537687	1.45164	84019.7	57879	82029.2	67839.9	72023.1	111439	91412.3	91181.1	72213.3	45425	58632.1	65864.4	50176.1	75160	48792.1	61103.3
0.75_138.0551m/z	138.055	0.745533	pos	Trigonelline	HMDB0000875	273		C01004	5570	535-83-1	Alkaloids and derivatives	Unclassified	Unclassified	**	52.6	25.4	M+H	C7H7NO2	0.78336	2.47204	0.000210837	0.00400114	0.952916	1.93578	51646.7	26680	48610.4	57375.9	51703.3	36507.5	42578.2	52403.9	72347.4	27075.5	27896.8	24888	35415.6	17212.2	25925.4	28346.6
10.13_460.2695m/z	460.27	10.1273	pos	[(2S,4R,5R,6R,14S,16R)-14-Hydroxy-7,11-dimethyl-6-(2-oxopyran-4-yl)-3-oxapentacyclo[8.8.0.02,4.02,7.011,16]octadecan-5-yl] acetate	HMDB0247800				78168774		Lipids and lipid-like molecules	Steroids and steroid derivatives	Steroid esters	*	53.9	71.6	M+NH4	C26H34O6	0.366168	2.42207	0.00132862	0.0113059	0.972771	1.96261	50536.6	25749.7	43961.5	31040.3	41243.5	78828.7	58571.3	46638.4	53472.5	21754.6	25963.4	24283	22603.1	31178	23206.6	31259.5
12.71_371.2201m/z	371.22	12.7102	neg	12alpha-Methylpregna-4,9(11)-diene-3,20-dione		70679		C15190	248790		Unclassified	Unclassified	Unclassified	*	37.3	0	M+FA-H	C22H30O2	-8.36957	2.39555	0.00263465	0.0161241	-0.825626	0.564237	32763.2	58066.4	39965.5	18550.1	28966.1	17231.4	43914.6	38716.2	41998.6	56685.3	68256.9	42806.7	73993.4	56492.2	38245.6	69984.4
0.63_130.0825n	148.116	0.628083	pos	3-Methylcyclohexanethiol	HMDB0031537	87746			21259899	38699-50-2	Organosulfur compounds	Thiols	Alkylthiols	*	36	0	M+H, M+NH4	C7H14S	6.95557	2.37399	3.63028e-06	0.000392398	0.953708	1.93684	43432.1	22424.2	41511.6	44499	45559.8	42567.5	48376.8	38833.8	42676	24671	18341.3	24427.2	34487.5	18720.4	20403.3	15918.4
6.31_329.2567n	352.246	6.30668	pos	4,8 Dimethylnonanoyl carnitine	HMDB0006202	58362	LMFA07070046		53477801		Lipids and lipid-like molecules	Fatty Acyls	Fatty acid esters	*	39.3	0	M+Na, M+K, M+H-H2O	C18H35NO4	0.280923	2.35107	0.0016312	0.0126825	0.61798	1.53472	66308.1	43205.2	60680.9	57112.2	55196.4	95522.7	65069.2	71661.6	58913.4	39230.8	40752.2	50245	38310.7	52404.6	39901	41592
1.29_547.0903m/z	547.09	1.28923	neg	Dotmp	HMDB0247657				124761		Organic acids and derivatives	Organic phosphonic acids and derivatives	Organic phosphonic acids	*	38.8	0	M-H	C12H32N4O12P4	1.51806	2.347	0.000230068	0.00421373	-1.5698	0.336855	10516	31218.3	6922.79	15915.2	10826.8	1054.94	9591.86	10421.8	18878.7	14550.2	29725.9	43685.6	32570.1	31618.5	36627.1	29750.7
12.21_449.2907m/z	449.291	12.2086	neg	Androstane-3,17-diol dipropionate	HMDB0249623				4556532		Lipids and lipid-like molecules	Steroids and steroid derivatives	Steroid esters	*	40.8	5.65	M+FA-H	C25H40O4	-0.419506	2.34658	0.0105161	0.0355899	-1.19823	0.43581	18737.4	42994.3	12748	19994.6	11551.8	2934.58	19434.3	13898.6	50599.7	54222.8	29785.6	25798.9	63312.5	28851.5	53014.1	45974.6
0.75_215.0327m/z	215.033	0.7523	neg	2-C-methyl-D-erythritol-4-phosphate	HMDB0304061	330202		C11434	443198		Organic acids and derivatives	Organic phosphoric acids and derivatives	Phosphate esters	*	40.2	3.22	M-H	C5H13O7P	0.575851	2.34491	2.52806e-05	0.001139	-0.840096	0.558607	23838.3	42674.5	21657.9	28453.1	23683.5	14564.7	23501.5	21768.9	33238.3	42207.3	45567.7	40931.7	43389.2	50900.8	40194.1	35530.7
6.91_144.1384m/z	144.138	6.90787	pos	Octanamide	HMDB0255903	340340			69414		Lipids and lipid-like molecules	Fatty Acyls	Fatty amides	*	45.4	30.6	M+H	C8H17NO	1.01035	2.33443	0.0044156	0.0212798	0.521484	1.43543	79498	55382.7	77084.7	67819	65498.8	110430	79999.6	82936.4	72717.5	44603.5	57409.3	61899.6	45420.7	73809.4	48758.6	55777.8
13.74_122.0967m/z	122.097	13.7376	pos	5-Ethyl-2-methylpyridine	HMDB0029729	86450			7728	104-90-5	Organoheterocyclic compounds	Pyridines and derivatives	Methylpyridines	*	42.9	18.4	M+H	C8H11N	2.04939	2.31642	0.0262415	0.0656733	0.342861	1.26827	137728	108595	131378	126397	124379	189223	134362	140236	118121	94232.1	106468	131112	96940.2	139754	94916.3	96744.6
10.93_479.3016n	480.309	10.9286	pos	LysoPE(18:1(11Z)/0:0)	HMDB0011505	62291	LMGP02050064		53480949		Lipids and lipid-like molecules	Glycerophospholipids	Glycerophosphoethanolamines	***	58.7	51.7	M+H, M+Na	C23H46NO7P	0.844456	2.30906	0.0121474	0.0389341	-0.855037	0.552851	27992.5	50633.1	17317.5	31189.9	17531.7	35546.3	31659.7	13845.8	48856.9	78317.1	33632.4	38908.4	57826.2	61592.8	45497.1	38657.5
10.73_193.1589m/z	193.159	10.7316	pos	Pseudoionone	HMDB0032498	88498			1757003	3548-78-5	Lipids and lipid-like molecules	Prenol lipids	Monoterpenoids	*	52.6	66.8	M+H	C13H20O	1.03859	2.30454	0.000603792	0.00715198	0.806486	1.74895	48083.2	27492.7	50037.2	39373.7	42961.9	65509.7	48167.8	52365.6	38166.8	20708.7	29935.2	33775.2	19608.6	39299.1	23424.4	25697.7
0.73_242.0192n	260.053	0.72705	pos	(6S,7R)-2,6,7,8-Tetrahydroxy-2-oxo-1,3,2lambda5-dioxaphosphonan-5-one	HMDB0260167						Organic acids and derivatives	Organic phosphoric acids and derivatives	Unclassified	*	39.1	0	M+H-H2O, M+H, M+NH4	C6H11O8P	0.236947	2.28027	2.82492e-05	0.00122526	-1.04392	0.485006	17457.6	35994.7	16591.2	20609.1	21320.4	11376.4	12866.1	18507	20933.4	38016.7	36807.1	43144.7	28456.2	44387.7	30784.1	30365.9
0.71_408.0903m/z	408.09	0.708033	pos	(S)-2,3-Dihydro-3,5-dihydroxy-2-oxo-3-indoleacetic acid 5-glucoside	HMDB0034674	90128			131751604	218604-37-6	Lipids and lipid-like molecules	Prenol lipids	Monoterpenoids	*	38.9	5.31	M+Na	C16H19NO10	0.380804	2.2743	0.0039318	0.0198825	-3.29677	0.101759	2487.6	24446	2.41397e-06	4669.02	2.41397e-06	2.41397e-06	6654.7	2976.88	3112.62	11284.2	23324	43795.2	15361.3	49220.3	21033.1	7103.97
0.81_160.1333m/z	160.133	0.8082	pos	Methacholine	HMDB0015654	316603		C07471	1993	55-92-5	Organic nitrogen compounds	Organonitrogen compounds	Quaternary ammonium salts	*	49.5	50.3	M+H	C8H17NO2	0.818317	2.26846	0.0167633	0.0483116	-1.27096	0.414383	17558	42371.4	10237.5	20163.8	15260.6	4266.46	18360.7	17497.5	37119.4	78267.2	23333.4	19489.3	53971.2	28359.3	36889.2	56290.1
13.45_355.1580m/z	355.158	13.4456	neg	Hydroxyzine	HMDB0014697	4069		C07045	3658	68-88-2	Benzenoids	Benzene and substituted derivatives	Diphenylmethanes	*	42.6	38.6	M-H2O-H	C21H27ClN2O2	-0.779156	2.26587	0.0291257	0.0703959	-1.09121	0.469367	27038.5	57606.2	52645.6	22504.3	17524.5	11223.2	9387.78	25613.9	50370.2	104310	77130.9	31393.7	56653	24903.4	44888.5	63963.5
1.11_228.1476n	229.155	1.11178	pos	Pro-Ile	HMDB0304810						Organic acids and derivatives	Carboxylic acids and derivatives	Amino acids, peptides, and analogues	*	44.1	24.7	M+H, M+NH4	C11H20N2O3	0.740583	2.26278	0.0188603	0.0523061	-1.01462	0.494958	27523.9	55608.6	36045.6	29201.3	22649.4	14795.5	11916.1	47892.4	30167	75778.9	67444.7	80141.7	63057.7	17015.3	59627.4	26194.7
0.57_259.2494m/z	259.249	0.571967	pos	Decanoylcholine	HMDB0013228	85239	LMFA07010826		9974373		Organic nitrogen compounds	Organonitrogen compounds	Quaternary ammonium salts	*	38.2	6.42	M+H	C15H32NO2+	-4.56604	2.25104	0.000350904	0.00533888	-1.50777	0.351654	11828.1	33635.7	16733.3	14303.1	12698.3	12443.5	3890.07	15436.6	7291.99	44862.9	36277.4	25123.2	25261	19793	48630.7	35501.7
13.36_156.1384m/z	156.138	13.3614	pos	4E,8-Nonadienal		46426	LMFA06000135		44256564		Lipids and lipid-like molecules	Fatty Acyls	Fatty aldehydes	*	43.3	19	M+NH4	C9H14O	0.779997	2.23113	0.0140432	0.0429725	0.481198	1.3959	87965.5	63017	81733.7	73734.8	84398	126362	86036.4	90045.7	73448	55911.1	63456.9	76079.9	49534.9	88337.8	51434.1	56364.1
8.89_311.1863m/z	311.186	8.89208	neg	Tetranor 12-HETE	HMDB0060055	44857			15730832	121842-79-3	Lipids and lipid-like molecules	Fatty Acyls	Fatty acids and conjugates	*	55.9	82	M+FA-H	C16H26O3	-0.251294	2.22915	0.00625342	0.0259051	-1.86329	0.274848	8505.81	30947.3	10856.9	8583.74	4158.37	956.386	3930.07	11541.1	19514.1	58731.8	17173	15067.9	45646.1	18471.2	23182.5	38358.5
0.83_235.1059n	258.095	0.82825	pos	(2R,3R,4R,5R)-2-Amino-4,5,6-trihydroxy-3-[(2R)-1-oxopropan-2-yl]oxyhexanal	HMDB0255309						Organic oxygen compounds	Organooxygen compounds	Carbohydrates and carbohydrate conjugates	*	48.9	51.1	M+Na, M+K, M+H-H2O	C9H17NO6	1.39463	2.21669	1.82103e-06	0.00026682	1.63664	3.1094	24915.3	8012.89	27211.5	27235.6	17847.6	19570.6	32558.6	25755.5	24227.6	8186.4	10288.9	6132.5	8970.12	6152.32	7473.45	8886.5
14.14_120.1022m/z	120.102	14.1369	pos	3-Hydroxy-3-methylbutan-2-one		98110	LMFA12000066		8261		Lipids and lipid-like molecules	Fatty Acyls	Oxygenated hydrocarbons	*	42.7	19.7	M+NH4	C5H10O2	2.57002	2.21492	0.00240712	0.0153682	0.687445	1.61043	55580.6	34512.9	52869	45248.6	51470	80408.6	58320.9	56265.8	44481.5	29121.6	33223.4	42475.5	26816.1	48912.5	29687.7	31353.8
9.68_472.1373n	495.126	9.68095	pos	Formononetin 7-O-(6''-acetylglucoside)			LMPK12050023		102463148		Lipids and lipid-like molecules	Polyketides	Flavonoids	*	40.2	5.97	M+H, M+NH4, M+Na	C24H24O10	0.845666	2.21139	0.00509318	0.0230782	0.625344	1.54258	62110.2	40263.9	58002.8	52197.6	58858.7	89973.7	63931.9	66086.8	45720.1	34024	40110.1	44204.1	30848.6	59160.2	36203.8	37296.5
13.15_772.5126m/z	772.513	13.1483	neg	PC(14:0/18:3(9Z,12Z,15Z))	HMDB0007876	59326	LMGP01010497	C00157	24778625		Lipids and lipid-like molecules	Glycerophospholipids	Glycerophosphocholines	*	38	0	M+FA-H	C40H74NO8P	-1.09279	2.2062	0.0049401	0.0226673	1.3787	2.60034	34276.3	13181.4	56699.1	46156.3	32110.8	40112.3	14234.5	29066.9	21554.1	10085.4	8783.84	14991	7347.35	28554.8	11828.6	10679.1
11.19_592.3618m/z	592.362	11.1883	neg	LysoPC(20:2(11Z,14Z)/0:0)	HMDB0010392	61702	LMGP01050132	C04230	52924053		Lipids and lipid-like molecules	Glycerophospholipids	Glycerophosphocholines	***	71.6	99.2	M+FA-H	C28H54NO7P	-0.374123	2.19576	0.0021392	0.0145265	-1.49627	0.354469	11486.9	32406	7182.9	10892.7	8323.96	19867.6	11623.1	5479.17	17039	56306.8	39413.3	15841.9	32825.7	21053.9	27746.1	33654.2
1.16_200.9725m/z	200.973	1.15645	pos	N-Nitrosothiazolidine-4-carboxylic acid	HMDB0040192	94727			104890	86594-16-3	Organic acids and derivatives	Carboxylic acids and derivatives	Amino acids, peptides, and analogues	*	40.6	13.6	M+K	C4H6N2O3S	-3.39916	2.16911	0.0306546	0.0730882	0.412645	1.33112	103238	77556.9	102604	86191.3	88575.2	151642	98223.8	106584	88844.1	68966.7	76438	92993.3	64542.2	105896	63958	70103.8
11.92_402.2772n	403.284	11.9237	pos	MG(0:0/22:6(4Z,7Z,10Z,13Z,16Z,19Z)/0:0)	HMDB0011557	62340	LMGL01010027		46896303		Lipids and lipid-like molecules	Glycerolipids	Monoradylglycerols	*	52.5	68	M+H, M+Na, M+H-H2O	C25H38O4	0.357533	2.1611	0.0197984	0.0540395	-1.17515	0.442838	16661.3	37624	9726.93	15624.1	11378.4	4617.52	16410.3	13016.4	45855.5	57559.7	21921.7	27002.5	54347.5	29774.9	49950.9	22810.5
10.66_336.2511m/z	336.251	10.6604	pos	N-Lauroyl Leucine	HMDB0242035						Unclassified	Unclassified	Unclassified	*	45	32.2	M+Na	C18H35NO3	0.704714	2.14996	0.00142995	0.0117385	0.590722	1.506	56191.6	37311.8	58858.1	49142.6	49694.5	73165.2	52794.2	61387.3	48299.2	27491.5	37347.9	44915.9	32126.3	51087.1	32670.1	35543.9
4.39_129.0557m/z	129.056	4.38995	neg	Ketoleucine	HMDB0000695	5663		C00233	70	816-66-0	Organic acids and derivatives	Keto acids and derivatives	Short-chain keto acids and derivatives	***	63.9	94.7	M-H	C6H10O3	-0.343794	2.14052	0.0276996	0.0679858	-1.36172	0.389119	15421.8	39632.6	10582.6	23388.1	7943.31	4952.18	11718.9	17346.2	32021.3	90661.5	26391.6	28833.7	39250.7	21179.1	28121.5	42990
9.51_491.2300m/z	491.23	9.50793	pos	Mozambioside	HMDB0037002	91985			73822377	70717-95-2	Organoheterocyclic compounds	Naphthofurans	Unclassified	*	38.3	5.89	M+H-H2O	C26H36O10	4.88902	2.13871	2.05217e-05	0.00100793	-32.6219	1.51301e-10	2.41397e-06	15954.8	2.41397e-06	2.41397e-06	2.41397e-06	2.41397e-06	2.41397e-06	2.41397e-06	2.41397e-06	7239.08	13695.9	21028.2	19282.3	23745.9	17964.4	8727.81
11.35_298.2742m/z	298.274	11.3511	pos	17-Octadecynoic acid	HMDB0244776	35229	LMFA01030575		1449	34450-18-5	Lipids and lipid-like molecules	Fatty Acyls	Fatty acids and conjugates	*	53.6	73.1	M+NH4	C18H32O2	0.569132	2.13834	0.0412769	0.0896971	1.02465	2.03447	44789.9	22015.5	69904.5	25416.5	30896.8	38191.1	27659.3	92702.6	28758.4	17083.3	22118.4	27067.7	18635.7	26483.1	21608	21112.5
14.30_102.0918m/z	102.092	14.2962	pos	N-butylformamide	HMDB0062600				13376	871-71-6	Organic acids and derivatives	Carboxylic acids and derivatives	Carboxylic acid derivatives	*	47.6	43.9	M+H	C5H11NO	4.36557	2.12395	0.0111695	0.0369754	0.425312	1.34286	86168.9	64168.1	86804.6	72979.4	79113.5	115815	86644.7	88431.3	73394.1	51947	56841.3	76010.7	56036.1	87643.3	58751	61947.2
10.21_205.1589m/z	205.159	10.2089	pos	Isokobusone	HMDB0036791	44491		C16977	3860435	24173-72-6	Organic oxygen compounds	Organooxygen compounds	Alcohols and polyols	*	39	0	M+H-H2O	C14H22O2	0.878192	2.10682	0.00122897	0.0108104	0.697972	1.62222	46791.4	28844	47650.1	38896.9	42077.2	63398.4	46131.6	50470.2	38915.2	21306.8	30139.5	35319.5	21482.1	41320.7	24625.5	27713.8
9.82_398.3268m/z	398.327	9.82408	pos	3-hydroxyhexadecanoyl carnitine	HMDB0061642				71464553		Lipids and lipid-like molecules	Fatty Acyls	Fatty acid esters	***	46.1	36	M+H-H2O	C23H45NO5	0.655286	2.10111	0.00076229	0.0082045	2.28367	4.86917	22943.1	4711.92	16758.5	15133.6	22320.5	12339.9	42348.7	31380.2	20320.5	1007.23	5715.25	7110.99	2415.96	6625.98	5925.53	4182.51
14.05_284.2947m/z	284.295	14.0485	pos	Enigmol		53958	LMSP01080058		11415391		Lipids and lipid-like molecules	Sphingolipids	Sphingoid bases	*	51.2	61.5	M+H-H2O	C18H39NO2	-0.159999	2.09813	0.00469732	0.0220049	0.513417	1.42743	68322.1	47863.8	65782.3	51366.7	60223.5	91729.3	65960.9	64837.3	78354.7	41401.1	49989.6	54351.5	36402.8	61639.5	42377.6	48884.6
1.00_136.0619m/z	136.062	1.0017	pos	Adenine	HMDB0000034	85		C00147	190	73-24-5	Organoheterocyclic compounds	Imidazopyrimidines	Purines and purine derivatives	**	42.2	15.8	M+H	C5H5N5	0.613158	2.09478	0.000112788	0.00281731	1.22811	2.34259	28984.7	12372.9	29891.6	27912.3	26549.3	31980.4	33283.7	30297	22978.6	4162.26	14679.8	18407.4	7379.74	23181.7	12964.2	5835.31
5.25_239.0890m/z	239.089	5.25218	pos	Isoketocamphoric acid	HMDB0301824						Lipids and lipid-like molecules	Fatty Acyls	Fatty acids and conjugates	*	39.2	0.49	M+Na	C10H16O5	0.158339	2.08868	0.00690217	0.0274325	0.552657	1.46678	62584.5	42667.8	62407.7	55807.1	48240.3	94378.1	62717.4	61603.1	52937.7	38966.5	42892.7	43156.6	37583.6	55488.2	39537.6	41049.4
10.34_526.3145m/z	526.315	10.3379	neg	LysoPC(15:0/0:0)	HMDB0010381	61691	LMGP01050016	C04230	24779458		Lipids and lipid-like molecules	Glycerophospholipids	Glycerophosphocholines	***	68.4	94.9	M+FA-H	C23H48NO7P	-1.10985	2.08225	0.000254812	0.00451949	-1.79355	0.288461	6432.82	22300.5	1090.1	8971.21	6567.26	13909.2	8274.68	1188.6	5028.63	23072.3	17730.2	16964.8	36811.1	20037.1	22950.2	18537.8
12.74_677.4635n	678.471	12.7422	pos	1-(2-methoxy-7Z,21Z-octacosadienyl)-sn-glycero-3-phosphoserine			LMGP03060032		137323968		Lipids and lipid-like molecules	Glycerophospholipids	Glycerophosphoserines	*	37.4	0	M+H, M+Na	C35H68NO9P	0.547447	2.07376	2.01954e-05	0.00100036	-0.77455	0.584571	22148.4	37888.3	27218.9	22682.5	27757.4	16117.2	13409.6	24233.8	23619.3	41159	35044	35161.6	41209.5	34741.2	39868.6	38034.1
1.11_612.1525n	613.16	1.11178	pos	Oxidized glutathione	HMDB0003337	322837		C00127	65359	27025-41-8	Organic acids and derivatives	Carboxylic acids and derivatives	Amino acids, peptides, and analogues	***	59.7	98.3	M+H, M+Na	C20H32N6O12S2	0.80524	2.06749	0.0394645	0.0869257	2.42718	5.37843	28782.5	5351.47	20018.1	13903.4	32305.8	82791.8	35101.9	14002.8	3353.45	390.837	16362.9	4372.33	2.41397e-06	7307.86	2603.4	6422.92
10.71_452.2780m/z	452.278	10.7082	neg	LysoPE(16:0/0:0)	HMDB0011503	40776	LMGP02050002		9547069	53862-35-4	Lipids and lipid-like molecules	Glycerophospholipids	Glycerophosphoethanolamines	***	69.7	93.3	M-H	C21H44NO7P	-0.504245	2.06171	0.0406019	0.0886248	-0.871669	0.546514	23600.5	43183.8	16217.1	27292.8	22865.6	14203.7	33216.9	14740.1	36667.5	57691.3	21660.2	36125.8	78030.5	53287.5	32445.9	23045.1
12.86_280.2400n	279.233	12.8598	neg	11Z,14Z-octadecadienoic acid		34963	LMFA01030299		5312450		Lipids and lipid-like molecules	Fatty Acyls	Fatty Acids and Conjugates	*	40.6	6.65	M-H, M+FA-H	C18H32O2	-0.885933	2.0573	0.0157804	0.04636	-1.86711	0.274122	8325.41	30371.2	7786.51	4827.26	4313.45	2745.37	3435.14	19803.4	15366.8	65742.7	37826.2	14584.4	41002.4	8039.54	18412.2	26990.9
13.44_817.5590n	818.569	13.4412	pos	PC(22:6(4Z,7Z,10Z,13Z,16Z,19Z)/17:1(9Z))		76385	LMGP01012105		52923687		Lipids and lipid-like molecules	Glycerophospholipids	Glycerophosphocholines	*	36.7	0	M+H-H2O, M+H	C47H80NO8P	-3.90074	2.03697	0.0122837	0.0392772	0.360552	1.28392	92700.8	72201.5	106548	87088	85904	108414	85856.8	90058.3	85036	72528	53716.5	65055.2	63110.3	101805	69895.8	79299.3
12.22_278.2243n	277.217	12.2189	neg	alpha-Linolenic acid	HMDB0001388	6208	LMFA01030152	C06427	5280934	463-40-1	Lipids and lipid-like molecules	Fatty Acyls	Lineolic acids and derivatives	***	57.9	30.4	M-H, M+FA-H	C18H30O2	-0.843417	2.03641	0.00577127	0.0247594	-1.80793	0.285601	7855.09	27503.7	8575.55	5098.22	6204.47	3712.65	4934.99	12539.7	13920.1	55452.2	29741	12125.4	31369.3	12877.8	18801.5	32158.7
12.59_811.4979n	812.505	12.5869	pos	PE(PGD2/18:2(9Z,12Z))	HMDB0261429						Unclassified	Unclassified	Unclassified	*	43.8	34.9	M+H, M+Na	C43H74NO11P	-2.57817	2.03379	0.00975063	0.0339351	-1.5548	0.340376	10135.6	29777.5	10711.2	8535.5	7297.51	3931.03	3721.11	11372.1	25380.6	59112.3	18144.5	18832.7	30538.1	14093.1	34656.1	33065.9
0.71_610.2192m/z	610.219	0.708033	pos	N-Acetyl-D-glucosaminyldiphosphodolichol	HMDB0001445	6251		C04500	11953837		Organic oxygen compounds	Organooxygen compounds	Carbohydrates and carbohydrate conjugates	*	36.2	0	M+Na	C23H43NO12P2	6.66085	2.02367	0.0238285	0.0613246	1.11234	2.16196	39234.7	18147.7	59753.2	46266	25166.4	35165.5	6610.69	44622.1	57059	22803	17098.1	6758.79	31268.9	6167.62	11313.5	31624.1
0.61_188.1759m/z	188.176	0.609217	pos	N8-Acetylspermidine	HMDB0002189	6535		C01029	123689	13431-24-8	Organic acids and derivatives	Carboximidic acids and derivatives	Carboximidic acids	**	42.5	0	M+H	C9H21N3O	0.886344	2.01841	0.0359325	0.0817804	-0.677527	0.625236	44308.8	70867.3	51320.8	35248.9	35428.3	38149.5	50457.4	41588.8	57968	75514.8	66088.2	42801.7	37326.9	64250.2	89328.6	120761
4.85_168.9893m/z	168.989	4.85112	neg	1,1,1,2,3,3,3-Heptafluoropropane	HMDB0244037				67940		Organohalogen compounds	Organofluorides	Unclassified	*	39.7	0	M-H	C3HF7	-0.430342	2.01668	3.66832e-06	0.000392398	0.852476	1.8056	31615.8	17509.9	33345.3	30404.8	31940.7	31180.8	34459.3	33694.8	26285	12726.3	17023.3	19417.6	14559.5	24485.4	17050.6	17306.4
0.69_107.9980n	126.032	0.69025	pos	Vinylphosphonic acid	HMDB0259829						Organic acids and derivatives	Organic phosphonic acids and derivatives	Organic phosphonic acids	*	39.9	10.9	M+H, M+NH4	C2H5O3P	3.71313	2.01627	0.000577625	0.00696506	1.37837	2.59975	27492.8	10575.2	28283.2	29453.5	36820.6	25076.3	38830.4	16925.1	17060.5	5679.21	8077.8	12577.2	9326.07	19231.9	10284.2	8849.73
14.41_108.0812m/z	108.081	14.4063	pos	6-Acetyl-1,2,3,4-tetrahydropyridine	HMDB0030345	86905			520300	27300-27-2	Organoheterocyclic compounds	Pyridines and derivatives	Hydropyridines	*	46.1	35.6	M+H-H2O	C7H11NO	3.12699	2.01197	0.0202369	0.0549269	0.327567	1.25489	105635	84178.4	99179.4	104674	93969.3	140471	102758	107716	90677.8	76951.6	82622.7	100604	76898.8	105551	74726.7	71894
1.31_206.9886m/z	206.989	1.31205	neg	Hexafluoroacetylacetone	HMDB0253132	343580			73706		Organic oxygen compounds	Organooxygen compounds	Carbonyl compounds	*	49.5	48.5	M-H	C5H2F6O2	-0.221549	2.00596	0.00388188	0.0197561	0.754957	1.68758	43395	25714.3	45203.8	34334.4	52212.1	51988	49791.2	42783	27452.9	13475.9	30548.3	31289.7	19659.8	40251.6	25981.8	18793.3
14.12_760.5133m/z	760.513	14.1164	pos	PG(16:1(9Z)/18:3(9Z,12Z,15Z))	HMDB0010592	61867	LMGP04010213		52926478		Lipids and lipid-like molecules	Glycerophospholipids	Glycerophosphoglycerols	*	37.8	0	M+NH4	C40H71O10P	1.28275	1.99189	0.0455074	0.0960962	-0.866047	0.548648	26238.7	47824.3	43568.1	27309.5	22432	3760.98	11041	27133.1	48426.1	89149.3	29390	41574.7	52900.1	49312.3	37128.9	35314.5
0.83_162.0762m/z	162.076	0.82825	pos	Glucosamine	HMDB0001514	63216		C00329	439213	3416-24-8	Organic oxygen compounds	Organooxygen compounds	Carbohydrates and carbohydrate conjugates	***	55.5	80.9	M+H-H2O	C6H13NO5	0.772684	1.9908	0.000208217	0.00396797	0.69137	1.61482	40728.5	25221.7	45835.3	43092.8	45156.7	31043.3	36986.4	44545.2	38439.6	16758.1	23548.3	32142.8	26534.7	32367.3	22251.2	22949.7
0.65_212.0676n	235.057	0.648267	pos	Propyl gallate	HMDB0033835	68880		C11155	4947	121-79-9	Benzenoids	Benzene and substituted derivatives	Benzoic acids and derivatives	*	37.7	1.15	M+Na, M+K	C10H12O5	-4.08346	1.99064	0.00514349	0.0232276	0.505553	1.41967	61534.8	43344.5	72406.2	51305.8	72830	59358.2	76109.8	53938.3	44795.3	53840.1	35691.6	44229.6	48514.5	44318.7	33850.3	42966.8
5.48_162.1257n	163.133	5.47727	pos	1-O-Pentylglycerol	HMDB0243976				90819		Lipids and lipid-like molecules	Glycerolipids	Monoradylglycerols	*	41.1	6.68	M+H, M+K, M+NH4	C8H18O3	0.351987	1.98009	0.00722736	0.0281859	0.461801	1.37726	65937.1	47875.6	65665.4	57655.4	57464.2	93332.8	64690.2	65378.3	57373.5	41976.2	45992.3	55784.7	39753.5	60836.5	44949	45836.8
2.85_179.0349m/z	179.035	2.85367	neg	3-(3,4-Dihydroxyphenyl)lactic acid	HMDB0003503	6942		C01207	439435	23028-17-3	Phenylpropanoids and polyketides	Phenylpropanoic acids	Unclassified	**	40.7	0	M-H2O-H	C9H10O5	-0.211655	1.9792	0.00270596	0.0164184	-2.12007	0.230036	5162.08	22440.3	3187	8294.01	3135.49	1251.7	5401.92	6319.16	8545.25	40342.2	13818.9	17779.2	28589.7	6100.62	18061	32390.5
12.85_625.2660m/z	625.266	12.8502	pos	Kanokoside D		71687		C17431	46173908		Unclassified	Unclassified	Unclassified	*	41.8	23.2	M+H	C27H44O16	-6.76857	1.96555	0.00542615	0.0238494	-1.61861	0.325648	9033.05	27738.7	10566.6	10414.3	6815.33	1138.52	3238.17	16416.7	14641.7	42076.8	29281.4	10914.6	35881.5	13865.5	18424.9	43726.2
4.64_188.1283m/z	188.128	4.64248	pos	(E)-2-Butenyl-4-methyl-threonine		69263		C12029	5282047	81135-57-1	Unclassified	Unclassified	Unclassified	*	56.6	85.7	M+H	C9H17NO3	0.77298	1.96131	0.0110134	0.0366294	0.462521	1.37795	68036.2	49375	67575.3	58554.1	60485	96363.1	63215.4	71311.3	58749.2	42934.6	46648.9	54831.5	43101.6	68918.3	42743	46447.2
11.48_265.2527m/z	265.253	11.4778	pos	6E,11Z-octadecadienal			LMFA06000282		129866842		Lipids and lipid-like molecules	Fatty Acyls	Fatty aldehydes	*	38.4	0	M+H	C18H32O	0.434916	1.95796	0.0016436	0.0127086	0.664884	1.58544	43079.4	27171.9	41610.3	34840.1	38686.2	60865.7	42923	44837.8	37792.4	20612.7	27991.8	31558.9	20489.6	37398.4	25708.6	26443
13.23_325.2714m/z	325.271	13.2349	pos	Medica 16	HMDB0254402	62960			121871	87272-20-6	Lipids and lipid-like molecules	Fatty Acyls	Fatty acids and conjugates	*	37.2	0	M+H-H2O	C20H38O4	-6.776	1.93955	0.00697429	0.0276121	0.637179	1.55528	49647	31921.5	43945.1	34938.4	44367.4	73856.4	50211.4	51082.9	49127.3	32865.6	38954.4	37490.5	22297.4	42228.8	23491.7	26122
2.60_147.0121m/z	147.012	2.59598	neg	2-Oxo-4-methylthiobutanoic acid	HMDB0001553	6319	LMFA01060170	C01180	473	583-92-6	Lipids and lipid-like molecules	Fatty Acyls	Fatty acids and conjugates	*	40.6	14.3	M-H	C5H8O3S	-0.493557	1.93373	0.00164504	0.0127141	-1.90244	0.26749	5798.24	21676.5	4870.72	8310.01	2813.54	39.6316	6508.27	9164.34	8881.17	39133	14247.7	22318.3	25173.9	7907.1	18600	24355.5
13.20_355.2641m/z	355.264	13.2015	neg	(20S,22E)-3beta-Hydroxy-5alpha-chol-22-en-24-oic Acid		84633	LMST04010324		5284071		Lipids and lipid-like molecules	Steroids and steroid derivatives	Bile acids and derivatives	*	51.7	63.4	M-H2O-H	C24H38O3	-0.427539	1.92976	0.00467877	0.0219687	-1.4485	0.366402	9199.03	25106.4	13268.7	7822.47	5015.09	2479.71	6710.35	12751.8	16345.1	39449	16806.5	15977	41297.7	23851.2	14566.2	23797
0.73_195.0509m/z	195.051	0.730267	neg	Gluconic acid	HMDB0000625	345		C00257	10690	526-95-4	Organic oxygen compounds	Organooxygen compounds	Carbohydrates and carbohydrate conjugates	**	41.2	0	M-H	C6H12O7	-0.771978	1.9254	0.000396353	0.00573725	1.40628	2.65053	22499.1	8488.5	28643.2	15793.8	29026.1	30663	17860.3	16468.2	19039	12998.4	13978.9	4683.85	6781.67	4736.75	6381.73	9858.18
0.71_225.0615m/z	225.062	0.71145	neg	D-Mannose	HMDB0000169			C00936	185698	3458-28-4	Organic oxygen compounds	Organooxygen compounds	Carbohydrates and carbohydrate conjugates	***	52.7	65.9	M+FA-H	C6H12O6	-0.446151	1.92439	0.000171898	0.00356387	1.28194	2.43166	23458.2	9647	28979.4	19529.1	32942.7	17061.8	20843.6	28604.9	16245.7	9165.78	9797.86	12602.7	10652.5	9754.96	8030.88	7524.41
12.50_447.2986n	470.288	12.5008	pos	N-(3beta,7beta,dihydroxycholest-5-en-24-oyl) glycine			LMST05030017				Lipids and lipid-like molecules	Steroids and steroid derivatives	Steroid conjugates	*	54.1	75.3	M+H, M+Na	C26H41NO5	0.257373	1.9236	0.00259983	0.0160292	-5.07328	0.0297024	534.741	18003.3	713.872	586.718	1075.86	215.97	2.41397e-06	508.111	642.655	35281	33907.9	8160.3	11915.2	4610.84	12784	19363.5
4.64_277.0899n	322.088	4.63668	neg	Asparagine glutamate	HMDB0248666						Organic acids and derivatives	Carboxylic acids and derivatives	Amino acids, peptides, and analogues	*	39.1	1.1	M-H, M+FA-H	C9H15N3O7	-3.81726	1.92271	0.0128338	0.040377	0.54533	1.45935	59186.9	40556.9	59436.6	49880.2	63710.6	66685.4	63914.8	62935.5	47744.9	23187	40556.4	52844.3	29654.7	67808.8	35612.7	34234.3
0.61_157.0740n	158.081	0.609217	pos	N-Acetylproline	HMDB0094701	43543			66141	68-95-1	Organic acids and derivatives	Carboxylic acids and derivatives	Amino acids, peptides, and analogues	*	45.1	30.5	M+H, M+NH4	C7H11NO3	0.698535	1.92091	0.0468267	0.0978982	-0.657894	0.633803	30774.7	48555.6	22820.4	30793.5	19595.4	16074.6	29124.5	37519.4	59495.1	56182.6	33545.6	44363.2	77508.2	53666.3	39539.4	35083.9
4.62_211.1442m/z	211.144	4.62022	pos	Isoleucylproline	HMDB0011174	62022			444876	37462-92-3	Organic acids and derivatives	Carboxylic acids and derivatives	Amino acids, peptides, and analogues	*	54.7	79.2	M+H-H2O	C11H20N2O3	0.501287	1.92042	0.0457005	0.0964265	2.69253	6.46448	25169.3	3893.47	22585.5	11479.5	18868.4	81700.1	14250.6	12799.6	14501.1	3155.96	4584.97	4090.72	2709.06	6578.83	3389.38	2745.36
8.54_377.2331m/z	377.233	8.54015	neg	21-Hydroxypregnenolone	HMDB0004026	7002	LMST02030167	C05485	247020	1164-98-3	Lipids and lipid-like molecules	Steroids and steroid derivatives	Hydroxysteroids	***	45.5	33.3	M+FA-H	C21H32O3	-0.665661	1.90765	0.0329342	0.0767702	-1.37072	0.386698	11365.1	29390	13473.5	21189.4	2505.71	24.848	5118.25	13006.2	24237.4	47243.7	10637.3	26384.5	59739	19780.4	21195.3	20749.8
13.62_381.1736m/z	381.174	13.6171	neg	S-Japonin	HMDB0035802	91032			131751866	36031-35-3	Lipids and lipid-like molecules	Prenol lipids	Sesquiterpenoids	*	41.1	15.4	M+FA-H	C19H28O3S	-1.55571	1.89617	0.0274461	0.0675424	-2.00881	0.248478	6918.25	27842.5	13042.9	6510.2	3774.51	2382.71	3378.05	6544.2	12795.2	68826.6	34195.9	7722.95	25170.6	8764.08	12978.6	37238.8
12.06_378.2771n	379.284	12.0598	pos	MG(20:4(8Z,11Z,14Z,17Z)/0:0/0:0)	HMDB0011579	62361			53480987		Lipids and lipid-like molecules	Glycerolipids	Monoradylglycerols	***	73.9	92.2	M+H, M+Na, M+H-H2O	C23H38O4	0.210549	1.89376	0.0368614	0.0830382	-1.28394	0.410672	12584.6	30643.8	2175.01	13289.8	3628.45	3707.51	13674.2	1908.28	49708.6	43793.8	29731.3	14135.1	38893.5	17899.7	37105.1	32948.1
10.56_323.2226m/z	323.223	10.5635	neg	Punicic acid	HMDB0030963		LMFA01030923	C08364	12309425	544-72-9	Lipids and lipid-like molecules	Fatty Acyls	Lineolic acids and derivatives	***	57.1	88.8	M+FA-H	C18H30O2	-0.704132	1.89076	0.0005097	0.00651071	-1.31382	0.402253	9896.41	24602.4	12726	11713.6	9296.83	8567	9500.35	8895.64	8575.49	33801.6	28132.4	30811.3	29203.7	11380.2	17312.9	21574.9
0.71_289.0328m/z	289.033	0.71145	neg	D-Sedoheptulose 7-phosphate	HMDB0001068	3418		C05382	92042786	89927-08-2	Organic oxygen compounds	Organooxygen compounds	Carbohydrates and carbohydrate conjugates	***	50.9	57.4	M-H	C7H15O10P	-0.662562	1.8834	0.000113268	0.00281731	-1.32847	0.398191	8532.37	21427.8	3592.31	16396.3	4879.05	2886.87	9799.05	8568.27	13604.8	24981.1	20249.7	26474	18128.1	22021	18424	19716.9
0.69_204.1538m/z	204.154	0.69025	pos	S-(2-(N,N-Diisopropylamino)ethyl)isothiourea	HMDB0244614	427264			132460		Organosulfur compounds	Isothioureas	Unclassified	*	36	0	M+H	C9H21N3S	4.35424	1.87282	0.00715047	0.0280233	-2.17043	0.222145	4422.98	19910.4	2902.37	8255.71	4089.06	1246.37	3638.27	3826.11	7003.01	33820.7	9807.12	12194	40313.9	8980.45	13862.6	20393.9
9.13_172.1697m/z	172.17	9.12665	pos	p-Menth-cis-2-en-1-ol	HMDB0302613				526657		Lipids and lipid-like molecules	Prenol lipids	Monoterpenoids	*	41.7	19.6	M+NH4	C10H18O	0.651316	1.86821	0.00112112	0.0102983	0.624619	1.5418	40774.2	26445.8	39662.2	36748	38738.9	53943.3	41422.8	37979	36925.1	20804.5	25389.7	26725.7	19217.8	38310.8	23399.2	31272.8
3.45_184.0582m/z	184.058	3.446	pos	Acetylhomoserine	HMDB0029423	3282		C01077	528	7540-67-2	Organic acids and derivatives	Carboxylic acids and derivatives	Amino acids, peptides, and analogues	*	38.8	0	M+Na	C6H11NO4	1.20252	1.86747	0.0063416	0.0260963	0.74597	1.6771	39504.2	23555	40380.4	29731	32394.7	63445.7	37788	39758	33031.6	19428.7	22220.5	28392.3	18778.2	34956.8	19300.8	21808
14.56_100.0761m/z	100.076	14.5608	pos	2,5-Dihydro-2,4-dimethyloxazole	HMDB0040518	95009			53654	77311-02-5	Organoheterocyclic compounds	Azolines	Oxazolines	*	46.9	41.6	M+H	C5H9NO	4.63686	1.8658	0.00336477	0.0183147	0.50006	1.41427	52603.6	37194.8	51041.6	43587.2	47622.3	70373.1	52292.9	55501.4	47807.1	33683.8	35092.3	44729.7	30730	49339.2	32054.6	34734.4
1.11_312.0569n	357.055	1.1114	neg	3,5,7,8-Tetrahydro-2-[4-(trifluoromethyl)phenyl]-4H-thiopyrano[4,3-d]pyrimidin-4-one	HMDB0259924	45564			135418940	284028-89-3	Organoheterocyclic compounds	Pyranopyridines	Unclassified	*	39.2	14.4	M-H, M+FA-H	C14H11F3N2OS	8.03119	1.86265	0.00452889	0.0216167	1.10645	2.15315	27040.6	12558.6	35937.1	28564.2	28514.2	15549	25228.9	39074.8	16416.1	5820.18	17617.4	20719.2	5390.19	19138.2	9908.12	9317.07
14.72_310.2870n	309.28	14.7215	neg	6-methyl-9-heptadecenoic acid			LMFA01020428				Lipids and lipid-like molecules	Fatty Acyls	Fatty Acids and Conjugates	*	39.1	0	M-H, M+FA-H	C20H38O2	-0.500616	1.86084	0.00767396	0.0293299	-0.895639	0.537509	17992.2	33473.3	16878.9	15107.4	13596.2	5452.64	15222.8	20594.5	39093.1	45988.8	30556.9	25151.8	37537.2	27739.6	28419.7	38919.2
13.86_136.1122m/z	136.112	13.8555	pos	(R)-(+)-beta-Methylphenethylamine		426011			1547949	52991-03-4(HCl)	Unclassified	Unclassified	Unclassified	*	39.2	0	M+H	C9H13N	0.755619	1.84781	0.00813203	0.0303945	0.422829	1.34055	63860	47637.1	60191.5	58912.4	56543.3	87362.7	62445.8	66192.2	55372.4	42690.4	45948.3	56776.7	42127	61129	41578.8	43209.2
4.38_171.0992m/z	171.099	4.3836	pos	(2R,3R)-heptane-1,2,3-triol			LMFA05000549		444397		Lipids and lipid-like molecules	Fatty Acyls	Fatty alcohols	*	40.2	6.16	M+Na	C7H16O3	0.571306	1.84283	0.0158663	0.0465653	0.897208	1.86246	38535.2	20690.5	40426.1	25596.1	20246	66661.3	28969.7	36251.6	51595.5	18417.8	18793.4	24876.1	17955.7	29627.2	16638.9	18524.3
4.16_275.1468m/z	275.147	4.15805	pos	4alpha-hydroxy-tetrahydrobiopterin	HMDB0304198	64413		C15522	129803		Organoheterocyclic compounds	Pteridines and derivatives	Pterins and derivatives	*	39.9	2.6	M+NH4	C9H15N5O4	2.07847	1.83709	0.0291336	0.0704053	0.65254	1.57193	56655.9	36042.2	61943.6	45121.3	49204.1	80951.4	43946.6	39636.8	75787.5	16458.5	26818.1	50627.9	40234.1	55625.2	22393.6	40138
5.92_170.1420n	171.149	5.92435	pos	2-Amino-3-methyl-1-pyrrolidin-1-YL-butan-1-one	HMDB0246938				4470972		Organic acids and derivatives	Carboxylic acids and derivatives	Amino acids, peptides, and analogues	*	38.4	1.86	M+H, M+Na	C9H18N2O	0.445505	1.82237	0.0169974	0.0487366	0.405889	1.32491	73805.9	55706.6	63724.3	67561.9	72425.6	102700	67995.6	76003.8	66230.7	45210.9	46557.9	56419.2	56984.8	78338.9	53785.3	52648.9
10.88_204.1385m/z	204.138	10.8797	pos	(all-E)-3,5,7-Tridecatriene-9,11-diyn-1-ol	HMDB0038526	93201			131752390		Lipids and lipid-like molecules	Fatty Acyls	Fatty alcohols	*	44.3	27.6	M+NH4	C13H14O	1.05284	1.81211	0.000529927	0.00664256	0.814105	1.75821	30194.1	17173.3	27401.3	26847.2	26597.1	39471.8	30374.8	34221.5	26445.3	12088.6	18754.9	21969.7	11198.6	26065.5	15917.1	14218.3
0.77_620.1013m/z	620.101	0.773817	neg	Cyanidin 3-(3'',6''-dimalonylglucoside)	HMDB0030096		LMPK12010138	C16289	23724697	171828-60-7	Phenylpropanoids and polyketides	Flavonoids	Flavonoid glycosides	*	51	65.7	M-H	C27H25O17+	-0.935027	1.80797	0.000234246	0.00426783	2.96281	7.7964	15039.3	1929.01	11344.9	23647.9	21813.6	8397.33	20520.6	9015.19	10535.8	846.172	3943.93	2110.01	1778.51	1867.39	1866.04	1091
8.05_299.1831m/z	299.183	8.05053	pos	Caffeine, 8-((3-methoxypropyl)amino)-	HMDB0247409				56998		Organoheterocyclic compounds	Imidazopyrimidines	Purines and purine derivatives	*	39	0	M+NH4	C12H19N5O3	1.85822	1.80525	0.00486332	0.0224568	-5.15874	0.0279941	398.521	14235.9	591.023	303.909	739.591	412.947	219.488	100.754	421.936	2242.66	6149.79	28503.8	15606.3	25886.7	17755.9	3506.22
9.66_398.2417m/z	398.242	9.65823	pos	Bopindolol	HMDB0015696	85591			44112	69010-88-4	Benzenoids	Benzene and substituted derivatives	Benzoic acids and derivatives	*	37.5	0	M+NH4	C23H28N2O3	-5.69181	1.79413	0.0484856	0.100248	0.501335	1.41552	62506.8	44158.1	56366.3	43024.3	49507.3	106507	66203.9	67835.8	48103.2	49596	38125.7	44584	37169.8	48765.9	48675	42190.2
0.59_442.2514m/z	442.251	0.58995	pos	Spergualin		71307		C16747	15916864	80902-43-8	Unclassified	Unclassified	Unclassified	*	38	0	M+K	C17H37N7O4	-6.12012	1.79317	0.00729314	0.0283593	0.81598	1.76049	35001.9	19881.9	34594.5	29345	33084.6	45346.6	38000.1	39334.2	25308.4	6704.14	13498.4	28234.4	12859.5	37732.9	21900.8	18243.1
0.59_413.2132m/z	413.213	0.58995	pos	AFP 07 (free acid)		96511			95549476	788799-13-3	Unclassified	Unclassified	Unclassified	*	49.8	62.9	M+H	C22H30F2O5	-0.478268	1.79077	0.0215407	0.0572012	0.976653	1.96789	35017.2	17794.2	46400.8	42456.3	22150.2	32448.4	7838.72	39927.7	53898	25208.9	12602.9	9164.94	26991.2	13539.5	13530.3	23521.8
14.53_294.2428m/z	294.243	14.5264	pos	6,11-octadecadiynoic acid		74187	LMFA01030530		5312660		Lipids and lipid-like molecules	Fatty Acyls	Fatty Acids and Conjugates	*	38.7	0	M+NH4	C18H28O2	0.340975	1.78616	0.00230946	0.0150365	0.510612	1.42465	44879.7	31502.2	45361.5	42596.7	40612.3	56631.8	47627.2	43765.9	37562.6	29015.1	28805.2	37864.2	20569.5	41779.4	29876.1	32605.9
0.69_445.0533m/z	445.053	0.690683	neg	CDP-ethanolamine	HMDB0001564	3538		C00570	123727	3036-18-8	Nucleosides, nucleotides, and analogues	Pyrimidine nucleotides	Pyrimidine ribonucleotides	*	46.9	40.3	M-H	C11H20N4O11P2	0.507257	1.78128	0.000535131	0.00668309	1.46787	2.76613	19183.5	6935.17	21414.7	17211.6	25570.6	23339	21379.7	17472.5	7896.81	2435.19	10287.8	11164.3	3881.74	10893	6300.25	3583.88
4.70_248.0175m/z	248.018	4.70173	neg	(2R,3S)-2-methylisocitrate	HMDB0303970				23615311		Organic acids and derivatives	Carboxylic acids and derivatives	Tricarboxylic acids and derivatives	*	39.5	0.0905	M+FA-H	C7H7O7-3	0.595565	1.77656	0.00542129	0.02384	-2.48962	0.178054	3137.64	17621.9	2178.29	5011.58	1536.5	2.41397e-06	2744.31	4773.03	5719.76	37624.9	10035.1	11921.9	23724.8	3657.18	15053.8	21335.4
2.99_194.1158n	217.105	2.98722	pos	Tetraethylene glycol	HMDB0094708				8200		Organic oxygen compounds	Organooxygen compounds	Ethers	*	45.5	32.8	M+Na, M+K, M+H	C8H18O5	2.15734	1.77594	0.0266812	0.0663833	0.3484	1.27315	73492.5	57725	85824.2	74669.1	63786.9	90195.8	61570.3	75490.9	62910.7	66475.4	46884.2	76818.3	44014.8	61534.5	48380.4	59967.7
2.02_217.0474m/z	217.047	2.01912	pos	(2S,3R,4S,5R,6R)-6-Ethyloxane-2,3,4,5-tetrol	HMDB0242656				20707644		Organic oxygen compounds	Organooxygen compounds	Carbohydrates and carbohydrate conjugates	*	39.5	0	M+K	C7H14O5	0.798427	1.7744	0.0206672	0.0558083	0.44705	1.36325	60589.9	44445.2	60773.5	49698	56003.7	87601.4	56891.5	62140	51021.1	37966.3	42573.3	52238.5	35240.3	62214.9	36720	44162.8
4.70_299.0148m/z	299.015	4.70173	neg	2,2,3,3,3-Pentafluoro-1-propanol	HMDB0245341	337146			9872		Organohalogen compounds	Halohydrins	Fluorohydrins	*	42	21.4	2M-H	C3H3F5O	4.08239	1.77416	0.00343385	0.0185364	-1.76624	0.293974	5848.73	19895.4	4275.79	9046.37	2828.24	0.136114	4984.7	9215.07	10590.8	35049.2	13456.2	17064.4	24803.3	5981.26	17231.8	25681.5
8.05_191.1311n	192.138	8.05053	pos	Diethyltoluamide	HMDB0250930	3982		C10935	4284	134-62-3	Benzenoids	Benzene and substituted derivatives	Toluenes	*	57.2	87.6	M+H, M+Na	C12H17NO	0.61251	1.77124	0.0233854	0.0605148	0.874858	1.83383	44733.2	24393.3	39972.5	43257.5	30986.7	26680.6	66742.7	30889.3	74602.9	14323.7	18978.3	35450.6	27029.8	35153.8	25095.9	14721.2
13.36_347.3157m/z	347.316	13.3614	pos	1-O-(2R-methoxy-hexadecyl)-sn-glycerol			LMGL01020039		14582682		Lipids and lipid-like molecules	Glycerolipids	Monoradylglycerols	*	43.1	20.9	M+H	C20H42O4	0.258389	1.75673	0.00500122	0.0228385	0.513256	1.42727	45139	31626.1	57545.5	37333.2	40429.2	58921.7	41765.5	41082.6	38895.1	30324.4	32215.5	35943.4	28322.6	40655.5	25953.8	27967.8
12.48_449.2906m/z	449.291	12.481	neg	1alpha,25-dihydroxy-21-nor-20-oxavitamin D3 / 1alpha,25-dihydroxy-21-nor-20-oxacholecalciferol			LMST03020029		9547289		Lipids and lipid-like molecules	Steroids and steroid derivatives	Secosteroids	*	39.7	0	M+FA-H	C25H40O4	-0.607204	1.75659	0.027947	0.0684216	-1.17244	0.44367	11902.9	26828.2	7739.83	11497.5	7983.07	2383.74	9913.94	13275.3	30526.9	47892	21711	15696.4	41038.5	16934.7	28830.3	15694.8
12.84_551.3954n	552.403	12.8415	pos	LysoPC(20:0/0:0)	HMDB0010390	61700	LMGP01050045	C04230	24779473	108341-80-6	Lipids and lipid-like molecules	Glycerophospholipids	Glycerophosphocholines	***	59.4	74.7	M+H, M+Na	C28H58NO7P	0.618557	1.75538	0.00619776	0.0258234	-1.64752	0.319188	6788.9	21269.3	9618.1	4915.46	5332.76	13444.2	2721.3	3686.69	7803.79	41519.5	21378.1	14787.2	26388.9	13988.8	7742.81	23079.7
10.39_276.1727n	277.18	10.3875	pos	Cyclandelate	HMDB0015586	3970			2893	456-59-7	Benzenoids	Benzene and substituted derivatives	Unclassified	*	50.6	57.2	M+H-H2O, M+H	C17H24O3	0.439549	1.75451	0.000450868	0.00614166	0.719953	1.64713	28972.8	17589.9	34148.8	27262.9	30361.3	32721.2	26236.2	32957.2	19121.8	16001.4	17982.3	20590.5	13465	23038.8	13892.8	18158.1
14.59_582.5099m/z	582.51	14.5862	neg	Arginine-betaxanthin	HMDB0304647						Organic oxygen compounds	Organooxygen compounds	Alcohols and polyols	*	36.4	0	M+FA-H	C34H67NO3	-0.660045	1.75441	8.4247e-07	0.000188324	2.85109	7.21546	12162.2	1685.58	10793.6	15369.9	11775.4	13018.5	14475.7	12754	6948.53	740.304	1232.68	1211.6	500.102	3569.41	3041.52	1503.43
4.51_242.0922n	243.099	4.51315	pos	beta-Lapachone	HMDB0249138	68281		C10367	3885	4707-32-8	Organoheterocyclic compounds	Naphthopyrans	Naphthopyranones	*	43.5	35.8	M+H, M+Na	C15H14O3	-8.80019	1.74186	0.0281686	0.0687689	0.43214	1.34923	64839.9	48056.9	60363.1	60652.2	48684.3	98813.8	60197.1	63763.4	61405.6	46229.5	39749.4	53973	42860.8	62334	40014.5	51236.9
10.66_344.3525m/z	344.353	10.6604	pos	19-methyl-eicosanoic acid		34650	LMFA01020223		3632876		Lipids and lipid-like molecules	Fatty Acyls	Fatty Acids and Conjugates	*	43.9	23.9	M+NH4	C21H42O2	0.679044	1.73673	0.0240933	0.0617894	0.606796	1.52287	47400.3	31125.6	65367.3	40279.7	64374.4	47418.1	45769.1	41083.9	27509.8	23864.4	32531.4	34893.9	44647.2	40349	24044.9	17548.4
11.23_580.3616m/z	580.362	11.2341	neg	PC(18:0(11cp)/0:0)			LMGP01050145		15515616		Lipids and lipid-like molecules	Glycerophospholipids	Glycerophosphocholines	*	57.7	96	M+FA-H	C27H54NO7P	-0.704655	1.7341	0.00178535	0.0132733	-2.18204	0.220364	3730.19	16927.4	2601.31	2777.47	2549.2	7947.56	1835.55	1019.3	7380.93	30444.1	20956.7	8273.61	18113.5	5622.51	15364.5	19717
1.29_674.1292n	719.126	1.28923	neg	Adenosine thiamine diphosphate	HMDB0013647	85242			53481915		Nucleosides, nucleotides, and analogues	Purine nucleotides	Purine ribonucleotides	*	37.7	0	M-H2O-H, M+FA-H	C22H30N9O10P2S+	-2.83755	1.71798	8.03766e-06	0.000601479	-3.66876	0.0786308	880.192	11194	2.41397e-06	1594.8	2.41397e-06	2.41397e-06	2.41397e-06	309.982	4256.56	8517.38	8003.74	13049	9801.3	14949.4	8304.07	15733
11.74_275.2014m/z	275.201	11.735	neg	Stearidonic acid	HMDB0006547	34838	LMFA01030357	C16300	5312508	20290-75-9	Lipids and lipid-like molecules	Fatty Acyls	Lineolic acids and derivatives	***	55.7	57.9	M-H	C18H28O2	-1.0218	1.71268	0.00577379	0.0247594	-1.55536	0.340245	7148.7	21010.5	8133.91	3036.96	6636.4	3978.21	7172.41	8785.25	12297.7	40985.5	18714.5	11198.6	20774.6	12108.7	15288.5	28002.8
4.47_183.0662m/z	183.066	4.46543	neg	1-(2-Furanyl)-1-butanone	HMDB0039802	94351			228588	4208-57-5	Organic oxygen compounds	Organooxygen compounds	Carbonyl compounds	*	49	47.3	M+FA-H	C8H10O2	-0.799242	1.71251	0.018013	0.0507189	0.421824	1.33962	60706.9	45316.5	59878.6	56833.8	63052.5	57689.4	67981.7	68051.6	51460.6	29345.7	44990.1	56951.8	34947.4	69142.5	41357.2	40480.8
0.65_219.0830m/z	219.083	0.648267	pos	1-(2-Thienyl)-1-heptanone	HMDB0040241	94772			141581	30711-40-1	Organic oxygen compounds	Organooxygen compounds	Carbonyl compounds	*	36.1	0	M+Na	C11H16OS	8.03414	1.7101	4.45448e-05	0.00158184	0.733528	1.6627	26896.6	16176.4	32815.4	26363.2	25424.8	24328.7	30990	26346.3	22007.7	17698.4	13255.8	14633.5	18197.2	19865.2	13211.9	16372.9
12.47_315.2327m/z	315.233	12.4742	neg	15-phenyl-9E-pentadecenoic acid			LMFA01140078		102355721		Lipids and lipid-like molecules	Fatty Acyls	Fatty Acids and Conjugates	*	50.6	57.7	M-H	C21H32O2	-0.804519	1.70635	0.00275044	0.0165533	-1.21503	0.430764	9570.14	22216.7	11558.8	4438.1	10059.3	6290.01	7056.89	12636.2	14951.8	38171.5	19886.7	13883.7	24619.2	18740.7	15954.8	24260.1
13.51_634.4444m/z	634.444	13.506	pos	PA(14:1(9Z)/16:1(9Z))		81279	LMGP10010113		52928706		Lipids and lipid-like molecules	Glycerophospholipids	Glycerophosphates	*	39.1	0	M+NH4	C33H61O8P	0.312679	1.70122	0.00890594	0.0321648	-0.494304	0.709904	34078.9	48004.9	39727.6	28953.7	43366.9	28589.4	22113.2	33344.5	42456.8	63754	48142.1	43855.1	43143.5	48721.2	36094.7	52323.4
12.60_790.5242m/z	790.524	12.5973	pos	PA(PGE1/18:1(11Z))	HMDB0263774						Unclassified	Unclassified	Unclassified	*	41.8	24	M+NH4	C41H73O11P	1.73312	1.70098	0.00869824	0.0316755	-0.982956	0.505942	13456.3	26596.4	16856.8	12115.1	8193.42	8240.86	7068.55	15240.2	26478.8	43463.3	15802.8	22388.8	29001.7	21687.1	29128.2	24703.2
10.82_634.3336m/z	634.334	10.8233	neg	PC(2:0/PGE1)	HMDB0288894						Unclassified	Unclassified	Unclassified	*	41.6	17.8	M-H	C30H54NO11P	-4.11666	1.69699	0.0220589	0.0581082	-1.56084	0.338954	7470.46	22039.7	262.428	11047.5	2188.29	25930	6627.56	192.451	6044.99	34214.7	17131.9	12747.6	32782.9	11532.6	35498.2	10370.5
0.73_490.1768m/z	490.177	0.72705	pos	4-O-Methyl-a-D-glucosyl-(1->2)-b-D-xylosyl-(1->4)-D-xylose	HMDB0039742	94294			78382737	10365-86-3	Organic oxygen compounds	Organooxygen compounds	Carbohydrates and carbohydrate conjugates	*	38.7	0	M+NH4	C17H28O15	0.356353	1.69082	0.0185012	0.0516055	-0.501535	0.706355	34035.8	48185.2	31565.5	31162.4	27756	45012.1	15842.1	37903.9	49008.8	61008.7	45349.3	36086.5	54880.1	45865.9	50042.9	44062.7
0.79_391.0160m/z	391.016	0.794883	neg	Ceftibuten	HMDB0015485	313640		C08117	5282242	97519-39-6	Organoheterocyclic compounds	Lactams	Beta lactams	*	46	53.3	M-H2O-H	C15H14N4O6S2	-3.87034	1.68555	0.00213326	0.014516	3.82537	14.1759	12682	894.622	12771.4	3326.38	20913.4	13461.3	21976	15242.9	1082.93	1763.36	1183.93	440.133	701.026	290.968	809.898	1073.03
14.51_118.9924m/z	118.992	14.515	neg	Pentafluoroethane	HMDB0256265						Organohalogen compounds	Organofluorides	Unclassified	*	39.3	0	M-H	C2HF5	-1.20664	1.68164	1.36063e-05	0.000796103	1.04035	2.05673	19248.6	9358.85	20169.6	17487.6	19167.3	21805.6	20825.2	21499.8	13785	6425.12	9121.38	11704.6	7373.53	13382.4	8814.8	8690.17
10.33_284.3313m/z	284.331	10.3283	pos	14S-Methyl-1-octadecene		97436	LMFA11000019		11021850		Lipids and lipid-like molecules	Fatty Acyls	Hydrocarbons	*	39.4	1.32	M+NH4	C19H38	0.345113	1.66715	0.000114772	0.00282252	-3.11991	0.11503	1328.53	11549.4	1927.24	942.622	1126.94	1396.58	1376.73	1806.08	723.548	13507.6	9400.58	9355.34	21627.4	7571.67	10337.3	9046.03
1.87_493.2750m/z	493.275	1.86993	pos	DG(2:0/0:0/PGF2alpha)	HMDB0296917						Unclassified	Unclassified	Unclassified	*	37.4	0	M+Na	C25H42O8	-4.59228	1.66053	0.00294101	0.017062	1.45839	2.74801	18957.1	6898.49	14308.2	12964.8	28972.6	29138.6	22943.8	15239	9132.75	3361.64	10089.8	10468.8	5832.68	6139.13	9035.1	3362.28
14.70_243.0023m/z	243.002	14.7033	pos	4,4'-Dipyridyl disulfide	HMDB0246606	462928			75846		Organoheterocyclic compounds	Pyridines and derivatives	Unclassified	*	41	16.8	M+Na	C10H8N2S2	0.955319	1.65582	0.0208232	0.0560439	0.362712	1.28584	64270.2	49983	62699.3	56264.9	58591	85806.8	65438	65236.7	55854.6	48540.9	48679.4	61667.9	39147.3	64852.3	40880.6	46112.6
14.51_136.9991m/z	136.999	14.515	neg	Orotic acid	HMDB0000226	318		C00295	967	65-86-1	Organoheterocyclic compounds	Diazines	Pyrimidines and pyrimidine derivatives	*	39.8	2.8	M-H2O-H	C5H4N2O4	-0.888595	1.64708	0.0322503	0.0757838	0.332173	1.25891	73140.6	58098.4	73431.3	66352	74344.2	78940.3	80082.9	79478.2	59355.1	41809.9	59761.4	66983.2	46509.1	85129.4	54355.9	52140.2
11.06_466.3505n	484.384	11.0579	pos	LysoSM(d18:0)	HMDB0012082	41562	LMSP01060002		44260122		Lipids and lipid-like molecules	Sphingolipids	Phosphosphingolipids	*	37.7	0	M+NH4, M+Na	C23H51N2O5P	-6.56254	1.64281	0.0219555	0.0578972	2.16272	4.4776	17742.2	3962.45	14985.5	5487.75	5816.98	41150.4	32520.3	14917.8	9316.91	3293.23	6055.4	4221.26	3269	3075.82	3170.07	4652.34
0.71_593.1567m/z	593.157	0.71145	neg	Carboxydextran	HMDB0249656						Lipids and lipid-like molecules	Fatty Acyls	Fatty acyl glycosides	*	38.2	0	M+FA-H	C19H32O18	-0.656535	1.63966	0.00524192	0.0233994	2.16576	4.48703	14682.2	3272.14	27026.8	10896.7	7342.48	24010.1	3364.21	13717.4	16417.7	6422.51	3388.49	1068.93	3345.55	610.07	1852.52	6216.89
7.40_446.1216n	469.111	7.40428	pos	Isokaempferide 7-rhamnoside			LMPK12112670				Lipids and lipid-like molecules	Polyketides	Flavonoids	*	39.7	3.28	M+H-H2O, M+Na, M+H	C22H22O10	0.61932	1.639	0.00209327	0.0144033	0.662343	1.58265	30016	18965.7	28282.7	24137.8	26207.7	43537.1	28927.3	34405.7	24613.7	16491.2	19240.9	19379.6	15534.7	24389.8	17391.8	20331.6
12.53_463.2076m/z	463.208	12.5267	neg	Acetamide, 2-(4-(2-((2-hydroxy-3-phenoxypropyl)amino)ethoxy)phenoxy)-N-(2-methoxyethyl)-, (S)-	HMDB0259996				4573889		Benzenoids	Phenol ethers	Unclassified	*	39.3	0.292	M+FA-H	C22H30N2O6	-2.29253	1.63835	0.00264974	0.0161938	-0.829447	0.562745	15076.7	26791.3	23205.2	7591.76	10488.5	5996.91	15795.9	21701.4	20756.9	28657	25078.6	24777.3	31979.8	29816.2	19397.6	27832.4
11.14_642.3775m/z	642.378	11.1386	neg	OHOHA-PC			LMGP20010033		134812311		Lipids and lipid-like molecules	Glycerophospholipids	Oxidized glycerophospholipids	*	51.8	63.1	M-H2O-H	C33H60NO10P	-0.142122	1.63592	3.6887e-05	0.00141969	-1.50663	0.351933	5203.28	14784.9	3054.4	4585.53	3772.61	7131.61	4711.93	2616.77	10550.1	16599.9	12878.7	10653.1	16245.2	11986.2	17412	17719
13.12_151.0966m/z	151.097	13.1211	pos	TRIETHYLENE GLYCOL	HMDB0259193						Organic oxygen compounds	Organooxygen compounds	Ethers	*	40.6	6.99	M+H	C6H14O4	0.474632	1.63501	0.00401451	0.020132	0.47079	1.38587	43033	31051.3	41030.4	38434.4	39866.4	58217.7	43114.1	43505	37063.2	28291	30838.4	36557.5	26238.1	40544.6	27141.4	27748.1
3.71_226.0720n	227.079	3.71483	pos	lysine phosphoester	HMDB0254265				76500745		Organic acids and derivatives	Carboxylic acids and derivatives	Amino acids, peptides, and analogues	*	45.9	35	M+H, M+Na	C6H15N2O5P	0.640523	1.63285	0.00633559	0.0260844	0.710962	1.6369	35854.7	21904.1	38399.6	37930.5	41288.4	21633.6	37824.7	21824.6	52081.7	23045.3	21709.5	21751.8	26045.4	16971.3	21208.4	22597.1
4.69_367.0021m/z	367.002	4.69347	neg	2-Thiouric acid	HMDB0245324	435839			3034255		Organoheterocyclic compounds	Imidazopyrimidines	Purines and purine derivatives	*	37.5	0	2M-H	C5H4N4O2S	-4.29507	1.62889	0.00238681	0.0152889	-1.70647	0.30641	5110.3	16678	3659.16	7268.71	2425.86	2.41397e-06	4783.35	8281.67	9353.33	27991.8	12044.7	15018.6	20251.3	5727.49	14196	21516
0.73_198.0891m/z	198.089	0.72705	pos	Aminovaleric acid betaine	HMDB0240732				14274897		Lipids and lipid-like molecules	Fatty Acyls	Fatty acids and conjugates	*	46.9	57.8	M+K	C8H17NO2	0.0512987	1.62415	0.000352055	0.00534283	0.758723	1.69199	25305.4	14956	27716.9	27052.8	26387.5	22474.4	17131.3	32279.5	24095.6	11229.5	11240.5	17124.9	16345.9	18559.7	16380	13811.4
0.82_710.0977m/z	710.098	0.816917	neg	Nicotinic acid adenine dinucleotide	HMDB0001179	4234		C00857	165491	6450-77-7	Nucleosides, nucleotides, and analogues	(5'->5')-dinucleotides	Unclassified	*	41.2	15.1	M+FA-H	C21H27N6O15P2+	-2.18813	1.62257	0.00114959	0.010456	-2.03455	0.244084	3499.42	14337	924.407	2333.41	5526.42	603.429	3926.05	2259.45	8922.81	8712.37	18540.6	26059.5	12482.6	10068.8	10544.4	13950.7
9.65_563.3228n	546.319	9.64948	pos	OOB-PE			LMGP20020034		134812364		Lipids and lipid-like molecules	Glycerophospholipids	Oxidized glycerophospholipids	*	54.5	77.4	M+H-H2O, M+Na	C27H50NO9P	0.789884	1.62127	0.00138925	0.0115742	0.89572	1.86054	24192.9	13003.2	22921.2	28981.3	30306.2	19876.3	14480.6	24507.3	28277.2	14292	7833.81	9466.3	11280.5	12351.2	14431.7	21366.7
14.83_335.2954m/z	335.295	14.8341	neg	Docosadienoate (22:2n6)	HMDB0061714	35068	LMFA01030405	C16533	5312554	17735-98-7	Lipids and lipid-like molecules	Fatty Acyls	Fatty acids and conjugates	*	42.9	0	M-H	C22H40O2	-0.427055	1.6203	0.00590161	0.0250787	-1.04697	0.483983	10705.1	22118.7	12961.1	10156.4	8456.72	3031.9	10597.6	12399.8	17332	30239.5	19821.4	13039.7	35233.6	19343.8	15725.8	21427.1
10.72_442.3893m/z	442.389	10.7162	pos	3-Methyloctadecanoylcarnitine	HMDB0240893						Lipids and lipid-like molecules	Fatty Acyls	Fatty acid esters	*	48	47.1	M+H	C26H51NO4	0.587216	1.61813	0.00303742	0.0173893	1.42547	2.68603	18075.9	6729.6	23019.3	25481.1	20021.8	5866.86	22507.7	16288.9	13345.7	3637.83	6695.89	2148.21	12162.9	2013.65	12565	7883.78
13.83_307.2640m/z	307.264	13.8338	neg	Eicosadienoic acid	HMDB0005060	62964	LMFA01031043	C16525	6439848	5598-38-9	Lipids and lipid-like molecules	Fatty Acyls	Fatty acids and conjugates	**	45.6	0	M-H	C20H36O2	-0.731605	1.61617	0.00245404	0.0155595	-1.52127	0.348379	5824.98	16720.2	4710.47	4271.15	4302.82	1584.1	5547.77	5903.58	14455	26319.4	17839.2	10741.4	22476	11118.2	9908.79	18638.6
10.74_266.1648n	267.172	10.7436	pos	TRIBUTYL PHOSPHATE	HMDB0259164	70062		C14439	31357	126-73-8	Organic acids and derivatives	Organic phosphoric acids and derivatives	Phosphate esters	*	44	22.9	M+H, M+Na	C12H27O4P	0.314217	1.61594	0.00390212	0.0197919	0.999755	1.99966	20324.4	10163.9	26601.5	19106.7	24274.8	16510.4	21803.4	21836.3	12137.4	5449.44	19750.2	10854.2	4510.28	7368.43	7109.91	16104.9
10.58_552.3307m/z	552.331	10.5811	neg	PC(17:1(9Z)/0:0)		76568	LMGP01050126		24779451		Lipids and lipid-like molecules	Glycerophospholipids	Glycerophosphocholines	***	54.4	75.1	M+FA-H	C25H50NO7P	0.0086989	1.61454	0.00113307	0.0103713	-1.68418	0.311179	4780.08	15361.2	1133.33	6740.29	2865.87	11731.3	4823.34	655.212	5511.15	24605.6	15110.7	10399.8	19676	8903.85	15357.5	13474.6
9.61_242.1540m/z	242.154	9.61065	pos	Norbutorphanol	HMDB0041954	96191			5490068	3792-68-5	Benzenoids	Phenol esters	Unclassified	*	46.8	37.1	M+H-H2O	C16H21NO2	0.26311	1.61171	0.000372479	0.00553197	-11.0023	0.0004875	4.84816	9944.95	2.41397e-06	2.41397e-06	2.41397e-06	33.9371	2.41397e-06	2.41397e-06	2.41397e-06	3122.78	8970.02	18855.5	11043.4	12410.7	11378.5	3833.72
3.89_689.3343m/z	689.334	3.89272	pos	Digoxigenin bisdigitoxoside		2058			92999	5297-05-2	Unclassified	Unclassified	Unclassified	*	37	0	M+K	C35H54O11	6.95934	1.60437	0.000808057	0.00850802	2.09054	4.25906	13903.3	3264.41	11854.6	10348.6	12043.5	25765.4	15617.7	10186.3	11507.1	684.759	2800.7	9729.67	1770.09	4474.11	2171.34	1220.16
9.23_361.1631m/z	361.163	9.22802	neg	Thyrotropin-releasing factor	HMDB0259062				32281		Organic acids and derivatives	Carboxylic acids and derivatives	Amino acids, peptides, and analogues	*	44.3	25	M-H	C16H22N6O4	0.46519	1.60432	0.00412492	0.0204399	0.562716	1.47705	34623.8	23441.2	40234.5	35378.3	28151.2	32494.7	39460.9	37012.2	29634.6	11670.6	27292.4	21438.8	22289.9	34817.9	23564.3	23014.4
7.68_419.2050m/z	419.205	7.67528	neg	Trospectomycin	HMDB0259301				13580504		Organoheterocyclic compounds	Dioxanes	1,4-dioxanes	*	46.6	40.9	M+FA-H	C17H30N2O7	4.04737	1.60008	0.0441695	0.0939195	-1.03824	0.48692	12521.4	25715.6	9973.24	22524	4841.85	1824.87	6785.93	13218.6	28481.5	39109	14479.6	25833.4	45089.8	15613.7	16115	23768.6
11.11_466.2936m/z	466.294	11.1128	neg	1-Heptadecanoylglycerophosphoethanolamine	HMDB0061691	77696	LMGP02050030		52925149		Lipids and lipid-like molecules	Glycerophospholipids	Glycerophosphoethanolamines	***	66.3	90.9	M-H	C22H46NO7P	-0.746475	1.59986	0.00352988	0.0188137	-1.54066	0.343728	5425.97	15785.7	6324.66	5890.16	3995.94	2117.35	5411.42	3744.8	10497.5	24642	10260.6	13328.9	26687.5	14327.6	8110.8	13142.4
8.90_335.1830m/z	335.183	8.89673	pos	Arteether	HMDB0242731				500080		Lipids and lipid-like molecules	Prenol lipids	Sesquiterpenoids	*	39.1	0	M+Na	C17H28O5	0.356549	1.5991	0.0486764	0.100559	-1.51609	0.349632	7771.14	22226.6	7538.74	6913.18	3776.27	1174.75	3130.83	10692.4	21171.8	51303.9	10328.1	9426.54	33262.9	10378	12251.2	28635.6
0.83_233.1497m/z	233.15	0.82825	pos	5-hydroxyoct-7-enoylglycine	HMDB0094765				131802945		Organic acids and derivatives	Carboxylic acids and derivatives	Amino acids, peptides, and analogues	*	46.1	33.2	M+NH4	C10H17NO4	0.583705	1.59703	9.02449e-05	0.0024972	-0.826782	0.563785	11281.1	20009.5	8038.77	12538.3	15648.8	8105.99	12991.6	8711.12	12932.9	20560.3	16459.7	20332.4	24589.8	20525.2	20496.9	17102.4
0.69_261.0779m/z	261.078	0.69025	pos	Isopropyl β-D-ThiogalactoPyranoside		44762			656894	367-93-1	Unclassified	Unclassified	Unclassified	*	36.7	0	M+Na	C9H18O5S	5.13265	1.59544	0.0170669	0.0488474	2.66151	6.32693	15767.4	2492.11	22817.1	6325.54	31528.2	12716	28832.9	6478.05	1674.35	2.41397e-06	2.41397e-06	2112.25	395.97	12057.8	2878.79	2.41397e-06
1.09_135.0311m/z	135.031	1.0895	neg	Hypoxanthine	HMDB0000157	83		C00262	790	68-94-0	Organoheterocyclic compounds	Imidazopyrimidines	Purines and purine derivatives	***	53.3	73.3	M-H	C5H4N4O	-0.700335	1.59273	0.019505	0.0534815	-1.46085	0.363279	6613.99	18206.4	2629.38	6353.17	1341.77	506.445	2343.46	7237.4	25886.3	30163.6	10627.3	15055.4	23856.8	18372.7	10259.6	19109.3
13.61_844.5826m/z	844.583	13.6065	pos	PS(O-18:0/20:0)		78733	LMGP03020086		52926175		Lipids and lipid-like molecules	Glycerophospholipids	Glycerophosphoserines	*	37	0	M+K	C44H88NO9P	-0.332952	1.5908	0.000625393	0.00731344	0.727612	1.6559	27812.8	16796.2	25899.7	25578.9	34587.6	28179.1	26794.2	23484.8	30165.5	20993.9	18630.4	11206.4	13398.7	25703	14692.2	12949.1
6.85_225.1024m/z	225.102	6.85322	pos	3-Amino-4-methoxybenzanilide	HMDB0245807	325357			8426		Benzenoids	Benzene and substituted derivatives	Anilides	*	44.5	25.6	M+H-H2O	C14H14N2O2	0.531115	1.5859	0.000179429	0.00365899	2.862	7.27023	10931.4	1503.59	19377.2	9025.53	15240.6	7965.21	8788.47	8415.62	7707.4	232.58	573.402	2646.26	1484.44	3188.67	1893.74	506.03
2.75_317.1153m/z	317.115	2.75287	pos	alhpa-tocopheronolactone		53844	LMPR02020063		52929836		Lipids and lipid-like molecules	Prenol lipids	Quinones and hydroquinones	*	38.7	0	M+K	C16H22O4	1.13776	1.58202	0.0192812	0.0530348	0.614614	1.53115	37412.8	24434.5	37472.2	27964.4	32777.2	59690.1	35050.5	37497.5	31437.9	19008	22854.8	28770	18968.8	39145.7	19947.8	22346.3
0.86_164.9569m/z	164.957	0.861383	neg	Sodium phosphate (Na(H2PO4))	HMDB0303430				24204		Mixed metal/non-metal compounds	Alkali metal oxoanionic compounds	Alkali metal phosphates	*	39.6	0	M+FA-H	H2NaO4P	-0.982985	1.58037	0.000806968	0.00850306	0.759426	1.69282	24413.7	14421.9	22138.8	20550.7	26202.5	29975	28524.2	26389	17115.7	10005.4	14392.2	17072.2	10475.3	20878.5	13631.9	14498
2.60_192.9908m/z	192.991	2.6045	pos	N-methylethanolamine phosphate	HMDB0304429						Organic acids and derivatives	Organic phosphoric acids and derivatives	Phosphate esters	*	38.4	0	M+K	C3H9NO4P-	4.96835	1.56727	0.00879642	0.0319397	-1.6529	0.318001	5447.07	17129.1	4710.81	7206.95	2711.9	1217.85	5640.22	7765.45	8876.32	34543.7	9564.04	15067.2	21391.9	5885.31	12749.6	20701.9
0.79_290.1236m/z	290.124	0.787683	pos	Arbutin	HMDB0029943	43989		C06186	440936	497-76-7	Organic oxygen compounds	Organooxygen compounds	Carbohydrates and carbohydrate conjugates	*	45.1	39.9	M+NH4	C12H16O7	0.718136	1.56692	0.00046085	0.00620493	-2.55558	0.170096	1994.43	11725.3	372.275	2219.93	321.393	2.41397e-06	927.54	1823.75	8296.13	16506.2	11547.6	5771.08	13969.2	5066.82	14084.1	15132.2
0.71_350.0847m/z	350.085	0.708033	pos	Acetaminophen glucuronide	HMDB0010316				83944	16110-10-4	Organic oxygen compounds	Organooxygen compounds	Carbohydrates and carbohydrate conjugates	*	37.4	0	M+Na	C14H17NO8	0.301465	1.56533	0.000817124	0.00854561	-1.77615	0.291962	3806.15	13036.5	2.41397e-06	8070.3	1433.09	2.41397e-06	5933.5	1535.04	9671.15	13516.5	14122.7	18945.4	10790.4	15976.4	9916.81	7987.25
4.16_130.1593m/z	130.159	4.15805	pos	(Z)-2-Octene	HMDB0061903				5356796		Hydrocarbons	Unsaturated hydrocarbons	Unsaturated aliphatic hydrocarbons	*	40.9	9.06	M+NH4	C8H16	2.62526	1.56233	0.000584786	0.00700779	1.30618	2.47286	16518.7	6679.99	17482.7	14333.3	11132.7	17055	12525.1	24995.2	18106.7	5834.53	5820.08	7032.07	13819	4284.26	5569	4401.04
4.71_209.0187m/z	209.019	4.70845	pos	1-Iodoheptane	HMDB0243907	349466			20274		Organohalogen compounds	Organoiodides	Unclassified	*	39.4	0	M+H-H2O	C7H15I	0.630944	1.55605	0.0133104	0.0414134	-1.79535	0.288101	4860.92	16872.3	3838.74	6974.51	2269.48	198.234	3390.88	7715.15	9639.43	35325.2	9297.35	11644.6	22542.2	4636.46	12556.4	22103.5
0.82_232.0526n	277.054	0.816917	neg	1,8-Pyrenedione		345564		C18251	16820	6217-22-7	Unclassified	Unclassified	Unclassified	*	37.9	0	M-H, M+FA-H	C16H8O2	0.594066	1.54945	0.000128906	0.00303731	3.10218	8.58716	11053.7	1287.23	7483.32	14584.3	11807.3	7733.38	19063.2	6538.86	10165.4	17.8548	631.423	899.692	3300.41	2645.86	744.55	770.85
11.71_338.2459n	361.235	11.7109	pos	Sterebin E	HMDB0035379	90675				114343-74-7	Lipids and lipid-like molecules	Prenol lipids	Diterpenoids	*	47.5	44.4	M+H, M+Na, M+H-H2O	C20H34O4	0.707419	1.54944	0.00178804	0.0132778	-1.94867	0.259056	3905.51	15075.9	4864.41	2364.22	3709.06	4941.24	2590.99	3972.4	4896.23	25128.8	23109.4	8033.92	10403.6	7538.97	11965.4	19351.5
14.62_309.2797m/z	309.28	14.6245	neg	11Z-Eicosenoic acid	HMDB0002231	6563	LMFA01030085	C16526	5282768	5561-99-9	Lipids and lipid-like molecules	Fatty Acyls	Fatty acids and conjugates	*	41.9	14.2	M-H	C20H38O2	-0.519448	1.54838	0.0240937	0.0617894	-0.843014	0.557478	15151.6	27178.9	12421.3	15086.8	8113.68	5346.16	16323.5	16022.2	32747.7	41954.4	26197	14478.1	31166.4	21074.6	25093.1	30288.6
0.73_276.1192m/z	276.119	0.72705	pos	N2-gamma-Glutamylglutamine	HMDB0011738	62461		C05283	150914	10148-81-9	Organic acids and derivatives	Carboxylic acids and derivatives	Amino acids, peptides, and analogues	***	58.1	67.5	M+H	C10H17N3O6	0.604668	1.54263	0.0429908	0.0923036	0.791261	1.73059	38404.3	22191.5	37262.4	38859.1	32125.8	15940.1	34101.4	47129.7	63411.8	15256	16593.7	16315.1	49089.8	16571	17817.6	23697.3
0.69_232.0671n	213.049	0.690683	neg	Metsulfovax [ISO]		452904		C18934	88916	21452-18-6	Unclassified	Unclassified	Unclassified	*	36.8	0	M-H2O-H, M-H	C12H12N2OS	0.177285	1.54256	0.00656388	0.0266476	1.03392	2.04758	20212.4	9871.38	22149.7	14666.2	13759	27666.4	30883.1	20053.9	12308.5	6528.49	11035.3	16609.8	5656.83	6830.2	14418.6	8020.47
10.10_260.2141n	278.248	10.1049	pos	6-[1]-ladderane hexanol			LMFA01140088		137323827		Lipids and lipid-like molecules	Fatty Acyls	Fatty Acids and Conjugates	*	47.1	40.1	M+H, M+NH4	C18H28O	0.329186	1.53245	0.000635856	0.00737172	0.75428	1.68679	24127.6	14303.8	20898	18710.5	17332.3	26326.7	25413.1	30958.3	29254.1	11759.7	13481.5	13244.8	15971.1	18080.4	12726.5	14862.9
11.31_198.0174m/z	198.017	11.3062	pos	1,N6-Ethenoadenine	HMDB0244259	424740			104994		Organoheterocyclic compounds	Imidazopyrimidines	Purines and purine derivatives	*	38.2	0	M+K	C7H5N5	-1.90549	1.53046	0.0115429	0.0377816	0.438022	1.35475	42446.2	31331.5	42735.3	38330.9	38447.4	55686.8	42622.7	44110	35190	26416.1	34088.3	39674.3	23178.1	42008.6	26032.1	27922.8
11.50_484.4364m/z	484.436	11.502	pos	19-Methylhenicosanoylcarnitine	HMDB0240930						Lipids and lipid-like molecules	Fatty Acyls	Fatty acid esters	*	38.4	0	M+H	C29H57NO4	0.706136	1.52498	0.00361231	0.019106	1.62572	3.08597	14643.5	4745.19	21431.8	16897.9	21886.9	3527.56	16542.4	14343.7	7874.32	3099.1	5695.64	1898.4	6497.27	1957.57	8888.99	5179.35
9.51_493.2276m/z	493.228	9.50793	pos	Tfa-VAL-TYR-VAL-OH		44312			40785040	64577-63-5	Unclassified	Unclassified	Unclassified	*	39.1	0	M+NH4	C21H28F3N3O6	1.58488	1.51821	2.42472e-05	0.00111256	-31.6391	2.99003e-10	2.41397e-06	8073.41	2.41397e-06	2.41397e-06	2.41397e-06	2.41397e-06	2.41397e-06	2.41397e-06	2.41397e-06	3570.83	6644.34	10844.6	9670.83	11792.1	9598.72	4392.43
6.37_182.1308n	200.165	6.3684	pos	8-undecynoic acid		74272	LMFA01030616		5312735		Lipids and lipid-like molecules	Fatty Acyls	Fatty Acids and Conjugates	*	41.1	10	M+H, M+NH4, M+H-H2O	C11H18O2	0.930633	1.5174	0.0045188	0.0215803	0.563346	1.47769	31870.1	21567.5	30471.4	27108.1	29558.4	47321.6	30391.4	31393	26847	19196.2	20654.1	25047.1	19190.9	27460.1	18095.3	21328.8
1.11_186.1006n	187.108	1.11178	pos	Alanylproline	HMDB0028695	85610			83525	13485-59-1	Organic acids and derivatives	Carboxylic acids and derivatives	Amino acids, peptides, and analogues	*	45	31	M+H-H2O, M+H	C8H14N2O3	0.931281	1.50911	4.17858e-05	0.00152742	-1.73895	0.299588	3497.97	11675.9	3260.26	4558.18	2370.63	1371.31	3745.07	4258.64	4921.7	11019.9	9466.82	11708.5	16841.5	7810.3	15076.6	9807.76
0.59_510.2390m/z	510.239	0.58995	pos	2-O-Methyl-D-xylose	HMDB0033821	89552			560157	7434-28-8	Organic oxygen compounds	Organooxygen compounds	Carbohydrates and carbohydrate conjugates	*	38.5	0	M+NH4	C18H36O15	-0.472873	1.50202	0.0303606	0.072584	0.817013	1.76176	26791.8	15207.4	30141	18768.9	22343.8	46575.3	16376.6	32516.2	20820.8	5055.98	15844.8	26051.2	10821.1	20549.1	14663.4	13466.6
1.22_321.1538n	339.193	1.22138	pos	6'-Dehydro-6'-oxoparomamine		71792		C17583	46173949		Unclassified	Unclassified	Unclassified	*	37.5	0	M+H-H2O, M+NH4	C12H23N3O7	0.766887	1.49985	0.00865114	0.0315766	-1.58493	0.333342	5166.87	15500.2	5095.32	9260.62	5391.24	1901.82	4645.88	6205.83	3667.38	23150.8	12938.1	13281.1	29688.9	5047.16	15628	8767.45
0.73_555.1191m/z	555.119	0.730267	neg	D-Erythroascorbic acid 1'-a-D-xylopyranoside	HMDB0033626	89426			131751465	174339-85-6	Organic oxygen compounds	Organooxygen compounds	Carbohydrates and carbohydrate conjugates	*	37.6	0	2M-H	C10H14O9	-2.18081	1.49977	0.00102002	0.00976287	1.74937	3.36213	12718.8	3782.97	17127.7	17968.1	12746.5	11645.6	2208.88	13557.1	13777.9	4890.18	5920.97	1971.08	4889.73	1724.6	1848.05	5236.18
14.53_296.2584m/z	296.258	14.5264	pos	10,12,15-octadecatrienoic acid		34826	LMFA01030156		5282824		Lipids and lipid-like molecules	Fatty Acyls	Fatty Acids and Conjugates	*	46.7	47.2	M+NH4	C18H30O2	0.140433	1.49955	0.00148286	0.0119977	0.563285	1.47763	27624.7	18695.3	28170.8	26656.5	26074	32048.1	30232.6	27575	22615.9	17707.6	19110.6	22880.8	9004.31	23877.9	17615.8	20670
0.75_247.0578m/z	247.058	0.745533	pos	Ethyl beta-D-fructofuranoside	HMDB0303035						Organic oxygen compounds	Organooxygen compounds	Carbohydrates and carbohydrate conjugates	*	46.5	38	M+K	C8H16O6	-0.338433	1.4973	0.0080744	0.0302439	-1.30682	0.404212	8391.22	20759.5	9665.14	6103.29	6787.73	17151.2	3778.26	9354.98	5897.92	31393.5	32378	12068.7	14379.7	9537.96	19138.1	26420.4
1.11_188.0919m/z	188.092	1.11178	pos	N-(3-hydroxy-butanoyl)-homoserine lactone			LMFA08030029		10330086		Lipids and lipid-like molecules	Fatty Acyls	Fatty amides	*	45.3	31.6	M+H	C8H13NO4	1.01229	1.49521	0.000959582	0.00944191	-3.03599	0.12192	1341.85	11006	1152.41	1642.67	811.983	533.712	439.037	1943.47	2869.65	19298	15713.5	6147.93	12219	2167.32	8589.07	12906.9
3.16_187.0942m/z	187.094	3.15513	pos	Triethylene Glycol Monomethyl Ether	HMDB0062666				8178	112-35-6	Organic oxygen compounds	Organooxygen compounds	Ethers	*	39.8	0.716	M+Na	C7H16O4	0.707162	1.49033	0.0135808	0.042022	0.58903	1.50423	28237.5	18772	28071.8	30087	30383.2	27902.2	27136	34548	19534.3	17287.9	22697.9	26417.4	8705.45	13356.5	14245.4	28693.5
7.10_431.1783m/z	431.178	7.10393	pos	EGFR Inhibitor	HMDB0251716				9549299		Benzenoids	Benzene and substituted derivatives	Trifluoromethylbenzenes	*	37.5	0	M+NH4	C21H18F3N5O	-4.41018	1.4889	0.0133834	0.0415587	0.397946	1.31763	43636.2	33117.2	40667.8	45072.9	35835.4	58625.7	48429.3	39784.6	37037.7	36608.4	34259.3	34149.9	26118.3	36080.4	25158.6	39445.3
12.87_397.2357m/z	397.236	12.8712	neg	Alfentanil	HMDB0014940	844		C08005	51263	71195-58-9	Benzenoids	Benzene and substituted derivatives	Anilides	*	39.2	0.035	M-H2O-H	C21H32N6O3	-0.117669	1.48883	0.00199951	0.0140559	-1.23138	0.425911	6937.23	16288	10274.2	3620.37	4590.62	1936.54	6399.46	9822.71	11916.8	20305.5	11383.6	11803.5	22310.3	15324.9	11238.8	21649.3
0.65_241.0918m/z	241.092	0.646067	neg	D-erythro-D-galacto-octitol	HMDB0029953	86611			219890	27655-86-3	Organic oxygen compounds	Organooxygen compounds	Carbohydrates and carbohydrate conjugates	*	37.1	0	M-H	C8H18O8	-4.49198	1.48445	0.000895601	0.00906835	0.567753	1.48221	29189.2	19693	31221.9	25483.9	35669.9	19427.6	33772	29946.8	28802.6	19303.6	19294.9	19452.8	21395	22843	17706.1	17855.8
0.84_306.0756n	611.144	0.838583	neg	Mesquitol-4beta-ol		47407	LMPK12020191		44257148		Lipids and lipid-like molecules	Polyketides	Flavonoids	*	37.1	0	M+FA-H, 2M-H	C15H14O7	5.26834	1.48215	0.0111743	0.0369777	2.31702	4.983	13455.3	2700.25	6991.74	9614.54	20414.6	29273.7	17776.6	5745.36	4370.74	2.41397e-06	6079.91	2096.36	1198.5	3936.6	1576.32	4014.03
12.84_356.2928n	339.289	12.8415	pos	MG(0:0/18:1(11Z)/0:0)	HMDB0011536	62320			53480961		Lipids and lipid-like molecules	Glycerolipids	Monoradylglycerols	***	69	77.7	M+H-H2O, M+H	C21H40O4	0.322558	1.48096	0.00525286	0.0234092	-2.43408	0.185042	2274.09	12289.6	1968.42	2021.67	1050.39	446.85	1582.66	1646.03	7202.59	26201.5	14118.7	4946.27	15002.4	4060.24	9456.59	12241.4
1.11_633.1265m/z	633.126	1.1114	neg	Kolaflavanone		47515	LMPK12040002	C09761	155169		Lipids and lipid-like molecules	Polyketides	Flavonoids	*	40.3	14	M+FA-H	C31H24O12	2.50881	1.48016	0.0139848	0.0428789	2.89352	7.43081	12229.1	1645.72	9506.88	6228.02	16075.8	30931.6	13907.3	7924.42	1029.41	2.41397e-06	3399.52	1501.33	2.41397e-06	3774.56	529.099	2315.56
1.11_202.1320n	203.139	1.11178	pos	Isoleucyl-Alanine	HMDB0028900	85806			5246009		Organic acids and derivatives	Carboxylic acids and derivatives	Amino acids, peptides, and analogues	*	45.6	33.8	M+H-H2O, M+H	C9H18N2O3	1.24601	1.47992	5.13329e-05	0.00173051	-1.18443	0.44	6088.44	13837.4	6604.84	5009.02	3974.02	3693.96	5793.82	6216.96	11326.4	18343.2	11578.1	13607.5	14250.6	13348.3	13243	12490.7
12.58_254.2244n	253.217	12.5799	neg	Palmitoleic acid	HMDB0003229	188	LMFA01030056	C08362	445638	373-49-9	Lipids and lipid-like molecules	Fatty Acyls	Fatty acids and conjugates	***	55.2	43.1	M-H, M+FA-H	C16H30O2	-0.593225	1.47835	0.00191553	0.0137502	-1.53992	0.343904	5097.44	14822.3	6312.69	2688	4189.95	2318.98	3857.52	6247.74	10067.2	23685.8	15743.4	7175.65	14284	7663.92	15887.5	19315.5
10.59_337.1676m/z	337.168	10.5885	pos	Geissoschizoline		67507		C09197	442095	18397-07-4	Unclassified	Unclassified	Unclassified	*	39.4	0	M+K	C19H26N2O	-0.154699	1.4752	2.61658e-05	0.0011659	-6.56496	0.0105621	82.7399	7833.67	107.722	126.393	2.41397e-06	27.6099	4.87996	113.67	198.904	4188.83	8312.49	12477.8	7630.92	10711.6	7522.2	3991.76
14.57_158.0965m/z	158.097	14.5746	pos	Norcapillene		71907		C17796	10983572		Unclassified	Unclassified	Unclassified	*	39.3	0	M+NH4	C11H8	0.63185	1.47366	0.0411456	0.0894866	0.298961	1.23026	68313.6	55527.9	64999.1	64505.7	62700	92555.6	65612.6	69803.7	58018.5	49718.6	51538.8	65939	50542.2	72501.1	48224.3	50231
5.32_242.0805n	243.088	5.31515	pos	Lumichrome	HMDB0254199	64742		C01727	506	1086-80-2	Organoheterocyclic compounds	Pteridines and derivatives	Alloxazines and isoalloxazines	***	56.7	68.8	M+H, M+Na	C12H10N4O2	0.514597	1.4703	3.91762e-05	0.00146894	1.00545	2.00757	17077.5	8506.59	14501.9	21190.6	16126.1	13161.9	21228.6	15634.5	17699	8178.81	6443.67	9708.8	9600.35	11250.7	7377.67	6986.12
0.69_714.1653m/z	714.165	0.690683	neg	N(omega)-(ADP-D-ribosyl)-L-arginine		65569		C01201	46173712		Unclassified	Unclassified	Unclassified	*	38.2	0	M-H	C21H35N9O15P2	-0.250325	1.46798	0.0013512	0.0114368	2.60267	6.07409	10688.2	1759.63	9825.8	12335.7	12905	1821.27	18388.9	13899.4	5641.17	2.41397e-06	3422.17	2913.13	393.67	2141.14	3008.76	438.571
0.69_190.0955n	229.059	0.69025	pos	Diaminopimelic acid	HMDB0001370	352	LMFA01170102	C00666	439283	583-93-7	Organic acids and derivatives	Carboxylic acids and derivatives	Amino acids, peptides, and analogues	**	42.3	17.2	M+H, M+K	C7H14N2O4	0.791509	1.46112	1.03026e-06	0.00020888	1.57785	2.98525	11496.3	3851.02	11379.1	13366.1	10620.2	8213	13585.9	10758.1	12551.3	2365.9	3147.22	5268.12	3758.27	4886.12	4996	2535.49
0.73_245.0429m/z	245.043	0.730267	neg	Glycerophosphoglycerol	HMDB0240316				54575349	185615-51-4	Organic acids and derivatives	Organic phosphoric acids and derivatives	Phosphate esters	*	53.6	71.2	M-H	C6H15O8P	-0.980841	1.45883	0.0394371	0.0868761	-0.784016	0.580748	21314.3	36701.4	26562	16158.6	24788.7	32694.3	14367.4	18281.2	16347.8	46365.1	60129.3	19992.7	23996.8	17886.4	40180.6	48359.1
7.50_435.1674m/z	435.167	7.49575	pos	BM 567		45387			9866368	284464-77-3	Unclassified	Unclassified	Unclassified	*	37.8	0	M+Na	C18H28N4O5S	0.24506	1.45843	0.00163733	0.0126938	-31.7167	2.83344e-10	2.41397e-06	8519.6	2.41397e-06	2.41397e-06	2.41397e-06	2.41397e-06	2.41397e-06	2.41397e-06	2.41397e-06	2181.23	4470.66	15726.9	8492.29	14947.8	10889.5	2928.84
5.33_225.1366n	248.126	5.33093	pos	Prenalterol	HMDB0256762						Benzenoids	Phenols	4-alkoxyphenols	*	39.1	0	M+Na, M+K, M+H	C12H19NO3	0.286983	1.45761	0.000464999	0.00623192	0.872749	1.83115	18558.5	10134.9	16584.7	15281.9	18013.7	28414.2	16710.1	18364.2	16540.5	9813.63	9593.99	10585.1	8840.06	12741.2	8560.61	10809.6
0.61_265.1759m/z	265.176	0.609217	pos	3-Hydroxybutyrylcarnitine	HMDB0013127					1469900-92-2	Lipids and lipid-like molecules	Fatty Acyls	Fatty acid esters	*	38.6	0	M+NH4	C11H21NO5	0.525792	1.45656	0.00621005	0.0258234	1.63427	3.10431	15281.8	4922.79	9574.44	16738.9	14921.9	12739	30970.1	10976.4	11052.3	1566.93	7058.56	1972.88	9843.03	1578.89	9679.64	2759.58
10.20_348.1916n	349.199	10.1953	pos	Gibberellin A53	HMDB0036895	327926	LMPR0104170007	C06094	440914	51576-08-0	Lipids and lipid-like molecules	Prenol lipids	Diterpenoids	*	38.3	3.8	M+H, M+Na	C20H28O5	-5.94044	1.45651	0.0227294	0.0593012	-0.885297	0.541376	12878.8	23789	12372.9	12385.6	11659.3	2999.36	8964.55	22619.8	19149.8	31374.6	18677.9	13403.2	37879	18929.1	17244.9	29014.2
4.94_182.1904m/z	182.19	4.94295	pos	Dicyclohexylamine	HMDB0251214	70260		C14686	7582	101-83-7	Organic nitrogen compounds	Organonitrogen compounds	Cyclohexylamines	*	41.8	11.8	M+H	C12H23N	0.653136	1.45627	0.00103705	0.00985361	0.869488	1.82701	18831.3	10307.1	18536.4	17988.3	16839.8	28445.9	15780.6	19117.1	15110.9	7708.68	11638.7	13064.5	9227.12	13767.5	6362.9	10380.4
9.86_828.4084n	851.398	9.8555	pos	Digitoxigenin 3-[glucosyl-(1->6)-glucosyl-(1->4)-2,6-dideoxyribohexoside]	HMDB0034321	89845			75072220	220710-06-5	Lipids and lipid-like molecules	Steroids and steroid derivatives	Steroid lactones	*	37.6	0	M+Na, M+K	C41H64O17	-7.16175	1.45379	0.0240691	0.0617706	0.845545	1.79694	28084.7	15629.1	18978.6	19509.4	23627.5	40561.9	50551.9	18055	25308.3	14070.4	15182.1	15239.9	17680	19084.4	16259	11888.2
7.08_243.1835n	226.18	7.08148	pos	N-Undecanoylglycine	HMDB0013286	331610			454092		Organic acids and derivatives	Carboxylic acids and derivatives	Amino acids, peptides, and analogues	*	44.6	26.8	M+H-H2O, M+H, M+Na	C13H25NO3	0.3386	1.45373	0.0250813	0.0635451	0.334825	1.26122	53928.4	42758.7	54712.1	51550.3	45189.6	74324.3	58069.3	48192.9	45460.1	43489.4	44277.4	48039.1	38363.9	50420.1	34788.5	39932.6
1.29_397.0361m/z	397.036	1.28923	neg	Sodium erythorbate	HMDB0303702				76171925		Organoheterocyclic compounds	Dihydrofurans	Furanones	*	38.6	0	2M-H	C6H8NaO6+	-0.941721	1.44869	0.0242789	0.0621131	0.763725	1.69787	26057.9	15347.4	31032.4	17056.6	39082.6	25791.7	33317.9	23435.7	12688.2	8368.93	21176.4	15963.1	12156.5	17909.2	23405.8	8451.88
8.57_225.1057m/z	225.106	8.57337	pos	Thiopental	HMDB0014737	2833		C07521	3000715	76-75-5	Organoheterocyclic compounds	Diazines	Pyrimidines and pyrimidine derivatives	*	39	0.42	M+H-H2O	C11H18N2O2S	0.369816	1.43658	0.0104467	0.0354789	-2.82876	0.140753	1549.23	11006.7	2478.8	612.254	1954.02	2638.18	785.65	1697.25	678.451	2600.67	5453.4	23420.9	10454	20584.7	11062.3	3470.84
5.85_197.1417n	220.131	5.8544	pos	Estreptoquinasa	HMDB0258508						Organic acids and derivatives	Carboxylic acids and derivatives	Amino acids, peptides, and analogues	*	41.8	12.5	M+Na, M+K, M+H	C11H19NO2	0.527271	1.42422	0.0247084	0.0628651	0.507391	1.42148	35345.5	24865.3	32826.5	33280.1	28097.6	56738.1	34325.5	33761.7	28389.1	20071.5	26891.4	26979.4	19778.7	32858.6	22361	25116.8
0.65_205.1548m/z	205.155	0.648267	pos	1-Hydroxy-2,2,5,5-tetramethylpyrrolidine-3-carboxylic acid	HMDB0243895				92169		Organoheterocyclic compounds	Pyrrolidines	Pyrrolidine carboxylic acids and derivatives	*	45.8	32.5	M+NH4	C9H17NO3	0.623561	1.41594	0.00143261	0.0117493	0.643296	1.56189	24077.2	15415.4	25593.8	19617.7	29422.9	30242.7	24344.7	19701.7	19616.9	13719.8	14215.3	19927.7	14778.3	19750.7	13054.1	12461.7
0.75_402.9948m/z	402.995	0.7523	neg	Uridine 5'-diphosphate	HMDB0000295			C00015	6031	58-98-0	Nucleosides, nucleotides, and analogues	Pyrimidine nucleotides	Pyrimidine ribonucleotides	***	46.5	34.5	M-H	C9H14N2O12P2	-0.362605	1.41532	0.0121605	0.0389584	3.84267	14.347	10414.2	725.879	7959.13	2837.06	16623.6	26301.2	10796.9	7371.74	1009.48	519.845	477.35	1175.04	410.361	1262.23	978.509	257.816
10.10_491.3614n	474.358	10.1049	pos	11-{3,4-Dimethyl-5-[(1E)-pent-1-en-1-yl]furan-2-yl}undecanoylcarnitine	HMDB0241833						Lipids and lipid-like molecules	Fatty Acyls	Fatty acid esters	*	41	9.75	M+H-H2O, M+K	C29H49NO5	0.622785	1.41356	0.019849	0.0541118	2.13592	4.39516	14384.5	3272.8	12809.3	9626.57	10440.3	3461.75	37798.8	11624	14930.8	3216.22	2952.66	2409.99	3418.25	3627.96	4607.97	2676.56
10.97_381.1130m/z	381.113	10.9693	neg	Lophirone J		52539	LMPK12140049		42607816		Lipids and lipid-like molecules	Polyketides	Flavonoids	*	38.7	0	M-H2O-H	C25H20O5	-0.485247	1.41266	1.0418e-05	0.000680328	1.11206	2.16155	13106.7	6063.58	13105.5	13866.6	13361.7	13473.2	14147.9	14205.5	9586.6	3744.41	6205.5	7408.21	4326.12	9741.73	5612.87	5406.22
11.31_558.3533m/z	558.353	11.3062	pos	PC(O-16:0/3:1(2E))		40097	LMGP01020070		195806		Lipids and lipid-like molecules	Glycerophospholipids	Glycerophosphocholines	*	38.2	0	M+Na	C27H54NO7P	0.470535	1.41236	0.0046795	0.0219687	-3.67858	0.0780974	797.743	10214.7	2.41397e-06	705.214	568.063	2444.6	2.41397e-06	129.766	1736.56	22499	10638.6	2523.93	11610.7	1532.21	8627.15	14071.3
0.71_163.1159m/z	163.116	0.708033	pos	(S1)-Methoxy-3-heptanethiol	HMDB0032380	88407			12009861	400052-49-5	Organic oxygen compounds	Organooxygen compounds	Ethers	*	37.2	0	M+H	C8H18OS	4.67273	1.41207	0.00521292	0.0233237	0.48458	1.39918	34122.7	24387.7	32947.4	32871.1	25779.3	33551.1	38074.8	37574.9	38060.4	21355.7	20776.8	31714.2	19714.5	34760.9	20335.4	22056.3
1.00_773.0583m/z	773.058	0.997533	neg	Thifensulfuron-methyl	HMDB0258993	68721		C10957	73674	79277-27-3	Organoheterocyclic compounds	Thiophenes	Thiophene carboxylic acids and derivatives	*	36.1	0	2M-H	C12H13N5O6S2	5.37145	1.41205	0.000148829	0.00329254	2.10189	4.2927	9845.67	2293.58	11076.4	13526.3	10018.6	5766.23	13047.9	9072.24	6412.05	2.41397e-06	3896.14	4004.55	238.744	4522.4	3393.25	2.41397e-06
9.10_318.2196n	336.251	9.10198	pos	Ineketone	HMDB0036698	67434		C09110	5088400	62574-18-9	Lipids and lipid-like molecules	Prenol lipids	Diterpenoids	*	41.4	14.1	M+H, M+NH4, M+H-H2O	C20H30O3	0.279378	1.40868	0.00419443	0.020636	0.398489	1.31813	37747.1	28636.9	35360.6	35357.3	33379.4	48052.6	37343.4	36887.9	37848.5	25321.5	25674.2	31242.8	26138.1	36074.3	22797.5	33210.3
0.83_188.0919m/z	188.092	0.82825	pos	3,4-Dihydroxyphenylglycol	HMDB0000318	5307		C05576	91528	28822-73-3	Benzenoids	Phenols	Benzenediols	**	41.4	13.3	M+NH4	C8H10O4	1.182	1.40774	0.00588337	0.0250257	-1.90499	0.267018	3461.41	12963.2	3618.66	4582.94	3158.95	2189.51	2042.73	4333.58	4303.47	24286.2	13257.7	6046.17	17921.6	2982.86	9064.23	17183.4
0.54_160.1809m/z	160.181	0.53645	pos	1-Methylspermidine	HMDB0243947				132108		Organic nitrogen compounds	Organonitrogen compounds	Amines	*	39.2	0	M+H	C8H21N3	0.588086	1.40253	0.00150418	0.0121085	-1.65069	0.318488	3791.91	11906	4531.7	1406.23	2540.24	1515.67	4403.02	8652.58	3493.96	14811.1	11217.5	13976.5	19845	7749.34	8947.91	6794.45
1.77_541.2786m/z	541.279	1.76783	pos	Annomuricatin A	HMDB0303181				72981537		Organic acids and derivatives	Carboxylic acids and derivatives	Amino acids, peptides, and analogues	*	43.8	33.1	M+H-H2O	C27H38N6O7	3.05298	1.3984	0.0227033	0.0592687	1.51656	2.86109	16240.3	5676.28	18774.9	11426.7	7368.91	33809	19352	12392	10558.9	589.553	2767.46	12827.1	4937.95	15325.1	2498.04	788.698
10.82_590.3462m/z	590.346	10.8168	neg	LysoPC(20:3(5Z,8Z,11Z)/0:0)	HMDB0010393	61703	LMGP01050139	C04230	53480467	1199257-41-4	Lipids and lipid-like molecules	Glycerophospholipids	Glycerophosphocholines	***	70.5	94.8	M+FA-H	C28H52NO7P	-0.287455	1.38928	0.0192304	0.0529995	-1.4425	0.367929	5616.32	15264.7	725.492	6449.84	2124.36	15270.4	7815.12	526.959	6402.06	26573.6	12562.2	7224.07	20562.4	7067.16	22606	10257.2
1.58_398.1185n	795.23	1.57638	neg	Picraquassioside A	HMDB0041285	95699			85502992	169312-28-1	Organic oxygen compounds	Organooxygen compounds	Carbohydrates and carbohydrate conjugates	*	37.8	0	M-H, 2M-H	C18H22O10	-6.95443	1.38346	0.0389605	0.0862714	0.901269	1.86771	22136.8	11852.4	11679.7	23955.7	22328.7	16906.2	19511.8	41488.5	19087.2	4826.52	19911.8	23253.1	6167.39	8272.43	9240.42	11295.2
15.08_580.4944m/z	580.494	15.0834	neg	Cer(d16:2(4E,6E)/18:0)		102965	LMSP02010062		70698949		Lipids and lipid-like molecules	Sphingolipids	Ceramides	*	39.4	0	M+FA-H	C34H65NO3	-0.429492	1.38222	0.04485	0.0950304	0.879722	1.84002	25058.9	13618.8	31326	19673.8	29262.4	36372	13248.8	27874.8	17654.8	7656.51	7780.3	9380.31	11073.2	37522.5	10526.8	11392.3
12.53_329.2393m/z	329.239	12.5267	neg	1-Cyclohexyl-4-(1,2-diphenylethyl)piperazine	HMDB0254934				431865		Phenylpropanoids and polyketides	Stilbenes	Unclassified	*	36.1	0	M-H2O-H	C24H32N2	1.81667	1.38106	0.000948195	0.00938826	-1.05798	0.480303	7114.09	14811.7	10380.7	3684.77	4944.94	2858.26	7629.91	10141.5	10158.6	17866.7	12473.2	12184.5	19779.2	15133.6	10338.6	15906
0.71_130.0461n	131.053	0.708033	pos	S-2-Propenyl propanethioate	HMDB0037493	92371			61995	41820-22-8	Organic acids and derivatives	Thiocarboxylic acids and derivatives	Thioesters	*	37.2	0	M+H, M+NH4	C6H10OS	6.66314	1.3804	0.0307769	0.0732796	0.308584	1.23849	53882.2	43506.3	63491.2	54006.7	45720.9	57013.1	58444.3	53120.5	45378.5	45781.9	41471.6	35311.7	62206.9	38787.6	36870.4	44113.8
8.72_210.1159n	233.105	8.71682	pos	N-ethyl phenazine	HMDB0255130				15309770		Organoheterocyclic compounds	Diazanaphthalenes	Benzodiazines	*	39	0	M+NH4, M+Na, M+H	C14H14N2	1.08663	1.37541	0.00114626	0.0104421	-14.0894	5.73661e-05	0.421729	7351.53	0.19466	0.186331	0.195623	0.0496337	0.297273	0.0191179	2.00946	2089.54	3922.25	12822.7	9136.96	13325.4	7038.05	3125.79
6.41_179.1077m/z	179.108	6.41138	neg	4-(4-Methylcyclohexyl)-4-oxobutanoic acid	HMDB0253742				6919096		Organic acids and derivatives	Keto acids and derivatives	Gamma-keto acids and derivatives	*	45.4	29.3	M-H2O-H	C11H18O3	-0.297965	1.37249	0.018233	0.0511603	-0.991203	0.503058	8829.61	17551.9	6246.13	19291	5002.69	330.363	5665.69	8888.11	16383.4	18994.1	10080.3	20720.6	25982	13589.8	17830.6	15665.6
10.32_249.1851m/z	249.185	10.3194	pos	(9R,13R)-1a,1b-dinor-10,11-dihydro-12-oxo-15-phytoenoic acid		36060	LMFA02010008		5716901		Lipids and lipid-like molecules	Fatty Acyls	Octadecanoids	*	53.7	74.5	M+H-H2O	C16H26O3	0.567881	1.37152	0.00108201	0.010099	0.644464	1.56316	20726.6	13259.4	22167.8	15833.1	19530.8	26150.9	20381.5	23538.3	17484	12124.9	15147.3	16353.2	10378.6	17205.4	9690.19	11916.6
10.81_387.0988n	410.088	10.8133	pos	Pyraclostrobin	HMDB0256940	72366		C18561	6422843	175013-18-0	Organoheterocyclic compounds	Azoles	Pyrazoles	*	49.1	59.1	M+H, M+Na	C19H18ClN3O4	0.593407	1.37029	0.0266851	0.0663835	2.23326	4.70196	12056.8	2564.2	11340.6	5856.74	9791.9	33706.3	8513.94	9202.02	5985.85	2046.95	5669.5	2067.85	542.767	1672.85	963.305	4986.16
9.21_379.2488m/z	379.249	9.2077	neg	Asterogenol		84301	LMST02030211		3086044		Lipids and lipid-like molecules	Steroids and steroid derivatives	Steroids	*	46.3	40.1	M+FA-H	C21H34O3	-0.607876	1.36927	0.0292225	0.0705625	-1.50848	0.351482	4999.37	14223.7	4560.44	12287.1	732.481	2.41397e-06	1548.1	5131.35	10736.2	27258.2	5560.32	13975.5	25204.7	8875.59	9699.26	8992.18
11.79_662.3649m/z	662.365	11.7894	neg	PKODiA-PC		44814	LMGP20010013	C13900	91885957	439904-33-3	Lipids and lipid-like molecules	Glycerophospholipids	Oxidized glycerophospholipids	*	37.4	0	M-H	C32H58NO11P	-3.90371	1.36755	0.0032058	0.0178611	-1.48329	0.357673	4802.06	13425.8	4678.49	3649.24	3663.98	8948.9	1684.82	3292.2	7696.79	23148.5	15899.8	7063.08	12386	7998.86	10595.9	16888.7
1.00_427.0231m/z	427.023	0.997533	neg	Niridazole	HMDB0255625	72986		C19268	6093	61-57-4	Organoheterocyclic compounds	Azoles	Thiazoles	*	37.9	0	2M-H	C6H6N4O3S	-4.12263	1.36697	0.00285051	0.01683	1.56905	2.9671	12397.7	4178.38	16119.1	10646.4	11928.8	14152.5	15502.1	12264.2	6170.77	550.043	1135.78	7740.59	1633.53	13217.9	4184.15	786.663
2.58_282.9868m/z	282.987	2.58245	neg	Malathion monocarboxylic acid	HMDB0060626				3032927		Lipids and lipid-like molecules	Fatty Acyls	Fatty acids and conjugates	*	37.4	0	M-H2O-H	C8H15O6PS2	-0.407652	1.36669	0.0024446	0.0155335	-1.93742	0.261083	2877.2	11020.2	2373.05	4221.1	1276.57	2.41397e-06	3165.94	4545.62	4558.13	20765.6	7001.2	11105.4	12481.6	3680.63	9435.79	12671.5
12.62_311.2561m/z	311.256	12.6183	pos	METHOPRENE (S)		44012		C14308	1711973	40596-69-8	Unclassified	Unclassified	Unclassified	*	48.9	58.5	M+H	C19H34O3	-6.45579	1.36538	0.0114699	0.037578	0.495066	1.40939	30819	21867	30295.6	23863.3	26337.2	46170.1	28644	29827.2	30595.6	25147.3	19554.5	21332.1	16953.9	25229.2	19579.5	25272.4
9.56_300.2899m/z	300.29	9.56077	pos	Phytosphingosine	HMDB0004610	7066	LMSP01030001	C12144	122121	554-62-1	Organic nitrogen compounds	Organonitrogen compounds	Amines	***	61.4	81.9	M+H-H2O	C18H39NO3	0.524733	1.36234	0.00318376	0.0178037	-1.32064	0.400358	5907.01	14754.3	7992.12	5215.61	5605.96	5920.87	8954.37	3573.23	4086.92	15616.9	26833.8	9909.13	9550.05	17210.1	10846.4	13313.9
14.52_284.2713n	283.264	14.5243	neg	2,6-dimethyl-hexadecanoic acid		4324	LMFA01020042		5282623		Lipids and lipid-like molecules	Fatty Acyls	Fatty Acids and Conjugates	*	39	0	M-H, M+FA-H	C18H36O2	-0.824204	1.36046	0.000942058	0.00935589	-0.771003	0.58601	11367.1	19397.5	14334.5	10174.6	10827.2	9421.7	6992.04	12653.2	15166.6	26344.4	20151	16596.3	17382.2	15079.2	17557.5	22671.7
1.09_128.0709m/z	128.071	1.09103	pos	alpha-(Methylenecyclopropyl)glycine		66890		C08292	4479247	2517-07-9	Unclassified	Unclassified	Unclassified	*	53	70.2	M+H	C6H9NO2	1.97068	1.35224	0.000760259	0.00820289	-1.55202	0.341033	4138.44	12135	4149.67	3341.01	3597.91	3632.09	3403.26	5551.4	5293.75	15237.3	19128.6	7022.95	12048.9	5647.37	13666.6	12193.3
0.79_418.2297m/z	418.23	0.787683	pos	Cilazapril	HMDB0015433	1748		C11693	56330	92077-78-6	Organic acids and derivatives	Carboxylic acids and derivatives	Amino acids, peptides, and analogues	*	39.1	15.5	M+H	C22H31N3O5	-9.39087	1.3503	0.0175122	0.04973	1.07795	2.11104	18149.1	8597.25	18676.4	15687	34504.2	16532.1	18572.1	14550.6	8521.32	2650.32	9065.24	16565.5	7468.51	11585.6	7952.88	4892.59
9.86_398.1151n	397.108	9.86262	neg	Methyl acrylate-divinylbenzene, completely hydrolyzed, copolymer	HMDB0032389	88413			1151711	128903-15-1	Organoheterocyclic compounds	Pyridines and derivatives	Pyridyltriazoles	*	37.8	0	M-H, M+FA-H	C18H18N6O3S	-2.44095	1.34854	0.00226958	0.0149622	0.594635	1.51009	23239.5	15389.5	22886.1	20345.7	23524.7	26591.9	25772.3	24779.5	18776.6	10494.9	16599.7	20024	12069.1	22756.6	13401.4	12380.8
1.27_403.0480m/z	403.048	1.26793	neg	Aurintricarboxylic acid	HMDB0248731	349686			2259		Benzenoids	Benzene and substituted derivatives	Diphenylmethanes	*	46	49.5	M-H2O-H	C22H14O9	4.87939	1.34731	0.00547361	0.0239798	-1.84746	0.277881	3029.17	10900.9	926.737	4918.35	1057.43	920.016	1617.09	3887.55	7877.01	13180	7074.09	11562.6	5895.68	20435.8	4472.76	13685.7
0.75_217.0297m/z	217.03	0.7523	neg	Coumestan	HMDB0250498				638309		Phenylpropanoids and polyketides	Isoflavonoids	Coumestans	*	37.6	0	M-H2O-H	C15H8O3	0.732235	1.34447	1.68386e-05	0.000899118	-0.838857	0.559087	7760.05	13879.9	6910.15	8811.4	7143.67	5357.06	7877.19	7229.04	10991.8	14042.9	14280.6	13633.1	13876.6	16394.9	13857.8	11073.3
1.11_232.1425n	233.15	1.11178	pos	Ethylenediamine-N,N'-di-a-butyric acid		2589			164632	498-17-9	Unclassified	Unclassified	Unclassified	*	45.9	32.9	M+H, M+Na, M+H-H2O	C10H20N2O4	0.963031	1.34347	0.000942295	0.00935589	-1.02663	0.490856	6999.35	14259.5	9104.46	5874.09	5463.49	4557.37	5410.95	7252.46	11332.7	12412.5	14440.9	18447.3	12503.7	14390.9	19150.9	8470.04
4.20_763.4058m/z	763.406	4.2031	pos	Torvonin A	HMDB0030732	87158			131751074	99956-65-7	Lipids and lipid-like molecules	Steroids and steroid derivatives	Steroidal glycosides	*	37.1	0	M+K	C39H64O12	3.97698	1.34335	0.0121998	0.0390448	1.18263	2.2699	16193.6	7134.07	17856	15632.7	13958.2	24369	16961.3	12396.2	12181.8	857.643	8291.54	10765.7	1559.77	20668.7	2996.38	4798.69
10.79_478.2936m/z	478.294	10.7873	neg	LysoPE(0:0/18:1(11Z))	HMDB0011475	62263	LMGP02050039		53480924		Lipids and lipid-like molecules	Glycerophospholipids	Glycerophosphoethanolamines	***	68.1	95.9	M-H	C23H46NO7P	-0.694648	1.34208	0.0239485	0.061548	-0.609469	0.655438	18063.6	27559.6	11485	25583	14282.9	30138.6	14216.5	12636.6	18102.7	39760.8	23658.5	20112.9	28635.6	21838.3	30615.9	28295.4
4.14_500.2361m/z	500.236	4.13667	neg	20-Hydroxy-leukotriene E4	HMDB0012639	36255	LMFA03020025	C03577	5280606	111844-33-8	Lipids and lipid-like molecules	Fatty Acyls	Eicosanoids	*	36.2	0	M+FA-H	C23H37NO6S	8.22151	1.33776	0.00551576	0.0240552	-1.36261	0.388879	4972.33	12786.3	4541.32	13374.8	2040.25	284.343	1216.77	5098.57	8250.23	8315.49	7930.59	19356.1	15137.4	14541.6	10966.5	13256.6
9.98_472.3425m/z	472.343	9.97737	pos	Deoxycholylproline	HMDB0242438						Unclassified	Unclassified	Unclassified	*	40.7	8.65	M+H-H2O	C29H47NO5	0.788132	1.33752	0.0194797	0.0534289	2.92248	7.58146	10991	1449.73	10481.5	5326.21	7897.51	3068.14	31057.3	11735.5	7371.07	285.201	1489.07	2483.64	848.97	2934.79	937.99	1168.42
11.35_190.0500m/z	190.05	11.3511	pos	5-Hydroxy-6-methoxy-1h-indole-2-carboxylic acid	HMDB0246803	460309			160640		Organoheterocyclic compounds	Indoles and derivatives	Indolecarboxylic acids and derivatives	*	40.1	4.04	M+H-H2O	C10H9NO4	0.517979	1.33743	0.0199641	0.0543642	0.69786	1.6221	24401.8	15043.4	22946.6	19908.9	19746.4	43413	22592	20851.5	21354.2	10823.7	14013.7	18432.6	12281.8	21431.7	13678.8	14641.3
0.73_669.1245m/z	669.124	0.730267	neg	Nicotinamide ribotide	HMDB0000229	4167		C00455	14181	75414-16-3	Nucleosides, nucleotides, and analogues	Pyridine nucleotides	Nicotinamide nucleotides	**	39.2	0	2M-H	C11H16N2O8P+	4.29109	1.33698	0.00147016	0.0119504	2.02653	4.07423	9391.53	2305.11	14420.2	9382.55	9693.68	12160.1	1002.55	9649.19	9432.43	4658.95	2413.97	736.043	2676.21	469.053	327.576	4853.95
4.19_513.3039m/z	513.304	4.19065	pos	3-O-alpha-L-rhamnopyranosyl-3-hydroxynonanoyl-3-hydroxydecanoic acid			LMFA13030011				Lipids and lipid-like molecules	Fatty Acyls	Fatty acyl glycosides	*	49	51.8	M+Na	C25H46O9	1.05512	1.32787	0.00782145	0.0296274	1.00345	2.00479	16797.5	8378.69	20070.2	14685.6	24369.1	7645.03	21426.5	17160.6	12225.6	1328.85	9912.29	12462.9	7722.98	11926.8	10053.2	5243.77
0.73_166.0477n	165.04	0.730267	neg	Ribonic acid	HMDB0000867	3290		C01685	5460677	642-98-8	Organic oxygen compounds	Organooxygen compounds	Carbohydrates and carbohydrate conjugates	*	45.4	30.7	M-H2O-H, M-H	C5H10O6	-0.326565	1.32752	0.000138211	0.00316668	1.17536	2.25849	11456.3	5072.53	15531.9	8685.41	14292.7	9042.99	10283.5	13786.3	8570.95	4435.71	6042.37	4858.81	4856.89	5539.51	5823.12	3951.31
7.29_401.0875m/z	401.088	7.29388	neg	Isokanugin		51147	LMPK12112733		386324		Lipids and lipid-like molecules	Polyketides	Flavonoids	*	52	64.7	M+FA-H	C19H16O7	-0.851713	1.32264	0.0103987	0.0353763	0.448365	1.36449	31122.1	22808.6	33951	26609.2	33258	34501.9	32330.7	33854.5	23349.6	16037.7	22077.3	24956.4	19443.5	34430.3	21648.3	21066.5
10.74_524.2996m/z	524.3	10.7436	pos	PG(18:3(6Z,9Z,12Z)/0:0)		80008	LMGP04050020		52927443		Lipids and lipid-like molecules	Glycerophospholipids	Glycerophosphoglycerols	**	36.7	0	M+NH4	C24H43O9P	2.62618	1.32247	0.0100645	0.0346465	-1.31644	0.401524	5143.54	12810	1269.29	6215.67	6210.45	11404.3	4774.44	2583.59	3547.09	19894.8	9565.02	10082.5	21975.8	11764.2	9528.05	6859.86
9.87_332.1987n	331.191	9.87053	neg	PGA3		36189	LMFA03010140		5283112	36614-31-0	Lipids and lipid-like molecules	Fatty Acyls	Eicosanoids	*	52	65.6	M-H2O-H, M-H	C20H28O4	-0.0316234	1.32161	0.0320699	0.0755228	-1.94034	0.260555	3475.22	13337.7	2761.51	4389.3	1475.71	48.2976	948.527	3372.59	11330.6	32627.5	11087.8	8741.71	10707.2	5001.15	4408.5	20790.3
8.99_334.2354m/z	334.235	8.98742	pos	3-Oxotetradecanoic acid glycerides	HMDB0039848	94395			25080122	128331-49-7	Unclassified	Unclassified	Unclassified	*	38.9	0	M+H	C17H33O6-	1.30215	1.31956	0.00471798	0.0220662	0.567713	1.48217	23956.9	16163.4	21047.2	20865	20488.1	33027.9	24022.1	28145.1	20103.1	12754.4	16565.9	19388.9	13562.4	21956.2	14599.4	14316.5
9.66_421.3175m/z	421.317	9.65823	pos	Nb-Palmitoyltryptamine	HMDB0040815	95277			3726592	21469-15-8	Organoheterocyclic compounds	Indoles and derivatives	Indoles	*	37.4	0	M+Na	C26H42N2O	-3.62008	1.31878	0.0215818	0.0572667	0.653547	1.57303	25414.2	16156.2	21519.8	18129.5	19922.6	44079.8	27818.2	24822.7	21607.2	19157.9	11516.2	16184.8	13780.4	19129.3	18010.3	15314.5
12.74_656.4286n	655.421	12.7356	neg	Enalkiren	HMDB0251784				5230732		Organic acids and derivatives	Peptidomimetics	Hybrid peptides	*	38.6	0	M-H, M+FA-H	C35H56N6O6	3.70595	1.31846	0.000634552	0.00737112	0.767412	1.70221	16741.2	9834.95	17015	13340.3	17835.3	15988.5	20944.4	19758	12306.7	6789.74	9894.05	12017.8	8485.49	14033.1	8526.19	9098.28
0.77_182.9967m/z	182.997	0.773817	neg	6-Thiourate	HMDB0060417	449238		C16613	3032417	2002-60-0	Organoheterocyclic compounds	Imidazopyrimidines	Purines and purine derivatives	*	36.8	0	M-H	C5H4N4O2S	-8.08078	1.31805	0.0443978	0.094244	1.29431	2.4526	19270.1	7857.01	10907.9	45080.2	21554.6	6950.03	12608.3	11782.8	26007.1	8918.3	13302.3	7232.06	6559.77	8443.16	5403.67	5139.79
0.58_226.9659m/z	226.966	0.57955	neg	5-Sulfo-1,3-benzenedicarboxylic acid	HMDB0032822	88744			80714	22326-31-4	Benzenoids	Benzene and substituted derivatives	Benzenesulfonic acids and derivatives	*	38.2	0	M-H2O-H	C8H6O7S	1.49097	1.31428	0.0118967	0.0384416	0.55811	1.47234	25819.2	17536.1	27018.5	20411.1	25495.3	32125	30193.4	27045.8	18444.9	10932	17467.2	22386.1	12383.1	26580	18152.6	14851.9
0.79_234.1217n	235.129	0.787683	pos	2,6-Diamino-7-hydroxy-azelaic acid		69262		C12025	443585		Unclassified	Unclassified	Unclassified	*	40.3	8.51	M+H-H2O, M+H	C9H18N2O5	0.40265	1.31173	0.00174452	0.0131393	0.631345	1.54901	20829.1	13446.7	22501.6	17506.4	19680	21957.1	21006.2	25214.1	17938.2	8381.36	11215.7	19841.8	16378.5	15879.3	12359.8	10070.6
13.10_427.3062m/z	427.306	13.0967	neg	methyl 13-butylperoxy-9,11-octadecadienoate		74462	LMFA01040037		5282872		Lipids and lipid-like molecules	Fatty Acyls	Fatty Acids and Conjugates	*	39.1	0	M+FA-H	C23H42O4	-0.833976	1.30574	0.00323203	0.0179413	-2.09406	0.23422	2296.33	9804.16	1790.41	2080.59	1284.14	311.564	2024.98	1955.47	6627.16	18666	10417.5	4807.04	11768.7	3512.54	8206.9	11250.4
11.75_345.2433m/z	345.243	11.7513	neg	6-((Z)-pentadec-8-en-1-yl)salicylic acid		43889	LMPK15040003	C10794	5281858	22910-60-7	Lipids and lipid-like molecules	Polyketides	Phenolic lipids	*	50.7	59.6	M-H	C22H34O3	-0.545665	1.30371	0.00377967	0.0194839	-2.3357	0.1981	1814.7	9160.51	1996.99	3603.23	569.688	59.0219	487.097	1722.67	4264.22	20295.8	5885.34	7957.54	10280.1	6100.09	5527.59	8077.16
0.65_174.1115n	173.104	0.646067	neg	L-Arginine	HMDB0000517	5502		C00062	6322	74-79-3	Organic acids and derivatives	Carboxylic acids and derivatives	Amino acids, peptides, and analogues	***	63.6	95.7	M-H, 2M-H	C6H14N4O2	-0.730609	1.30181	0.0058177	0.0248621	0.521412	1.43536	27599.2	19228.1	27667.7	24815.2	38148.6	17859.4	31572	27525.1	25606.4	20253.7	19022	19456.3	22933.2	19440.2	15773.1	17718.1
0.73_275.0527m/z	275.053	0.72705	pos	1-Deoxy-D-altro-heptulose 7-phosphate		66168		C04359	15942876		Unclassified	Unclassified	Unclassified	*	38.6	0	M+H	C7H15O9P	0.0853623	1.3014	0.0230448	0.0599001	-1.01138	0.496071	8368.69	16870	3453.06	8815.75	4859.82	3323.13	14573.3	3178.08	20377.7	17119.3	16224	11456.2	20340.5	8826.8	19291.5	24831.3
12.72_838.5209m/z	838.521	12.719	pos	PE(20:4(7E,9E,11Z,13E)-3OH(5S,6R,15S)/18:0)	HMDB0261131						Unclassified	Unclassified	Unclassified	*	37.1	0	M+Na	C43H78NO11P	0.577814	1.29901	1.25114e-05	0.000757462	-2.2239	0.214062	1674.11	7820.69	3460.93	2110.3	932.393	438.211	539.272	539.571	3698.09	10499.3	8152.77	6493.3	8020.9	6185.94	5750.5	9642.08
9.84_208.1828n	209.19	9.84157	pos	2-Cyclotetradecen-1-one	HMDB0039884	94428			6365540	55395-12-5	Organic oxygen compounds	Organooxygen compounds	Carbonyl compounds	*	47.6	41.1	M+H-H2O, M+H	C14H24O	0.630874	1.29857	0.0301157	0.0721883	0.579902	1.49475	23251.4	15555.4	22870.9	24122.4	22836.3	22355.4	20791.8	32294.5	17488.4	17462.9	21408.5	13066.4	7160.59	12774.7	9879.2	27135.5
0.83_411.1476m/z	411.148	0.82825	pos	b-D-Xylopyranosyl-(1->4)-a-L-rhamnopyranosyl-(1->2)-L-arabinose	HMDB0041221	95640			131753072		Organic oxygen compounds	Organooxygen compounds	Carbohydrates and carbohydrate conjugates	*	40.5	17.3	M+H-H2O	C16H28O13	-4.8394	1.29324	0.0146824	0.0441976	0.942228	1.92149	15932.5	8291.75	20618.7	12876.8	12025	27074.7	17404.5	11170.7	10357.2	6711.59	14552.4	6397.06	5730.06	10053.1	4234.2	10363.8
10.95_249.1850m/z	249.185	10.9454	pos	2E,6Z,8Z,12E-hexadecatetraenoic acid		34941	LMFA01030277		5312429		Lipids and lipid-like molecules	Fatty Acyls	Fatty Acids and Conjugates	*	52.5	68.7	M+H	C16H24O2	0.442045	1.29309	0.00135121	0.0114368	0.671453	1.59268	18778.5	11790.5	18770.2	15603.9	18648.1	24089.5	18952.1	19387.1	15998.7	9403.85	12639.3	14595.7	8182.45	17859.9	10841.2	9011.33
0.63_83.0741n	84.0814	0.628083	pos	1-Piperideine	HMDB0243998	63458		C06181	68161		Unclassified	Unclassified	Unclassified	*	47.8	48.9	M+H, M+NH4	C5H9N	7.32011	1.2922	2.24341e-06	0.000303226	0.753029	1.68533	15261.2	9055.33	14055.2	15307.4	14572.5	15871.4	16176.5	14479.4	16366	10733.5	8107.23	9285.57	11690	8013.26	8969.99	6587.7
0.75_608.2398m/z	608.24	0.745533	pos	Bluensomycin		71784		C17573	20055290	11011-72-6	Unclassified	Unclassified	Unclassified	*	37.6	0	M+Na	C21H39N5O14	2.15836	1.28831	0.0102472	0.0350684	2.24727	4.74785	9879.01	2080.73	18638.7	9853.71	7642.35	3699.03	1054.61	15368.3	12896.3	4237.81	1505.02	2.41397e-06	6675.22	2.41397e-06	2.41397e-06	2147.09
1.11_379.0892n	360.071	1.1114	neg	Gonyautoxin V		348577		C20018	49789073	64296-25-9	Unclassified	Unclassified	Unclassified	*	36.9	0	M-H2O-H, M-H	C10H17N7O7S	-4.74197	1.28565	0.00531207	0.0235454	1.78645	3.44965	10097	2926.97	19212.1	7656.91	12590.9	4483.99	11046.8	10970.4	4718.18	909.128	2713.43	2739.92	1776.69	7587.61	3407	1355.03
12.04_447.2750m/z	447.275	12.0417	neg	(+)-Scalarin		53745	LMPR0105060001		42608279		Lipids and lipid-like molecules	Prenol lipids	Isoprenoids	*	39.4	0	M+FA-H	C25H38O4	-0.411116	1.28551	0.0211791	0.0565547	-1.28139	0.411399	5382.98	13084.6	2977.47	4993.38	2610.55	740.675	8032.75	4238.12	14087.9	22849.8	9387.48	6770.48	20856.5	8589.67	12395.1	10742.9
3.58_622.3203m/z	622.32	3.58292	pos	Lanceotoxin B		67238		C08873	441864	93802-98-3	Unclassified	Unclassified	Unclassified	*	37.1	0	M+NH4	C32H44O11	-3.18319	1.2852	9.44375e-06	0.000637314	1.97403	3.92864	8058.43	2051.2	7918.97	7468.24	8130.66	7448.93	10698.1	7779.85	6964.27	83.9712	2512.76	2766.25	1106.67	5515.78	712.522	1660.45
5.13_881.4533m/z	881.453	5.12767	pos	Parisvanioside B			LMST01080103				Lipids and lipid-like molecules	Steroids and steroid derivatives	Sterols	*	37.3	18.1	M+H-H2O	C45H70O18	0.380282	1.28502	0.0105047	0.035571	-1.52254	0.348073	4405.56	12657	2259.42	6103.95	10342	793.271	4720.3	4174.42	2445.57	15705.5	13386	4854.6	19827	2453.14	16879.7	15493.1
0.63_156.1497m/z	156.15	0.628083	pos	1-Ethyl-3-(dimethyl-aminopropyl)-carbodiimide	HMDB0258121				53787393		Organic nitrogen compounds	Organonitrogen compounds	Carbodiimides	*	41	9.9	M+H	C8H17N3	0.891434	1.28082	0.00262568	0.0161088	0.966242	1.95374	13632.8	6977.78	13953	10942.9	11453.1	19315.2	13303.2	17193.6	9268.71	3555.32	9867.4	12050.4	5228.68	7199.06	6002.81	4940.77
11.49_321.2426m/z	321.243	11.4917	pos	Ucriol	HMDB0036705	91737			12315549	87376-64-5	Lipids and lipid-like molecules	Fatty Acyls	Fatty alcohol esters	*	49.3	52.4	M+H	C20H32O3	0.441117	1.27874	0.0201649	0.0547657	-1.1996	0.435396	6741.11	15482.7	7997.23	9673.7	4508.92	2077.94	3366.9	5391.82	14171.2	29288.9	15883.6	10931.4	12899.2	9500.05	8299.57	21576.1
12.58_353.1424m/z	353.142	12.5799	neg	4-Amino-8-(2-fluoro-6-methoxyphenyl)-N-propylcinnoline-3-carboxamide	HMDB0248777				23581869		Organoheterocyclic compounds	Diazanaphthalenes	Benzodiazines	*	41.1	9.5	M-H	C19H19FN4O2	1.33964	1.2773	0.0296859	0.0713641	-0.968819	0.510924	9666.18	18919	12915.3	5154.81	7809.46	3114.61	5941	10695	22033.1	30677.1	20794.6	9982.43	18838.5	9246.04	18451.7	24442.7
12.18_896.5382m/z	896.538	12.1838	pos	PGP(16:0/22:4(7Z,10Z,13Z,16Z))	HMDB0013483				53481803		Lipids and lipid-like molecules	Glycerophospholipids	Glycerophosphoglycerophosphates	*	36.8	0	M+NH4	C44H80O13P2	-3.50283	1.27544	0.00565155	0.0244335	1.15471	2.2264	12703	5705.64	14600.8	10485.4	10839.7	20472.9	13429.2	12369	6724.21	2.41397e-06	8576.4	8423.91	3677.05	9796.18	3672.44	5793.54
0.77_131.0817m/z	131.082	0.76685	pos	Cucurbitine		68147		C10140	442634	6807-92-7	Unclassified	Unclassified	Unclassified	*	46.4	37.3	M+H	C5H10N2O2	1.56044	1.27393	0.00128102	0.0110997	2.04644	4.13085	8849.81	2142.37	14693.3	12225.5	11261.3	3718.96	7277.22	7437.02	5335.41	578.282	958.538	4038.11	3493.61	3454.93	1983.25	489.88
0.57_165.1170m/z	165.117	0.571967	pos	Carbamimidothioic acid, 2-(dimethylamino)ethyl ester	HMDB0244919				85296		Organosulfur compounds	Isothioureas	Unclassified	*	37.6	0	M+NH4	C5H13N3S	0.789114	1.27131	0.0370855	0.0833492	0.51623	1.43021	30940.3	21633.3	24559.6	20742.3	25908	37741.9	34056.1	40142.2	33431.9	10492.8	25280.8	28169.6	14059.7	31477.8	23181.6	18771.3
4.13_456.1052n	457.112	4.13127	pos	Flavin mononucleotide	HMDB0001520	6295		C00061	643976	146-17-8	Nucleosides, nucleotides, and analogues	Flavin nucleotides	Unclassified	***	65.4	98.7	M+H, M+Na	C17H21N4O9P	1.28187	1.26966	0.00608693	0.0255542	1.10731	2.15443	15523.4	7205.36	12354.5	21199.7	16296.4	7885.84	24797.1	12913.8	13216.8	4661.96	6048.21	9846.34	8964.2	12477	4720.68	3719.12
0.57_357.2298m/z	357.23	0.571967	pos	Emopamil	HMDB0012224	62871		C13766	71225	78370-13-5	Benzenoids	Benzene and substituted derivatives	Phenylbutylamines	*	37.2	0	M+Na	C23H30N2	-0.933884	1.26756	0.0430544	0.092356	0.641816	1.56029	26488.1	16976.3	21111.1	21599.6	32969.2	22405.6	38235.6	30806.6	18288.7	6194.82	19330.2	21286.2	11609.6	30224.8	9826.12	20362.6
2.85_270.0114n	315.01	2.85367	neg	3,5-Dinitro-4-hydroxyphenylpyruvate		66154		C04286	440284		Unclassified	Unclassified	Unclassified	*	38.5	0	M-H, M+FA-H	C9H6N2O8	-3.70881	1.26334	0.00289238	0.0169285	-2.8262	0.141003	1157.97	8212.39	206.901	2433.67	201.729	2.41397e-06	1165.11	1362.92	2735.47	15749.9	4732.12	6152.07	10669.3	1511.72	6458.04	12213.5
7.38_514.3491m/z	514.349	7.38117	pos	PG(P-18:0/0:0)		80029	LMGP04070002		52927462		Lipids and lipid-like molecules	Glycerophospholipids	Glycerophosphoglycerols	*	38.9	0	M+NH4	C24H49O8P	-2.42348	1.25832	0.000388576	0.00566105	9.42274	686.321	6474.56	9.43372	7391.27	3673.89	12942.6	1947.55	7691.86	5175.72	6499.04	2.41397e-06	2.41397e-06	2.41397e-06	2.41397e-06	66.036	2.41397e-06	2.41397e-06
13.71_357.2797m/z	357.28	13.7064	neg	12-[5]-ladderane-dodecanoic acid		45897	LMFA01140015		42607296		Lipids and lipid-like molecules	Fatty Acyls	Fatty Acids and Conjugates	*	51.4	62.5	M-H	C24H38O2	-0.610866	1.25702	0.0189922	0.0525549	-1.31806	0.401075	4908.04	12237.2	5225.35	4333.44	2717.48	671.813	4398.89	5634.76	11374.6	15588.5	6523.83	6761.78	24668	10395.3	9114.58	12608.6
3.76_298.0972m/z	298.097	3.7602	pos	5'-Methylthioadenosine	HMDB0001173	3425		C00170	439176	2457-80-9	Nucleosides, nucleotides, and analogues	5'-deoxyribonucleosides	5'-deoxy-5'-thionucleosides	***	58.6	86.9	M+H	C11H15N5O3S	1.31602	1.25458	0.000345365	0.00528951	2.27917	4.85399	7556.19	1556.7	12887.9	3501.64	10002.5	6854.93	8173.27	5926.76	5546.3	683.728	1811.7	1696.88	994.838	3096.11	1391.68	1221.95
10.01_448.3423m/z	448.342	10.0059	pos	Arachidonoylcarnitine	HMDB0006455	58409			136212424	36816-11-2	Lipids and lipid-like molecules	Fatty Acyls	Fatty acid esters	*	42	0	M+H	C27H45NO4	0.384216	1.25409	0.00459798	0.0217981	1.90854	3.75428	9896.14	2635.96	9633	7542.81	9703.15	3793.6	21074.2	8341.69	9184.58	536.824	3832.2	2317.75	1409.16	3604.47	2107.6	4643.75
4.19_159.1262n	182.115	4.19065	pos	DL-2-Aminooctanoic acid	HMDB0000991	5923	LMFA01100056		69522	644-90-6	Organic acids and derivatives	Carboxylic acids and derivatives	Amino acids, peptides, and analogues	*	40	5.07	M+H, M+Na	C8H17NO2	1.4952	1.25315	0.0397858	0.0874013	0.451678	1.36763	32590.9	23830.2	31386.7	27247.6	24468.5	52823.2	34119.5	32518.2	25572.5	20679	22348	25156.5	23424.4	29398.9	21751.5	24053.2
6.56_252.1571m/z	252.157	6.55847	pos	Icaridin	HMDB0253340				125098		Organoheterocyclic compounds	Piperidines	Piperidinecarboxylic acids and derivatives	*	39.4	0	M+Na	C12H23NO3	0.25731	1.24671	0.00132083	0.0112711	0.759755	1.6932	15462.5	9132.11	15136.6	12277.3	14357.6	23245.6	15719.3	15376.3	12124.9	7981.91	9413.51	10182.8	7427.79	11890.9	8221.43	8806.51
10.74_306.1521m/z	306.152	10.7436	pos	7-[(2-Benzyl-3-sulfanylpropanoyl)amino]heptanoic acid	HMDB0244471				129608		Lipids and lipid-like molecules	Fatty Acyls	Fatty acids and conjugates	*	37	0	M+H-H2O	C17H25NO3S	-0.415266	1.24091	0.0142255	0.0433327	-0.942755	0.520239	7230.48	13898.4	3012.28	9211.76	9210.23	12057.3	7791.81	1783.37	7546.63	19556.6	9040.37	12772.6	21441.2	13217.9	13169.6	8090.5
13.23_392.3733m/z	392.373	13.2349	pos	1-O-(2R-hydroxy-nonadecyl)-sn-glycerol			LMGL01020065		137323866		Lipids and lipid-like molecules	Glycerolipids	Monoradylglycerols	*	38.5	0	M+NH4	C22H46O4	-0.23218	1.23789	2.16972e-05	0.00104733	0.962209	1.94829	11479.5	5892.11	9863.03	10587.3	10628.9	15297.7	11932.2	11684.7	10362.9	5226.47	6701.56	7985.61	5204.12	6535.44	5077.76	4513.81
1.11_260.1971m/z	260.197	1.11178	pos	Lysylleucine	HMDB0028955	85857			7016103	7369-79-1	Organic acids and derivatives	Carboxylic acids and derivatives	Amino acids, peptides, and analogues	***	52.8	69.8	M+H	C12H25N3O3	0.934135	1.23267	0.00517028	0.0232517	-2.08278	0.236059	2141.32	9071.12	1551.26	3187.47	2871.1	531.417	2376.56	2220.36	2251.09	13612.6	9123.26	3976.78	15824	1079.57	12309.5	7572.1
12.67_899.5563m/z	899.556	12.6705	pos	PS(22:5(7Z,10Z,13Z,16Z,19Z)/22:6(4Z,7Z,10Z,13Z,16Z,19Z))	HMDB0116791				131823402		Lipids and lipid-like molecules	Glycerophospholipids	Glycerophosphoserines	*	36.5	0	M+NH4	C50H76NO10P	1.97981	1.2306	0.000215331	0.00405017	2.03631	4.10194	7698.35	1876.76	6360.9	8140.04	6203.6	13099.8	4772.65	9057.74	6253.73	1242.33	858.208	2412.68	1223.38	3897.49	1993.06	1510.14
13.26_305.2484m/z	305.248	13.2604	neg	3Z,6Z,9Z,11Z-Nonadecatetraene		97589	LMFA11000177		56936140		Lipids and lipid-like molecules	Fatty Acyls	Hydrocarbons	*	39.5	0.43	M+FA-H	C19H32	-0.775712	1.22977	0.00477843	0.0222203	-0.82684	0.563763	8252.7	14638.6	9105.58	7572.38	7576.33	2297.6	10486.3	8373.82	12356.9	17969.5	16021.3	11927.7	20921.6	12956.6	11001.3	11672.3
13.17_305.2484m/z	305.248	13.1699	neg	Dihomo-gamma-linolenic acid	HMDB0002925		LMFA01030158	C03242	5280581	1783-84-2	Lipids and lipid-like molecules	Fatty Acyls	Fatty acids and conjugates	*	41.3	10.8	M-H	C20H34O2	-0.523806	1.22395	0.00825419	0.0307193	-1.57804	0.334936	3611.62	10783	3480.65	1900.96	3278.77	1764.91	3153.79	4205.42	7496.82	21594.4	10443.9	6024.02	11246.8	6254.06	5911.93	14006
0.79_548.1011m/z	548.101	0.794883	neg	Uricase	HMDB0302660						Nucleosides, nucleotides, and analogues	(3'->5')-dinucleotides and analogues	(3'->5')-dinucleotides	*	37.2	0	M-H2O-H	C18H26N5O14P	-4.27722	1.21512	0.000107896	0.0027491	3.28112	9.72112	6268.13	644.795	6728.78	6683.27	10198.1	3158.61	8710.88	4460.44	3936.79	187.955	1046.39	1466.47	268.408	264.169	920.798	359.375
14.54_262.9759m/z	262.976	14.5421	neg	Perfluorovaleric acid	HMDB0256331	346583			75921		Organohalogen compounds	Alkyl halides	Alkyl fluorides	*	38.7	0	M-H	C5HF9O2	-0.520869	1.21465	2.39201e-07	9.69261e-05	1.65795	3.15569	7214.19	2286.09	7647.07	6431.56	7928.05	7660.68	7733.33	7819.26	5279.35	1362.29	2189.73	2768.45	1505.97	3654.3	2221.11	2300.79
11.99_259.2058m/z	259.206	11.9914	pos	11E,13E-octadecadien-9-ynoic acid		35165	LMFA01030511		5312641		Lipids and lipid-like molecules	Fatty Acyls	Fatty Acids and Conjugates	*	55.1	79.8	M+H-H2O	C18H28O2	0.496894	1.2146	0.0109249	0.0364707	0.534101	1.44804	23113.7	15962	19340.7	19568.6	22383.9	32760.9	25027	24411.4	18303.1	11926.2	17001	17853.9	12524.7	22984.9	13393.3	16050.3
11.57_609.3402m/z	609.34	11.5679	pos	DG(8:0/6 keto-PGF1alpha/0:0)	HMDB0297119						Unclassified	Unclassified	Unclassified	*	39.1	0	M+K	C31H54O9	0.53453	1.21062	0.000394918	0.00572861	0.946499	1.92719	11658.5	6049.46	11168.9	9240.12	12142.9	16139.1	11543.4	11510.7	9864.03	3932.69	7871.03	8342.58	3221.92	7963.94	4765.42	6248.6
10.44_202.1359n	203.143	10.4438	pos	2-Pentyl-3-phenyl-2-propenal	HMDB0031313	69414		C12288	1712058	122-40-7	Phenylpropanoids and polyketides	Cinnamaldehydes	Unclassified	*	50.3	55.7	M+H-H2O, M+H	C14H18O	0.507379	1.20983	0.00861825	0.0314895	0.74066	1.67094	17313.8	10361.7	18644.6	15208.6	15995.3	25350.8	16836.7	16791.5	12368.9	7702.69	9299.53	12880.5	7401.3	19004.8	7393.59	8849.47
0.77_323.1452m/z	323.145	0.76685	pos	N6-Galacturonyl-L-lysine	HMDB0033106	88997			131751374	220718-57-0	Organic oxygen compounds	Organooxygen compounds	Carbohydrates and carbohydrate conjugates	*	37.7	0	M+H	C12H22N2O8	0.865741	1.20761	0.00059065	0.00703935	1.84385	3.58966	8083.07	2251.77	9215.78	10756.4	8592.2	5727.39	12377.7	5435.1	4476.89	660.429	2425.26	891.325	4850.85	1249.69	2019.27	3665.53
10.33_527.3575n	528.365	10.3283	pos	Daphniphylline	HMDB0030291	86863			12309037	15007-67-7	Alkaloids and derivatives	Daphniphylline-type alkaloids	Unclassified	*	39.3	13.4	M+H, M+Na	C32H49NO5	-6.80321	1.20744	0.000327276	0.00517766	4.03919	16.4406	6431.55	391.2	4308.2	4586.73	9986.97	5584.91	11758.8	3036.17	5759.11	248.693	982.257	367.735	497.801	92.7234	310.454	238.735
3.68_605.3752m/z	605.375	3.67817	pos	2-Keto-2'-hydroxy-beta-carotene			LMPR01070779		14523231		Lipids and lipid-like molecules	Prenol lipids	Isoprenoids	*	36.2	0	M+K	C40H54O2	-0.682463	1.20604	0.0018035	0.0133444	1.69795	3.2444	9230.76	2845.14	12109.5	6539.53	13197.7	4477.7	11424.1	8969.19	7897.62	2.41397e-06	1949.72	6706.61	1400.46	6863.04	2380.19	615.96
13.45_313.0783m/z	313.078	13.4547	neg	Butamiphos		330907		C11022	37419	36335-67-8	Unclassified	Unclassified	Unclassified	*	39.2	0	M-H2O-H	C13H21N2O4PS	0.670356	1.20542	0.0434273	0.0929191	0.766883	1.70159	23246	13661.4	20782.7	29516.8	29877.6	21955.2	32315.2	16968.5	11306.2	14758.2	8353.7	11163	12702.4	31384.7	9271.82	7995.7
7.15_193.1589m/z	193.159	7.15452	pos	4-(2,6,6-Trimethyl-1,3-cyclohexadien-1-yl)-2-butanone	HMDB0037139	92107			577126	20483-36-7	Lipids and lipid-like molecules	Prenol lipids	Sesquiterpenoids	*	47	41.1	M+H	C13H20O	1.12447	1.20246	0.00158829	0.0125139	0.625634	1.54289	16968.8	10998.1	15838.8	14352.5	14500.6	24673.1	16916.4	17694.8	14805.4	9736.12	11462.4	12349.6	9754.22	13163.4	9486.01	11034.7
2.33_537.1434m/z	537.143	2.33263	neg	Niceritrol	HMDB0255580				4476		Organic acids and derivatives	Carboxylic acids and derivatives	Tetracarboxylic acids and derivatives	*	36.4	0	M-H2O-H	C29H24N4O8	3.19627	1.20139	0.00224563	0.0148821	-1.56667	0.337587	3369.59	9981.41	2096.23	5354.35	541.804	2223.32	4431.64	3441.49	5498.32	15659.2	13856	5908.78	7644.52	4658.91	9990.78	12151.7
11.56_276.1603m/z	276.16	11.5642	neg	alpha-Pyrrolidinovalerophenone	HMDB0244638	85222			11148955	5485-65-4	Organic oxygen compounds	Organooxygen compounds	Carbonyl compounds	*	39.8	2.21	M+FA-H	C15H21NO	-1.13612	1.19944	0.0012687	0.011044	0.709945	1.63574	15477.8	9462.27	14106.8	13932.1	16148.9	15901.5	18942.6	17467	11846	6084.28	9985.12	10470.6	7165.17	15242.9	8471.41	8816.44
0.82_815.0413m/z	815.041	0.816917	neg	oxalyl-CoA	HMDB0304445				25201721		Lipids and lipid-like molecules	Fatty Acyls	Fatty acyl thioesters	*	36.7	0	M-H2O-H	C23H31N7O19P3S-5	-1.98015	1.19818	9.14424e-08	7.10138e-05	-3.20994	0.108072	586.727	5429.04	440.385	2.41397e-06	2.41397e-06	2486.85	11.9475	2.41397e-06	1167.91	5833.72	4682.25	5291.14	6105.64	4866.66	4996.72	6227.17
7.17_299.1103m/z	299.11	7.17368	pos	Triethyl citrate	HMDB0034263	89812			6506	77-93-0	Organic acids and derivatives	Carboxylic acids and derivatives	Tricarboxylic acids and derivatives	*	39.8	4.31	M+Na	C12H20O7	0.729582	1.19797	5.26958e-05	0.00175679	1.92569	3.79919	6916.88	1820.62	6680.85	4624.69	6396.16	10837.3	5268.72	8629.38	5981.11	1584.6	2672.55	1530.75	1133.93	1808.45	1586.2	2427.86
4.18_756.3895m/z	756.389	4.17788	neg	PA(LTE4/12:0)	HMDB0262781						Unclassified	Unclassified	Unclassified	*	36.4	0	M-H2O-H	C38H66NO11PS	-2.71828	1.19742	0.0011697	0.0105425	-1.8518	0.277046	2392.51	8635.79	907.63	4362.98	3237.21	2.41397e-06	3019.11	2480.68	2739.95	9349.25	10392.8	5501.4	9281.35	2345.41	13399.1	10181.2
7.47_205.1233m/z	205.123	7.46957	neg	Ibuprofen	HMDB0001925	572		C01588	3672	15687-27-1	Phenylpropanoids and polyketides	Phenylpropanoic acids	Unclassified	*	49.5	50.3	M-H	C13H18O2	-0.660455	1.19569	0.0130919	0.041006	-1.2122	0.431609	4920.77	11401	5158.36	11908.5	1649.63	78.7585	2110.49	5314.65	8224.98	14666.1	5554.78	11874.8	18625.4	9870.67	10000.8	9214.31
8.50_302.2692m/z	302.269	8.49537	pos	Tanikolide		65441	LMFA07040124		5276592		Lipids and lipid-like molecules	Fatty Acyls	Fatty esters	*	48.5	46.6	M+NH4	C17H32O3	0.649433	1.18864	0.00153026	0.0122336	0.500701	1.4149	20134.5	14230.4	18731.7	18274.1	19818.6	27293.7	19694	19865.8	17263.8	13607.7	13368.5	16764.6	11503.6	16878.5	14103.5	13386.2
1.06_520.0063m/z	520.006	1.06302	neg	2',3'-Dideoxyadenosine-5-triphosphate	HMDB0060728	458609			65304	24027-80-3	Nucleosides, nucleotides, and analogues	Purine nucleotides	Purine deoxyribonucleotides	*	46.1	51	M+FA-H	C10H16N5O11P3	4.51949	1.18781	0.00524934	0.0234092	0.814315	1.75846	14644.4	8327.94	14267.7	15122.9	14154	9677.57	17733.8	20289.9	11264.9	3722.01	9658.83	11415.2	5389.29	12855	9047.54	6207.79
0.57_143.1544m/z	143.154	0.571967	pos	Bis(2-dimethylaminoethyl) ether	HMDB0246124				18204		Organic nitrogen compounds	Organonitrogen compounds	Amines	*	38.9	0	M+H-H2O	C8H20N2O	1.02748	1.18618	0.0406452	0.0886773	0.496603	1.41089	27619.5	19576	24492.7	18555.3	21132.9	34197.3	31041.8	35656.4	28260.3	10218.1	23250	26474.4	13917.6	28111.5	18040.4	17019.9
14.79_226.0121m/z	226.012	14.7875	pos	Ethoate-methyl		72742		C18983	8297	116-01-8	Unclassified	Unclassified	Unclassified	*	39	0	M+H-H2O	C6H14NO3PS2	0.522634	1.18507	0.0311627	0.0739456	0.322557	1.25055	38516.7	30799.9	38659.6	35830.3	34403.8	51383.5	39059.4	38460.3	31820.1	28000.8	29110.3	38591.3	26835.3	39064.5	26309.5	27687.8
9.26_271.1459m/z	271.146	9.26048	pos	1-(2,6,6-Trimethyl-2-cyclohexen-1-yl)-1,6-heptadien-3-one	HMDB0029704	86435			5365976	79-78-7	Lipids and lipid-like molecules	Prenol lipids	Sesquiterpenoids	*	39.6	0	M+K	C16H24O	-0.00743514	1.18276	0.00115166	0.0104694	0.569862	1.48438	17539.8	11816.2	17644.4	15177.1	15650.2	23523.5	17446.6	17631.4	15705.3	9543.15	11525.4	13164.7	9991.84	15847.1	10572.4	12069.1
14.51_151.0148m/z	151.015	14.515	neg	1,5-Dinitrocyclohexa-1,4-diene	HMDB0255345				91509475		Organic 1,3-dipolar compounds	Allyl-type 1,3-dipolar organic compounds	Organic nitro compounds	*	39	1.1	M-H2O-H	C6H6N2O4	-0.597007	1.17981	0.00951862	0.0334813	0.407526	1.32641	27161.4	20477.4	26550.2	25118.8	28060	29116.9	29695.6	29417.2	22170.9	14378.8	21276.6	24070.7	16513.5	29431.3	18980.9	18689.8
14.73_686.4910n	704.525	14.7327	pos	PA(13:0/22:2(13Z,16Z))		81254	LMGP10010088		52928681		Lipids and lipid-like molecules	Glycerophospholipids	Glycerophosphates	*	37.8	0	M+NH4, M+Na	C38H71O8P	3.40802	1.1782	0.0119519	0.0385365	-1.85801	0.275857	2860.03	10367.8	2479.38	4190.15	2447.68	1107.32	1071.34	7244.54	1479.81	8076.68	19690.6	10159.9	2090.55	17502.3	4956.45	10098.3
1.29_431.0788m/z	431.079	1.28688	pos	1,3-Dipropyl-8-p-sulfophenylxanthine	HMDB0244176				1330		Organoheterocyclic compounds	Imidazopyrimidines	Purines and purine derivatives	*	37.1	0.995	M+K	C17H20N4O5S	0.606154	1.17792	0.000159666	0.00342428	-1.45393	0.365026	2941.39	8058.02	1454.56	6222.6	1298.84	552.111	2707.92	3069.03	5284.67	7504.61	8223.05	9399.53	8116.1	9084.42	5384.85	8693.59
1.42_270.1450m/z	270.145	1.41913	pos	Tyrosyl-Alanine	HMDB0029098	85991			4078684		Organic acids and derivatives	Carboxylic acids and derivatives	Amino acids, peptides, and analogues	**	45.5	0	M+NH4	C12H16N2O4	0.671038	1.17778	0.000452931	0.00616014	-3.20008	0.108813	645.775	5934.75	71.8219	1765.75	202.762	113.32	298.552	950.447	1117.78	9744.44	2640.87	5407.7	9823.02	3175.9	5222.01	5529.29
4.69_244.1788n	245.186	4.6858	pos	N-(6-aminohexanoyl)-6-aminohexanoic acid		45748	LMFA00000009	C01255	895		Lipids and lipid-like molecules	Fatty Acyls	Other Fatty Acyls	*	42.3	15.6	M+H, M+Na	C12H24N2O3	0.463328	1.17535	0.0085872	0.0314364	-1.03673	0.487431	6510.26	13356.3	5579.09	7808.67	10615.6	3846.74	7421.98	5881.38	4418.33	17600.9	15075.5	6627.47	17772.9	5175.54	17209.8	14031.6
1.11_145.1337m/z	145.134	1.11178	pos	N-(3-Aminopropyl)morpholine		44782			61055	123-00-2	Unclassified	Unclassified	Unclassified	*	56	84.3	M+H	C7H16N2O	1.22063	1.17532	0.00123339	0.0108285	8.33647	323.242	6277.31	19.4199	6869.71	5889.03	6669.8	322.001	11055.7	2435.85	10699	93.3674	2.41397e-06	2.41397e-06	42.5715	2.41397e-06	2.41397e-06	2.41397e-06
12.53_677.4546m/z	677.455	12.5267	neg	3b-Hydroxy-17-(1h-1,2,3-triazol-1-yl)androsta-5,16-diene	HMDB0249984						Lipids and lipid-like molecules	Steroids and steroid derivatives	Androstane steroids	*	46.7	50.6	2M-H	C21H29N3O	-0.36921	1.17217	0.0101185	0.0347705	-2.36048	0.194727	1556.46	7993.06	3230.38	239.321	717.039	2.41397e-06	971.843	2539.02	3197.63	15702.1	5463.86	3765.56	15495.4	4216.69	3371.34	7936.44
13.40_210.1621n	228.196	13.3992	pos	9-tridecynoic acid		74259	LMFA01030602		5312723		Lipids and lipid-like molecules	Fatty Acyls	Fatty Acids and Conjugates	*	49.8	56.7	M+H, M+NH4	C13H22O2	0.547375	1.16341	0.00384475	0.0196411	0.584761	1.49979	19139.1	12761.2	17784.4	15992.6	20137.5	26605.1	18135.7	16995.3	18322.8	10876	11028.4	15928.3	10621.2	18509.6	11058.1	11306.5
10.96_271.1693m/z	271.169	10.9575	pos	1,3,5[10]-Estratriene-2,3-17 beta-triol	HMDB0244190	984293			9684		Lipids and lipid-like molecules	Steroids and steroid derivatives	Estrane steroids	*	41.8	16.1	M+H-H2O	C18H24O3	0.194721	1.15894	0.000140324	0.00318164	0.798032	1.73873	11862.9	6822.75	11417.7	10862.8	11190.2	14811.5	11382.2	12794.9	10581	5107.52	6678.79	8672.88	4282.31	9883.94	6370.25	6763.56
4.45_715.4358m/z	715.436	4.4491	neg	PA(18:3(6Z,9Z,12Z)/20:4(5Z,8Z,11Z,14Z)-OH(20))	HMDB0264101						Unclassified	Unclassified	Unclassified	*	37.3	0	M-H2O-H	C41H67O9P	1.874	1.14902	0.00247963	0.0156907	-1.45618	0.364457	3425.9	9400.01	1882.19	5569.57	6872.39	299.879	3897.1	2944.74	2515.4	9574.7	11849.8	7858.47	10592.8	2674.83	13666.7	9582.8
10.53_285.2669n	308.256	10.5258	pos	iso (4E,15-methyl-d16:1) sphingosine		53905	LMSP01080005		42608345		Lipids and lipid-like molecules	Sphingolipids	Sphingoid bases	*	47.3	41.3	M+H-H2O, M+Na	C17H35NO2	0.479716	1.14902	0.00249513	0.0157325	0.813823	1.75786	12323.2	7010.34	11903.6	9441.69	10667.1	18318.1	12624.8	14204.7	9102.42	4513.13	8885.44	7114.73	4425.52	8831.54	7537.74	7764.25
1.20_450.0188m/z	450.019	1.19915	pos	Adenosine 2',5'-bisphosphate		66062		C03850	440141	3805-37-6	Unclassified	Unclassified	Unclassified	*	38.2	0	M+Na	C10H15N5O10P2	0.475413	1.14494	0.0022868	0.015	3.40638	10.6028	5920.21	558.361	5936.76	3824.23	5580.76	13129.8	5904.52	6036.91	1028.44	261.828	976.616	1002.92	318.288	807.122	428.646	113.106
12.81_451.3063m/z	451.306	12.8118	neg	MG(0:0/22:4(7Z,10Z,13Z,16Z)/0:0)	HMDB0011554	62337			53480969		Lipids and lipid-like molecules	Glycerolipids	Monoradylglycerols	*	39	0	M+FA-H	C25H42O4	-0.471711	1.14214	0.0213821	0.0568841	-1.19891	0.435603	4890.7	11227.4	2409.77	4456.36	2799.94	463.04	4639.85	5040.32	14425.6	16479.1	9624.51	6572.86	16453.9	5513.57	10119.4	13828.5
2.25_107.0496m/z	107.05	2.24632	pos	Benzaldehyde	HMDB0006115	58358		C00261	240	100-52-7	Benzenoids	Benzene and substituted derivatives	Benzoyl derivatives	***	57.8	81.8	M+H	C7H6O	4.51679	1.14061	0.000147073	0.00327087	0.597176	1.51275	14615.6	9661.61	14017.9	12172.8	13274.8	19107.3	15246.6	15067.6	13422.5	10659.3	9323.25	9737.34	9448.88	10755.8	8268.73	9437.96
3.95_559.1424m/z	559.142	3.95103	neg	3-Hydroxy-2-(4-methylbenzoyl)-4H-1-benzopyran-4-one	HMDB0031969	88080			137185905	173866-78-9	Organic oxygen compounds	Organooxygen compounds	Carbonyl compounds	*	38.3	0	2M-H	C17H12O4	4.62838	1.1369	4.54362e-07	0.000135153	-2.33413	0.198316	1102.99	5561.78	522.089	1595.58	109.739	333.473	1226.51	1583.81	2349.71	5759.4	5865.93	4700.6	5608.3	4189	6946.23	5862.98
9.81_149.0963m/z	149.096	9.81343	pos	Cuminaldehyde	HMDB0002214	44723		C06577	326	122-03-2	Lipids and lipid-like molecules	Prenol lipids	Monoterpenoids	*	47.4	45.1	M+H	C10H12O	1.13971	1.13627	0.00688313	0.0273943	0.59571	1.51122	17268.8	11427.1	17799.2	13695.5	14791.9	24978.3	16615.9	18174.3	14826.3	8241.92	11622.5	11946.5	9095.27	16938	9874.3	12271
12.71_629.4547m/z	629.455	12.7102	neg	trans-1,4-Bis[[1-cyclohexyl-3-(4-dimethylamino phenyl)ureido]methyl]cyclohexane	HMDB0255813				9830692		Benzenoids	Benzene and substituted derivatives	N-phenylureas	*	39.1	0	M-H	C38H58N6O2	-0.232753	1.13418	0.00365289	0.0192157	-1.96068	0.256907	2008.04	7816.23	2640.09	590.106	1740.45	255.168	2797.71	2041.31	3991.47	9864.27	10219.6	3164.31	12537.9	4763.3	2900.39	11263.9
11.34_360.2149n	361.222	11.3373	pos	LY 255283		408244			122023	117690-79-6	Unclassified	Unclassified	Unclassified	*	38.3	0.0102	M+H, M+NH4, M+K	C19H28N4O3	-3.53537	1.13401	0.0143108	0.0434719	0.539018	1.45298	21238.1	14616.9	22746.1	16548.2	18495.1	31706.4	17660.3	19443.7	22067	9847.47	12910.1	16005.7	13928.8	20793	14906.6	13926.8
0.63_430.1412m/z	430.141	0.628083	pos	Flavoxate	HMDB0015279	66745		C07809	3354	15301-69-6	Phenylpropanoids and polyketides	Flavonoids	Flavones	*	37	8.98	M+K	C24H25NO4	-0.760222	1.13311	0.0255247	0.0643785	1.47827	2.78614	10192.2	3658.18	11210.1	5595.76	14426.6	18749.1	8789.21	10992.3	1582.34	523.858	6052.41	2361.85	609.448	11155.1	2861.51	2043.02
11.09_334.2357m/z	334.236	11.0927	pos	Carbetapentane	HMDB0249630	43477			2562	23142-01-0	Benzenoids	Benzene and substituted derivatives	Unclassified	*	40.1	16	M+H	C20H31NO3	-5.93766	1.13299	0.00107361	0.0100859	0.573376	1.488	17210	11565.9	16319.6	16492.6	13563.5	19486.9	15733.2	17965.2	20909.3	8369.4	10807.9	14706.3	10634.2	14963.6	11850.3	9629.42
2.77_460.2519m/z	460.252	2.76685	pos	Panax ginseng Tetrapeptide	HMDB0302146				10253669		Organic acids and derivatives	Carboxylic acids and derivatives	Amino acids, peptides, and analogues	*	41.5	14.1	M+H	C18H33N7O7	0.969353	1.13115	0.0103546	0.0352486	-1.64355	0.320068	3025.23	9451.84	1528.8	6274.94	5286.4	209.949	2719.21	2701.31	2456.03	7476.02	10573	6431.92	13272.5	1514.02	17808.8	9086.51
1.27_446.1518m/z	446.152	1.266	pos	[4,5-Bis(4-methoxyphenyl)-2-thiazolyl]-(4-methyl-1-piperazinyl)methanone	HMDB0252483				196841		Organoheterocyclic compounds	Azoles	Thiazoles	*	38	0.357	M+Na	C23H25N3O3S	2.23631	1.12826	0.00213253	0.014516	-3.17077	0.111046	664.929	5987.86	138.217	998.837	2.41397e-06	2.41397e-06	2.41397e-06	192.926	3324.53	13101.4	6066.84	3478.02	6702.49	3661.61	3473.41	5431.26
11.61_226.1591m/z	226.159	11.6132	pos	BRN 2646116		68710	LMFA08020168	C10944	5281870		Lipids and lipid-like molecules	Fatty Acyls	Fatty amides	*	40.5	5.6	M+H-H2O	C16H21NO	0.481783	1.12778	2.45186e-05	0.00111912	-2.57175	0.1682	925.638	5503.2	988.664	786.663	850.189	1112.86	1095.35	766.261	879.477	4063.17	6979.55	8293.29	6461.09	5320.57	4183.95	3220.76
0.84_289.0177m/z	289.018	0.838583	neg	Sulisobenzone	HMDB0258614	43340			19988		Benzenoids	Benzene and substituted derivatives	Benzophenones	*	37.7	1.06	M-H2O-H	C14H12O6S	0.123404	1.12548	0.0429914	0.0923036	-0.87568	0.544997	7578.62	13905.8	3338.21	15522.9	3329.52	2495.25	10287	3181.18	14896.2	11614.1	11929.9	18448.9	10497.3	22180.7	11503.1	11166.6
4.64_124.1123m/z	124.112	4.64248	pos	Allylisopropylacetamide	HMDB0248168				9297		Lipids and lipid-like molecules	Fatty Acyls	Fatty amides	*	47.2	40	M+H-H2O	C8H15NO	1.86147	1.12454	0.00578011	0.0247697	0.552645	1.46677	18266.4	12453.5	17883.3	15826.6	15674.1	26128.5	17009	19254.7	16088.6	10412.9	11511.9	14203.7	10526.8	17910.7	10932	11676.2
1.29_675.1620m/z	675.162	1.28923	neg	(5R)-5-[(1S)-1,2-Dihydroxyethyl]-3-[(2R,3R,4S,5S,6R)-3,4,5-trihydroxy-6-(hydroxymethyl)oxan-2-yl]oxyoxolane-2,4-dione	HMDB0260164				74959682		Lipids and lipid-like molecules	Fatty Acyls	Fatty acyl glycosides	*	38.2	0	2M-H	C12H18O11	-0.880669	1.12419	2.26904e-05	0.00108414	-4.73414	0.0375736	179.522	4777.88	2.41397e-06	314.667	2.41397e-06	2.41397e-06	2.41397e-06	2.41397e-06	941.988	4785.56	2450.66	5013.97	4316.2	5401.66	3368.14	8108.96
8.89_333.1683m/z	333.168	8.89208	neg	[4]-Gingerdiol 3,5-diacetate	HMDB0039132	93730			5318274	53254-50-5	Benzenoids	Phenols	Methoxyphenols	*	37.2	0	M-H2O-H	C19H28O6	-6.95859	1.12265	0.00863736	0.0315395	-1.77811	0.291565	2412.55	8274.48	2984.97	2597.45	1266.83	208.342	1039.73	3321.86	5468.67	15986.7	4675.05	4042.59	12186.6	4668.35	5974.06	10388
0.63_110.0717m/z	110.072	0.628083	pos	Brunfelsamidine		68140		C10133	176662	97744-98-4	Unclassified	Unclassified	Unclassified	*	50.6	59.4	M+H	C5H7N3	3.57113	1.1226	0.000213915	0.00403223	0.543595	1.4576	16650	11422.9	16514.4	16487.4	16695.2	15010	16956.6	14971.9	19914.7	13171.4	10826.9	10651.3	14690.5	8159.18	11656.3	10804.7
0.79_835.0557m/z	835.056	0.794883	neg	Rosacyanin B			LMPK12010439		44257039		Lipids and lipid-like molecules	Polyketides	Flavonoids	*	38.4	0	2M-H	C22H10O9	-2.42557	1.12047	0.0325083	0.076195	0.890904	1.85434	14795.8	7979	15180	17454.8	15243.3	13170	15085.8	18339.5	9097	360.569	11899.8	16810.4	2140.96	14469.5	9245.78	926.047
5.64_215.1523n	198.149	5.63947	pos	N-Nonanoylglycine	HMDB0013279				10176752		Organic acids and derivatives	Carboxylic acids and derivatives	Amino acids, peptides, and analogues	*	42.8	16.7	M+H-H2O, M+Na, M+H	C11H21NO3	0.589363	1.12002	0.013127	0.0410994	0.438514	1.35521	22666.1	16725.2	24423.7	18165.9	19646.3	29774.8	21696.1	25671.1	19284.6	16287.4	18598.8	16186.4	13500.3	23504.1	13939.6	15059.5
12.12_625.4235m/z	625.423	12.1219	neg	Pregna-1,9(11)-diene-3,20-dione, 21-(4-(2,6-di-1-pyrrolidinyl-4-pyrimidinyl)-1-piperazinyl)-16-methyl-, (5beta,16alpha)-	HMDB0247822				78172869		Lipids and lipid-like molecules	Steroids and steroid derivatives	Pregnane steroids	*	45	29.8	M-H	C38H54N6O2	-0.0961582	1.11719	0.0142015	0.0433034	-0.947589	0.518498	6406.09	12355.1	6642.85	2208.05	6648.37	1516.19	7478.64	6932.74	13415.8	18078.7	14365.7	7450.02	14327.8	11367.1	7639.52	13256.8
2.59_99.0087m/z	99.0087	2.58922	neg	Succinic anhydride	HMDB0032523	24050		C19524	7922	108-30-5	Organic acids and derivatives	Carboxylic acids and derivatives	Dicarboxylic acids and derivatives	*	54.2	73.9	M-H	C4H4O3	-0.872396	1.11049	0.00642268	0.0262916	-0.953179	0.516493	6167.39	11940.9	6053.87	7195	4830.43	3686.54	6652.68	7826.01	6927.22	19974.6	8347	12480.5	13432.7	6183.54	10329	12839
12.53_531.1949m/z	531.195	12.5267	neg	Galactan	HMDB0004162	7023		C05796	53477780	39300-87-3	Organic oxygen compounds	Organooxygen compounds	Carbohydrates and carbohydrate conjugates	*	38.1	0	M-H	C20H36O16	3.52829	1.10865	0.00658098	0.0266476	-0.738894	0.599198	8676.5	14480.2	14132.1	4482.43	6063.6	3499.8	9034.31	12440.5	11082.7	13518	14105.7	14023.7	16978.2	17571.9	10827.7	14336.2
4.28_165.0192m/z	165.019	4.27607	neg	Phthalic acid	HMDB0002107	6489		C01606	1017	88-99-3	Benzenoids	Benzene and substituted derivatives	Benzoic acids and derivatives	***	48.5	45.7	M-H	C8H6O4	-0.64217	1.10503	0.0291945	0.0705133	0.380967	1.30221	28893.8	22188.2	27982.1	25268.3	28684	34997.4	30935	31421.3	22968.5	15084.1	22313.3	26543.1	18298.2	33013.7	20310.9	19754.2
1.09_539.0667m/z	539.067	1.0895	neg	8-Hydroxytricetin 7-glucuronide			LMPK12111408		14162690		Lipids and lipid-like molecules	Polyketides	Flavonoids	*	47.4	47.7	M+FA-H	C21H18O14	-2.41659	1.10452	0.0260918	0.0653627	-2.18086	0.220545	1586.81	7194.96	367.736	644.098	634.869	61.5244	1019.19	673.436	7706.81	2920.02	2829.35	11413.5	7466.79	16735.9	4876.91	4122.22
12.86_726.4695m/z	726.47	12.8642	pos	PE(18:1(9Z)-O(12,13)/14:0)	HMDB0260629						Unclassified	Unclassified	Unclassified	*	37.6	0	M+Na	C37H70NO9P	2.07617	1.10388	0.000124816	0.00297715	-2.31344	0.201181	1172.51	5828.14	1785.82	1497.56	730.045	680.404	613.869	285.143	2614.72	8917.5	7482.94	3980.07	6859.17	3828.77	3683.66	6044.84
9.04_365.2331m/z	365.233	9.03827	neg	(-)-16alpha,17-Dihydroxy-atisan-3-one		53641	LMPR0104150005		42608225		Lipids and lipid-like molecules	Prenol lipids	Isoprenoids	*	51.8	63.7	M+FA-H	C20H32O3	-0.897424	1.10359	0.0358059	0.0815347	-1.15797	0.448143	5040.1	11246.6	4673.44	9755.58	1334.15	25.7971	2095.43	4456.83	12939.5	15751	5950.73	11049.6	19530	5968.56	7999.6	12476.9
2.01_252.1094m/z	252.109	2.00552	pos	5'-Deoxyadenosine	HMDB0001983	63895		C05198	439182	4754-39-6	Nucleosides, nucleotides, and analogues	5'-deoxyribonucleosides	Unclassified	*	56.4	85.3	M+H	C10H13N5O3	0.975137	1.10239	0.00218213	0.0146582	3.2894	9.77705	5933.41	606.871	7891.57	3259.94	13076.5	2335.29	4577.78	5287.71	5105.09	75.7932	362.265	762.534	1243.9	352.42	1136.61	314.578
11.58_548.2968m/z	548.297	11.5756	neg	LysoPE(0:0/20:3(8Z,11Z,14Z))	HMDB0011486	62274	LMGP02050050		53480935		Lipids and lipid-like molecules	Glycerophospholipids	Glycerophosphoethanolamines	*	37.5	0	M+FA-H	C25H46NO7P	-5.08318	1.09191	0.00973641	0.0339121	-1.13866	0.454182	4392.28	9670.75	5389.85	5299.99	4034.53	1679.17	4264.14	3378	6700.29	16923.8	7246.16	6769.68	12790.9	11223.6	4403.46	8337.6
5.01_258.1944n	259.202	5.00778	pos	Leucylleucine methyl ester	HMDB0248073				5159380		Organic acids and derivatives	Carboxylic acids and derivatives	Amino acids, peptides, and analogues	*	42.8	18.5	M+H, M+Na	C13H26N2O3	0.208896	1.0902	0.0374393	0.0839712	-0.708512	0.611951	11206.9	18313.4	7709.99	13454.3	19402.5	5377.46	13026.9	10648.9	8828.43	25189.5	23500.2	10575.1	20196	7997.05	22297.6	18438.7
2.09_298.0627n	595.119	2.0908	neg	N-Acetylserotonin sulfate	HMDB0060834	819057			45479248	94840-68-3	Organic acids and derivatives	Carboxylic acids and derivatives	Carboxylic acid derivatives	*	38.2	0	M-H, 2M-H	C12H14N2O5S	1.35216	1.08997	0.000281463	0.00476003	-1.68569	0.310855	2187.66	7037.57	3413.7	2998.08	200.608	96.6105	870.877	4283.39	3450.38	8027.19	6664.97	5422.94	8583.84	3789.7	8641.62	8132.76
1.09_414.2467m/z	414.247	1.09103	pos	Isopetasoside	HMDB0029622	86382			131750888	69809-29-6	Lipids and lipid-like molecules	Prenol lipids	Terpene glycosides	*	36.9	0	M+NH4	C21H32O7	-4.86243	1.08772	6.50699e-06	0.000522838	-2.91991	0.132136	621.415	4702.86	2.84448	1749.71	27.1991	2.41397e-06	3.54974	1302.48	1264.12	4417.06	3672.28	5132.1	6863.45	3464.04	5390.46	3980.61
14.54_209.0042m/z	209.004	14.5421	neg	2,2,2-Trifluoroethyl	HMDB0244040				2774975		Organohalogen compounds	Organofluorides	Unclassified	*	39	0	M+FA-H	C4H2F6	-0.583209	1.08685	1.38125e-06	0.000231572	1.27312	2.41684	6906.78	2857.77	6717.94	5726.38	7266.62	7517.28	7792.73	7879.67	5446.81	1937.34	2608.38	3377.19	2357.28	4112.81	2624.38	2987.02
4.16_252.1576n	253.165	4.15805	pos	Hexazinone	HMDB0253153	68694		C10926	39965	51235-04-2	Organic nitrogen compounds	Organonitrogen compounds	Amines	*	41.3	15.1	M+H, M+NH4, M+K	C12H20N4O2	-4.09472	1.08401	0.0209597	0.0561889	0.727552	1.65583	17149.9	10357.3	19045.2	13545.5	15662	24411.8	12883.8	11684.2	22816.9	4466.35	7708.47	15408	10725	16595.7	6357.75	11240
4.50_639.2970m/z	639.297	4.4972	neg	Feprazone	HMDB0252231						Benzenoids	Benzene and substituted derivatives	Unclassified	*	38.5	0	2M-H	C20H20N2O2	-0.992371	1.07959	0.0347662	0.079782	0.885171	1.84698	15349.8	8310.76	19244.3	18472.8	19021.4	3534.64	17849.6	15543.9	13782.3	489.297	4997.91	16752.9	9363.55	12088.8	10369.9	4112.94
15.14_760.5133m/z	760.513	15.141	neg	PI-Cer(d20:1/14:0)			LMSP03030151		126457741		Lipids and lipid-like molecules	Sphingolipids	Phosphosphingolipids	*	36.8	0	M-H2O-H	C40H78NO11P	-0.19092	1.07711	3.7164e-05	0.00141969	1.35555	2.55895	6969.4	2723.54	7693.35	9950.26	6835.14	6788.75	5169.77	6020.81	6327.7	1732.6	4000.57	2739.07	2360.36	3874.59	2461.36	1896.24
10.82_709.1625m/z	709.162	10.8233	neg	Apigenin 7-(6''-malonylneohesperidoside)		48817					Unclassified	Unclassified	Unclassified	*	36.3	0	M+FA-H	C30H32O17	0.473201	1.07512	0.00106283	0.010017	0.533636	1.44757	15331.1	10590.9	14725.6	13393.4	14791.7	16810.1	17760.3	17823.4	12013.4	8109.06	10089.5	11663.2	10096.3	14208.6	10199	9770.71
4.63_312.0595m/z	312.06	4.62695	neg	5'-Phosphoribosyl-N-formylglycinamidine	HMDB0002305	5930		C04640	440417	6157-85-3	Organic oxygen compounds	Organooxygen compounds	Carbohydrates and carbohydrate conjugates	*	38.6	0	M-H	C8H16N3O8P	-2.17985	1.07286	3.07912e-05	0.00127524	1.2481	2.37529	7193.23	3028.37	8107.02	6361.26	7867.91	8502.7	7324.57	6934.7	5254.48	1658.16	3116.13	4184.7	2175.49	5283.63	2504.05	2276.41
4.66_508.1545m/z	508.155	4.66127	neg	Sipoglitazar	HMDB0258310				9825652		Benzenoids	Phenol ethers	Unclassified	*	37.9	2.44	M+FA-H	C25H25N3O4S	-0.586098	1.07179	0.00493492	0.0226554	1.07988	2.11386	10296.7	4871.03	7335.34	14236.7	13918.4	3374.1	13012	10965.2	9234.97	3217.78	4905.34	5948.82	4880.98	3129.28	6700.19	5314.82
1.27_344.1107m/z	344.111	1.266	pos	3-Hydroxyhexanedioylcarnitine	HMDB0241674						Lipids and lipid-like molecules	Fatty Acyls	Fatty acid esters	*	48.5	51.9	M+K	C13H23NO7	0.266956	1.07156	0.0025913	0.0160077	-1.46709	0.361712	2750.76	7604.83	1520.99	4712.49	814.636	345.187	573.413	3283.64	8004.95	10800.2	7655.79	6350.07	7814.06	5337.43	6136.66	9139.63
0.59_208.1552m/z	208.155	0.58995	pos	Prometon	HMDB0256804	44586		C14186	4928	1610-18-0	Organoheterocyclic compounds	Triazines	1,3,5-triazines	*	37.1	0.417	M+H-H2O	C10H19N5O	-2.15805	1.07149	0.0324267	0.0760855	1.08746	2.12499	12289.2	5783.17	18726.8	12942.7	11588	9742.1	12867.4	12795.2	7362.31	176.463	1981.6	12425.3	2818.35	16255.1	5717.29	1108.15
4.61_838.4309m/z	838.431	4.60713	neg	PROTOVERATRINE A		43918		C10815	8931	143-57-7	Unclassified	Unclassified	Unclassified	*	36.3	0	M+FA-H	C41H63NO14	9.88257	1.07097	0.0403482	0.0882257	-0.783492	0.580959	10134.8	17445	8701.68	17482.5	10908.6	1682.15	8740.24	12410.7	11017.8	7291.76	16804.7	19739.1	16329.9	10724.9	25125.3	26099.2
12.53_329.2476m/z	329.248	12.5259	pos	Docosahexaenoic acid	HMDB0002183	3457	LMFA01030185	C06429	445580	6217-54-5	Lipids and lipid-like molecules	Fatty Acyls	Fatty acids and conjugates	***	68.6	95.3	M+H	C22H32O2	0.29626	1.06961	0.000333636	0.00520347	-1.02238	0.492305	4418.99	8976.12	5246.23	2123.03	3899.95	2955.02	3859.83	7310.53	5538.34	11750.2	8176.4	8715.3	9975.17	8122.82	6407.12	9685.81
4.99_852.4467m/z	852.447	4.98718	neg	PA(LTE4/18:3(6Z,9Z,12Z))	HMDB0264132						Unclassified	Unclassified	Unclassified	*	37	0	M-H	C44H72NO11PS	-2.74659	1.06922	0.0487477	0.100671	0.869951	1.8276	16488.2	9021.79	14899.2	15810.1	23602.5	4556.53	25849.4	12462.3	18237.6	2679.12	11456.3	11840.5	2226.99	17913.9	7076.33	9959.38
10.19_325.2019m/z	325.202	10.1903	neg	12S-HHT	HMDB0012535	35614	LMFA03050002	C20388	5283141	54397-84-1	Lipids and lipid-like molecules	Fatty Acyls	Fatty acids and conjugates	***	53.6	71.1	M+FA-H	C17H28O3	-0.645367	1.06721	0.0254674	0.0642878	-0.713572	0.609808	8828.92	14478.2	7207.11	8726.83	9643.16	1468.65	7761.78	14532.7	12462.2	18507.8	11148.3	8069.76	18795.1	17570.7	12258.2	14997.6
12.86_375.2271m/z	375.227	12.8642	pos	5-hydroxypropafenone	HMDB0060988	2150			107927	86384-10-3	Phenylpropanoids and polyketides	Linear 1,3-diarylpropanoids	Cinnamylphenols	*	39	1.26	M+NH4	C21H27NO4	-2.1737	1.0667	0.00783904	0.0296771	-1.12314	0.459095	4429.09	9647.43	5346.72	1814.43	2859.19	1169.96	2942.04	6136.52	10734.7	11232	7973.17	8619.66	12805.8	7697.98	5934.41	13269
10.00_424.3423m/z	424.342	9.9953	pos	Linoleyl carnitine	HMDB0006469	58418				36816-10-1	Lipids and lipid-like molecules	Fatty Acyls	Fatty acid esters	**	44.5	3.9	M+H	C25H45NO4	0.420844	1.06594	0.00868423	0.0316444	1.57615	2.98173	8358.53	2803.25	7655.32	8778.54	8413.77	2206.36	17460.2	7337.55	6658.03	1468.14	4313.81	3164.79	3592.5	1341.51	2830.24	2911.78
15.32_297.0470m/z	297.047	15.3201	neg	Phoxim	HMDB0256498				26927		Benzenoids	Benzene and substituted derivatives	Unclassified	*	39	0	M-H	C12H15N2O3PS	0.501083	1.0642	0.00504061	0.0229533	0.579956	1.4948	16225.3	10854.5	17273.1	13354.1	16188.7	19228.3	18055.7	16527.4	12950.2	6919.33	9312.76	14726.2	12488.4	15694.3	8492.4	8348.19
1.98_198.1007n	199.108	1.97543	pos	Metharbital	HMDB0014606	85385			4099	50-11-3	Organoheterocyclic compounds	Diazines	Pyrimidines and pyrimidine derivatives	*	42.7	18.9	M+H, M+Na	C9H14N2O3	1.37838	1.06211	0.00169266	0.0129096	3.65337	12.5827	5178.89	411.59	8951.33	3469.41	8998.84	17.0604	4893.26	5070.24	4852.12	163.78	212.342	435.967	779.474	370.377	749.098	170.09
2.56_304.1328m/z	304.133	2.56448	pos	3-Butyl-1-hydroxy-1-(4-methylphenyl)sulfonylurea	HMDB0257604				22389998		Benzenoids	Benzene and substituted derivatives	Benzenesulfonamides	*	38.1	0	M+NH4	C12H18N2O4S	0.750557	1.06152	0.000280152	0.00475168	-2.01379	0.247621	1398.67	5648.41	1146.76	3977.84	427.599	2.41397e-06	681.523	1326.79	2230.16	5928.53	3354.22	5904.4	8752.02	3952.47	5178.84	6468.42
0.85_219.1221n	202.119	0.848117	pos	DL-Ornithino-L-alanine	HMDB0029448	86275			18320455	25693-39-4	Organic acids and derivatives	Carboxylic acids and derivatives	Amino acids, peptides, and analogues	*	44.4	28.2	M+H-H2O, M+H	C8H17N3O4	0.777106	1.06035	0.047487	0.098776	-3.45168	0.0913989	674.765	7382.64	145.612	1694.13	190.852	2.41397e-06	196.233	560.844	1935.69	24208.4	1414.14	4109.89	6151.66	1291.98	4435.51	10066.9
13.08_317.2483m/z	317.248	13.0798	neg	Cembrene		41255	LMPR0104190002	C11893	6430770		Lipids and lipid-like molecules	Prenol lipids	Isoprenoids	*	45.5	30.9	M+FA-H	C20H32	-0.947852	1.06025	0.00496317	0.0227432	-1.40019	0.378879	3370.57	8896.16	4677.13	1601.08	2958.87	1901.89	3044.32	4132.67	5278.04	9504.36	9293.59	5193.2	10160.4	5958.96	5453.79	16708.8
4.22_394.1853n	393.178	4.2151	neg	cis-3-Hexenyl b-primeveroside	HMDB0031690	87866			131751183	132278-37-6	Lipids and lipid-like molecules	Fatty Acyls	Fatty acyl glycosides	*	54	77.3	M-H, M+FA-H	C17H30O10	3.46653	1.0602	0.0251746	0.0637168	-2.20685	0.216607	1955.45	9027.65	944.002	2428.99	4055.56	1293.83	1620.46	1581.3	1764.03	11113	22958.2	3715.98	4987.58	929.676	8079.56	11409.6
0.84_275.0214m/z	275.021	0.838583	neg	5-(but-3-en-1-yn-1-yl)-5'-methyl-2,2'-bithiophene		405724	LMFA12000352		3083681		Lipids and lipid-like molecules	Fatty Acyls	Oxygenated hydrocarbons	*	37.5	5.66	M+FA-H	C13H10S2	3.3041	1.05814	0.00626116	0.025931	-2.5119	0.175325	978.542	5581.31	2.41397e-06	919.577	0.265375	32.7003	706.704	2.41397e-06	5190.55	4738.46	2487.02	5077.11	4179.58	11650.9	7750.09	3186.01
1.11_190.0122m/z	190.012	1.1114	neg	2-carboxy-L-xylonolactone	HMDB0304063				90658445		Organic oxygen compounds	Organooxygen compounds	Carbohydrates and carbohydrate conjugates	*	47	44.3	M-H	C6H7O7-	1.45874	1.0574	0.00233244	0.0150937	1.12596	2.18246	8434.72	3864.77	9561.17	6593.14	7550.96	10333.1	8112.5	11976.1	4916.03	2016.91	4457.27	4558.89	2234.7	7937.98	2949.69	2897.95
4.64_244.0720m/z	244.072	4.63668	neg	Olaquindox	HMDB0255930				71905		Organoheterocyclic compounds	Diazanaphthalenes	Benzodiazines	*	37.8	0	M-H2O-H	C12H13N3O4	-2.94784	1.05393	0.00014498	0.00323672	1.01469	2.02046	8349.91	4132.67	9168.85	7161.02	9295.75	9673.1	8689.57	8074.07	6386.99	2315.5	4225.28	5550.67	2930.81	7042.12	3601.59	3262.7
0.77_465.0506m/z	465.051	0.76685	pos	Cysteineglutathione disulfide	HMDB0000656	5628			53477713	13081-14-6	Organic acids and derivatives	Carboxylic acids and derivatives	Amino acids, peptides, and analogues	**	39.1	0	M+K	C13H22N4O8S2	-1.09851	1.05194	0.00236633	0.0152084	1.43892	2.71118	7873.72	2904.17	5729.79	5907.07	7493.91	11393.4	5622.66	11223.6	7745.56	1048.78	1690.88	7338.26	3398.48	4194.78	2254.06	403.945
1.00_458.0331m/z	458.033	0.997533	neg	CDP-glycerol	HMDB0059599	63349		C00513	439249		Lipids and lipid-like molecules	Glycerophospholipids	CDP-glycerols	*	36.7	0	M-H2O-H	C12H21N3O13P2	-8.36049	1.05004	0.000683879	0.00769795	1.24729	2.37395	7751.35	3265.16	7620.1	8435.64	7959.55	6859.61	9384.26	8322.4	5677.87	154.982	4128.46	4925.08	1509.14	6784.56	3932.2	1421.72
11.20_837.1871m/z	837.187	11.1964	neg	Cyanidin 7-arabinoside	HMDB0037989	92773			131752265	28985-03-7	Phenylpropanoids and polyketides	Flavonoids	Hydroxyflavonoids	*	38.7	0	2M-H	C20H19O10+	-1.4795	1.04998	0.016037	0.046885	0.403868	1.32305	23817.9	18002.2	21305.8	19870.7	21184.5	27870.8	28232.1	27010.9	21250.3	12619.4	15544.6	21246.9	16721.2	25182.3	17200.6	17500.8
1.11_213.1235m/z	213.124	1.11178	pos	Prolylproline	HMDB0011180	62027			11622593	20488-28-2	Organic acids and derivatives	Carboxylic acids and derivatives	Amino acids, peptides, and analogues	*	45	34.1	M+H	C10H16N2O3	0.798916	1.04931	0.0361894	0.0820857	-1.39494	0.38026	3362.75	8843.29	1421.72	7180.23	1348.29	691.272	2452.7	3054.96	7390.07	13368.6	2528.51	7503.41	17980.7	3655.18	10348.1	6518.49
10.03_179.1432m/z	179.143	10.0314	pos	Aleprylic acid		34856	LMFA01030189		5282853		Lipids and lipid-like molecules	Fatty Acyls	Fatty Acids and Conjugates	*	48.9	48.8	M+H-H2O	C12H20O2	0.697903	1.04837	0.00482965	0.0223541	0.572649	1.48725	15298.7	10286.6	16411.2	12553.2	13637.6	20466.1	15224.1	14486.3	14312.5	7234.06	9624.18	13009	8643.02	15087.2	7852.45	10556
6.92_350.2303m/z	350.23	6.91678	pos	(9E)-9-nitrooctadecenoic Acid	HMDB0062738		LMFA01120004		11645581		Lipids and lipid-like molecules	Fatty Acyls	Fatty acids and conjugates	*	38.5	0	M+Na	C18H33NO4	0.383685	1.04757	0.00532506	0.0235771	0.585589	1.50065	14533.9	9685.05	15040.5	12061	12398.1	21790.4	14680.1	14225.6	11541.7	8151.27	10527.1	10816.9	8741.89	12119.8	8617.8	8820.6
4.33_579.2782m/z	579.278	4.3277	neg	Helveticoside		67234		C08869	441860	630-64-8	Unclassified	Unclassified	Unclassified	*	37.7	0	M+FA-H	C29H42O9	-5.41692	1.04202	0.0145106	0.0438792	-2.78609	0.144978	1076.61	7425.98	827.018	807.018	2492.43	941.97	824.978	951.577	691.243	12142.5	14743	1241.68	4081.38	267.679	6737.58	12768.1
1.67_286.1763m/z	286.176	1.66672	pos	4-Bis(2-hydroxyethyl)amino-L-phenylalanine	HMDB0247322				52933599		Organic acids and derivatives	Carboxylic acids and derivatives	Amino acids, peptides, and analogues	*	46.3	36.5	M+NH4	C13H20N2O4	0.761614	1.041	0.0167063	0.0482031	-1.43972	0.368638	3039.96	8246.47	2735.83	8427.42	776.93	138.983	559.878	3719.63	4921.06	5493.46	4128.64	15437.9	11791.2	6828.84	7685.93	6359.27
7.50_437.1650m/z	437.165	7.49575	pos	A-D-Glucopyranoside,6-O-acetyl-1,3,4-tris-O-(2-methyl-1-oxopropyl)-B-D-fructofuranosyl, 6-acetate2,3,4-tris(2-methylpropanoate)	HMDB0258030				22593306		Organic oxygen compounds	Organooxygen compounds	Carbohydrates and carbohydrate conjugates	*	38.9	0	M+H-H2O	C18H30O13	-0.696388	1.03361	0.00193829	0.0138338	-30.7287	5.62021e-10	2.41397e-06	4295.17	2.41397e-06	2.41397e-06	2.41397e-06	2.41397e-06	2.41397e-06	2.41397e-06	2.41397e-06	1007.09	2145.7	7385.97	4455.9	7988.1	5772.51	1310.9
0.88_111.0199m/z	111.02	0.8844	neg	Uracil	HMDB0000300	258		C00106	1174	66-22-8	Organoheterocyclic compounds	Diazines	Pyrimidines and pyrimidine derivatives	**	42.5	2.42	M-H	C4H4N2O2	-0.562542	1.03236	0.00188755	0.0136409	-0.830864	0.562193	5550.11	9872.25	3437.08	8598.65	3926.35	2299.86	5092.48	7731.62	7764.72	8051.41	8503.16	10264.3	9646.66	12602	9652.25	10386.1
9.66_239.1288m/z	239.129	9.65748	neg	Cucujolide IV		97393	LMFA07040036		56936046		Lipids and lipid-like molecules	Fatty Acyls	Fatty esters	*	55.4	79.1	M+FA-H	C12H18O2	-0.488023	1.03168	0.0104948	0.035559	0.47877	1.39355	18641.5	13377	15279.9	17220.8	19080	21097	22374.8	20804	14634.2	9908.9	12917.3	15645.3	9553.4	19237.7	14959.6	11416.5
0.55_200.1395m/z	200.14	0.554217	pos	Lysylalanine	HMDB0028944	85846			7010504	17043-71-9	Organic acids and derivatives	Carboxylic acids and derivatives	Amino acids, peptides, and analogues	*	40.9	16.4	M+H-H2O	C9H19N3O3	0.741911	1.03163	0.039778	0.0874013	-0.411551	0.751815	17081.3	22720.1	11910.5	14367.4	15229.9	12354.9	18444.6	24222.8	23039.2	23420.9	26888.5	22409.6	29257.3	19665.9	19245.5	18153.4
11.26_642.3775m/z	642.378	11.2582	neg	PKODA-PE			LMGP20020026		134812357		Lipids and lipid-like molecules	Glycerophospholipids	Oxidized glycerophospholipids	*	38.9	0	M-H2O-H	C33H60NO10P	-0.183613	1.02913	0.00372838	0.0193645	-1.19477	0.436857	3446.72	7889.81	2194.04	2851.05	1864.31	3857.42	4048.38	2198.34	7113.48	12512.2	7611.1	4445.59	9994.78	5416.25	8099.64	7149.12
0.77_131.1181m/z	131.118	0.76685	pos	N-Acetylputrescine	HMDB0002064	3252		C02714	122356	18233-70-0	Organic acids and derivatives	Carboximidic acids and derivatives	Carboximidic acids	**	41.3	0	M+H	C6H14N2O	1.43897	1.02902	0.000124465	0.00297353	3.31688	9.96505	4810.94	482.782	4186.29	4967.6	5066.17	1154.34	6619.32	4102.75	7580.12	675.464	362.04	487.44	782.931	349.966	398.096	323.536
0.69_313.1129m/z	313.113	0.690683	neg	Zanamivir	HMDB0014698	66814		C08095	60855	139110-80-8	Organic acids and derivatives	Carboxylic acids and derivatives	Carboxylic acid derivatives	*	37.3	0	M-H2O-H	C12H20N4O7	-7.45859	1.02892	0.0460684	0.0968821	0.943247	1.92285	10795.5	5614.33	16545.9	14943.6	9592.78	6833.51	12876	13441.7	1335.14	6192.16	8719.8	8055.74	5982.69	976.858	1499.95	7873.12
14.46_120.0559m/z	120.056	14.4582	pos	Isoniazid	HMDB0015086	788		C07054	3767	54-85-3	Organoheterocyclic compounds	Pyridines and derivatives	Pyridinecarboxylic acids and derivatives	*	38.6	0	M+H-H2O	C6H7N3O	1.91333	1.02696	0.00250506	0.0157665	0.43679	1.35359	17528.9	12950	17330.5	16950.2	15858.9	22540.7	16852.3	18124.2	15045.6	11794.2	11272.3	15293.9	11710	16512	12014.7	12052.6
1.29_569.0721m/z	569.072	1.28923	neg	Riccionidin A			LMPK12010445	C08728			Lipids and lipid-like molecules	Polyketides	Flavonoids	*	39.1	0	2M-H	C15H9O6+	-0.739516	1.0258	0.00782044	0.0296274	-1.16187	0.446933	3804.65	8512.8	2794.49	4746.8	3975.6	295.205	2872.95	4205.58	7741.92	3111.57	8677.36	12910.6	6985.12	11268.8	9398.95	7237.21
4.39_214.0333m/z	214.033	4.38995	neg	Monosodium glutamate	HMDB0303331				8887		Organic acids and derivatives	Carboxylic acids and derivatives	Amino acids, peptides, and analogues	*	39.8	0	M+FA-H	C5H8NNaO4	-0.093355	1.02572	0.0209411	0.0561652	-2.20907	0.216273	1497.66	6924.85	795.997	2772.26	497.666	163.104	980.327	1599.36	3674.91	17880.7	3758.67	3904.7	7778.75	2287.14	5102.63	7761.41
0.79_367.1052m/z	367.105	0.794883	neg	(+/-)-3-[(2-methyl-3-furyl)thio]-2-butanone	HMDB0032401	88425			12980878	61295-44-1	Organosulfur compounds	Thioethers	Aryl thioethers	*	38.9	0	2M-H	C9H12O2S	2.39905	1.02477	0.00130054	0.0111705	2.81873	7.05541	5255.05	744.825	5293.62	7199.87	9776.14	1488.42	6478.02	3380.39	3168.89	895.635	531.451	411.266	1032	197.939	1617.9	527.583
3.78_100.0316n	118.065	3.78143	pos	6beta,7beta,10beta-Cadina-1,4-diene	HMDB0303897	849553			57357909		Hydrocarbons	Polycyclic hydrocarbons	Unclassified	*	40.7	8.9	M+H, M+NH4	C8H4	3.26245	1.0218	0.000200843	0.00390838	0.5273	1.44123	13501.9	9368.32	13741.3	11845.8	11930.8	16478.6	13526.4	13068.7	13921.6	8805.15	9447.79	10685.3	8562.36	11766.4	8293.67	8017.62
6.41_245.0793m/z	245.079	6.41138	neg	N-(2-Pyrimidinyl)formamide	HMDB0252442				255580		Organic nitrogen compounds	Organonitrogen compounds	N-arylamides	*	45.9	35	2M-H	C5H5N3O	0.396383	1.02065	0.0395179	0.0869994	-0.858002	0.551716	6500.22	11781.8	4571.04	14425	3616.1	237.107	4133.58	6594.94	11923.8	13110.9	6662.24	13191.7	17641.3	9428	11452.2	10986.4
3.98_236.1164n	237.124	3.97865	pos	Alanylphenylalanine	HMDB0028694				96814	3061-90-3	Organic acids and derivatives	Carboxylic acids and derivatives	Amino acids, peptides, and analogues	**	45.2	21.2	M+H, M+K, M+Na	C12H16N2O3	1.17819	1.02034	0.0118372	0.0383204	-0.604715	0.657601	10222.9	15545.7	8934.61	17449.6	8720.2	6899.69	10578.6	10361.8	8615.69	12344.6	15492	14702	15895.6	13012.3	22449.7	14923.7
2.58_231.9896m/z	231.99	2.58245	neg	3,4-Dihydro-9-hydroxy-[1]benzothieno[2,3-f]-1,4-thiazepin-5(2H)-one	HMDB0253770	818666			45258277		Organoheterocyclic compounds	Benzothiophenes	1-benzothiophenes	*	39.7	12.5	M-H2O-H	C11H9NO2S2	-0.140306	1.01889	0.00342071	0.0185171	-1.27665	0.412752	3235.94	7839.9	2618.33	3577.15	2268.51	1864.63	3670.97	4514.86	4137.11	13871.4	5256.79	7802.19	8652.14	3820.03	6860.68	8616.1
14.72_216.8802m/z	216.88	14.7215	neg	Dicalcium orthosilicate	HMDB0303416						Mixed metal/non-metal compounds	Alkaline earth metal oxoanionic compounds	Alkaline earth metal silicates	*	36.9	0	M+FA-H	Ca2O4Si	1.37856	1.01834	0.00318139	0.0178019	0.972035	1.96161	8927.52	4551.13	11282.9	14654	8107.28	7313.27	7138.07	7593.54	6403.57	4180.63	5398.37	5412.76	2801.21	5314.6	5183.37	3566.94
4.81_173.0818m/z	173.082	4.81215	neg	Suberic acid	HMDB0000893	4243	LMFA01170001	C08278	10457	505-48-6	Lipids and lipid-like molecules	Fatty Acyls	Fatty acids and conjugates	***	74.8	90.1	M-H	C8H14O4	-0.637415	1.0143	0.00614087	0.0256891	0.493154	1.40752	16394	11647.5	16766.9	15170.1	16954	18388.9	17536.8	17328.5	12613.1	8120.24	11638.7	14398.4	9340.92	17508.8	10441	10084.2
13.49_656.4264m/z	656.426	13.4902	pos	PE(14:1(9Z)/14:0)	HMDB0008854	60298	LMGP02010424	C00350	52924129		Lipids and lipid-like molecules	Glycerophospholipids	Glycerophosphoethanolamines	*	38.2	0	M+Na	C33H64NO8P	0.422922	1.01315	0.0215741	0.0572639	-0.833283	0.56125	6946	12375.9	7059.98	5919.46	9348.02	5605.16	3570.97	6816.72	10301.7	22611	12948.8	10565.3	9597.78	10339.4	7335.09	13234.2
8.94_323.2227m/z	323.223	8.93763	neg	7Z-Octadecene-9-ynoic acid			LMFA01031246		14309405		Lipids and lipid-like molecules	Fatty Acyls	Fatty Acids and Conjugates	*	55.4	80.2	M+FA-H	C18H30O2	-0.417324	1.01306	0.00105986	0.00999443	-1.72857	0.301752	1831.58	6069.81	2807.55	2457.23	1850.86	691.842	1741.21	1705.4	1566.94	8987.04	5298.96	5491.91	9553.04	2099.26	5994.3	5064.2
10.30_476.2780m/z	476.278	10.296	neg	LysoPE(0:0/18:2(9Z,12Z))	HMDB0011477	62265	LMGP02050041		53480926		Lipids and lipid-like molecules	Glycerophospholipids	Glycerophosphoethanolamines	***	70.8	95.5	M-H	C23H44NO7P	-0.601509	1.01178	0.0435393	0.093069	-1.92288	0.263728	1984.86	7526.18	802.243	5116.05	872.42	3335.63	1646.43	961.728	1159.53	11572.1	3137.49	3280.77	17170.9	1838.82	13232	2451.22
13.98_409.1962m/z	409.196	13.9848	pos	icas#9			LMFA13040128		44205814		Lipids and lipid-like molecules	Fatty Acyls	Fatty acyl glycosides	*	37.5	0	M+NH4	C20H25NO7	-1.76947	1.0101	0.0112776	0.0371433	0.289372	1.22211	27215.3	22269.1	25974.6	22713.5	26147.6	33845.4	27437.2	27578.3	26810.3	25370.2	23457.6	21960.5	18275.2	25396.8	18981.7	22442
0.69_369.2498m/z	369.25	0.69025	pos	Sphingosine 1-phosphate (d16:1-P)	HMDB0060061	83702	LMSP01050005		52931110		Organic acids and derivatives	Organic phosphoric acids and derivatives	Phosphate esters	*	39.1	8.15	M+NH4	C16H34NO5P	-4.25872	1.00983	0.00902704	0.0324326	-3.5169	0.0873592	461.233	5279.73	233.766	1134.54	2.41397e-06	2.41397e-06	1180.71	382.61	297.008	13252.3	2213.31	2430.89	7425.09	2134.95	3479.72	6021.85
1.18_258.1814m/z	258.181	1.17767	pos	(2S)-2-Amino-6-[(3-formylpiperidin-1-yl)amino]hexanoic acid	HMDB0255325						Organic acids and derivatives	Carboxylic acids and derivatives	Amino acids, peptides, and analogues	*	45.8	35.1	M+H	C12H23N3O3	0.654891	1.00941	0.0274314	0.0675269	0.807419	1.75008	12826.3	7329.01	11202.4	10670.5	23164.7	16979.2	10453.9	11138.7	6174.97	4890.43	9718.94	7969.67	7679.23	7544.15	8251.14	5249.52
4.70_92.0625n	91.0552	4.70173	neg	Toluene	HMDB0034168	65600		C01455	1140	108-88-3	Benzenoids	Benzene and substituted derivatives	Toluenes	*	39.5	0	M-H, M+FA-H	C7H8	-1.29026	1.00909	0.00147483	0.0119605	-2.79079	0.144507	725.328	5019.33	328.438	709.081	327.438	12.7617	632.19	1434.71	1632.68	9890.65	3244.99	4079.13	6263.78	1471.97	4086.01	6098.77
9.72_302.3056m/z	302.306	9.71552	pos	Stearic acid	HMDB0000827	189	LMFA01010018	C01530	5281	57-11-4	Lipids and lipid-like molecules	Fatty Acyls	Fatty acids and conjugates	***	56.8	65.6	M+NH4	C18H36O2	0.739807	1.00834	0.00208759	0.014387	-1.69376	0.309121	2119.65	6857.01	2720.83	1560.59	1978.76	1875.02	3500.77	1442.63	1758.93	10950.8	10598.4	3421.36	3069.2	6152.99	6152.75	7653.64
10.53_329.1757m/z	329.176	10.5348	neg	4R,12S-dihydroxy-9-oxo-5E,7Z,10Z,14Z-prostatetraenoic acid-cyclo[8,12]			LMFA03120020		5283236		Lipids and lipid-like molecules	Fatty Acyls	Eicosanoids	*	55.8	84.4	M-H2O-H	C20H28O5	-0.400955	1.00695	0.0087437	0.0318012	-1.88819	0.270146	1640.13	6071.27	1534.91	2023.82	1537.06	47.4045	478.658	1979.36	3879.68	12161.6	1318.48	7503.45	7957.73	5426.09	3225.18	4906.41
4.28_223.1543m/z	223.154	4.2841	pos	Tetraglyme	HMDB0258894						Organic oxygen compounds	Organooxygen compounds	Ethers	*	41.4	10.7	M+H	C10H22O5	1.24385	1.0045	0.000221427	0.00410596	0.863015	1.81884	8213.69	4515.91	8034.36	8838.21	7518.28	10086.3	8489.03	8076.79	6452.84	2969.19	4225.08	5974.45	2196.98	5395.6	4646.61	6203.42
3.78_246.0084m/z	246.008	3.78143	pos	FR	HMDB0303046						Homogeneous metal compounds	Homogeneous alkali metal compounds	Unclassified	*	37.9	0	M+Na	Fr	-2.68297	1.00367	0.00503846	0.0229495	0.782389	1.71998	11053.9	6426.77	11205.2	10179.3	9627.9	17224.9	8449.27	10125.5	10565.1	4217.43	5965.16	7650.85	4735.21	10626.5	5545.69	6246.5
[truncated: 4 more rows]

## Sheet: MNP-MC_Mcontrol
ID	m/z	Retention time (min)	Ion mode	Metabolites	HMDB	METLIN	Lipidmaps	kegg	PubChem	CAS	Super Class	Class	Sub Class	level	Score	Fragmentation Score	Adducts	Formula	Mass Error (ppm)	VIP	P-value	adj.P-value	log2(FC)	FC	average(MNP-MC)	average(Mcontrol)	MX1	MX2	MX3	MX4	MX5	MX6	MX7	MO1	MO2	MO3	MO4	MO5	MO6	MO7
[truncated: 542 more rows]

[truncated: 3 more sheets: MNP_MMC, MNP-MC_MNP, MNP-MC_MMC]
