# Supplementary material
Source: MDPI journal article supplement (https://www.mdpi.com/2073-4441/15/19/3519)
Supplement: s1 [file s1 › water-2438706-supplementary.pdf]

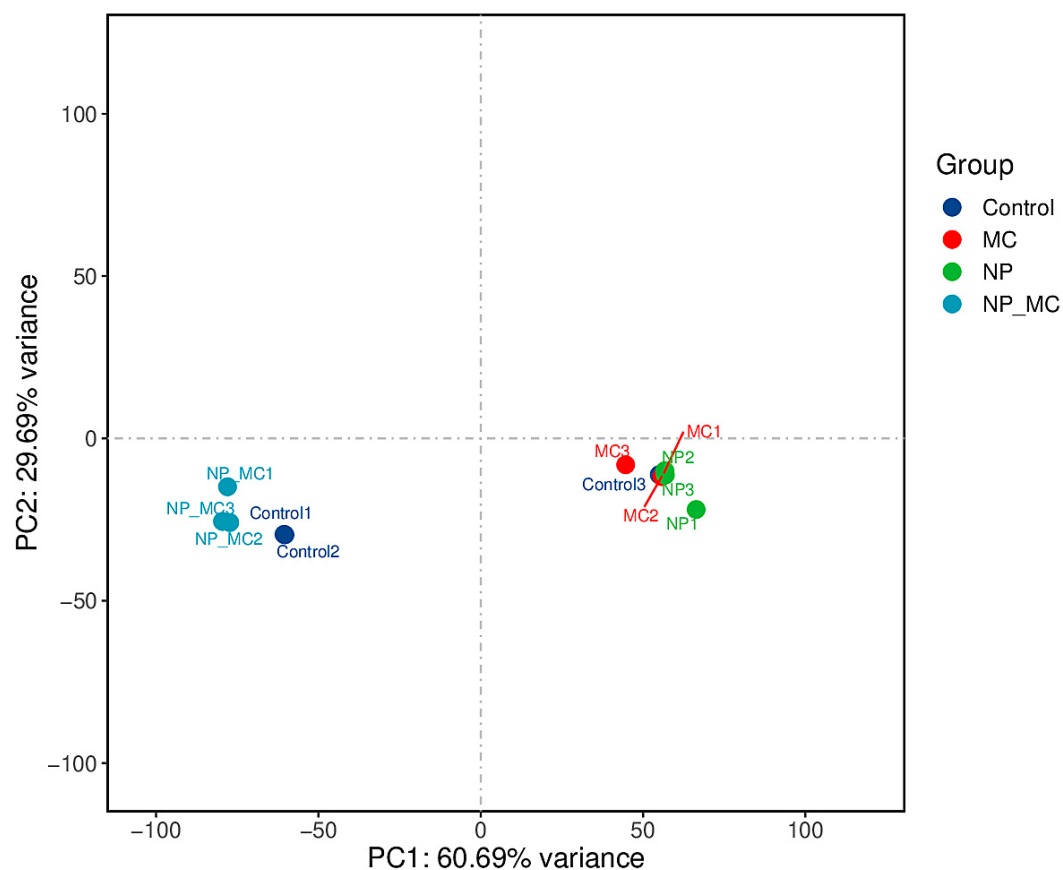

Figure S1. PCA plot of transcriptome samples.

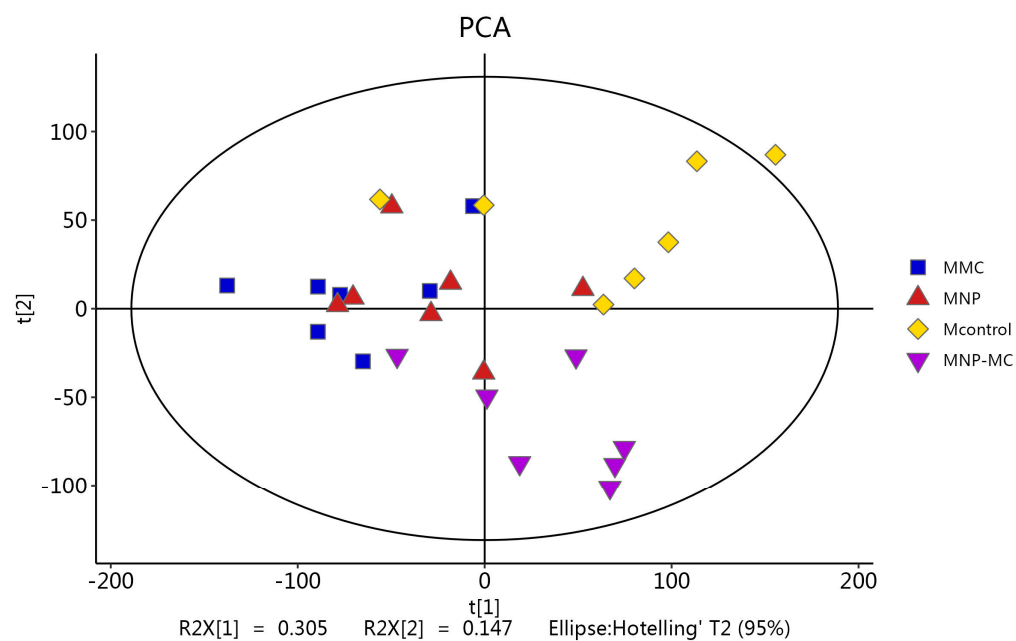

Figure S2. PCA plot of metabolome samples. The horizontal axis  $t[1]$  and the vertical axis  $t[2]$  of the PCA score plot represent the scores of each sample projected on the principal components PC1 and PC2, respectively. The elliptical area represents a 95% confidence interval.

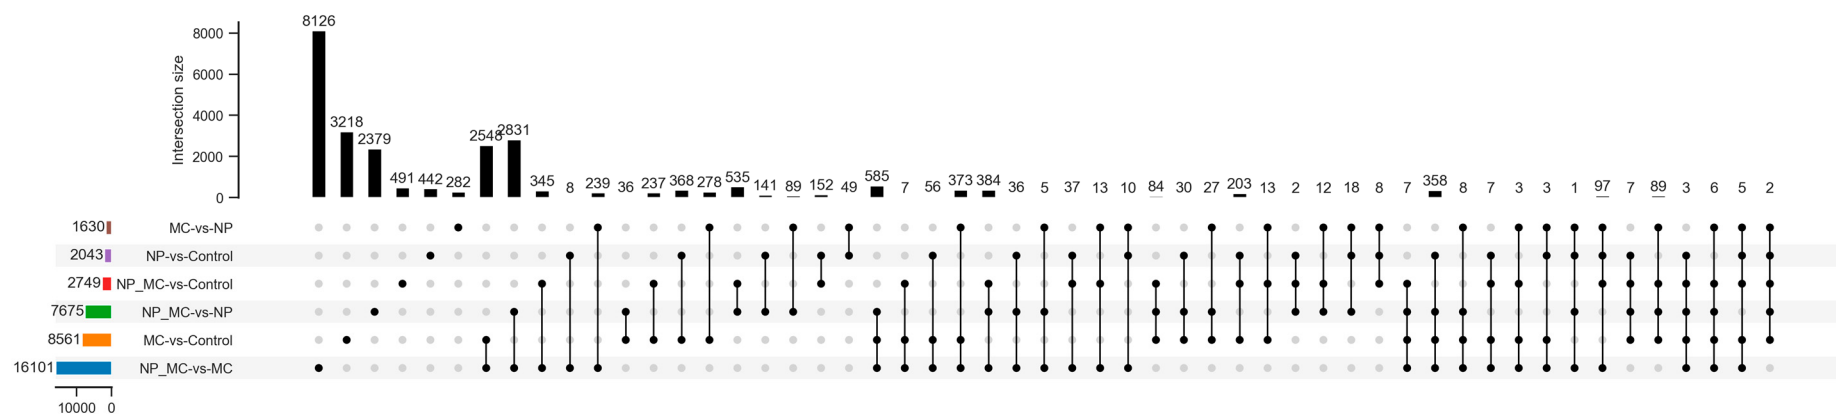

Figure S3. Venn analysis of transcriptomic analyses. The horizontal bar chart on the bottom left represents the number of elements in each set, the middle represents the combination method, and the bar chart above represents the number of elements in each combination.

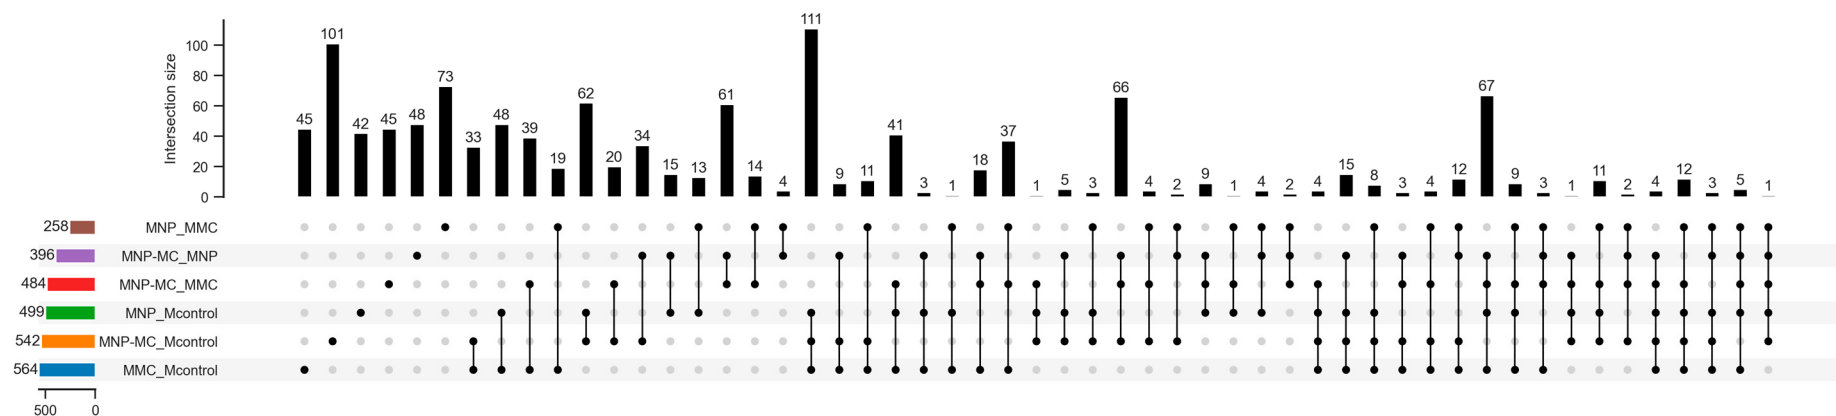

Figure S4. Venn analysis of metabolomic analyses. The horizontal bar chart on the bottom left represents the number of elements in each set, the middle represents the combination method, and the bar chart above represents the number of elements in each combination.
